# Supplementary material for: Sustainable Asymmetric Organolithium Chemistry: Enantio‐ and Chemoselective Acylations through Recycling of Solvent, Sparteine, and Weinreb “Amine”
Source: PubMed Central journal article supplement — ChemSusChem. 2019 Feb 13;12(6):1147–54. doi: 10.1002/cssc.201802815 (PMC6704367; doi:10.1002/cssc.201802815), 2019-02-13

## Supporting Information

### **Sustainable Asymmetric Organolithium Chemistry: Enantio- and Chemoselective Acylations through Recycling of Solvent, Sparteine, and Weinreb "Amine"**

Serena Monticelli,<sup>[a]</sup> Wolfgang Holzer,<sup>[a]</sup> Thierry Langer,<sup>[a]</sup> Alexander Roller,<sup>[b]</sup> Berit Olofsson,<sup>\*[c]</sup>  
and Vittorio Pace<sup>\*[a]</sup>

cssc\_201802815\_sm\_miscellaneous\_information.pdf

## Supporting Information

### Sustainable Asymmetric Organolithium Chemistry: Enantio- and Chemoselective Acylations through Recycling of Solvent, Sparteine and Weinreb "Amine"

Serena Monticelli,<sup>a</sup> Wolfgang Holzer,<sup>a</sup> Thierry Langer,<sup>a</sup> Alexander Roller,<sup>b</sup> Berit Olofsson<sup>c\*</sup> and Vittorio Pace<sup>a\*</sup>

<sup>a</sup> Department of Pharmaceutical Chemistry, University of Vienna, Althanstrasse 14, A-1090 Vienna, Austria. E-mail: [vittorio.pace@univie.ac.at](mailto:vittorio.pace@univie.ac.at); Web: <https://drugsynthesis.univie.ac.at/>

<sup>b</sup> University of Vienna, X-Ray Structure Analysis Center, Waehringerstrasse 42, A-1090 Vienna, Austria

<sup>c</sup> Stockholm University, Department of Organic Chemistry, Arrhenius Laboratory, SE-10691, Stockholm, Sweden. E-mail: [berit.olofsson@su.se](mailto:berit.olofsson@su.se)

#### Table of Contents

|                                                                                                                                                 |                    |
|-------------------------------------------------------------------------------------------------------------------------------------------------|--------------------|
| 1. Instrumentation and General Analytical Methods                                                                                               | 2                  |
| 2. General Procedures and Recovery Tables for sparteine, CPME and Weinreb amine                                                                 | 3                  |
| 3. Synthesis of ketones from lithiated 3-phenylpropyl diisopropylcarbamate <b>1</b>                                                             | 7 - 40             |
| 4. Synthesis of ketones from lithiated <i>R/S</i> -1-phenylethyl diisopropylcarbamate <b>18</b>                                                 | 41 - 53<br>54 - 59 |
| 5. Stereoselective Michael addition to $\alpha,\beta$ -unsaturated Weinreb amides                                                               | 60 - 61            |
| 6. Trapping of tetrahedral intermediate from lithiated 3-phenylpropyl diisopropylcarbamate <b>1</b> to Weinreb amide as <i>O-TMS</i> hemiaminal | 62 - 67            |
| 7. Synthesis of highly stable carbinol from lithiated 3-phenylpropyl diisopropylcarbamate <b>1</b> to <i>N</i> -acyl pyrrole                    | 68 - 83            |
| 8. Synthesis of ketones from lithiated <i>N</i> -Boc Pyrrolidine <b>32</b>                                                                      | 84 - 98            |
| 9. Synthetic manipulation of $\alpha$ -oxyketones                                                                                               | 99 - 109           |
| 10. X-ray Structural Analyses                                                                                                                   | 110                |
| 11. References                                                                                                                                  | 111-157            |
| 12. Copies of NMR Spectra ( <sup>1</sup> H and <sup>13</sup> C) for All the Synthesized Compounds                                               |                    |

## Instrumentation and General Analytical Methods

Melting points were determined on a Reichert–Kofler hot-stage microscope and are uncorrected. HRMS spectra were recorded on a Bruker maXis 4G instrument (ESI-TOF, APCI). Optical rotations were obtained on a Perkin-Elmer 241 polarimeter. Chiral HPLC separations were done on Shimadzu Prominence LC-20AD. Chiralpak columns IA, IB, IC, IG (150 x 2.1 mm) were used for normal phase separations.

$^1\text{H}$ ,  $^{13}\text{C}$ ,  $^{15}\text{N}$ ,  $^{19}\text{F}$  NMR spectra were recorded with a Bruker Avance III 400 spectrometer (400 MHz for  $^1\text{H}$ , 100 MHz for  $^{13}\text{C}$ , 40 MHz for  $^{15}\text{N}$ , 377 MHz for  $^{19}\text{F}$ ). The center of the (residual) solvent signal was used as an internal standard with  $\delta$  7.26 ppm ( $^1\text{H}$  in  $\text{CDCl}_3$ ), 7.16 ppm ( $^1\text{H}$  in  $\text{C}_6\text{D}_6$ ),  $\delta$  5.32 ppm ( $^1\text{H}$  in  $\text{CD}_2\text{D}_2$ ),  $\delta$  4.78 ppm ( $^1\text{H}$  in  $\text{CD}_3\text{OD}$ ),  $\delta$  77.00 ppm ( $^{13}\text{C}$  in  $\text{CDCl}_3$ ),  $\delta$  128.06 ppm ( $^{13}\text{C}$  in  $\text{C}_6\text{D}_6$ ),  $\delta$  54.00 ppm ( $^{13}\text{C}$  in  $\text{CD}_2\text{D}_2$ ), and  $\delta$  49.15 ppm ( $^{13}\text{C}$  in  $\text{CD}_3\text{OD}$ ).  $^{15}\text{N}$  NMR spectra (gsHMBC) were referenced against neat, external nitromethane, Absolute referencing was used for the  $^{19}\text{F}$  NMR spectra. Spin-spin coupling constants ( $J$ ) are given in Hz. As far as possible, full and unambiguous assignment of all resonances was performed by combined application of standard NMR techniques, such as APT, HSQC, HMBC, COSY and NOESY experiments.

CPME was distilled over Na/benzophenone. Light petroleum refers to the fraction of bp 40-60 °C. *N,N,N,N*-Tetramethylethylenediamine (TMEDA), (-)-sparteine and (+)-sparteine were distilled over  $\text{CaH}_2$  prior to use.

3-Phenylpropyl diisopropylcarbamate and *R/S*-1-phenylethyl diisopropylcarbamate were synthesized from the respective alcohols according to literature procedures.<sup>1</sup>

Weinreb amides were synthesized from the respective acyl chloride according to literature procedures.<sup>2</sup>

Chemicals were purchased from Sigma-Aldrich, Acros, Alfa Aesar, Fluorochem and TCI Europe unless otherwise specified. Solutions were evaporated under reduced pressure with a rotary evaporator. TLC was carried out on aluminium sheets precoated with silica gel 60F254 (Macherey-Nagel, Merck); the spots were visualized under UV light ( $\lambda = 254 \text{ nm}$ ) and/or  $\text{KMnO}_4$  (aq.) was used as revealing system.

### General Procedure 1 (GP1), used with 1.

A solution of 3-phenylpropyl diisopropylcarbamate **1** (0.294 mmol, 1.5 equiv) and (-) or (+)-sparteine (0.313 mmol, 1.6 equiv) under argon in anhydrous CPME (2 mL) was cooled to -78 °C. A solution of *s*-BuLi (1.3 M in cyclohexane/hexane 92:8, 0.313 mmol, 1.6 equiv) was added dropwise and the reaction mixture was stirred for 30 min, then Weinreb amide (0.196 mmol, 1.0 equiv) in CPME (1 mL) was slowly added. The reaction mixture was quenched after 3 h with HCl (1M solution, 5 mL) and stirred 1-2 min before the two phases were separated. The organic layer was washed with water, dried over anhydrous Na<sub>2</sub>SO<sub>4</sub>, filtered and distilled. The distillation afforded CPME (ca. 80% - for full details see Table S3) and, a saturated solution of ketone (ca. 0.5 mL) which was crystallized by cooling from the residual CPME appropriately left. The acidic aqueous layer was basified with NaOH (20% *aq.*) and extracted with CPME (5 mL). The organic layer was distilled to recover *N,O*-dimethylhydroxylamine (bp 43 °C, see table 2), CPME (bp 106 °C, see table 3) and sparteine (137-138 °C, 1.33 mbar, see table 1). Racemic ketone has been prepared using TMEDA as HPLC reference.

### General Procedure 2 (GP2), used with 18.

A solution of (*R*) or (*S*)-1-phenylethyl diisopropylcarbamate **18** (0.294 mmol, 1.5 equiv) under argon in anhydrous CPME (2 mL) was cooled to -78 °C. A solution of *s*-BuLi (1.3 M in cyclohexane/hexane 92:8, 0.313 mmol, 1.6 equiv) was added dropwise and the reaction mixture was stirred for 5 min, then Weinreb amide (0.196 mmol, 1.0 equiv) in CPME (1 mL) was added slowly. The reaction mixture was quenched after 3 h with HCl (1M solution, 5 mL) and stirred 1-2 min before the two phases were separated. The organic layer was washed with water, dried over anhydrous Na<sub>2</sub>SO<sub>4</sub>, filtered and distilled. The distillation afforded CPME (ca. 80% - for full details see Table S3) and a saturated solution of ketone (ca. 0.5 mL) which was crystallized by cooling from the residual CPME appropriately left. The acidic aqueous layer were basified with NaOH (20% *aq.*) and extracted with CPME (5 mL). The organic layer was distilled for recovering *N,O*-dimethylhydroxylamine (bp 43 °C) and CPME (bp 106 °C). Racemic ketone has been prepared using racemic 1-phenylethyl diisopropylcarbamate **18**.

### General Procedure 3 (GP3), used with 32.

A solution of *N*-Boc-pyrrolidine **32** (0.454 mmol, 1.5 equiv) and (-)or(+)-sparteine (0.485 mmol, 1.6 equiv) under argon in anhydrous CPME (3 mL) was cooled to -78 °C. A solution of *s*-BuLi (1.3 M in cyclohexane/hexane 92:8, 0.485 mmol, 1.6 equiv) was added dropwise and the reaction mixture was stirred for 30 min, then Weinreb amide (0.303 mmol, 1.0 equiv) in CPME (1 mL) was added slowly. The reaction mixture was quenched after 3 h with HCl (1M solution, 5 mL) and stirred 1-2 min before the two phases were separated. The organic layer was washed with brine, dried over anhydrous Na<sub>2</sub>SO<sub>4</sub>, filtered and distilled. The distillation afforded CPME (ca. 80% - for full details see Table S3) and a

saturated solution of ketone (ca. 0.7 mL) which was crystallized by cooling from the residual CPME appropriately left. The acidic aqueous layer was basified with NaOH (20% *aq.*) and extracted with CPME (5 mL). The organic layer was distilled for recovering *N,O*-dimethylhydroxylamine (bp 43 °C), CPME (bp 106 °C) and sparteine (137-138 °C, 1.33 mbar). Racemic ketone has been prepared using TMEDA as HPLC reference.

### Recovery procedure for (-)- and (+)-sparteine, Weinreb amine and CPME

Experiments in which sparteine, Weinreb amine and CPME were amenable for recovery were run at larger scale as indicated in the appropriate experimental section. Subsequent distillations afforded each single component which could be reused in additional experiments as detailed.

Because of the very limited amount of sparteine used in some cases, the recovery was realized collecting together the basified water phases of a set of different reactions, extracting with CPME and distilling the organic phase.

**Table S1.** Recovery of sparteine.

| Synthesis of compound        | Sparteine used (g) | Sparteine recovered (g) | Recovery yield (%) |
|------------------------------|--------------------|-------------------------|--------------------|
| <b>(R)-3</b>                 | 1.5 <sup>a</sup>   | 1.2                     | 80                 |
| <b>(S)-3</b>                 | 1.5 <sup>b</sup>   | 1.25                    | 83                 |
| <b>(R)-5</b>                 | 1.5 <sup>a</sup>   | 1.21                    | 81                 |
| <b>(R)-8</b>                 | 1.5 <sup>a</sup>   | 1.24                    | 83                 |
| <b>(S)-11</b>                | 1.5 <sup>b</sup>   | 1.2                     | 80                 |
| <b>(R)-12</b>                | 1.5 <sup>a</sup>   | 1.15                    | 70                 |
| <b>(R)-15</b>                | 1.5 <sup>a</sup>   | 1.24                    | 83                 |
| <b>(R)-33</b>                | 1.5 <sup>a</sup>   | 1.2                     | 80                 |
| <b>(S)-33</b>                | 1.5 <sup>b</sup>   | 1.18                    | 79                 |
| <b>(R)-36</b>                | 1.5 <sup>a</sup>   | 1.17                    | 78                 |
| <b>(S)-36</b>                | 1.5 <sup>b</sup>   | 1.22                    | 81                 |
| <b>Others</b> <sup>a,c</sup> | 1.88               | 1.5                     | 80                 |
| <b>Others</b> <sup>b,d</sup> | 0.81               | 0.57                    | 70                 |

<sup>a</sup> (-)-sparteine. <sup>b</sup> (+)-sparteine. <sup>c</sup> The basic water phases corresponding to the preparation of compounds: **(R)-3,4,5,6,7,8,9,10,11,12,13,14,15,16,17,33,34,35,36,37,38,39** were collected together, extracted with CPME and then distilled. <sup>d</sup> The basic water phases corresponding to the preparation of compounds: **(S)-3,9,11,14,16,33, 34, 36, 37** were collected together, extracted with CPME and then distilled.

**Table S2.** Recovery of Weinreb amine.

| Synthesis of compound | Weinreb amide used (mmol) | Weinreb "amine" recovered (mmol) / g | Recovery yield (%) |
|-----------------------|---------------------------|--------------------------------------|--------------------|
| ( <i>R</i> )-3        | 4                         | 2.8 / 0.171                          | 70                 |
| ( <i>S</i> )-3        | 4                         | 3.0 / 0.183                          | 75                 |
| ( <i>R</i> )-5        | 4                         | 3.1 / 0.189                          | 77                 |
| ( <i>R</i> )-8        | 4                         | 2.8 / 0.171                          | 70                 |
| ( <i>S</i> )-11       | 4                         | 2.6 / 0.159                          | 65                 |
| ( <i>R</i> )-12       | 4                         | 2.6 / 0.159                          | 65                 |
| ( <i>R</i> )-15       | 4                         | 2.8 / 0.171                          | 70                 |
| ( <i>R</i> )-33       | 4                         | 3.0 / 0.183                          | 75                 |
| ( <i>S</i> )-33       | 4                         | 2.4 / 0.147                          | 60                 |
| ( <i>R</i> )-36       | 4                         | 2.5 / 0.153                          | 62                 |
| ( <i>S</i> )-36       | 4                         | 2.6 / 0.159                          | 64                 |
| Others <sup>a</sup>   | 5.06                      | 3.59 / 0.219                         | 71                 |
| Others <sup>b</sup>   | 4.93                      | 3.45 / 0.211                         | 70                 |

<sup>a</sup> The basic water phases corresponding to the preparation of compounds: (*R*)-3,4,5,6,7,8,9,10,11,12,13,14,15,16,17,33,34,35,36,37,38,39 were collected together, extracted with CPME and then distilled.

<sup>b</sup> The basic water phases corresponding to the preparation of compounds: (*S*)-3,9,11,14,16,33, 34, 36, 37; (*R*)-19,20,21,22,23; (*R,R*)-24,25; (*S*)-19,20,21,22,23; (*S,S*)-24,25 were collected together, extracted with CPME and then distilled.

**Table S3.** Recovery of CPME.

| Synthesis of compound        | CPME used (mL)   | CPME recovered (mL) | Recovery yield (%) |
|------------------------------|------------------|---------------------|--------------------|
| <b>(R)-3</b>                 | 27 <sup>a</sup>  | 23.0                | 85                 |
|                              | 30 <sup>b</sup>  | 27.5                | 92                 |
| <b>(S)-3</b>                 | 27 <sup>a</sup>  | 23.0                | 85                 |
|                              | 30 <sup>b</sup>  | 25.8                | 86                 |
| <b>(R)-5</b>                 | 27 <sup>a</sup>  | 24.3                | 90                 |
|                              | 30 <sup>b</sup>  | 28.2                | 94                 |
| <b>(R)-8</b>                 | 27 <sup>a</sup>  | 24.0                | 89                 |
|                              | 30 <sup>b</sup>  | 27.0                | 90                 |
| <b>(S)-11</b>                | 27 <sup>a</sup>  | 23.2                | 86                 |
|                              | 30 <sup>b</sup>  | 28.3                | 94                 |
| <b>(R)-12</b>                | 27 <sup>a</sup>  | 24.4                | 90                 |
|                              | 30 <sup>b</sup>  | 27.7                | 92                 |
| <b>(R)-15</b>                | 27 <sup>a</sup>  | 24.7                | 91                 |
|                              | 30 <sup>b</sup>  | 28.0                | 93                 |
| <b>(R)-33</b>                | 27 <sup>a</sup>  | 22.9                | 85                 |
|                              | 30 <sup>b</sup>  | 26.4                | 88                 |
| <b>(S)-33</b>                | 27 <sup>a</sup>  | 24.3                | 90                 |
|                              | 30 <sup>b</sup>  | 27.3                | 91                 |
| <b>(R)-36</b>                | 27 <sup>a</sup>  | 24.7                | 91                 |
|                              | 30 <sup>b</sup>  | 28.1                | 94                 |
| <b>(S)-36</b>                | 27 <sup>a</sup>  | 24.0                | 89                 |
|                              | 30 <sup>b</sup>  | 27.0                | 90                 |
| <b>Others</b> <sup>b,c</sup> | 110              | 93.5                | 85                 |
| <b>Others</b> <sup>b,d</sup> | 115 <sup>d</sup> | 95.5                | 83                 |

<sup>a</sup>Solvent used for running reaction.

<sup>b</sup>Solvent used for work-up procedure.

<sup>c</sup> CPME employed for the extraction of the basic aqueous phases collected from the work-up followed for the preparation of compounds: **(R)-3,4,5,6,7,8,9,10,11,12,13,14,15,16,17,33,34,35,36,37,38,39**.

<sup>d</sup> CPME employed for the extraction of the basic aqueous phases collected from the work-up followed for the preparation of compounds **(S)-3,9,11,14,16,33, 34, 36, 37; (R)-19,20,21,22,23; (R,R)-24,25; (S)-19,20,21,22,23; (S,S)-24,25**.

**(R)-1-(3-Bromophenyl)-1-oxo-4-phenyl-2-butanyl diisopropylcarbamate, ((R)-3)**

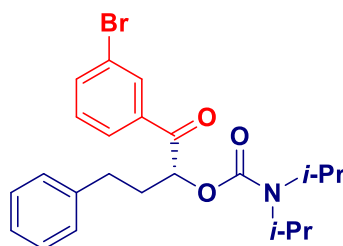

Synthesized according to **GP1** using **1** (0.077 g, 0.294 mmol, 1.5 equiv); (-)-sparteine (0.073 g, 0.313 mmol, 1.6 equiv); *s*-BuLi 1.4 M (0.022 mL, 0.313 mmol, 1.6 equiv) in CPME (2 mL); and 3-bromo-*N*-methoxy-*N*-methylbenzamide (0.048 g, 0.196 mmol, 1.0 equiv) dissolved in CPME (1 mL); compound **(R)-3** was obtained in 95% yield (0.082 g) as a white solid; mp 75-82 °C. Reaction run in larger scale starting from **1** (1.58 g, 6 mmol, 1.5 equiv); (-)-sparteine (1.5 g, 6.4 mmol, 1.6 equiv); *s*-BuLi 1.4 M (4.57 mL, 6.4 mmol, 1.6 equiv) and 3-bromo-*N*-methoxy-*N*-methylbenzamide (0.972 g, 4 mmol, 1.0 equiv) in CPME (27 mL) allowed to recover CPME (85%, 23 mL) and prepare **(R)-3** in comparable yield (90%, 1.6 g). The organic layer from the basic extraction with CPME (30 mL) afforded upon distillation (-)-sparteine (80%, 1.2 g, 1.18 mL), *N*-methyl-*N*-methoxyamine (70%, 2.8 mmol, 0.21 mL) and CPME (92%, 27.5 mL). (Entry 5, optimization table)

**<sup>1</sup>H NMR** (400 MHz, CDCl<sub>3</sub>): δ 7.97 (m, 1H, *m*-Br Ph H-2), 7.76 (m, 1H, *m*-Br Ph H-6), 7.66 (m, 1H, *m*-Br Ph H-4), 7.30 (m, 2H, Ph H-3,5), 7.29 (m, 1H, *m*-Br Ph H-5), 7.22 (m, 1H, Ph H-4), 7.17 (m, 2H, Ph H-2,6), 5.77 (m, 1H, CHC=O), 4.02 (br s, 1H, CHCH<sub>3</sub>), 3.86 (br s, 1H, CHCH<sub>3</sub>), 2.89-2.74 (m, 2H, PhCH<sub>2</sub>), 2.13-2.20 (m, 2H, CH<sub>2</sub>CH), 1.33 (br, 6H, CH<sub>3</sub>), 1.20 (br, 6H, CH<sub>3</sub>).

**<sup>13</sup>C NMR** (100 MHz, CDCl<sub>3</sub>): δ 196.5 (*m*-Br Ph C=O), 154.7 (NC=O), 140.5 (Ph C-1), 136.8 (*m*-Br Ph C-1), 136.0 (*m*-Br Ph C-4), 131.4 (*m*-Br Ph C-2), 130.2 (*m*-Br Ph C-5), 128.6 (Ph C-3,5), 128.4 (Ph C-2,6), 126.9 (*m*-Br Ph C-6), 126.3 (Ph C-4), 122.9 (*m*-Br Ph C-3), 74.5 (CHC=O), 46.8 (br CHCH<sub>3</sub>), 45.7 (br CHCH<sub>3</sub>), 32.9 (CH<sub>2</sub>CH), 31.8 (PhCH<sub>2</sub>), 21.8 (br, CH<sub>3</sub>), 21.4 (br, CH<sub>3</sub>), 20.4 (br, 2×CH<sub>3</sub>).

**HRMS** (ESI), *m/z*: calcd. for C<sub>23</sub>H<sub>29</sub>BrNO<sub>3</sub> 446.1325[M+H]<sup>+</sup>; found 446.1324.

**[α]<sub>D</sub>** -41 (c 0.5, CHCl<sub>3</sub>).

**HPLC analysis:** Chiralpak IA Column, λ 250 nm, eluent: *n*-hexane / *i*-propanol 80/20. Flow: 1 mL/min



## E-factor calculation

Total amount of reactants: 1.58 g + 0.972 g + 1.5 g + 31.08 g + 36.6 g + 3.514 g + 49.02 g = 124.27 g

Amount of final products: 0.170 g + 1.6 g + 43.43 g + 1.2 g = 46.4 g

Amount of waste: 124.27 g - 46.4 g = 77.87 g

**E-factor** = amount of waste/ amount of final products = 77.87 g/46.4 g = **1.68**

### Reactants

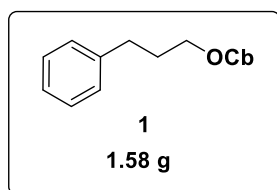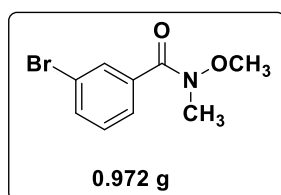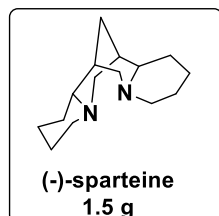

CPME (27 mL + 30 mL) = 57 mL density: 0.86 g/mL = 49.02 g  
HCl (1M solution, density 1.036 g/mL, 30 mL) = 31.08 g  
NaOH (20% aq. density 1.22 g/mL, 30 mL) = 36.6 g  
s-BuLi 1.4 M in cyclohexane (4.57 mL, density: 0.769 g/mL) = 3.514 g

### Products

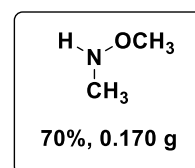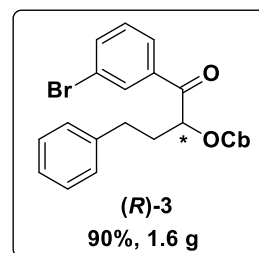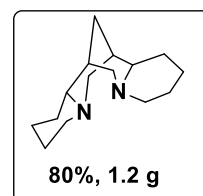

CPME (23 mL + 27.5 mL) = 50.5 mL 43.43 g

### Racemate

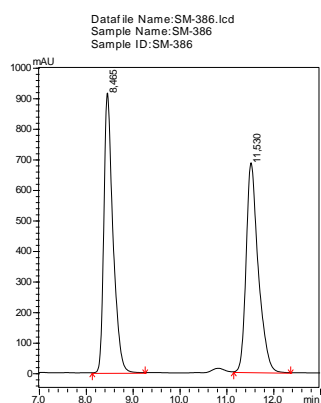

| Peaks | Retention time (min) | Area     | Area%   |
|-------|----------------------|----------|---------|
| 1     | 8,465                | 12371983 | 50,205  |
| 2     | 11,530               | 12270746 | 49,795  |
| Total |                      | 24642729 | 100,000 |

### Enantioenriched (R)-3

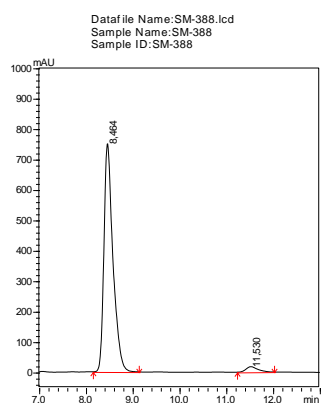

| Peaks | Retention time (min) | Area     | Area%   |
|-------|----------------------|----------|---------|
| 1     | 8,464                | 10041535 | 97,006  |
| 2     | 11,530               | 309944   | 2,994   |
| Total |                      | 10351480 | 100,000 |

**(S)-1-(3-Bromophenyl)-1-oxo-4-phenyl-2-butanyl diisopropylcarbamate, ((S)-3)**

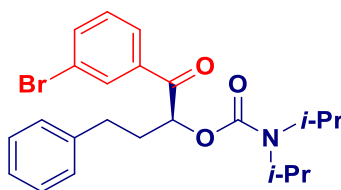

Synthesized according to **GP1** using **1** (0.077 g, 0.294 mmol, 1.5 equiv); (+)-sparteine (0.073 g, 0.313 mmol, 1.6 equiv); *s*-BuLi 1.4 M (0.022 mL, 0.313 mmol, 1.6 equiv) in CPME (2 mL); and 3-bromo-*N*-methoxy-*N*-methylbenzamide (0.048 g, 0.196 mmol, 1.0 equiv) dissolved in CPME (1 mL); compound **(S)-3** was obtained in 87% yield (0.076 g) as a white solid; mp 75-82 °C. Reaction run in larger scale starting from **1** (1.58 g, 6 mmol, 1.5 equiv); (+)-sparteine (1.5 g, 6.4 mmol, 1.6 equiv); *s*-BuLi 1.4 M (4.57 mL, 6.4 mmol, 1.6 equiv) and 3-bromo-*N*-methoxy-*N*-methylbenzamide (0.972 g, 4 mmol, 1.0 equiv) in CPME (27 mL) allowed to recover CPME (85%, 23 mL) and prepare **(S)-3** in comparable yield (83%, 1.48 g). The organic layer from the basic extraction with CPME (30 mL) afforded upon distillation (+)-sparteine (83%, 1.25 g, 1.22 mL), *N*-methyl-*N*-methoxyamine (75%, 3.0 mmol, 0.23 mL) and CPME (92%, 25.8 mL).

$[\alpha]_D^{+14}$  (c 0.5, CHCl<sub>3</sub>).

**HPLC analysis:** Chiralpak IA Column,  $\lambda$  250 nm, eluent: *n*-hexane / *i*-propanol 80/20. Flow: 1 mL/min

**Racemate**

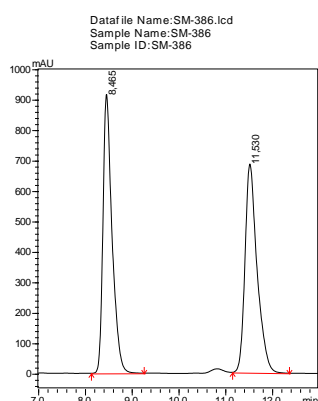

| Peaks | Retention time (min) | Area     | Area%   |
|-------|----------------------|----------|---------|
| 1     | 8,465                | 12371983 | 50,205  |
| 2     | 11,530               | 12270746 | 49,795  |
| Total |                      | 24642729 | 100,000 |

### Enantioenriched (S)-3

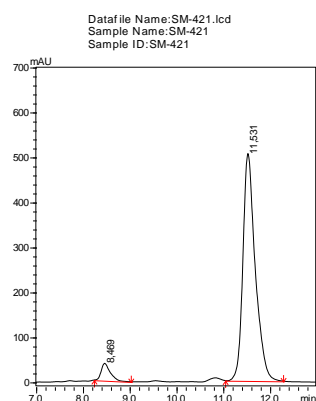

| Peaks | Retention time (min) | Area    | Area%   |
|-------|----------------------|---------|---------|
| 1     | 8,469                | 503918  | 5,159   |
| 2     | 11,531               | 9264670 | 94,841  |
| Total |                      | 9768588 | 100,000 |

### (R)-1-Oxo-1,4-diphenyl-2-butanyl diisopropylcarbamate, ((R)-4)

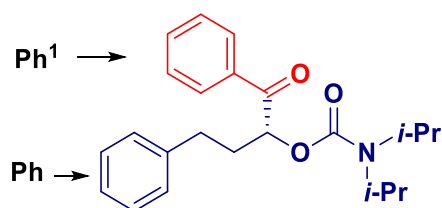

Synthesized according to **GP1** using **1** (0.077g, 0.294 mmol, 1.5 equiv); (-)-sparteine (0.073 g, 0.313 mmol, 1.6 equiv); *s*-BuLi 1.4 M (0.022 mL, 0.313 mmol, 1.6 equiv) in CPME (2 mL); and *N*-methoxy-*N*-methylbenzamide (0.032 g, 0.196 mmol, 1.0 equiv) dissolved in CPME (1 mL); compound **(R)-4** was obtained in 90% yield (0.065 g) as a white solid; mp 91-94 °C.

<sup>1</sup>H NMR (400 MHz, CDCl<sub>3</sub>): δ 7.86 (m, 2H, Ph<sup>1</sup> H-2,6), 7.54 (m, 1H, Ph<sup>1</sup> H-4), 7.42 (m, 2H, Ph<sup>1</sup> H-3,5), 7.29 (m, 2H, Ph H-3,5), 7.21 (m, 1H, Ph H-4), 7.17 (m, 2H, Ph H-2,6), 5.92 (dd, *J* = 7.6 Hz, 4.8 Hz, 1H, CHC=O), 4.06 (br s, 1H, CHCH<sub>3</sub>), 3.87 (br s, 1H, CHCH<sub>3</sub>), 2.75-2.89 (m, 2H, PhCH<sub>2</sub>), 2.14-2.21 (m, 2H, CH<sub>2</sub>CH), 1.34 (br, 6H, CH<sub>3</sub>), 1.22 (br, 6H, CH<sub>3</sub>).

<sup>13</sup>C NMR (100 MHz, CDCl<sub>3</sub>): δ 197.6 (PhC=O), 154.9 (NC=O), 140.8 (Ph C-1), 135.1 (Ph<sup>1</sup> C-1), 133.2 (Ph<sup>1</sup> C-4), 128.6 (Ph<sup>1</sup> C-3,5), 128.5 (Ph C-3,5), 128.40 (Ph C-2,6), 128.36 (Ph<sup>1</sup> C-2,6), 126.2 (Ph C-4), 74.5 (CHC=O), 46.7 (CHCH<sub>3</sub>), 45.6 (CHCH<sub>3</sub>), 33.1 (CH<sub>2</sub>CH), 31.9 (PhCH<sub>2</sub>), 21.8 (CH<sub>3</sub> via HSQC), 21.4 (CH<sub>3</sub> via HSQC), 20.5 (CH<sub>3</sub> br).

HRMS (ESI),  $m/z$ : calcd. for  $C_{23}H_{29}NNaO_3$  390.2040[M+Na]<sup>+</sup>; found 390.2045.

$[\alpha]_D$  -56 (c 0.5, CHCl<sub>3</sub>).

HPLC analysis: Chiralpak IA Column,  $\lambda$  250 nm, eluent: *n*-hexane / *i*-propanol 80/20. Flow:

1 mL/min

### Racemate

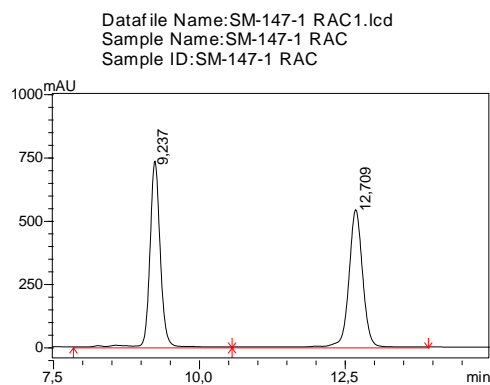

| Peaks | Retention time (min) | Area     | Area%   |
|-------|----------------------|----------|---------|
| 1     | 9,237                | 8970193  | 50,564  |
| 2     | 12,709               | 8770233  | 49,436  |
| Total |                      | 17740426 | 100,000 |

### Enantioenriched (R)-4

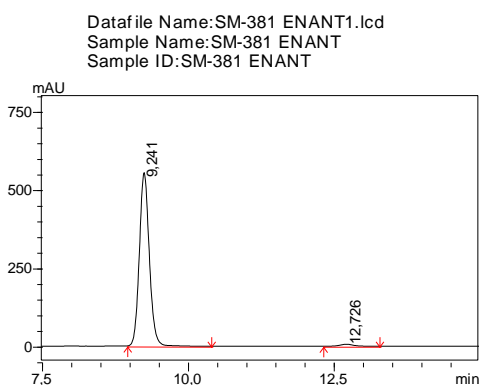

| Peaks | Retention time (min) | Area    | Area%   |
|-------|----------------------|---------|---------|
| 1     | 9,241                | 6558728 | 98,624  |
| 2     | 12,726               | 91509   | 1,376   |
| Total |                      | 6650238 | 100,000 |

**(R)-1-(3-Chlorophenyl)-1-oxo-4-phenyl-2-butanyl diisopropylcarbamate, ((R)-5)**

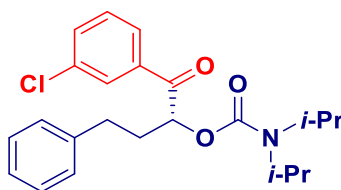

Synthesized according to **GP1** using **1** (0.077 g, 0.294 mmol, 1.5 equiv); (-)-sparteine (0.073 g, 0.313 mmol, 1.6 equiv); *s*-BuLi 1.4 M (0.022 mL, 0.313 mmol, 1.6 equiv) in CPME (2 mL); and 3-chloro-*N*-methoxy-*N*-methylbenzamide (0.039 g, 0.196 mmol, 1.0 equiv) dissolved in CPME (1 mL); compound **(R)-5** was obtained in 89% yield (0.070 g) as a white solid; mp 70-74 °C. Reaction run in larger scale starting from **1** (1.58 g, 6 mmol, 1.5 equiv); (-)-sparteine (1.5 g, 6.4 mmol, 1.6 equiv); *s*-BuLi 1.4 M (4.57 mL, 6.4 mmol, 1.6 equiv) and 3-chloro-*N*-methoxy-*N*-methylbenzamide (0.796 g, 4 mmol, 1.0 equiv) in CPME (27 mL) allowed to recover CPME (85%, 24.3 mL) and prepare **(R)-5** in comparable yield (85%, 1.36 g). The organic layer from the basic extraction with CPME (30 mL) afforded upon distillation (-)-sparteine (81%, 1.21 g, 1.19 mL), *N*-methyl-*N*-methoxyamine (77%, 3.1 mmol, 0.24 mL) and CPME (94%, 28.2 mL).

<sup>1</sup>H NMR (400 MHz, CDCl<sub>3</sub>): δ 7.82 (m, 1H, *m*-Cl Ph H-2), 7.71 (m, 1H, *m*-Cl Ph H-6), 7.50 (m, 1H, *m*-Cl Ph H-4), 7.35 (m, 1H, *m*-Cl Ph H-5), 7.30 (m, 2H, Ph H-3,5), 7.22 (m, 1H, Ph H-4), 7.18 (m, 2H, Ph H-2,6), 5.77 (m, 1H, CHC=O), 4.02 (br s, 1H, CHCH<sub>3</sub>), 3.87 (br s, 1H, CHCH<sub>3</sub>), 2.74-2.90 (m, 2H, PhCH<sub>2</sub>), 2.13-2.20 (m, 2H, CH<sub>2</sub>CH), 1.33 (br s, 6H, CH<sub>3</sub>), 1.20 (br s, 6H, CH<sub>3</sub>).

<sup>13</sup>C NMR (100 MHz, CDCl<sub>3</sub>): δ 196.6 (PhC=O), 154.7 (NC=O), 140.5 (Ph C-1), 136.6 (*m*-Cl Ph C-1), 134.9 (*m*-Cl Ph C-3), 133.4 (*m*-Cl Ph C-4), 130.0 (*m*-Cl Ph C-5), 128.6 (Ph C-3,5), 128.44 (*m*-Cl Ph C-2), 128.39 (Ph C-2,6), 126.4 (*m*-Cl Ph C-6), 126.3 (Ph C-4), 74.5 (CHC=O), 46.7 (CHCH<sub>3</sub>), 45.7 (CHCH<sub>3</sub>), 32.9 (CH<sub>2</sub>CH), 31.8 (PhCH<sub>2</sub>), 21.8 (CH<sub>3</sub> br), 21.4 (CH<sub>3</sub> br), 20.5 (CH<sub>3</sub> br).

HRMS (ESI), *m/z*: calcd. for C<sub>23</sub>H<sub>28</sub>ClNNaO<sub>3</sub> 424.1650 [M+Na]<sup>+</sup>; found 424.1650.

[α]<sub>D</sub> -42 (c 0.5, CHCl<sub>3</sub>).

HPLC analysis: Chiralpak IA Column, λ 250 nm, eluent: *n*-hexane / *i*-propanol 80/20. Flow: 1 mL/min

**Racemate**

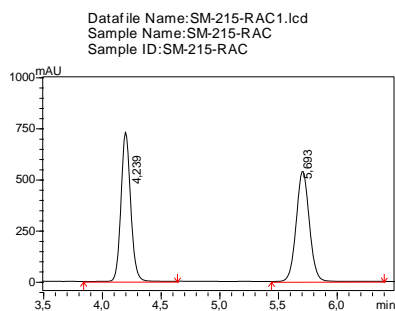

| Peaks | Retention time (min) | Area    | Area%   |
|-------|----------------------|---------|---------|
| 1     | 4,239                | 4175534 | 49,872  |
| 2     | 5,693                | 4197049 | 50,128  |
| Total |                      | 8372583 | 100,000 |

### Enantioenriched (R)-5

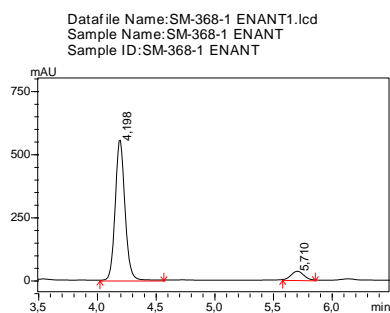

| Peaks | Retention time (min) | Area    | Area%   |
|-------|----------------------|---------|---------|
| 1     | 4,198                | 3192526 | 92,849  |
| 2     | 5,710                | 245864  | 7,151   |
| Total |                      | 3438390 | 100,000 |

### (R)-1-(2-Fluorophenyl)-1-oxo-4-phenyl-2-butanyl diisopropylcarbamate, ((R)-6)

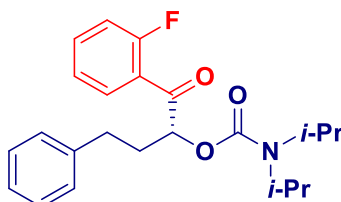

Synthesized according to **GP1** using **1** (0.077 g, 0.294 mmol, 1.5 equiv); (-)-sparteine (0.073 g, 0.313 mmol, 1.6 equiv); *s*-BuLi 1.4 M (0.022 mL, 0.313 mmol, 1.6 equiv) in CPME (2 mL); and 2-fluoro-*N*-

methoxy-*N*-methylbenzamide (0.036 g, 0.196 mmol, 1.0 equiv) dissolved in CPME (1 mL); compound **(R)-6** was obtained in 85% yield (0.064 g) as a white solid; mp 85-87 °C.

<sup>1</sup>H NMR (400 MHz, CDCl<sub>3</sub>): δ 7.87 (ddd, *J* = 7.9 Hz, 1.8 Hz, <sup>4</sup>*J*<sub>H,F</sub> = 7.1 Hz, 1H, *o*-F Ph H-6), 7.51 (dddd, *J* = 8.3 Hz, 7.3 Hz, 1.8 Hz, <sup>4</sup>*J*<sub>H,F</sub> = 5.1 Hz, 1H, *o*-F Ph H-4), 7.28 (m, 2H, Ph H-3,5), 7.22 (ddd, *J* = 7.9 Hz, 7.3 Hz, 1.8 Hz, 1H, *o*-F Ph H-5), 7.19 (m, 1H, Ph H-4), 7.17 (m, 2H, Ph H-2,6), 7.12 (ddd, <sup>3</sup>*J*<sub>H,F</sub> = 11.1 Hz, *J* = 8.3 Hz, 1.0 Hz, 1H, *o*-F Ph H-3), 5.79 (ddd, *J* = 8.7 Hz, 3.5 Hz, *J*<sub>H,F</sub> = 1.3 Hz, 1H, CHC=O), 4.03 (br s, 1H, CHCH<sub>3</sub>), 3.87 (br s, 1H, CHCH<sub>3</sub>), 2.84 (m, 2H, PhCH<sub>2</sub>), 2.22 (m, 1H, CH<sub>2</sub>CH), 2.11 (m, 1H, CH<sub>2</sub>CH), 1.33 (br s, 6H, CH<sub>3</sub>), 1.21 (br s, 6H, CH<sub>3</sub>).

<sup>13</sup>C NMR (100 MHz, CDCl<sub>3</sub>): δ 195.0 (d, *J* = 4.6 Hz, *o*-F PhC=O), 161.2 (d, *J* = 254.4 Hz, *o*-F Ph C-2), 154.8 (NC=O), 140.9 (Ph C-1), 134.6 (d, *J* = 9.0 Hz, *o*-F Ph C-4), 131.3 (d, *J* = 2.9 Hz, *o*-F Ph C-6), 128.4 (Ph C-3,5), 128.3 (Ph C-2,6), 126.1 (Ph C-4), 124.6 (d, *J* = 3.3 Hz, *o*-F Ph C-5), 123.8 (d, *J* = 13.9 Hz, *o*-F Ph C-1), 116.5 (d, *J* = 23.7 Hz, *o*-F Ph C-3), 78.0 (d, *J* = 7.7 Hz, CHC=O), 46.6 (br CHCH<sub>3</sub>), 45.6 (br CHCH<sub>3</sub>), 32.36 (d, *J* = 1.5 Hz, CH<sub>2</sub>CH), 32.29 (PhCH<sub>2</sub>), 21.7 (br, CH<sub>3</sub>), 21.3 (br, CH<sub>3</sub>), 20.5 (br, 2×CH<sub>3</sub>).

<sup>19</sup>F NMR (376 MHz, CDCl<sub>3</sub>): δ -108.8 (m).

HRMS (ESI), *m/z*: calcd. for C<sub>23</sub>H<sub>29</sub>FNO<sub>3</sub> 386.2126 [M+H]<sup>+</sup>; found 386.2128.

[α]<sub>D</sub>-39 (c 0.5, CHCl<sub>3</sub>).

HPLC analysis: Chiralpak IA Column, λ 250 nm, eluent: *n*-hexane / *i*-propanol 80/20. Flow: 1 mL/min

### Racemate

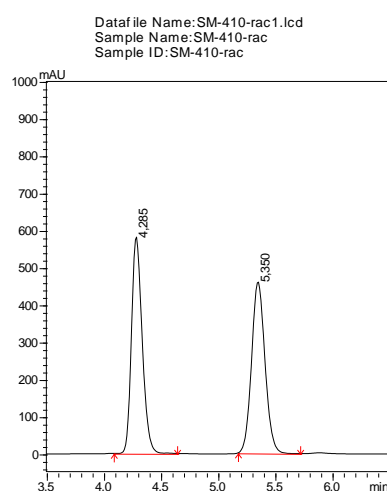

| Peaks | Retention time (min) | Area    | Area%  |
|-------|----------------------|---------|--------|
| 1     | 4,285                | 3778060 | 50,143 |
| 2     | 5,350                | 3756581 | 49,857 |



|       |  |         |         |
|-------|--|---------|---------|
| Total |  | 7534642 | 100,000 |
|-------|--|---------|---------|

### Enantioenriched (R)-6

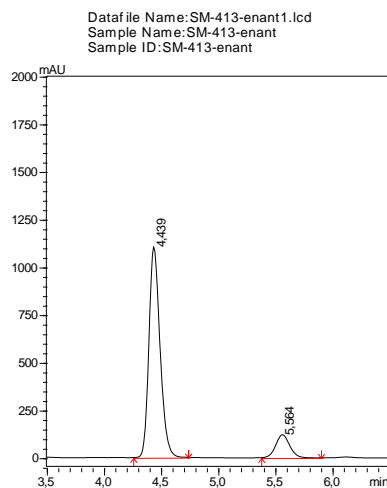

| Peaks | Retention time (min) | Area    | Area%   |
|-------|----------------------|---------|---------|
| 1     | 4,439                | 7463243 | 87,988  |
| 2     | 5,564                | 1018858 | 12,012  |
| Total |                      | 8482101 | 100,000 |

### (R)-1-(3-Fluorophenyl)-1-oxo-4-phenyl-2-butanyl diisopropylcarbamate, ((R)-7)

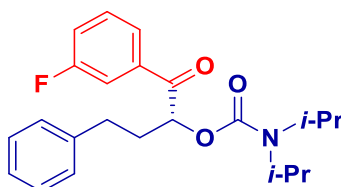

Synthesized according to **GP1** using **1** (0.077 g, 0.294 mmol, 1.5 equiv); (-)-sparteine (0.073 g, 0.313 mmol, 1.6 equiv); *s*-BuLi 1.4 M (0.022 mL, 0.313 mmol, 1.6 equiv) in CPME (2 mL); and 3-fluoro-*N*-methoxy-*N*-methylbenzamide (0.036 g, 0.196 mmol, 1.0 equiv) dissolved in CPME (1 mL); compound **(R)-7** was obtained in 91% yield (0.069 g) as a white solid; mp 57-60 °C. Reaction run with (-)-sparteine recovered from preparation of **(R)-5**.

<sup>1</sup>H NMR (400 MHz, CDCl<sub>3</sub>): δ 7.62 (m, 1H, *m*-F Ph H-6), 7.55 (m, 1H, *m*-F Ph H-2), 7.39 (m, 1H, *m*-F Ph H-5), 7.30 (m, 2H, Ph H-3,5), 7.24 (m, 1H, *m*-F Ph H-4), 7.22 (m, 1H, Ph H-4), 7.17 (m, 2H, Ph H-2,6), 5.80 (m, 1H, CHC=O), 4.03 (br s, 1H, CHCH<sub>3</sub>), 3.86 (br s, 1H, CHCH<sub>3</sub>), 2.84 (m, 1H, PhCH<sub>2</sub>), 2.80 (m, 1H, PhCH<sub>2</sub>), 2.18 (m, 1H, CH<sub>2</sub>CH), 2.15 (m, 1H, CH<sub>2</sub>CH), 1.33 (br, 6H, CH<sub>3</sub>), 1.20 (br, 6H, CH<sub>3</sub>).

**<sup>13</sup>C NMR** (100 MHz, CDCl<sub>3</sub>): δ 196.5 (d, <sup>4</sup>J = 2.2 Hz, PhC=O), 162.8 (d, <sup>1</sup>J = 248.1 Hz, *m*-F Ph C-3), 154.7 (NC=O), 140.5 (Ph C-1), 137.1 (d, <sup>3</sup>J = 6.3 Hz, *m*-F Ph C-1), 130.3 (d, <sup>3</sup>J = 7.7 Hz, *m*-F Ph C-5), 128.6 (Ph C-3,5), 128.4 (Ph C-2,6), 126.3 (Ph C-4), 124.1 (d, <sup>4</sup>J = 3.1 Hz, *m*-F Ph C-6), 120.2 (d, <sup>2</sup>J = 21.5 Hz, *m*-F Ph C-4), 115.2 (d, <sup>2</sup>J = 22.6 Hz, *m*-F Ph C-2), 74.5 (CHC=O), 46.8 CHCH<sub>3</sub>, 45.7 CHCH<sub>3</sub>, 33.0 (CH<sub>2</sub>CH), 31.9 (PhCH<sub>2</sub>), 22.0-20.0 (CH<sub>3</sub>).

**<sup>19</sup>F NMR** (376 MHz, CDCl<sub>3</sub>): δ -111.6 (m).

**HRMS** (ESI), *m/z*: calcd. for C<sub>23</sub>H<sub>28</sub>FNNaO<sub>3</sub> 408.1945 [M+Na]<sup>+</sup>; found 408.1951

[α]<sub>D</sub> -76 (c 0.5, CHCl<sub>3</sub>).

**HPLC analysis:** Chiralpak IA Column, λ 250 nm, eluent: *n*-hexane / *i*-propanol 80/20. Flow: 1 mL/min

### Racemate

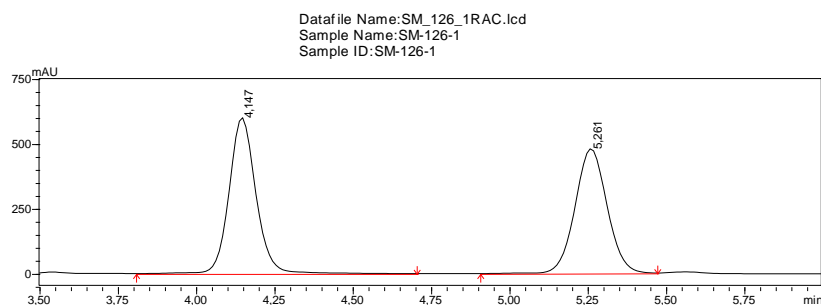

| Peaks | Retention time (min) | Area    | Area%   |
|-------|----------------------|---------|---------|
| 1     | 4,147                | 3582812 | 51,322  |
| 2     | 5,261                | 3398295 | 48,678  |
| total |                      | 6981108 | 100,000 |

### Enantioenriched (R)-7

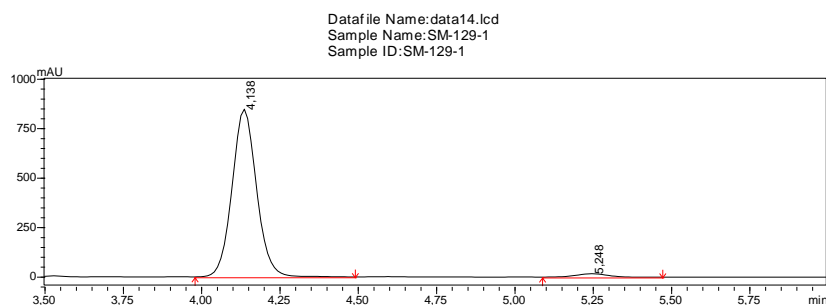

| Peaks | Retention time (min) | Area | Area% |
|-------|----------------------|------|-------|
| 1     | 4,138                |      |       |
| 2     | 5,248                |      |       |

|       |       |         |         |
|-------|-------|---------|---------|
| 1     | 4,138 | 4606403 | 97,532  |
| 2     | 5,248 | 116582  | 2,468   |
| total |       | 4722985 | 100,000 |

**(R)-1-[4-(2-Methyl-2-propanyl)phenyl]-1-oxo-4-phenyl-2-butanyl diisopropylcarbamate ((R)-8)**

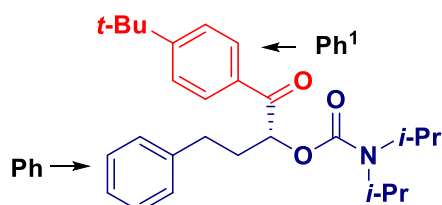

Synthesized according to **GP1** using **1** (0.077 g, 0.294 mmol, 1.5 equiv); (-)-sparteine (0.073 g, 0.313 mmol, 1.6 equiv); *s*-BuLi 1.4 M (0.022 mL, 0.313 mmol, 1.6 equiv) in CPME (2 mL); and 4-(tert-butyl)-*N*-methoxy-*N*-methyl-benzamide (0.043 g, 0.196 mmol, 1.0 equiv) dissolved in CPME (1 mL); compound **(R)-8** was obtained in 95% yield (0.079 g) as a white solid; mp 70-74 °C. Reaction run in larger scale starting from **1** (1.58 g, 6 mmol, 1.5 equiv); (-)-sparteine (1.5 g, 6.4 mmol, 1.6 equiv); *s*-BuLi 1.4 M (4.57 mL, 6.4 mmol, 1.6 equiv) and 4-(tert-butyl)-*N*-methoxy-*N*-methyl-benzamide (0.885 g, 4 mmol, 1.0 equiv) in CPME (27 mL) allowed to recover CPME (89%, 24.0 mL) and prepare **(R)-8** in comparable yield (89%, 1.51 g). The organic layer from the basic extraction with CPME (30 mL) afforded upon distillation (-)-sparteine (83%, 1.24 g, 1.22 mL), *N*-methyl-*N*-methoxyamine (70%, 2.8 mmol, 0.21 mL) and CPME (90%, 27.0 mL).

<sup>1</sup>H NMR (400 MHz, CDCl<sub>3</sub>): δ 7.81 (m, 2H, Ph<sup>1</sup> H-2,6), 7.43 (m, 2H, Ph<sup>1</sup> H-3,5), 7.29 (m, 2H, Ph H-3,5), 7.20 (m, 1H, Ph H-4), 7.17 (m, 2H, Ph H-2,6), 5.91 (dd, *J* = 8.0 Hz, 4.6 Hz, 1H, CHC=O), 4.06 (br s, 1H, CHCH<sub>3</sub>), 3.86 (br s, 1H, CHCH<sub>3</sub>), 2.75-2.89 (m, 2H, PhCH<sub>2</sub>), 2.13-2.22 (m, 2H, CH<sub>2</sub>CH), 1.34-1.21 (br, 12H, CH<sub>3</sub>), 1.32 (s, 9H, C(CH<sub>3</sub>)<sub>3</sub>).

<sup>13</sup>C NMR (100 MHz, CDCl<sub>3</sub>): δ 197.2 (PhC=O), 157.0 (Ph<sup>1</sup> C-4), 154.9 (NC=O), 140.9 (Ph C-1), 132.3 (Ph<sup>1</sup> C-1), 128.5 (Ph C-3,5), 128.4 (Ph C-2,6), 128.3 (Ph<sup>1</sup> C-2,6), 126.2 (Ph C-4), 125.6 (Ph<sup>1</sup> C-3,5), 74.4 (CHC=O), 46.6 (CHCH<sub>3</sub>), 45.6 (CHCH<sub>3</sub>), 35.1 (C(CH<sub>3</sub>)<sub>3</sub>), 33.2 (CH<sub>2</sub>CH), 32.0 (PhCH<sub>2</sub>), 31.0 (C(CH<sub>3</sub>)<sub>3</sub>), 21.7 (CH<sub>3</sub>), 21.4 (CH<sub>3</sub>), 20.5 (CH<sub>3</sub>).

**HRMS** (ESI), *m/z*: calcd. for C<sub>27</sub>H<sub>38</sub>NO<sub>3</sub> 424.2846 [M+H]<sup>+</sup>; found 424.2854.

[α]<sub>D</sub> -17 (c 0.5, CHCl<sub>3</sub>).

**HPLC analysis**: Chiralpak IA Column, λ 250 nm, eluent: *n*-hexane / *i*-propanol 80/20. Flow: 1 mL/min

## Racemate

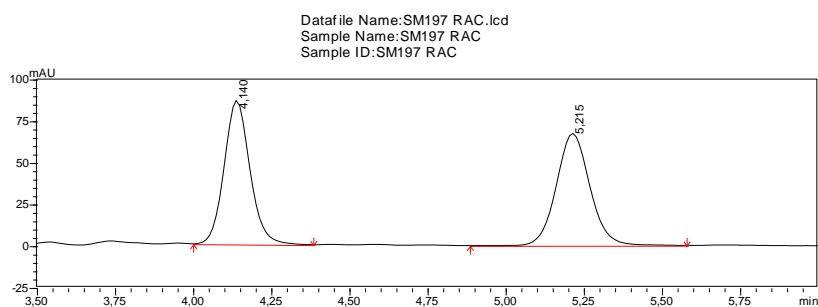

| Peaks | Retention time (min) | Area   | Area%   |
|-------|----------------------|--------|---------|
| 1     | 4,140                | 493830 | 49,575  |
| 2     | 5,215                | 502306 | 50,425  |
| Total |                      | 996136 | 100,000 |

## Enantioenriched (R)-8

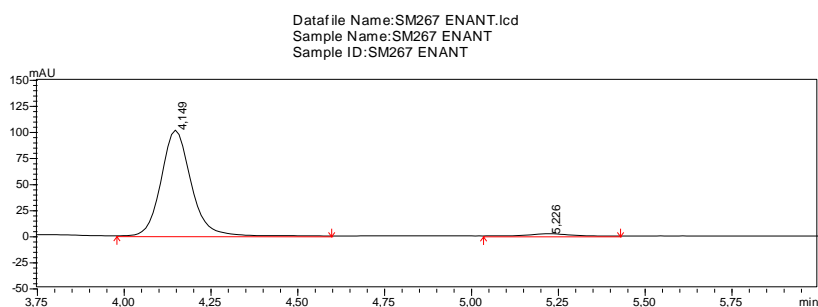

| Peaks | Retention time (min) | Area   | Area%   |
|-------|----------------------|--------|---------|
| 1     | 4,149                | 602309 | 97,519  |
| 2     | 5,226                | 15327  | 2,481   |
| Total |                      | 617636 | 100,000 |

## (R)-1-(4-Biphenyl)-1-oxo-4-phenyl-2-butanyl diisopropylcarbamate, ((R)-9)

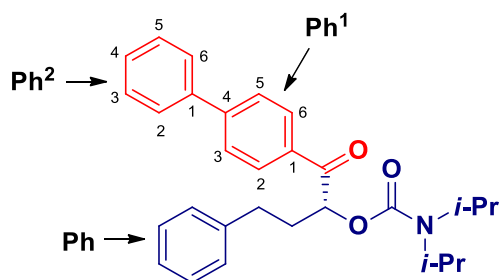

Synthesized according to **GP1** using **1** (0.077 g, 0.294 mmol, 1.5 equiv); (-)-sparteine (0.073 g, 0.313 mmol, 1.6 equiv); *s*-BuLi 1.4 M (0.022 mL, 0.313 mmol, 1.6 equiv) in CPME (2 mL); and *N*-methoxy-*N*-methyl-4-biphenylcarboxamide (0.047 g, 0.196 mmol, 1.0 equiv) dissolved in CPME (1 mL); compound **(R)-9** was obtained in 92% yield (0.080g) as a white solid; mp 132-135 °C.

<sup>1</sup>H NMR (400 MHz, CDCl<sub>3</sub>): δ 7.94 (m, 2H, Ph<sup>1</sup> H-2,6), 7.64 (m, 2H, Ph<sup>1</sup> H-3,5), 7.61 (m, 2H, Ph<sup>2</sup> H-2,6), 7.47 (m, 2H, Ph<sup>2</sup> H-3,5), 7.40 (m, 1H, Ph<sup>2</sup> H-4), 7.30 (m, 2H, Ph H-3,5), 7.22 (m, 1H, Ph H-4), 7.19 (m, 2H, Ph H-2,6), 5.94 (dd, *J* = 7.5 Hz, 5.1 Hz, 1H, CHC=O), 4.06 (br s, 1H, CHCH<sub>3</sub>), 3.88 (br s, 1H, CHCH<sub>3</sub>), 2.76-2.92 (m, 2H, PhCH<sub>2</sub>), 2.15-2.27 (m, 2H, CH<sub>2</sub>CH), 1.35 (br s, 6H, CH<sub>3</sub>), 1.22 (br s, 6H, CH<sub>3</sub>).

<sup>13</sup>C NMR (100 MHz, CDCl<sub>3</sub>): δ 197.2 (PhC=O), 154.9 (NC=O), 145.9 (Ph<sup>1</sup> C-4), 140.8 (Ph C-1), 139.9 (Ph<sup>2</sup> C-1), 133.7 (Ph<sup>1</sup> C-1), 129.0 (Ph<sup>1</sup> C-2,6), 128.9 (Ph<sup>2</sup> C-3,5), 128.6 (Ph C-3,5), 128.4 (Ph C-2,6), 128.2 (Ph<sup>2</sup> C-4), 127.3 (Ph<sup>1</sup> C-3,5), 127.3 (Ph<sup>2</sup> C-2,6), 126.2 (Ph C-4), 74.4 (CHC=O), 46.7 (CHCH<sub>3</sub>), 45.7 (CHCH<sub>3</sub>), 33.2 (CH<sub>2</sub>CH), 32.0 (PhCH<sub>2</sub>), 21.9 (CH<sub>3</sub> br s), 21.4 (CH<sub>3</sub> br s), 20.5 (CH<sub>3</sub> br s).

HRMS (ESI), *m/z*: calcd. for C<sub>29</sub>H<sub>34</sub>NO<sub>3</sub> 444.2533 [M+H]; found 444.2536.

[α]<sub>D</sub> -69 (c 0.5, CHCl<sub>3</sub>).

HPLC analysis: Chiralpak IA Column, λ 250 nm, eluent: *n*-hexane / *i*-propanol 80/20. Flow: 1 mL/min

### Racemate

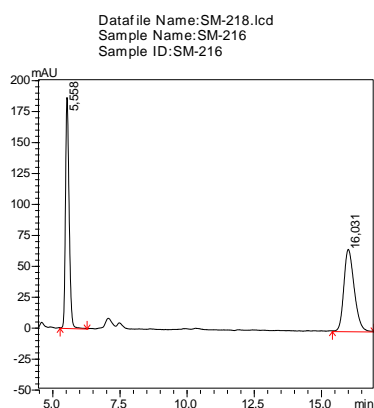

| Peaks | Retention time (min) | Area    | Area%   |
|-------|----------------------|---------|---------|
| 1     | 5,558                | 1727879 | 49,916  |
| 2     | 16,031               | 1733678 | 50,084  |
| Total |                      | 3461556 | 100,000 |

## Enantioenriched (*R*)-9

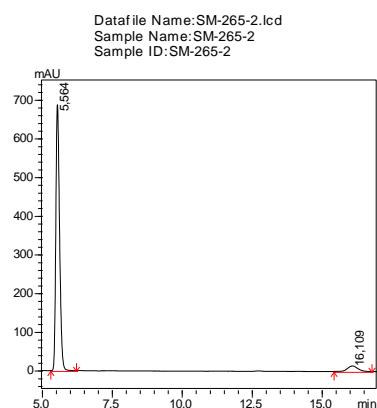

| Peaks | Retention time (min) | Area    | Area%   |
|-------|----------------------|---------|---------|
| 1     | 5,564                | 6393887 | 94,571  |
| 2     | 16,109               | 367067  | 5,429   |
| Total |                      | 6760955 | 100,000 |

## (*S*)-1-(4-Biphenyl)-1-oxo-4-phenyl-2-butanyl diisopropylcarbamate, ((*S*)-9)

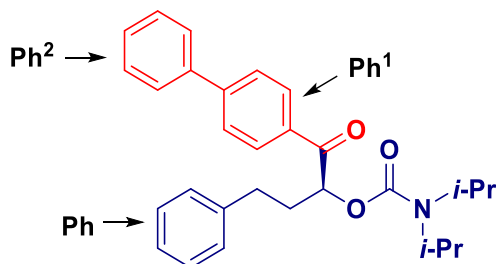

Synthesized according to **GP1** using **1** (0.077 g, 0.294 mmol, 1.5 equiv); (+)-sparteine (0.073 g, 0.313 mmol, 1.6 equiv); *s*-BuLi 1.4 M (0.022 mL, 0.313 mmol, 1.6 equiv) in CPME (2 mL); and *N*-methoxy-*N*-methyl-4-biphenylcarboxamide (0.047 g, 0.196 mmol, 1.0 equiv) dissolved in CPME (1 mL); compound (**S**)-9 was obtained in 88% yield (0.076 g) as a white solid; mp 132-135 °C. Reaction run with (+)-sparteine recovered from preparation of (**S**)-3.

$[\alpha]_D^{+65}$  (c 0.5, CHCl<sub>3</sub>).

**HPLC analysis:** Chiralpak IA Column, λ 250 nm, eluent: *n*-hexane / *i*-propanol 80/20. Flow: 1 mL/min

**Racemate**

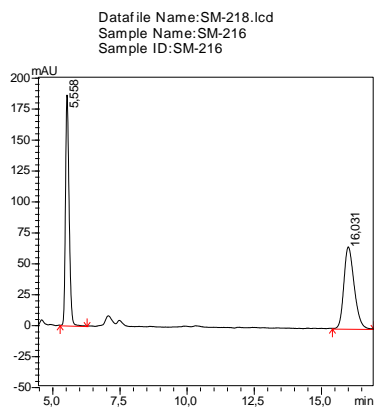

| Peaks | Retention time (min) | Area    | Area%   |
|-------|----------------------|---------|---------|
| 1     | 5,558                | 1727879 | 49,916  |
| 2     | 16,031               | 1733678 | 50,084  |
| Total |                      | 3461556 | 100,000 |

**Enantioenriched (S)-9**

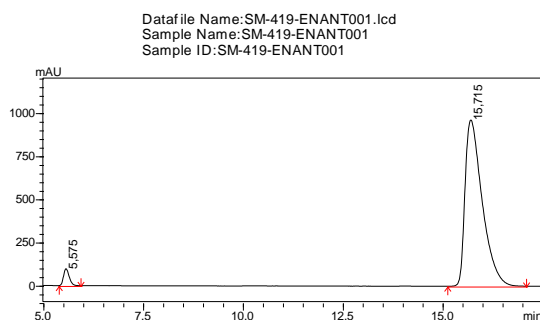

| Peaks | Retention time (min) | Area     | Area%   |
|-------|----------------------|----------|---------|
| 1     | 5,575                | 964729   | 3,245   |
| 2     | 15,715               | 28761124 | 96,755  |
| Total |                      | 29725853 | 100,000 |

**(R)-1-(4-Methoxyphenyl)-1-oxo-4-phenyl-2-butanyl diisopropylcarbamate, ((R)-10)**

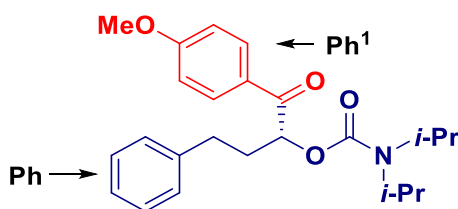

Synthesized according to **GP1** using **1** (0.077 g, 0.294 mmol, 1.5 equiv); (-)-sparteine (0.073 g, 0.313 mmol, 1.6 equiv); *s*-BuLi 1.4 M (0.022 mL, 0.313 mmol, 1.6 equiv) in CPME (2 mL); and *N*,4-dimethoxy-*N*-methylbenzamide (0.038 g, 0.196 mmol, 1.0 equiv) dissolved in CPME (1 mL); compound **(R)-10** was obtained in 81% yield (0.063 g) as a white solid; mp 77-80 °C. Reaction run with (-)-sparteine recovered from preparation of **(R)-8**.

<sup>1</sup>H NMR (400 MHz, CDCl<sub>3</sub>): δ 7.85 (m, 2H, Ph<sup>1</sup> H-2,6), 7.29 (m, 2H, Ph H-3,5), 7.20 (m, 1H, Ph H-4), 7.17 (m, 2H, Ph H-2,6), 6.89 (m, 2H, Ph<sup>1</sup> H-3,5), 5.90 (m, 1H, CHC=O), 4.07 (br s, 1H, CHCH<sub>3</sub>), 3.86 (br s, 1H, CHCH<sub>3</sub>), 3.85 (s, 3H, OCH<sub>3</sub>), 2.74-2.88 (m, 2H, PhCH<sub>2</sub>), 2.13-2.20 (m, 2H, CH<sub>2</sub>CH), 1.34-1.21 (br, 12H, CH<sub>3</sub>).

<sup>13</sup>C NMR (100 MHz, CDCl<sub>3</sub>): δ 195.9 (PhC=O), 163.6 (Ph<sup>1</sup> C-4), 154.9 (NC=O), 140.8 (Ph C-1), 130.7 (Ph<sup>1</sup> C-2,6), 128.5 (Ph C-3,5), 128.4 (Ph C-2,6), 127.9 (Ph<sup>1</sup> C-1), 126.1 (Ph C-4), 113.8 (Ph<sup>1</sup> C-3,5), 74.1 (CHC=O), 55.4 (OCH<sub>3</sub>), 46.6 (CHCH<sub>3</sub>), 45.6 (CHCH<sub>3</sub>), 33.4 (CH<sub>2</sub>CH), 31.9 (PhCH<sub>2</sub>), 21.8 (CH<sub>3</sub>), 21.3 (CH<sub>3</sub>), 20.5 (CH<sub>3</sub>).

HRMS (ESI), *m/z*: calcd. for C<sub>24</sub>H<sub>32</sub>NO<sub>4</sub> 398.2326 [M+H]<sup>+</sup>; found 398.2330.

[α]<sub>D</sub>-73 (c 0.5, CHCl<sub>3</sub>).

HPLC analysis: Chiralpak IA Column, λ 250 nm, eluent: *n*-hexane / *i*-propanol 80/20. Flow: 1 mL/min

### Racemate

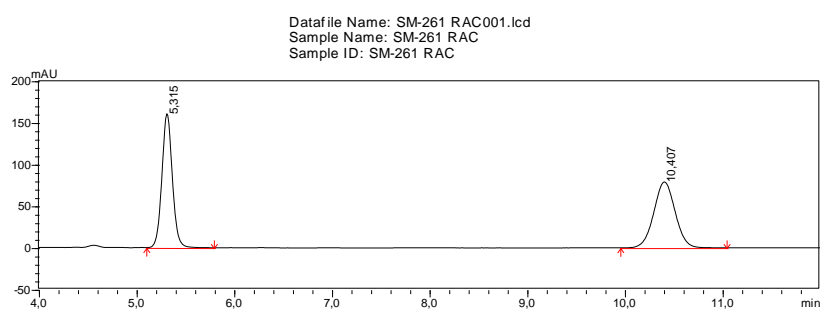

| Peaks | Retention time (min) | Area    | Area%   |
|-------|----------------------|---------|---------|
| 1     | 5,315                | 1195643 | 49,879  |
| 2     | 10,407               | 1201452 | 50,121  |
| Total |                      | 2397095 | 100,000 |



## Enantioenriched (*R*)-10

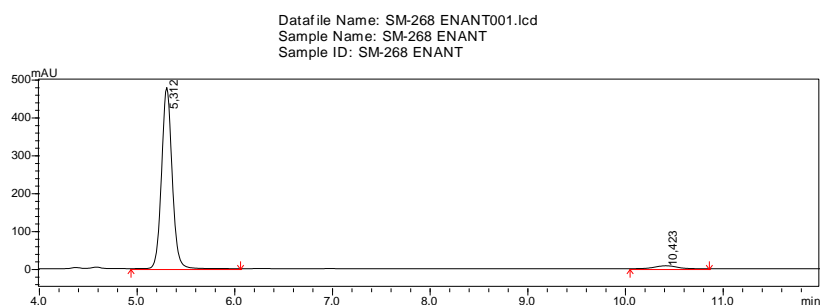

| Peaks | Retention time (min) | Area    | Area%   |
|-------|----------------------|---------|---------|
| 1     | 5,312                | 3595139 | 96,859  |
| 2     | 10,423               | 116568  | 3,141   |
| Total |                      | 3711707 | 100,000 |

## (*R*)-1-(2-Furyl)-1-oxo-4-phenyl-2-butanyl diisopropylcarbamate, ((*R*)-11)

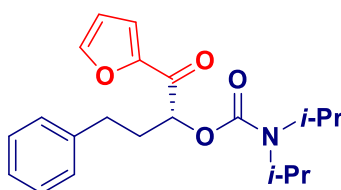

Synthesized according to **GP1** using **1** (0.077 g, 0.294 mmol, 1.5 equiv); (-)-sparteine (0.073 g, 0.313 mmol, 1.6 equiv); *s*-BuLi 1.4 M (0.022 mL, 0.313 mmol, 1.6 equiv) in CPME (2 mL); and *N*-methoxy-*N*-methyl-2-furamide (0.030 g, 0.196 mmol, 1.0 equiv) dissolved in CPME (1 mL); compound (**R**)-**11** was obtained in 85% yield (0.059 g) as a white solid; mp 147-150 °C.

<sup>1</sup>H NMR (400 MHz, CDCl<sub>3</sub>): δ 7.57 (m, dd, *J* = 1.7 Hz, 0.8 Hz, 1H, Furyl H-5), 7.29 (m, 2H, Ph H-3,5), 7.22 (m, 1H, Ph H-4), 7.17 (m, 2H, Ph H-2,6), 7.18 (m, dd, *J* = 3.6 Hz, 0.8 Hz, 1H, Furyl H-3), 6.51 (m, dd, *J* = 3.6 Hz, 1.7 Hz, 1H, Furyl H-4), 5.69 (m, 1H, CHC=O), 4.04 (br s, 1H, CHCH<sub>3</sub>), 3.87 (br s, 1H, CHCH<sub>3</sub>), 2.74-2.90 (m, 2H, PhCH<sub>2</sub>), 2.13-2.27 (m, 2H, CH<sub>2</sub>CH), 1.15-1.40 (2 br s, 12H, CH<sub>3</sub>).

<sup>13</sup>C NMR (100 MHz, CDCl<sub>3</sub>): δ 186.1 (Furyl C=O), 154.7 (NC=O), 150.8 (Furyl C-2), 146.6 (Furyl C-5), 140.8 (Ph C-1), 128.5 (Ph C-3,5), 128.4 (Ph C-2,6), 126.2 (Ph C-4), 118.1 (Furyl C-3), 112.2 (Furyl C-4), 74.7 (CHC=O), 46.7 (CHCH<sub>3</sub>), 45.6 (CHCH<sub>3</sub>), 33.1 (CH<sub>2</sub>CH), 31.8 (PhCH<sub>2</sub>), 21.8 (CH<sub>3</sub>), 21.4 (CH<sub>3</sub>), 20.4 (CH<sub>3</sub> 2x).

HRMS (ESI), *m/z*: calcd. for C<sub>21</sub>H<sub>28</sub>NO<sub>4</sub> 358.2013 [M+H]<sup>+</sup>; found 358.2014.

[α]<sub>D</sub> -110 (c 0.5, CHCl<sub>3</sub>).

HPLC analysis: Chiralpak IA Column,  $\lambda$  250 nm, eluent: *n*-hexane / *i*-propanol 80/20. Flow: 1 mL/min

**Racemate**

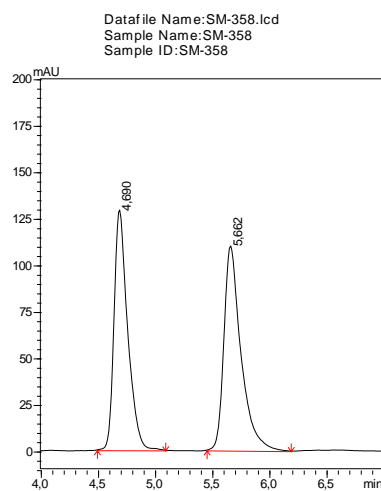

| Peaks | Retention time (min) | Area    | Area%   |
|-------|----------------------|---------|---------|
| 1     | 4,690                | 1067464 | 48,416  |
| 2     | 5,662                | 1137305 | 51,584  |
| Total |                      | 2204769 | 100,000 |

**Enantioenriched (R)-11**

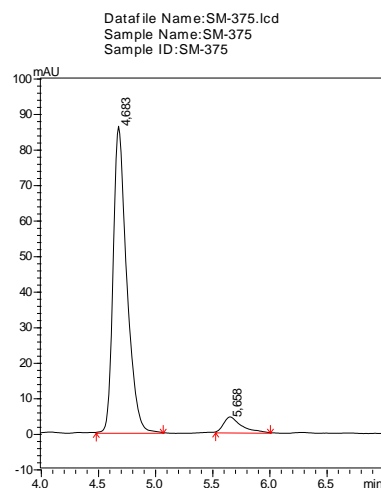

| Peaks | Retention time (min) | Area   | Area%   |
|-------|----------------------|--------|---------|
| 1     | 4,683                | 708800 | 94,039  |
| 2     | 5,658                | 44932  | 5,961   |
| Total |                      | 753733 | 100,000 |

**(S)-1-(2-Furyl)-1-oxo-4-phenyl-2-butanyl diisopropylcarbamate, ((S)-11)**

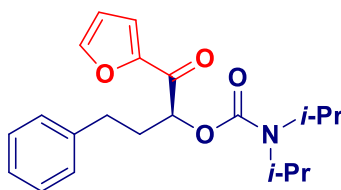

Synthesized according to **GP1** using **1** (0.077 g, 0.294 mmol, 1.5 equiv); (+)-sparteine (0.073 g, 0.313 mmol, 1.6 equiv); *s*-BuLi 1.4 M (0.022 mL, 0.313 mmol, 1.6 equiv) in CPME (2 mL); and *N*-methoxy-*N*-methyl-2-furamide (0.030 g, 0.196 mmol, 1.0 equiv) dissolved in CPME (1 mL); compound **(S)-11** was obtained in 90% yield (0.063 g) as a white solid; mp 147-150 °C. Reaction run in larger scale starting from **1** (1.58 g, 6 mmol, 1.5 equiv); (+)-sparteine (1.5 g, 6.4 mmol, 1.6 equiv); *s*-BuLi 1.4 M (4.57 mL, 6.4 mmol, 1.6 equiv) and *N*-methoxy-*N*-methyl-2-furamide (0.620 g, 4 mmol, 1.0 equiv) in CPME (27 mL) allowed to recover CPME (86%, 23.2 mL) and prepare **(S)-11** in comparable yield (83%, 1.18 g). The organic layer from the basic extraction with CPME (30 mL) afforded upon distillation (+)-sparteine (80%, 1.2 g, 1.18 mL), *N*-methyl-*N*-methoxyamine (65%, 2.6 mmol, 0.20 mL) and CPME (94%, 28.3 mL).

$[\alpha]_D^{+35}$  (c 0.5, CHCl<sub>3</sub>).

**HPLC analysis:** Chiralpak IA Column,  $\lambda$  250 nm, eluent: *n*-hexane / *i*-propanol 80/20. Flow: 1 mL/min

**Racemate**

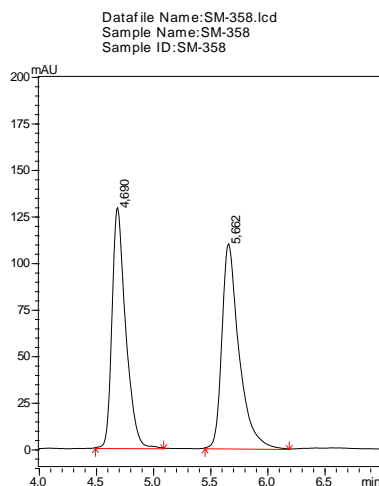

| Peaks | Retention time (min) | Area    | Area%   |
|-------|----------------------|---------|---------|
| 1     | 4,690                | 1067464 | 48,416  |
| 2     | 5,662                | 1137305 | 51,584  |
| Total |                      | 2204769 | 100,000 |

**Enantioenriched (S)-11**

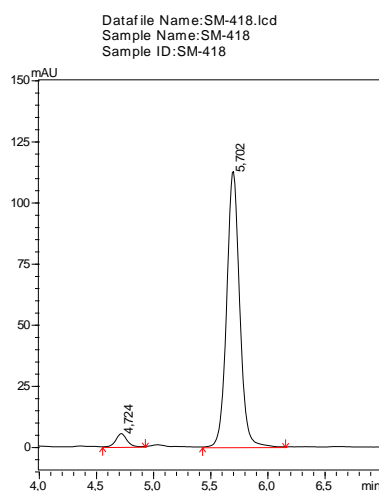

| Peaks | Retention time (min) | Area   | Area%   |
|-------|----------------------|--------|---------|
| 1     | 4,724                | 34349  | 3,713   |
| 2     | 5,702                | 890792 | 96,287  |
| Total |                      | 925141 | 100,000 |

**(R)-1-Oxo-4-phenyl-1-(2-thienyl)-2-butanyl diisopropylcarbamate, ((R)-12)**

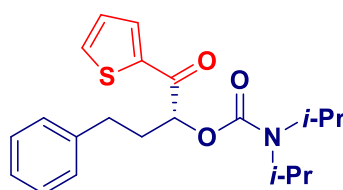

Synthesized according to **GP1** using **1** (0.144 g, 0.546 mmol, 1.5 equiv); (-)-sparteine (0.136 g, 0.582 mmol, 1.6 equiv); *s*-BuLi 1.3 M (0.45 mL, 0.582 mmol, 1.6 equiv) in CPME (2 mL); and *N*-methoxy-*N*-methyl-2-thiophenecarboxamide (0.062 g, 0.364 mmol, 1.0 equiv) dissolved in CPME (1 mL); compound **(R)-12** was obtained in 88% yield (0.119 g) as a white solid; mp 124-127 °C. Reaction run in larger scale starting from **1** (1.58 g, 6 mmol, 1.5 equiv); (-)-sparteine (1.5 g, 6.4 mmol, 1.6 equiv); *s*-BuLi 1.4 M (4.57 mL, 6.4 mmol, 1.6 equiv) and *N*-methoxy-*N*-methyl-2-thiophenecarboxamide (0.684 g, 4 mmol, 1.0 equiv) in CPME (27 mL) allowed to recover CPME (90%, 24.4 mL) and prepare **(R)-12** in comparable yield (80%, 1.19 g). The organic layer from the basic extraction with CPME (30 mL) afforded upon distillation (-)-sparteine (70%, 1.15 g, 1.13 mL), *N*-methyl-*N*-methoxyamine (65%, 2.6 mmol, 0.20 mL) and CPME (92%, 27.7 mL).

<sup>1</sup>H NMR (400 MHz, CDCl<sub>3</sub>): δ 7.64 (m, 2H, Th H-3,5), 7.30 (m, 2H, Ph H-3,5), 7.21 (m, 1H, Ph H-4), 7.19 (m, 2H, Ph H-2,6), 7.09 (m, 1H, Th H-4), 5.69 (m, 1H, CHC=O), 4.03 (br s, 1H, CHCH<sub>3</sub>), 3.88 (br s, 1H, CHCH<sub>3</sub>), 2.75-2.91 (m, 2H, PhCH<sub>2</sub>), 2.20-2.26 (m, 2H, CH<sub>2CH), 1.34-1.21 (br, 12H, CH<sub>3</sub>).</sub>

<sup>13</sup>C NMR (100 MHz, CDCl<sub>3</sub>): δ 190.2 (ThC=O), 154.7 (NC=O), 141.2 (Th C-2), 140.7 (Ph C-1), 133.9 (Th C-5), 132.2 (Th C-3), 128.6 (Ph C-3,5), 128.4 (Ph C-2,6), 128.1 (Th C-4), 126.2 (Ph C-4), 75.2 (CHC=O), 46.7 (CHCH<sub>3</sub>), 45.7 (CHCH<sub>3</sub>), 33.7 (CH<sub>2</sub>CH), 31.9 (PhCH<sub>2</sub>), 21.8 (CH<sub>3</sub> via HSQC), 21.4 (CH<sub>3</sub> via HSQC), 20.5 (CH<sub>3</sub> br).

HRMS (ESI), *m/z*: calcd. for C<sub>21</sub>H<sub>27</sub>NNaO<sub>3</sub>S 396.1604 [M+Na]<sup>+</sup>; found 396.1607.

[α]<sub>D</sub> -41 (c 0.5, CHCl<sub>3</sub>).

HPLC analysis: Chiralpak IA Column, λ 250 nm, eluent: *n*-hexane / *i*-propanol 80/20. Flow: 1 mL/min

HPLC analysis: Chiralpak IA Column, λ 250 nm, eluent: *n*-hexane / *i*-propanol 80/20. Flow: 1 mL/min

### Racemate

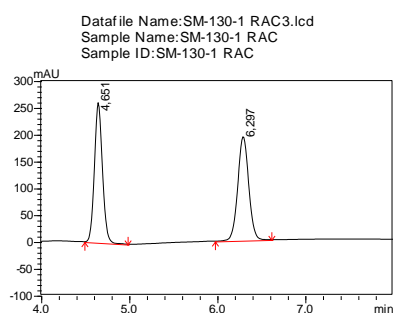

| Peaks | Retention time (min) | Area    | Area%   |
|-------|----------------------|---------|---------|
| 1     | 4,651                | 1640815 | 49,638  |
| 2     | 6,297                | 1664745 | 50,362  |
| Total |                      | 3305560 | 100,000 |

### Enantioenriched (R)-12

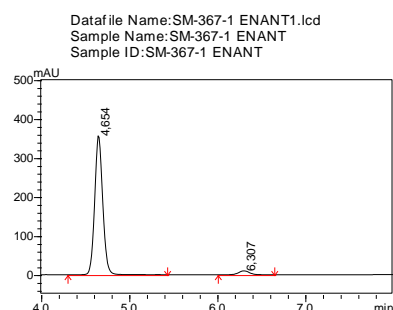

| Peaks | Retention time (min) | Area    | Area%  |
|-------|----------------------|---------|--------|
| 1     | 4,654                | 2266034 | 96,224 |

|       |       |         |         |
|-------|-------|---------|---------|
| 2     | 6,307 | 88926   | 3,776   |
| Total |       | 2354960 | 100,000 |

**(R)-4-Oxo-1,6-diphenyl-5-hexyn-3-yl diisopropylcarbamate, ((R)-13)**

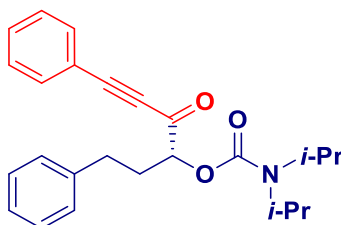

Synthesized according to **GP1** using **1** (0.077 g, 0.294 mmol, 1.5 equiv); (-)-sparteine (0.073 g, 0.313 mmol, 1.6 equiv); *s*-BuLi 1.4 M (0.022 mL, 0.313 mmol, 1.6 equiv) in CPME (2 mL); and *N*-methoxy-*N*-methyl-3-phenyl-2-propynamide (0.037 g, 0.196 mmol, 1.0 equiv) dissolved in CPME (1 mL); compound **(R)-13** was obtained in 77% yield (0.059 g) as a white solid; mp 73-74 °C. Reaction run with (-)-sparteine recovered from preparation of **(R)-12**.

<sup>1</sup>H NMR (400 MHz, CDCl<sub>3</sub>): δ 7.54 (m, 2H, Ph<sup>1</sup> H-2,6), 7.46 (m, 1H, Ph<sup>1</sup> H-4), 7.37 (m, 2H, Ph<sup>1</sup> H-3,5), 7.30 (m, 2H, Ph H-3,5), 7.22 (m, 2H, Ph H-2,6), 7.21 (m, 1H, Ph H-4), 5.17 (m, 1H, CHC=O), 4.08 (br s, 1H, CHCH<sub>3</sub>), 3.89 (br s, 1H, CHCH<sub>3</sub>), 2.89-2.76 (m, 2H, PhCH<sub>2</sub>), 2.35-2.18 (m, 2H, CH<sub>2</sub>CH), 1.40-1.20 (br, 12H, CH<sub>3</sub>).

<sup>13</sup>C NMR (100 MHz, CDCl<sub>3</sub>): δ 185.6 (C=O), 154.6 (NC=O), 140.7 (Ph C-1), 132.9 (Ph<sup>1</sup> C-2,6), 130.8 (Ph<sup>1</sup> C-4), 128.6 (Ph<sup>1</sup> C-3,5), 128.5 (Ph C-3,5), 128.4 (Ph C-2,6), 126.2 (Ph C-4), 119.8 (Ph<sup>1</sup> C-1), 93.6 (C=OC≡C), 85.8 (C=OC≡C), 78.8 (CHC=O), 46.7 (br CHCH<sub>3</sub>), 45.7 (br CHCH<sub>3</sub>), 32.6 (CH<sub>2</sub>CH), 31.6 (PhCH<sub>2</sub>), 21.7 (br CH<sub>3</sub>), 21.5 (CH<sub>3</sub> br), 20.4 (br, 2×CH<sub>3</sub>).

**HRMS** (ESI), *m/z*: calcd. for C<sub>25</sub>H<sub>30</sub>NO<sub>3</sub> 392.2219 [M+H]<sup>+</sup>; found 392.2220.

[α]<sub>D</sub> -44 (c 0.5, CHCl<sub>3</sub>).

**HPLC analysis:** Chiralpak IA Column, λ 254 nm, eluent: *n*-hexane / *i*-propanol 80/20. Flow: 1 mL/min

**Racemate**

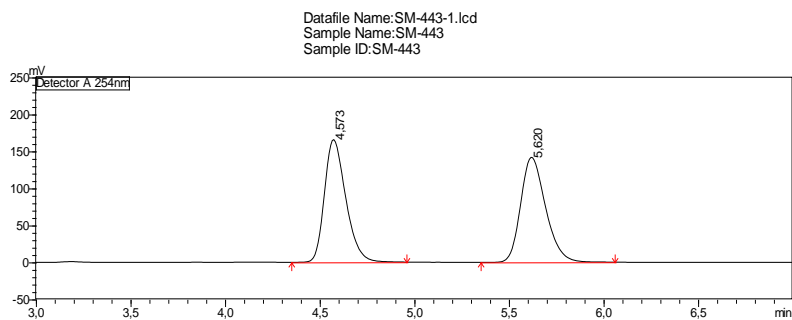

| Peaks | Retention time (min) | Area    | Area%   |
|-------|----------------------|---------|---------|
| 1     | 4,573                | 1299951 | 50,035  |
| 2     | 5,620                | 1298135 | 49,965  |
| Total |                      | 2598086 | 100,000 |

### Enantioenriched (*R*)-13

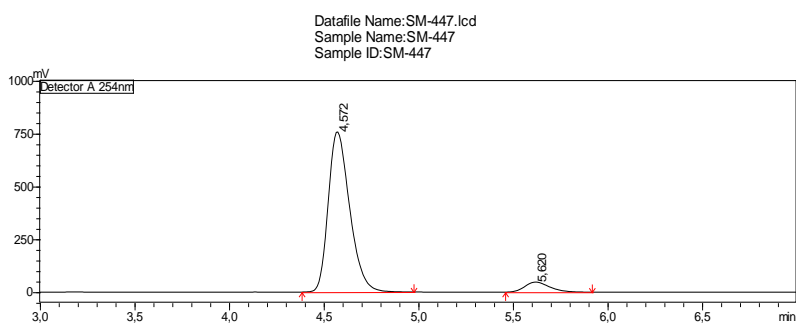

| Peaks | Retention time (min) | Area    | Area%   |
|-------|----------------------|---------|---------|
| 1     | 4,572                | 5975193 | 93,295  |
| 2     | 5,620                | 429434  | 6,705   |
| Total |                      | 6404627 | 100,000 |

### (*R*)-(5*E*)-4-Oxo-1,6-diphenyl-5-hexen-3-yl diisopropylcarbamate, ((*R*)-14)

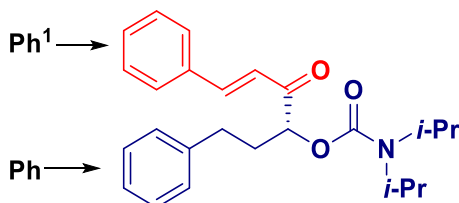

Synthesized according to **GP1** using **1** (0.077 g, 0.294 mmol, 1.5 equiv); (-)-sparteine (0.073 g, 0.313 mmol, 1.6 equiv); *s*-BuLi 1.4 M (0.022 mL, 0.313 mmol, 1.6 equiv) in CPME (2 mL); and (*2E*)-*N*-methoxy-

*N*-methyl-3-phenylacrylamide (0.038 g, 0.196 mmol, 1.0 equiv) dissolved in CPME (1 mL); compound **(R)**-14 was obtained in 78% yield (0.060 g) as a white solid; mp 77-80 °C.

<sup>1</sup>H NMR (400 MHz, CDCl<sub>3</sub>): δ 7.65 (d, *J* = 16.0 Hz, 1H, CH=CHPh), 7.52 (m, 2H, Ph<sup>1</sup> H-2,6), 7.39 (m, 3H, Ph<sup>1</sup> H-3,4,5), 7.30 (m, 2H, Ph H-3,5), 7.21 (m, 3H, Ph H-2,4,6), 6.86 (d, *J* = 16.0 Hz, 1H, CH=CHPh), 5.30 (dd, *J* = 7.8 Hz, 5.2 Hz, 1H, CHC=O), 4.08 (br s, 1H, CHCH<sub>3</sub>), 3.89 (br s, 1H, CHCH<sub>3</sub>), 2.74-2.88 (m, 2H, PhCH<sub>2</sub>), 2.10-2.24 (m, 2H, CH<sub>2</sub>CH), 1.15-1.45 (br, 12H, CH<sub>3</sub>).

<sup>13</sup>C NMR (100 MHz, CDCl<sub>3</sub>): δ 197.0 (CH=CHC=O), 154.8 (NC=O), 143.9 (CH=CHPh), 140.9 (Ph C-1), 134.5 (Ph<sup>1</sup> C-1), 130.6 (Ph<sup>1</sup> C-4), 128.9 (Ph<sup>1</sup> C-3,5), 128.5 (Ph C-3,5), 128.4 (Ph C-2,6; Ph<sup>1</sup> C-2,6), 126.2 (Ph C-4), 121.4 (CH=CHPh), 77.4 (OCHC=O), 46.7 (CHCH<sub>3</sub>), 45.6 (CHCH<sub>3</sub>), 32.8 (CH<sub>2</sub>CH), 31.8 (PhCH<sub>2</sub>), 20.1-22.1 (CH<sub>3</sub>).

HRMS (ESI), *m/z*: calcd. for C<sub>25</sub>H<sub>32</sub>NO<sub>3</sub> 394.2377 [M+H]<sup>+</sup>; found 394.2380.

[α]<sub>D</sub> -20 (c 0.5, CHCl<sub>3</sub>).

HPLC analysis: Chiralpak IA Column, λ 250 nm, eluent: *n*-hexane / *i*-propanol 80/20. Flow: 1 mL/min

### Racemate

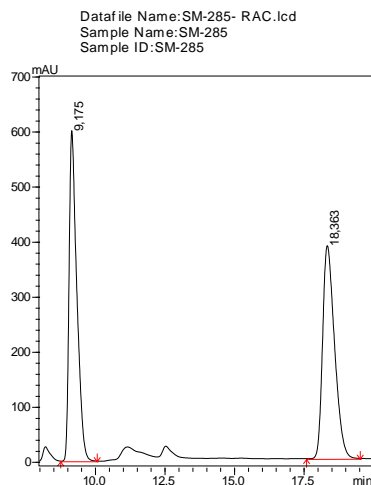

| Peaks | Retention time (min) | Area     | Area%   |
|-------|----------------------|----------|---------|
| 1     | 9,175                | 11611457 | 50,143  |
| 2     | 18,363               | 11545028 | 49,857  |
| Total |                      | 23156486 | 100,000 |



## Enantioenriched (R)-14

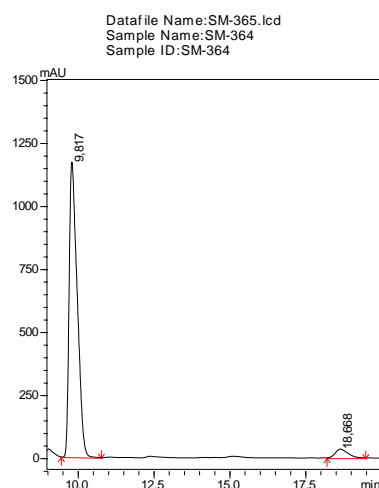

| Peaks | Retention time (min) | Area     | Area%   |
|-------|----------------------|----------|---------|
| 1     | 9,817                | 21600332 | 95,648  |
| 2     | 18,668               | 982877   | 4,352   |
| Total |                      | 22583208 | 100,000 |

## (S)-(5E)-4-Oxo-1,6-diphenyl-5-hexen-3-yl diisopropylcarbamate, ((S)-14)

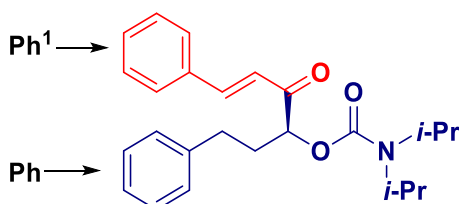

Synthesized according to **GP1** using **1** (0.077 g, 0.294 mmol, 1.5 equiv); (+)-sparteine (0.073 g, 0.313 mmol, 1.6 equiv); *s*-BuLi 1.4 M (0.022 mL, 0.313 mmol, 1.6 equiv) in CPME (2 mL); and (2*E*)-*N*-methoxy-*N*-methyl-3-phenylacrylamide (0.038 g, 0.196 mmol, 1.0 equiv) dissolved in CPME (1 mL); compound **(S)-14** was obtained in 75% yield (0.058 g) as a white solid; mp 77-80 °C. Reaction run with (+)-sparteine recovered from preparation of **(S)-11**.

$[\alpha]_D^{+43}$  (c 0.5, CHCl<sub>3</sub>).

**HPLC analysis:** Chiralpak IA Column, λ 250 nm, eluent: *n*-hexane / *i*-propanol 80/20. Flow: 1 mL/min

## Racemate

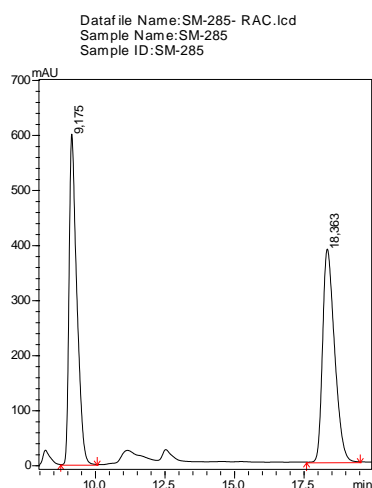

| Peaks | Retention time (min) | Area     | Area%   |
|-------|----------------------|----------|---------|
| 1     | 9,175                | 11611457 | 50,143  |
| 2     | 18,363               | 11545028 | 49,857  |
| Total |                      | 23156486 | 100,000 |

## Enantioenriched (S)-14

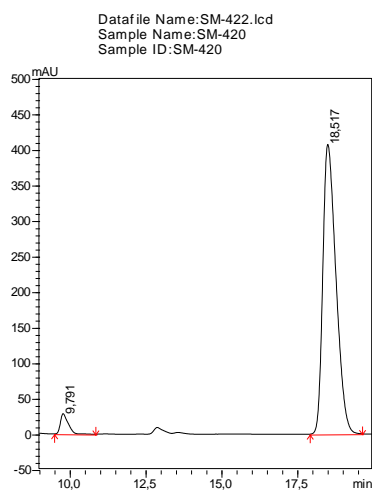

| Peaks | Retention time (min) | Area     | Area%   |
|-------|----------------------|----------|---------|
| 1     | 9,791                | 499382   | 3,911   |
| 2     | 18,517               | 12270734 | 96,089  |
| Total |                      | 12770116 | 100,000 |

**(R)-1-(Adamantan-1-yl)-1-oxo-4-phenyl-2-butanyl diisopropylcarbamate, ((R)-15)**

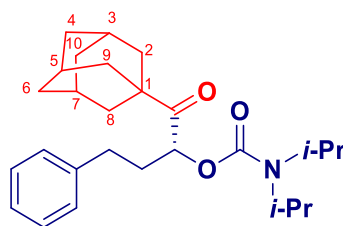

Synthesized according to **GP1** using **1** (0.077 g, 0.294 mmol, 1.5 equiv); (-)-sparteine (0.073 g, 0.313 mmol, 1.6 equiv); *s*-BuLi 1.4 M (0.022 mL, 0.313 mmol, 1.6 equiv) in CPME (2 mL); and *N*-methoxy-*N*-methyl-1-adamantanecarboxamide (0.044 g, 0.196 mmol, 1.0 equiv) dissolved in CPME (1 mL); compound **(R)-15** was obtained in 83% yield (0.069 g) as a white solid; mp 60–63 °C. Reaction run in larger scale starting from **1** (1.58 g, 6 mmol, 1.5 equiv); (-)-sparteine (1.5 g, 6.4 mmol, 1.6 equiv); *s*-BuLi 1.4 M (4.57 mL, 6.4 mmol, 1.6 equiv) and *N*-methoxy-*N*-methyl-1-adamantanecarboxamide (0.893 g, 4 mmol, 1.0 equiv) in CPME (27 mL) allowed to recover CPME (91%, 24.7 mL) and prepare **(R)-15** in comparable yield (78%, 1.32 g). The organic layer from the basic extraction with CPME (30 mL) afforded upon distillation (-)-sparteine (83%, 1.24 g, 1.22 mL), *N*-methyl-*N*-methoxyamine (70%, 2.8 mmol, 0.21 mL) and CPME (93%, 28.0 mL).

<sup>1</sup>H NMR (400 MHz, CDCl<sub>3</sub>): δ 7.30 (m, 2H, Ph H-3,5), 7.20 (m, 1H, Ph H-4), 7.19 (m, 2H, Ph H-2,6), 5.42 (dd, *J* = 8.1 Hz, 3.7 Hz, 1H, CHC=O), 4.10 (br s, 1H, CHCH<sub>3</sub>), 3.75 (br s, 1H, CHCH<sub>3</sub>), 2.66–2.84 (m, 2H, PhCH<sub>2</sub>), 1.93–2.06 (m, 2H, CH<sub>2</sub>CH), 2.01 (m, 3H, Adam H-3,5,7), 1.92 (m, 3H, Adam H-2,8,9), 1.82 (m, 3H, Adam H-2,8,9), 1.69 (m, 6H, Adam H-4,6,10), 1.38 (br s, 6H, CH<sub>3</sub>), 1.15 (br s, 6H, CH<sub>3</sub>).

<sup>13</sup>C NMR (100 MHz, CDCl<sub>3</sub>): δ 211.9 (Adam C=O), 154.8 (NC=O), 141.1 (Ph C-1), 128.5 (Ph C-3,5), 128.4 (Ph C-2,6), 126.2 (Ph C-4), 73.0 (CHC=O), 46.7 (CHCH<sub>3</sub>), 45.7 (Adam C-1), 45.3 (CHCH<sub>3</sub>), 38.4 (Adam C-2,8,9), 36.4 (Adam C-4,6,10), 33.0 (CH<sub>2</sub>CH), 32.1 (PhCH<sub>2</sub>), 27.9 (Adam C-3,5,7), 21.9 (CH<sub>3</sub> br), 21.4 (CH<sub>3</sub> br), 20.5 (br, 2×CH<sub>3</sub>).

HRMS (ESI), *m/z*: calcd. for C<sub>27</sub>H<sub>40</sub>NO<sub>3</sub> 426.3003[M+H]<sup>+</sup>; found 426.3004.

[α]<sub>D</sub><sup>-30</sup> (c 0.5, CHCl<sub>3</sub>).

HPLC analysis: Chiralpak IG Column, λ 250 nm, eluent: *n*-hexane / *i*-propanol 95/5. Flow: 1 mL/min

## Racemate

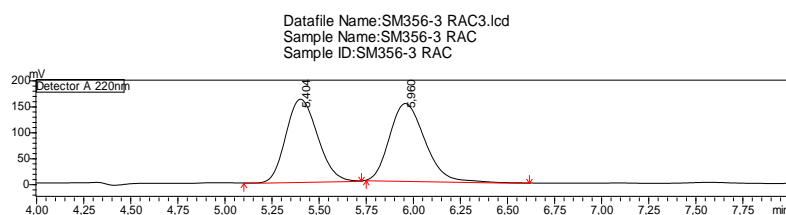

| Peaks | Retention time (min) | Area    | Area%   |
|-------|----------------------|---------|---------|
| 1     | 5,404                | 1858480 | 49,114  |
| 2     | 5,960                | 1925501 | 50,886  |
| Total |                      | 3783980 | 100,000 |

## Enantioenriched (R)-15

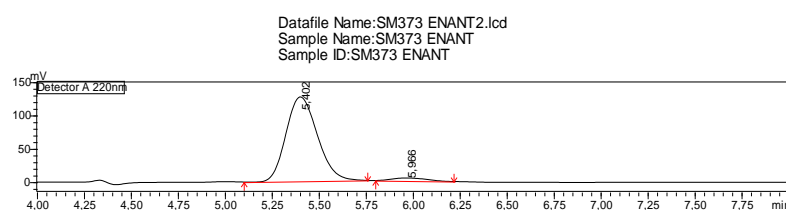

| Peaks | Retention time (min) | Area    | Area%   |
|-------|----------------------|---------|---------|
| 1     | 5,402                | 1468079 | 96,404  |
| 2     | 5,966                | 54762   | 3,596   |
| Total |                      | 1522841 | 100,000 |

## (R)-1-Cyclopropyl-1-oxo-4-phenyl-2-butanyl diisopropylcarbamate, ((R)-16)

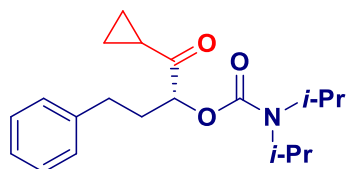

Synthesized according to **GP1** using **1** (0.077 g, 0.294 mmol, 1.5 equiv); (-)-sparteine (0.073 g, 0.313 mmol, 1.6 equiv); *s*-BuLi 1.4 M (0.022 mL, 0.313 mmol, 1.6 equiv) in CPME (2 mL); and *N*-methoxy-*N*-methylcyclopropanecarboxamide (0.025g, 0.196 mmol, 1.0 equiv) dissolved in CPME (1 mL); compound **(R)-16** was obtained by chromatography purification on silica gel (pentane/CPME 95:5) in 80% yield (0.052 g) as an oil. Reaction run with (-)-sparteine recovered from preparation of **(R)-15**.

**<sup>1</sup>H NMR** (400 MHz, CDCl<sub>3</sub>): δ 7.30 (m, 2H, Ph H-3,5), 7.21 (m, 1H, Ph H-4), 7.20 (m, 2H, Ph H-2,6), 5.77 (m, 1H, CHC=O), 4.07 (br s, 1H, CHCH<sub>3</sub>), 3.86 (br s, 1H, CHCH<sub>3</sub>), 2.82-2.71 (m, 2H, PhCH<sub>2</sub>), 2.24-2.06 (m, 2H, CH<sub>2</sub>CH), 1.96-2.03 (m, 1H, Cycprop H-1), 1.40-1.18 (br, 3H, CH<sub>3</sub>), 1.15-1.10 (m, 1H, Cycprop H-2), 1.06-0.99 (m, 1H, Cycprop H-3), 0.95-0.88 (m, 2H, Cycprop H-2,3).

**<sup>13</sup>C NMR** (100 MHz, CDCl<sub>3</sub>): δ 208.0 (C=O), 154.8 (NC=O), 141.0 (Ph C-1), 128.5 (Ph C-3,5), 128.3 (Ph C-2,6), 126.1 (Ph C-4), 78.7 (CHC=O), 46.7 (CHCH<sub>3</sub>), 45.6 (CHCH<sub>3</sub>), 32.7 (CH<sub>2</sub>CH), 31.9 (PhCH<sub>2</sub>), 21.8 (br, CH<sub>3</sub>), 21.5 (br, CH<sub>3</sub>), 20.5 (br, 2×CH<sub>3</sub>), 17.0 (Cycprop C-1), 11.4 (Cycprop C-3), 11.0 (Cycprop C-2).

**HRMS** (ESI), *m/z*: calcd. for C<sub>20</sub>H<sub>30</sub>NO<sub>3</sub> 332.2220 [M+H]<sup>+</sup>; found 332.2222.

**[α]<sub>D</sub>** -28 (c 0.5, CHCl<sub>3</sub>).

**HPLC analysis:** Chiralpak IA Column, λ 250 nm, eluent: *n*-hexane / *i*-propanol 80/20. Flow: 1 mL/min

### Racemate

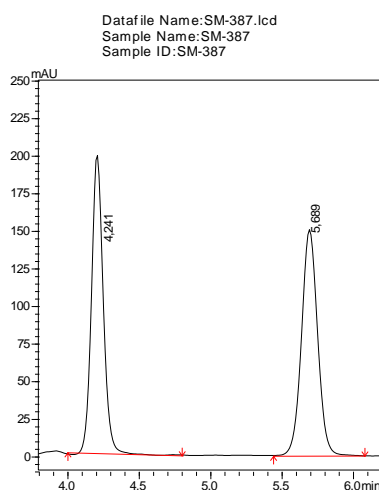

| Peaks | Retention time (min) | Area    | Area%   |
|-------|----------------------|---------|---------|
| 1     | 4,241                | 1121284 | 48,987  |
| 2     | 5,689                | 1167639 | 51,013  |
| Total |                      | 2288923 | 100,000 |

## Enantioenriched (R)-16

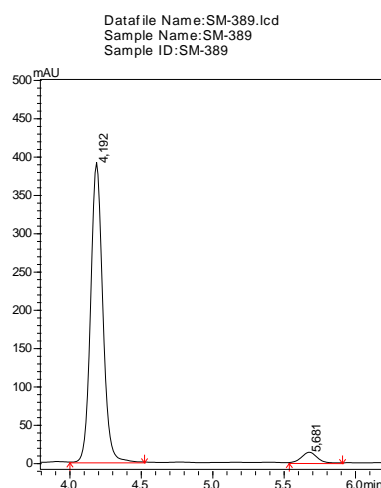

| Peaks | Retention time (min) | Area    | Area%   |
|-------|----------------------|---------|---------|
| 1     | 4,192                | 2321047 | 95,964  |
| 2     | 5,681                | 97623   | 4,036   |
| Total |                      | 2418670 | 100,000 |

## (S)-1-Cyclopropyl-1-oxo-4-phenyl-2-butanyl diisopropylcarbamate, ((S)-16)

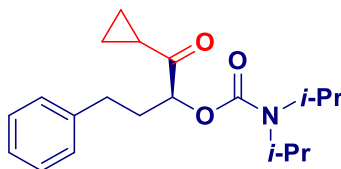

Synthesized according to **GP1** using **1** (0.077 g, 0.294 mmol, 1.5 equiv); (+)-sparteine (0.073 g, 0.313 mmol, 1.6 equiv); *s*-BuLi 1.4 M (0.022 mL, 0.313 mmol, 1.6 equiv) in CPME (2 mL); and *N*-methoxy-*N*-methylcyclopropanecarboxamide (0.025 g, 0.196 mmol, 1.0 equiv) dissolved in CPME (1 mL); compound **(S)-16** was obtained by chromatography purification on silica gel (pentane/CPME 95:5) in 88% yield (0.057 g) as an oil.

$[\alpha]_D^{+14}$  (*c* 0.5, CHCl<sub>3</sub>).

**HPLC analysis:** Chiralpak IA Column,  $\lambda$  250 nm, eluent: *n*-hexane / *i*-propanol 80/20. Flow: 1 mL/min

### Racemate

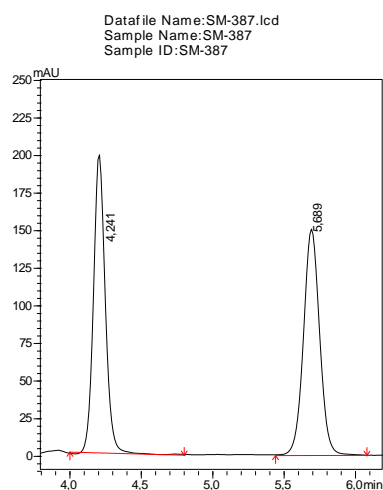

| Peaks | Retention time (min) | Area    | Area%   |
|-------|----------------------|---------|---------|
| 1     | 4,241                | 1121284 | 48,987  |
| 2     | 5,689                | 1167639 | 51,013  |
| Total |                      | 2288923 | 100,000 |

### Enantioenriched (S)-16

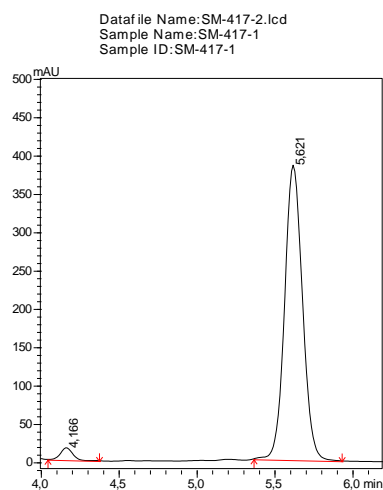

| Peaks | Retention time (min) | Area    | Area%   |
|-------|----------------------|---------|---------|
| 1     | 4,166                | 80762   | 97,420  |
| 2     | 5,621                | 3049329 | 2,580   |
| Total |                      | 3130090 | 100,000 |

**(R)-2-Oxo-1-phenoxy-5-phenyl-3-pentanyl diisopropylcarbamate, ((R)-17)**

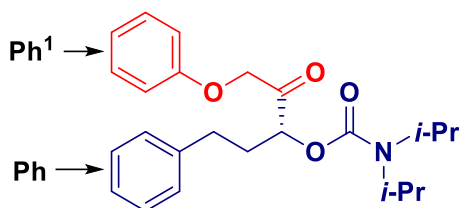

Synthesized according to **GP1** using **1** (0.077 g, 0.294 mmol, 1.5 equiv); (-)-sparteine (0.073 g, 0.313 mmol, 1.6 equiv); *s*-BuLi 1.4 M (0.022 mL, 0.313 mmol, 1.6 equiv) in CPME (2 mL); and *N*-methoxy-*N*-methyl-2-phenoxyacetamide (0.038 g, 0.196 mmol, 1.0 equiv) dissolved in CPME (1 mL); compound **(R)-17** was obtained in 79% yield (0.061 g) as a white solid; mp 62-65 °C.

<sup>1</sup>H NMR (400 MHz, CDCl<sub>3</sub>): δ 7.30 (m, 2H, Ph H-3,5), 7.28 (m, 2H, Ph<sup>1</sup> H-3,5), 7.22 (m, 1H, Ph H-4), 7.18 (m, 2H, Ph H-2,6), 6.98 (m, 1H, Ph<sup>1</sup> H-4), 6.87 (m, 2H, Ph<sup>1</sup> H-2,6), 5.29 (dd, *J* = 8.5 Hz, 4.1 Hz, 1H, CHC=O), 4.76 (s, 2H, CH<sub>2</sub>O), 4.03 (br s, 1H, CHCH<sub>3</sub>), 3.88 (br s, 1H, CHCH<sub>3</sub>), 2.73-2.88 (m, 2H, PhCH<sub>2</sub>), 2.08-2.26 (m, 2H, CH<sub>2</sub>CH), 1.40-1.20 (br s, 12H, CH<sub>3</sub>).

<sup>13</sup>C NMR (100 MHz, CDCl<sub>3</sub>): δ 203.9 (CH<sub>2</sub>C=O), 157.7 (Ph<sup>1</sup> C-1), 154.7 (NC=O), 140.5 (Ph C-1), 129.5 (Ph<sup>1</sup> C-3,5), 128.6 (Ph C-3,5), 128.4 (Ph C-2,6), 126.3 (Ph C-4), 121.6 (Ph<sup>1</sup> C-4), 114.5 (Ph<sup>1</sup> C-2,6), 76.0 (CHC=O), 70.9 (CH<sub>2</sub>O), 46.8 (CHCH<sub>3</sub>), 45.8 (CHCH<sub>3</sub>), 32.3 (CH<sub>2</sub>CH), 31.8 (PhCH<sub>2</sub>), 21.7 (CH<sub>3</sub> br), 21.4 (CH<sub>3</sub> br), 20.5 (2×CH<sub>3</sub>, br).

HRMS (ESI), *m/z*: calcd. for C<sub>24</sub>H<sub>32</sub>NO<sub>4</sub> 398.2326 [M+H]<sup>+</sup>; found 398.2328.

[α]<sub>D</sub> -11 (c 0.5, CHCl<sub>3</sub>).

HPLC analysis: Chiralpak IA Column, λ 250 nm, eluent: *n*-hexane / *i*-propanol 80/20. Flow: 0.5 mL/min

**Racemate**

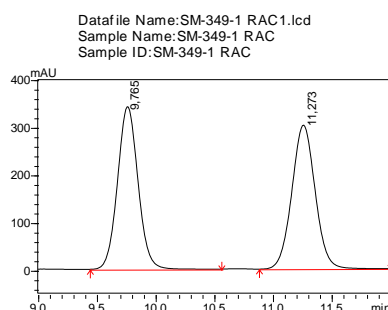

| Peaks | Retention time (min) | Area    | Area%  |
|-------|----------------------|---------|--------|
| 1     | 9,765                | 4146476 | 49,914 |



|       |        |         |         |
|-------|--------|---------|---------|
| 2     | 11,273 | 4160751 | 50,086  |
| Total |        | 8307227 | 100,000 |

**Enantioenriched (R)-17**

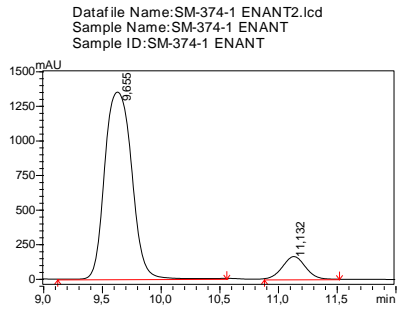

| Peaks | Retention time (min) | Area     | Area%   |
|-------|----------------------|----------|---------|
| 1     | 9,655                | 21423564 | 90,818  |
| 2     | 11,132               | 2166087  | 9,182   |
| Total |                      | 23589651 | 100,000 |

**(R)-1-Oxo-2-phenyl-2-propanyl diisopropylcarbamate, ((R)-19)**

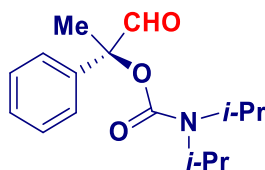

Synthesized according to **GP2** using **(R)-18** (0.073 g, 0.294 mmol, 1.5 equiv); *s*-BuLi 1.4 M (0.022 mL, 0.313 mmol, 1.6 equiv) in CPME (2 mL); and *N*-methoxy-*N*-methylformamide (0.017 g, 0.196 mmol, 1.0 equiv) dissolved in CPME (1 mL); compound **(R)-19** was obtained in 75% yield (0.041 g) as a white solid; mp 100-103 °C

<sup>1</sup>H NMR (400 MHz, CDCl<sub>3</sub>): δ 9.47 (s, 1H, CHO), 7.46 (m, 2H, Ph H-2,6), 7.40 (m, 2H, Ph H-3,5), 7.33 (m, 1H, Ph H-4), 4.01 (sept, *J* = 6.9 Hz, 2H, CHCH<sub>3</sub>), 1.84 (s, 3H, CH<sub>3</sub>), 1.33 (br s, 6H, CHCH<sub>3</sub>), 1.27 (br, 6H, CHCH<sub>3</sub>).

<sup>13</sup>C NMR (100 MHz, CDCl<sub>3</sub>): δ 194.3 (CHO), 154.1 (NC=O), 137.1 (Ph C-1), 128.7 (Ph C-3,5), 128.2 (Ph C-4), 125.8 (Ph C-2,6), 85.3 (PhC), 46.8 (CHCH<sub>3</sub>), 46.2 (CHCH<sub>3</sub>), 21.6 (CHCH<sub>3</sub>), 21.4 (CHCH<sub>3</sub>), 21.2 (CH<sub>3</sub>), 20.5 (CHCH<sub>3</sub>), 20.3 (CHCH<sub>3</sub>).

HRMS (ESI), *m/z*: calcd. for C<sub>16</sub>H<sub>23</sub>NNaO<sub>3</sub> 300.1570[M+Na]<sup>+</sup>; found 300.1575.

[α]<sub>D</sub> +75 (*c* 0.5, CHCl<sub>3</sub>).

HPLC analysis: Chiralpak IA Column, λ 250 nm, eluent: *n*-hexane / *i*-propanol 99/1. Flow: 1 mL/min

**Racemate**

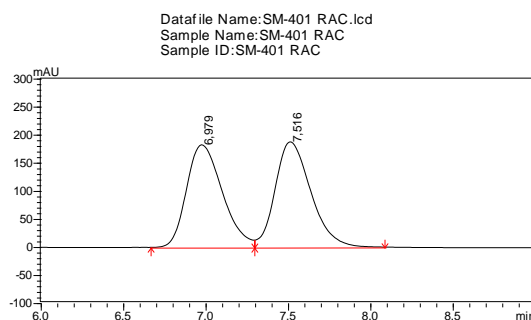

| Peaks | Retention time (min) | Area    | Area%   |
|-------|----------------------|---------|---------|
| 1     | 6,979                | 2757914 | 49,461  |
| 2     | 7,516                | 2818041 | 50,539  |
| Total |                      | 5575955 | 100,000 |

## Enantioenriched (*R*)-19

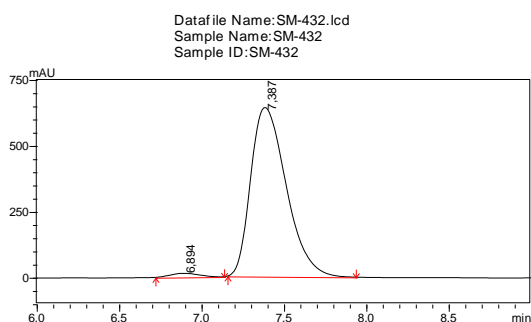

| Peaks | Retention time (min) | Area    | Area%   |
|-------|----------------------|---------|---------|
| 1     | 6,894                | 165705  | 1,696   |
| 2     | 7,387                | 9606305 | 98,304  |
| Total |                      | 9772010 | 100,000 |

## (*S*)-1-Oxo-2-phenyl-2-propanyl diisopropylcarbamate, (*S*)-19

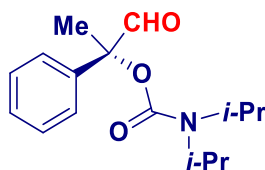

Synthesized according to **GP2** using (**S**)-18 (0.073 g, 0.294 mmol, 1.5 equiv); s-BuLi 1.4 M (0.022 mL, 0.313 mmol, 1.6 equiv) in CPME (2 mL); and *N*-methoxy-*N*-methylformamide (0.017 g, 0.196 mmol, 1.0 equiv) dissolved in CPME (1 mL); compound (**S**)-19 was obtained in 95% yield (0.052g) as a white solid; mp 100-103 °C (lit.<sup>3</sup> 105 °C)

$[\alpha]_D^{25}$  -103 (c 0.5, CHCl<sub>3</sub>). Lit.<sup>3</sup> -116.1 (c 0.7, CH<sub>2</sub>Cl<sub>2</sub>). Retention of configuration.

## Racemate

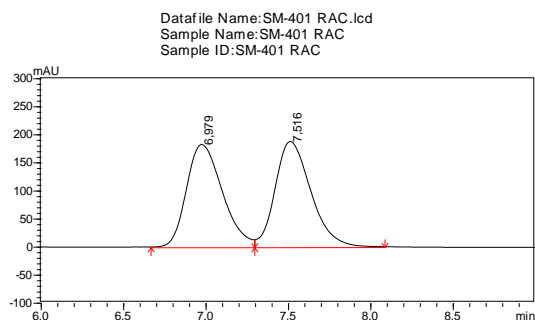

| Peaks | Retention time (min) | Area    | Area%   |
|-------|----------------------|---------|---------|
| 1     | 6,979                | 2757914 | 49,461  |
| 2     | 7,516                | 2818041 | 50,539  |
| Total |                      | 5575955 | 100,000 |

### Enantioenriched (S)-19

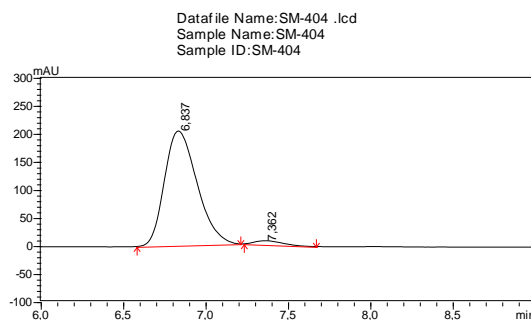

| Peaks | Retention time (min) | Area    | Area%   |
|-------|----------------------|---------|---------|
| 1     | 6,837                | 2807938 | 97,289  |
| 2     | 7,362                | 78253   | 2,711   |
| Total |                      | 2886191 | 100,000 |

### (R)-1-Oxo-1,2-diphenyl-2-propanyl diisopropylcarbamate, ((R)-20)

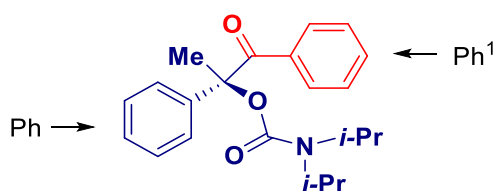

Synthesized according to **GP2** using **(R)-18** (0.073 g, 0.294 mmol, 1.5 equiv); *s*-BuLi 1.4 M (0.022 mL, 0.313 mmol, 1.6 equiv) in CPME (2 mL); and *N*-methoxy-*N*-methylbenzamide (0.032 g, 0.196 mmol, 1.0 equiv) dissolved in CPME (1 mL); compound **(R)-20** was obtained in 98% yield (0.068 g) as a white solid; mp 95-99 °C. (lit. <sup>3</sup> 105 °C)

<sup>1</sup>H NMR (400 MHz, CDCl<sub>3</sub>): δ 7.69 (m, 2H, Ph<sup>1</sup> H-2,6), 7.54 (m, 2H, Ph H-2,6), 7.39 (m, 2H, Ph H-3,5), 7.33 (m, 1H, Ph<sup>1</sup> H-4), 7.31 (m, 1H, Ph H-4), 7.21 (m, 2H, Ph<sup>1</sup> H-3,5), 4.22 (m, 1H, CHCH<sub>3</sub>), 3.52 (m, 1H, CHCH<sub>3</sub>), 1.98 (s, 3H, CH<sub>3</sub>), 1.29 (d, *J* = 6.7 Hz, 3H, CHCH<sub>3</sub>), 1.23 (d, *J* = 6.7 Hz, 3H, CHCH<sub>3</sub>), 1.10 (d, *J* = 6.7 Hz, 3H, CHCH<sub>3</sub>), 0.79 (d, *J* = 6.7 Hz, 3H, CHCH<sub>3</sub>).

<sup>13</sup>C NMR (100 MHz, CDCl<sub>3</sub>): δ 197.3 (PhC=O), 152.6 (NC=O), 141.2 (Ph C-1), 136.1 (Ph<sup>1</sup> C-1), 131.3 (Ph<sup>1</sup> C-4), 129.0 (Ph<sup>1</sup> C-2,6), 128.9 (Ph C-3,5), 127.7 (Ph C-4), 127.6 (Ph<sup>1</sup> C-3,5), 124.4 (Ph C-2,6), 86.6 (PhC), 46.6 (CHCH<sub>3</sub>), 45.8 (CHCH<sub>3</sub>), 27.8 (CH<sub>3</sub>), 21.3 (CHCH<sub>3</sub>), 21.0 (CHCH<sub>3</sub>), 20.5 (CHCH<sub>3</sub>), 19.6 (CHCH<sub>3</sub>).

<sup>15</sup>N NMR (40 MHz, CDCl<sub>3</sub>): δ -267.7.

HRMS (ESI), *m/z*: calcd. for C<sub>22</sub>H<sub>27</sub>NNaO<sub>3</sub> 376.1883 [M+Na]<sup>+</sup>; found 376.1892.

[α]<sub>D</sub>+86 (c 0.5, CHCl<sub>3</sub>). *Lit.*<sup>3</sup> +113 (c 1.1, CH<sub>2</sub>Cl<sub>2</sub>).

HPLC analysis: Chiralpak IA Column, λ 250 nm, eluent: *n*-hexane / *i*-propanol 95/5. Flow: 1 mL/min

### Racemate

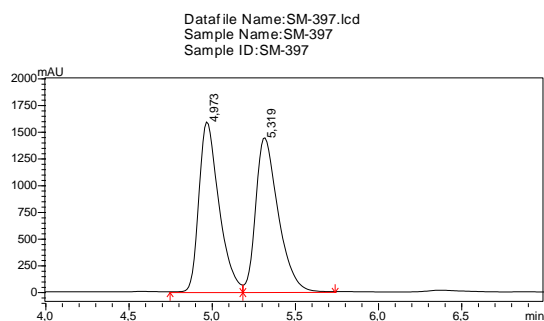

| Peaks | Retention time (min) | Area     | Area%   |
|-------|----------------------|----------|---------|
| 1     | 4,973                | 13268363 | 49,603  |
| 2     | 5,319                | 13480496 | 50,397  |
| Total |                      | 26748860 | 100,000 |

### Enantioenriched (R)-20

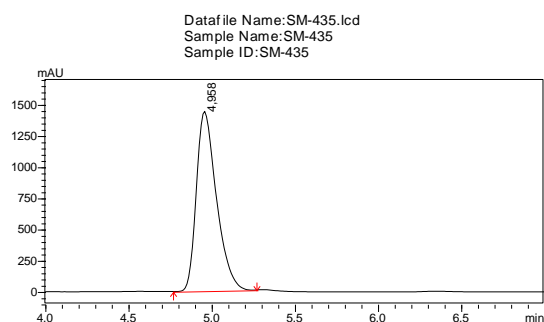

| Peaks | Retention time (min) | Area     | Area%   |
|-------|----------------------|----------|---------|
| 1     | 4,958                | 12065873 | 100,000 |
| Total |                      | 12065873 | 100,000 |

### (S)-1-Oxo-1,2-diphenyl-2-propanyl diisopropylcarbamate, ((S)-20)

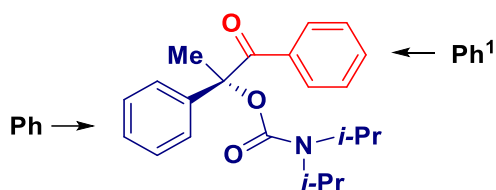

Synthesized according to **GP2** using **(S)-18** (0.073 g, 0.294 mmol, 1.5 equiv); *s*-BuLi 1.4 M (0.022 mL, 0.313 mmol, 1.6 equiv) in CPME (2 mL); and *N*-methoxy-*N*-methylbenzamide (0.032 g, 0.196 mmol, 1.0 equiv) dissolved in CPME (1 mL); compound **(S)-20** was obtained in 98% yield (0.068 g) as a white solid; mp 95-99 °C (lit. <sup>3</sup> 105 °C)

$[\alpha]_D^{25}$  -99 (c 0.5, CHCl<sub>3</sub>). Lit. <sup>3</sup> -104.7 (c 1.1, CH<sub>2</sub>Cl<sub>2</sub>). Retention of configuration.

**HPLC analysis:** Chiralpak IA Column, λ 250 nm, eluent: *n*-hexane / *i*-propanol 95/5. Flow: 1 mL/min

#### Racemate

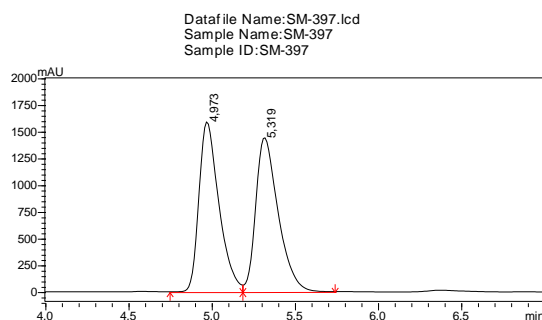

| Peaks | Retention time (min) | Area     | Area%   |
|-------|----------------------|----------|---------|
| 1     | 4,973                | 13268363 | 49,603  |
| 2     | 5,319                | 13480496 | 50,397  |
| Total |                      | 26748860 | 100,000 |

#### Enantioenriched (S)-20

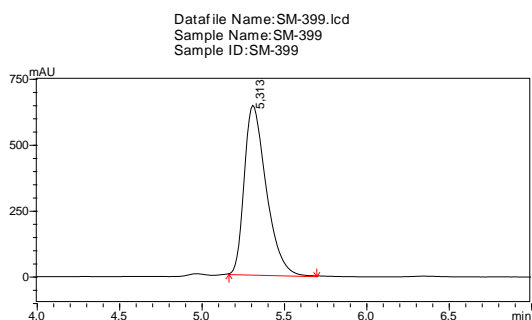

| Peaks | Retention time (min) | Area    | Area%   |
|-------|----------------------|---------|---------|
| 1     | 5,313                | 5905695 | 100,000 |
| Total |                      | 5905695 | 100,000 |

**(R)-1-(3-Bromophenyl)-1-oxo-2-phenyl-2-propanyl diisopropylcarbamate, ((R)-21)**

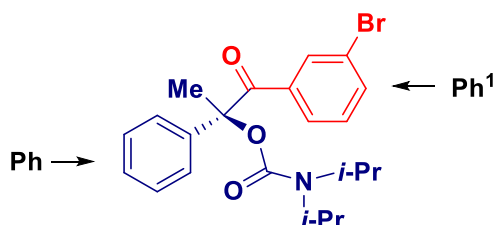

Synthesized according to **GP2** using **(R)-18** (0.073 g, 0.294 mmol, 1.5 equiv); *s*-BuLi 1.4 M (0.022 mL, 0.313 mmol, 1.6 equiv) in CPME (2 mL); and 3-bromo-*N*-methoxy-*N*-methylbenzamide (0.048 g, 0.196 mmol, 1.0 equiv) dissolved in CPME (1 mL); compound **(R)-21** was obtained in 95% yield (0.080 g) as a white solid; mp 94-98 °C.

<sup>1</sup>H NMR (400 MHz, CDCl<sub>3</sub>): δ 7.84 (m, 1H, Ph<sup>1</sup> H-2), 7.64 (m, 1H, Ph<sup>1</sup> H-6), 7.51 (m, 2H, Ph H-2,6), 7.46 (m, 1H, Ph<sup>1</sup> H-4), 7.40 (m, 2H, Ph H-3,5), 7.32 (m, 1H, Ph H-4), 7.11 (m, 2H, Ph<sup>1</sup> H-5), 4.21 (br sept, 1H, CHCH<sub>3</sub>), 3.57 (br sept, 1H, CHCH<sub>3</sub>), 1.97 (s, 3H, CH<sub>3</sub>), 1.32 (d, *J* = 6.7 Hz, 3H, CHCH<sub>3</sub>), 1.28 (d, *J* = 6.8 Hz, 3H, CHCH<sub>3</sub>), 1.12 (d, *J* = 6.7 Hz, 3H, CHCH<sub>3</sub>), 0.85 (d, *J* = 6.7 Hz, 3H, CHCH<sub>3</sub>).

<sup>13</sup>C NMR (100 MHz, CDCl<sub>3</sub>): δ 195.7 (PhC=O), 152.6 (NC=O), 140.5 (Ph C-1), 137.8 (Ph<sup>1</sup> C-1), 134.2 (Ph<sup>1</sup> C-4), 131.9 (Ph<sup>1</sup> C-2), 129.3 (Ph<sup>1</sup> C-5), 129.0 (Ph C-3,5), 127.9 (Ph C-4), 127.5 (Ph<sup>1</sup> C-6), 124.4 (Ph C-2,6), 121.7 (Ph<sup>1</sup> C-3), 86.6 (PhC), 46.7 (CHCH<sub>3</sub>), 46.0 (CHCH<sub>3</sub>), 27.6 (CH<sub>3</sub>), 21.4, 21.2, 20.5, 19.7 (4×CHCH<sub>3</sub>).

HRMS (ESI), *m/z*: calcd. for C<sub>22</sub>H<sub>26</sub>BrNNaO<sub>3</sub> 454.0988[M+Na]<sup>+</sup>; found 454.0997.

[α]<sub>D</sub><sup>+55</sup> (c 0.5, CHCl<sub>3</sub>).

HPLC analysis: Chiralpak IA Column, λ 250 nm, eluent: *n*-hexane / *i*-propanol 90/10. Flow: 1 mL/min

**Racemate**

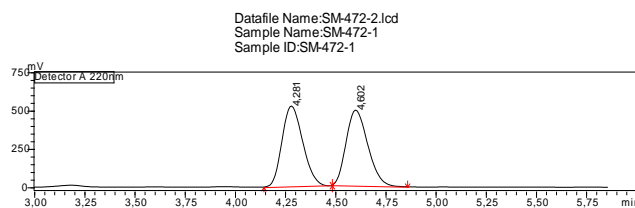

| Peak | Retention time (min) | Area    | Area%   |
|------|----------------------|---------|---------|
| 1    | 4,281                | 3745557 | 50,283  |
| 2    | 4,602                | 3703466 | 49,717  |
| tot  |                      | 7449023 | 100,000 |

### Enantioenriched (R)-21

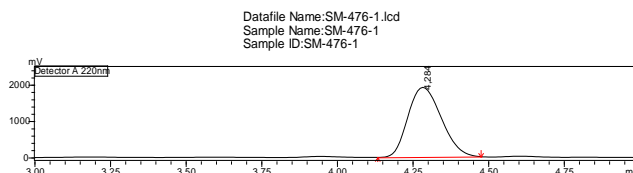

| Peak | Retention time (min) | Area     | Area%   |
|------|----------------------|----------|---------|
| 1    | 4,284                | 14722873 | 100,000 |
| tot  |                      | 14722873 | 100,000 |

### (S)-1-(3-Bromophenyl)-1-oxo-2-phenyl-2-propanyl diisopropylcarbamate, ((S)-21)

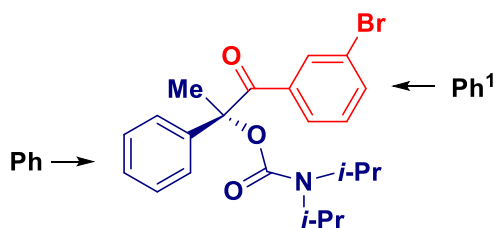

Synthesized according to **GP2** using **(S)-18** (0.073 g, 0.294 mmol, 1.5 equiv); *s*-BuLi 1.4 M (0.022 mL, 0.313 mmol, 1.6 equiv) in CPME (2 mL); and 3-bromo-*N*-methoxy-*N*-methylbenzamide (0.048 g, 0.196 mmol, 1.0 equiv) dissolved in CPME (1 mL); compound **(S)-21** was obtained in 95% yield (0.080 g) as a white solid; mp 94-98 °C.

$[\alpha]_D^{25}$  -78 (c 0.5, CHCl<sub>3</sub>).

**HPLC analysis:** Chiralpak IA Column, λ 250 nm, eluent: *n*-hexane / *i*-propanol 90/10. Flow: 1 mL/min

### Racemate

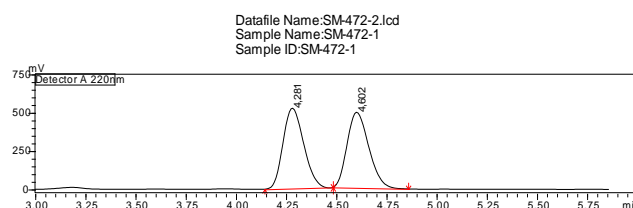



| Peak | Retention time (min) | Area    | Area%   |
|------|----------------------|---------|---------|
| 1    | 4,281                | 3745557 | 50,283  |
| 2    | 4,602                | 3703466 | 49,717  |
| tot  |                      | 7449023 | 100,000 |

### Enantioenriched (S)-21

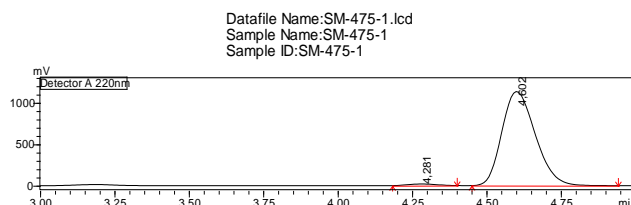

| Peak | Retention time (min) | Area    | Area%   |
|------|----------------------|---------|---------|
| 1    | 4,281                | 125956  | 1,399   |
| 2    | 4,602                | 8874975 | 98,601  |
| tot  |                      | 9000931 | 100,000 |

### (R)-1-Cyclopropyl-1-oxo-2-phenyl-2-propanyl diisopropylcarbamate, ((R)-22)

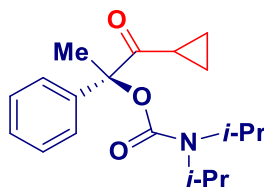

Synthesized according to **GP2** using **(R)-18** (0.073 g, 0.294 mmol, 1.5 equiv); *s*-BuLi 1.4 M (0.022 mL, 0.313 mmol, 1.6 equiv) in CPME (2 mL); and *N*-methoxy-*N*-methylcyclopropanecarboxamide (0.025 g, 0.196 mmol, 1.0 equiv) dissolved in CPME (1 mL); compound **(R)-22** was obtained in 80% yield (0.050 g) as a white solid; mp 100-102 °C.

<sup>1</sup>H NMR (400 MHz, CDCl<sub>3</sub>): δ 7.45 (m, 2H, Ph H-2,6), 7.37 (m, 2H, Ph H-3,5), 7.30 (m, 1H, Ph H-4), 4.20 (br m, 1H, CHCH<sub>3</sub>), 3.89 (br m, 1H, CHCH<sub>3</sub>), 1.93 (m, 1H, Cycprop C-1), 1.86 (s, 3H, CH<sub>3</sub>), 1.35 (br s, 6H, CHCH<sub>3</sub>), 1.29 (br s, 6H, CHCH<sub>3</sub>), 1.08 (m, 1H, Cycprop H-2), 0.86 (m, 1H, Cycprop H-3), 0.80 (m, 1H, Cycprop H-2), 0.59 (m, 1H, Cycprop H-3).

<sup>13</sup>C NMR (100 MHz, CDCl<sub>3</sub>): δ 206.6 (C=O), 153.3 (NC=O), 140.4 (Ph C-1), 128.5 (Ph C-3,5), 127.1 (Ph C-4), 125.1 (Ph C-2,6), 87.0 (PhC), 46.4 (CHCH<sub>3</sub>), 46.3 (CHCH<sub>3</sub>), 24.3 (CH<sub>3</sub>), 21.4 (CHCH<sub>3</sub> 2x), 20.6 (CHCH<sub>3</sub>), 20.4 (CHCH<sub>3</sub>), 16.0 (Cycprop C-1), 11.8 (Cycprop C-3), 10.9 (Cycprop C-2).

HRMS (ESI),  $m/z$ : calcd. for  $C_{19}H_{28}NO_3$  318.2064[M+H]<sup>+</sup>; found 318.2069.

$[\alpha]_D^{+93}$  (c 0.5,  $CHCl_3$ ).

HPLC analysis: Chiralpak IA Column,  $\lambda$  250 nm, eluent: *n*-heptane / MTBE 80/20. Flow: 1 mL/min

### Racemate

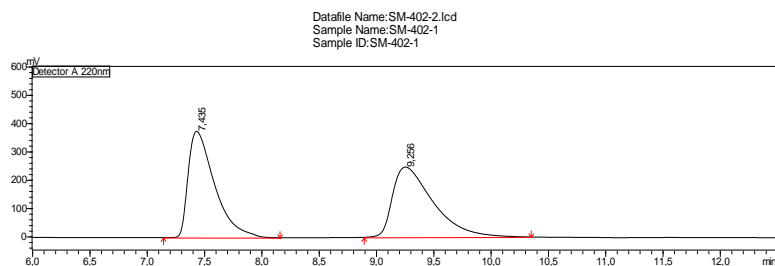

| Peaks | Retention time (min) | Area     | Area%   |
|-------|----------------------|----------|---------|
| 1     | 7,435                | 6023582  | 49,660  |
| 2     | 9,256                | 6106021  | 50,340  |
| Total |                      | 12129604 | 100,000 |

### Enantioenriched (R)-22

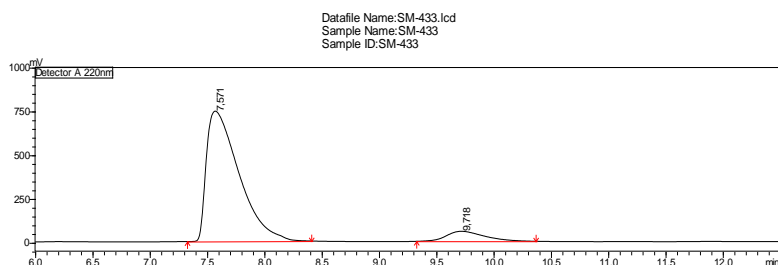

| Peaks | Retention time (min) | Area     | Area%   |
|-------|----------------------|----------|---------|
| 1     | 7,571                | 14716518 | 91,831  |
| 2     | 9,718                | 1309054  | 8,169   |
| Total |                      | 16025572 | 100,000 |

### (S)-1-Cyclopropyl-1-oxo-2-phenyl-2-propanyl diisopropylcarbamate, ((S)-22)

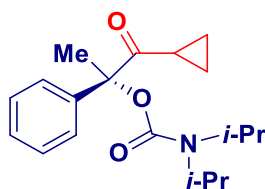

Synthesized according to **GP2** using **(S)-18** (0.073 g, 0.294 mmol, 1.5 equiv); *s*-BuLi 1.4 M (0.022 mL, 0.313 mmol, 1.6 equiv) in CPME (2 mL); and *N*-methoxy-*N*-methylcyclopropanecarboxamide (0.025 g, 0.196 mmol, 1.0 equiv) dissolved in CPME (1 mL); compound **(S)-22** was obtained in 78% yield (0.048 g) as a white solid; mp 100-102 °C.

$[\alpha]_D -85$  (c 0.5, CHCl<sub>3</sub>).

**HPLC analysis:** Chiralpak IA Column, λ 250 nm, eluent: *n*-heptane / MTBE 80/20. Flow: 1 mL/min

### Racemate

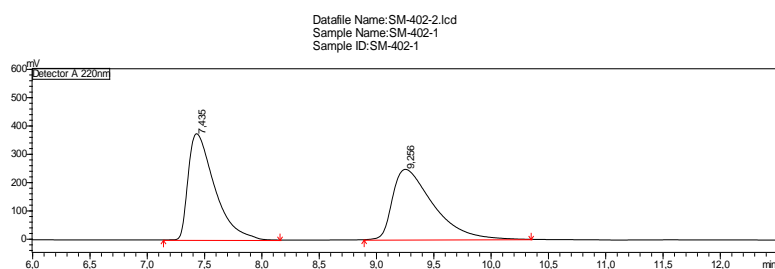

| Peaks | Retention time (min) | Area     | Area%   |
|-------|----------------------|----------|---------|
| 1     | 7,435                | 6023582  | 49,660  |
| 2     | 9,256                | 6106021  | 50,340  |
| Total |                      | 12129604 | 100,000 |

### Enantioenriched (S)-22

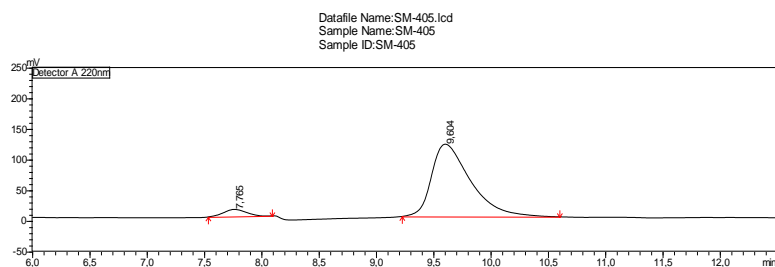

| Peaks | Retention time (min) | Area    | Area%   |
|-------|----------------------|---------|---------|
| 1     | 7,765                | 157785  | 5,357   |
| 2     | 9,604                | 2787352 | 94,643  |
| Total |                      | 2945138 | 100,000 |

**(S)-1-Oxo-1,2-diphenyl-2-propanyl diisopropylcarbamate, ((S)-23)**

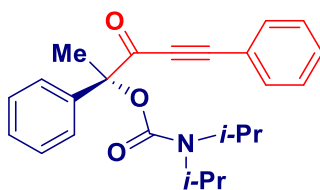

Synthesized according to **GP2** using **(R)-18** (0.073 g, 0.294 mmol, 1.5 equiv); *s*-BuLi 1.4 M (0.022 mL, 0.313 mmol, 1.6 equiv) in CPME (2 mL); and *N*-methoxy-*N*-methyl-3-phenyl-2-propynamide (0.037 g, 0.196 mmol, 1.0 equiv) dissolved in CPME (1 mL); compound **(S)-23** was obtained in 93% yield (0.069 g) as a white solid; mp 96-99 °C.

**<sup>1</sup>H NMR** (400 MHz, CDCl<sub>3</sub>): δ 7.57 (m, 2H, Ph H-2,6), 7.42 (m, 2H, Ph<sup>1</sup> H-2,6), 7.40 (m, 2H, Ph H-3,5), 7.38 (m, 1H, Ph<sup>1</sup> H-4), 7.32 (m, 1H, Ph H-4), 7.31 (m, 2H, Ph<sup>1</sup> H-3,5), 4.13 (br m, 1H, CHCH<sub>3</sub>), 3.96 (br m, 1H, CHCH<sub>3</sub>), 2.01 (s, 3H, CH<sub>3</sub>), 1.37 (m, 6H, CHCH<sub>3</sub>), 1.25 (m, 3H, CHCH<sub>3</sub>), 1.24 (m, 3H, CHCH<sub>3</sub>).

**<sup>13</sup>C NMR** (100 MHz, CDCl<sub>3</sub>): δ 184.1 (PhC=O), 153.6 (NC=O), 138.8 (Ph C-1), 132.6 (Ph<sup>1</sup> C-2,6), 130.2 (Ph<sup>1</sup> C-4), 128.6 (Ph C-3,5), 128.4 (Ph<sup>1</sup> C-3,5), 128.1 (Ph C-4), 125.6 (Ph C-2,6), 120.4 (Ph<sup>1</sup> C-1), 91.9 (PhC≡C), 86.4 (CH<sub>3</sub>-C), 85.6 (PhC≡C), 46.5 (CHCH<sub>3</sub>), 46.2 (CHCH<sub>3</sub>), 23.27 (CH<sub>3</sub>), 21.4 (2×CHCH<sub>3</sub>), 20.8 (CHCH<sub>3</sub>), 20.4 (CHCH<sub>3</sub>).

**HRMS** (ESI), *m/z*: calcd. for C<sub>19</sub>H<sub>28</sub>NO<sub>3</sub> 378.2064 [M+H]<sup>+</sup>; found 378.2066.

**[α]<sub>D</sub>** -73 (c 0.5, CHCl<sub>3</sub>). *Inversion of configuration*. The absolute configuration has been assigned based on the crystal structure of **(S,S)-24** together with the trend observed in signs of optical rotation of **19**, **20**, **21** and **22**.

**Racemate**

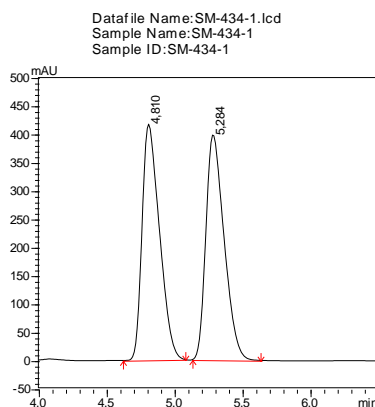

| Peaks | Retention time (min) | Area    | Area%   |
|-------|----------------------|---------|---------|
| 1     | 4,810                | 3704234 | 49,979  |
| 2     | 5,284                | 3707346 | 50,021  |
| Total |                      | 7411580 | 100,000 |

### Enantioenriched (S)-23

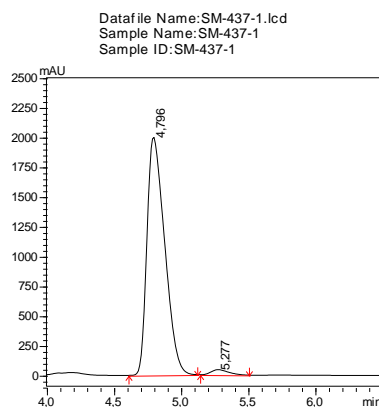

| Peaks | Retention time (min) | Area     | Area%   |
|-------|----------------------|----------|---------|
| 1     | 4,796                | 18384539 | 97,925  |
| 2     | 5,277                | 389507   | 2,075   |
| total |                      | 18774046 | 100,000 |

### (R)-1-Oxo-1,2-diphenyl-2-propynyl diisopropylcarbamate, ((R)-23)

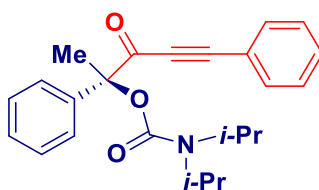

Synthesized according to **GP2** using **(S)-18** (0.073 g, 0.294 mmol, 1.5 equiv); *s*-BuLi 1.4 M (0.022 mL, 0.313 mmol, 1.6 equiv) in CPME (2 mL); and *N*-methoxy-*N*-methyl-3-phenyl-2-propynamide (0.037 g, 0.196 mmol, 1.0 equiv) dissolved in CPME (1 mL); compound **(R)-23** was obtained in 90% yield (0.067 g) as a white solid; mp 96-99 °C.

$[\alpha]_D^{+94}$  (*c* 0.5, CHCl<sub>3</sub>). *Inversion of configuration*. The absolute configuration has been assigned based on the crystal structure of **(R,R)-24** together with the trend observed in signs of optical rotation of **19**, **20**, **21** and **22**.

HPLC analysis: Chiralpak IA Column,  $\lambda$  250 nm, eluent: *n*-hexane / *i*-propanol 80/20. Flow: 1 mL/min

**Racemate**

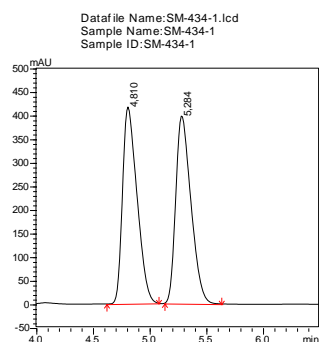

| Peaks | Retention time (min) | Area    | Area%   |
|-------|----------------------|---------|---------|
| 1     | 4,810                | 3704234 | 49,979  |
| 2     | 5,284                | 3707346 | 50,021  |
| total |                      | 7411580 | 100,000 |

**Enantioenriched (R)-23**

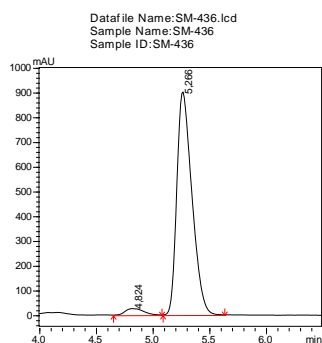

| Peaks | Retention time (min) | Area    | Area%   |
|-------|----------------------|---------|---------|
| 1     | 4,824                | 281017  | 3,258   |
| 2     | 5,266                | 8343898 | 96,742  |
| total |                      | 8624915 | 100,000 |

**(2S,3S)-5-[Methoxy(methyl)amino]-5-oxo-2,3-diphenyl-2-pentanyl diisopropylcarbamate, ((S,S)-24)**

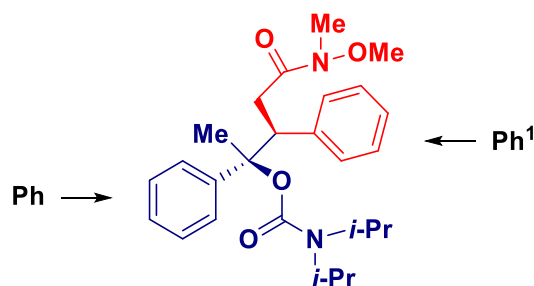

Synthesized according to **GP2** using **(R)-18** (0.073 g, 0.294 mmol, 1.5 equiv); *s*-BuLi 1.4 M (0.022 mL, 0.313 mmol, 1.6 equiv) in CPME (2 mL); and (2*E*)-*N*-methoxy-*N*-methyl-3-phenylacrylamide (0.037 g, 0.196 mmol, 1.0 equiv) dissolved in CPME (1 mL); compound **(S,S)-24** was obtained in 98% yield (0.085 g) as a white solid; mp 110-115 °C.

**<sup>1</sup>H NMR** (400 MHz, CDCl<sub>3</sub>): δ 7.27 (m, 2H, Ph H-3,5), 7.20 (m, 1H, Ph H-4), 7.19 (m, 1H, Ph<sup>1</sup> H-4), 7.18 (m, 4H, Ph<sup>1</sup> H-3,5; Ph H-2,6), 7.06 (m, 2H, Ph<sup>1</sup> H-2,6), 4.15 (br s, 1H, CHCH<sub>3</sub>), 3.81 (dd, 1H, *J* = 11.3 Hz, 3.4 Hz, CHPh<sup>1</sup>), 3.58 (br s, 1H, CHCH<sub>3</sub>), 3.49 (s, 3H, OCH<sub>3</sub>), 2.96 (dd, 1H, *J* = 15.8 Hz, 11.3 Hz, CH<sub>2</sub>C=O), 2.95 (s, 3H, NCH<sub>3</sub>), 2.67 (dd, 1H, *J* = 15.8 Hz, 3.4 Hz, CH<sub>2</sub>C=O), 1.96 (s, 3H, CH<sub>3</sub>), 1.16-1.18 (br, 12H, CH(CH<sub>3</sub>)<sub>2</sub>).

**<sup>13</sup>C NMR** (100 MHz, CDCl<sub>3</sub>): δ 172.4 (CH<sub>2</sub>C=O), 152.9 (NC=O), 143.9 (Ph C-1), 139.6 (Ph<sup>1</sup> C-1), 130.2 (Ph<sup>1</sup> C-2,6), 127.6 (Ph C-3,5), 127.4 (Ph<sup>1</sup> C-3,5), 126.7 (Ph C-4; Ph<sup>1</sup> C-4), 125.7 (Ph C-2,6), 84.4 (Ph-C), 61.0 (OCH<sub>3</sub>), 53.1 (Ph<sup>1</sup>CH), 46.3 (CHCH<sub>3</sub>), 45.2 (CHCH<sub>3</sub>), 32.7 (CH<sub>2</sub>C=O), 32.0 (NCH<sub>3</sub>), 22.3 (CCH<sub>3</sub>), 21.1 (2×CH<sub>3</sub>), 20.7 (CH<sub>3</sub>), 20.5 (CH<sub>3</sub>).

**HRMS** (ESI), *m/z*: calcd. for C<sub>26</sub>H<sub>36</sub>N<sub>2</sub>NaO<sub>4</sub> 463.2567 [M+Na]<sup>+</sup>; found 463.2571.

**[α]<sub>D</sub>** +12 (*c* 0.5, CHCl<sub>3</sub>). *Inversion of configuration*

**HPLC analysis:** Chiralpak IA Column, λ 250 nm, eluent: *n*-hexane / *i*-propanol 80/20. Flow: 1 mL/min

**Diastereoisomeric mixture**

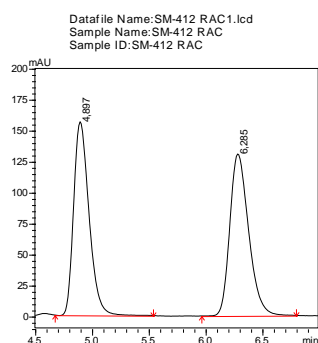

| Peaks | Retention time (min) | Area    | Area%   |
|-------|----------------------|---------|---------|
| 1     | 4,897                | 1466979 | 49,441  |
| 2     | 6,285                | 1500171 | 50,559  |
| Total |                      | 2967151 | 100,000 |

### Diastereoisomer (*S,S*)-24

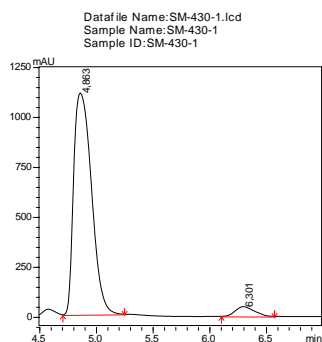

| Peaks | Retention time (min) | Area     | Area%   |
|-------|----------------------|----------|---------|
| 1     | 4,863                | 12125322 | 95,636  |
| 2     | 6,301                | 553349   | 4,364   |
| Total |                      | 12678671 | 100,000 |

### (*2R,3R*)-5-[Methoxy(methyl)amino]-5-oxo-2,3-diphenyl-2-pentanyl diisopropylcarbamate, (*(R,R)*-24)

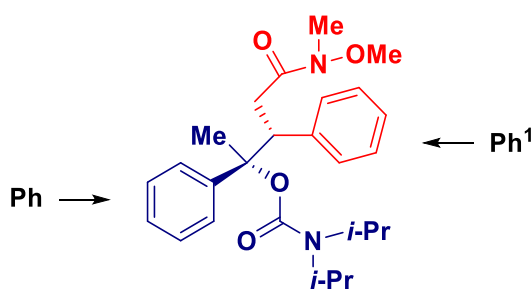

Synthesized according to **GP2** using (**S**)-**18** (0.073 g, 0.294 mmol, 1.5 equiv); *s*-BuLi 1.4 M (0.022 mL, 0.313 mmol, 1.6 equiv) in CPME (2 mL); and (*2E*)-*N*-methoxy-*N*-methyl-3-phenylacrylamide (0.037 g, 0.196 mmol, 1.0 equiv) dissolved in CPME (1 mL); compound (**R,R**)-**24** was obtained in 98% yield (0.085 g) as a white solid; mp 115-118 °C.

$[\alpha]_D -6$  (c 0.5, CHCl<sub>3</sub>).

**HPLC analysis:** Chiralpak IA Column,  $\lambda$  250 nm, eluent: *n*-hexane / *i*-propanol 80/20. Flow: 1 mL/min



### Diastereoisomeric mixture

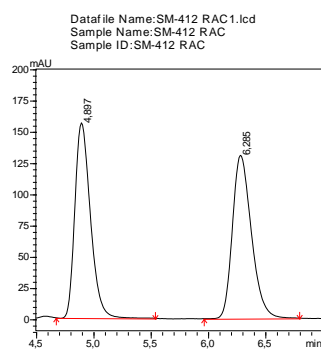

| Peaks | Retention time (min) | Area    | Area%   |
|-------|----------------------|---------|---------|
| 1     | 4,897                | 1466979 | 49,441  |
| 2     | 6,285                | 1500171 | 50,559  |
| Total |                      | 2967151 | 100,000 |

### Diastereoisomer (R,R)-24

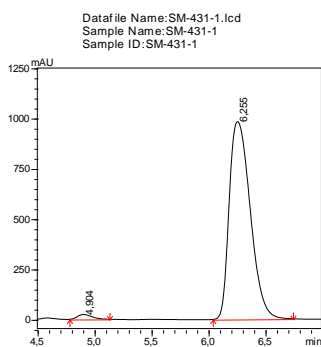

| Peaks | Retention time (min) | Area     | Area%   |
|-------|----------------------|----------|---------|
| 1     | 4,904                | 213573   | 1,665   |
| 2     | 6,255                | 12614540 | 98,335  |
| Total |                      | 12828113 | 100,000 |

**(2*S*,3*S*)-3-(4-Bromophenyl)-5-[methoxy(methyl)amino]-5-oxo-2-phenyl-2-pentanyl diisopropylcarbamate, ((*S,S*)-25)**

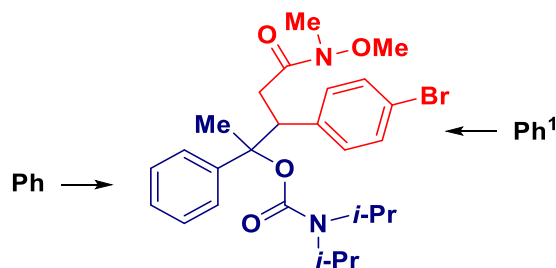

Synthesized according to **GP2** using **(*R*)-18** (0.073 g, 0.294 mmol, 1.5 equiv); *s*-BuLi 1.4 M (0.022 mL, 0.313 mmol, 1.6 equiv) in CPME (2 mL); and (*2E*)-3-(4-bromophenyl)-*N*-methoxy-*N*-methylacrylamide (0.053 g, 0.196 mmol, 1.0 equiv) dissolved in CPME (1 mL); compound **(*S,S*)-25** was obtained in 98% yield (0.100g) as a white solid; mp 122-140 °C.

**<sup>1</sup>H NMR** (400 MHz, CDCl<sub>3</sub>): δ 7.30 (m, 2H, Ph<sup>1</sup> H-3,5), 7.26 (m, 2H, Ph H-3,5), 7.20 (m, 1H, Ph H-4), 7.14 (m, 2H, Ph H-2,6), 6.90 (m, 2H, Ph<sup>1</sup> H-2,6), 4.14 (br s, 1H, CHCH<sub>3</sub>), 3.77 (dd, H, *J* = 11.4 Hz, 3.3 Hz, CHPh<sup>1</sup>), 3.77 (m, 1H, CH<sub>2</sub>C=O), 3.59 (br s, 1H, CHCH<sub>3</sub>), 3.51 (s, 3H, OCH<sub>3</sub>), 2.96 (s, 3H, NCH<sub>3</sub>), 2.68 (dd, 1H, *J* = 16.0 Hz, 3.3 Hz, CH<sub>2</sub>C=O), 1.94 (s, 3H, CH<sub>3</sub>), 1.17-1.18 (br, 12H, CH(CH<sub>3</sub>)<sub>2</sub>).

**<sup>13</sup>C NMR** (100 MHz, CDCl<sub>3</sub>): δ 172.1 (CH<sub>2</sub>C=O), 152.7 (NC=O), 143.5 (Ph C-1), 138.7 (Ph<sup>1</sup> C-1), 131.8 (Ph<sup>1</sup> C-2,6), 130.5 (Ph<sup>1</sup> C-3,5), 127.7 (Ph C-3,5), 126.8 (Ph C-4), 125.6 (Ph C-2,6), 120.7 (Ph<sup>1</sup> C-4), 84.6 (PhC), 61.1 (OCH<sub>3</sub>), 52.6 (Ph<sup>1</sup>CH), 46.4 (CHCH<sub>3</sub>), 45.3 (CHCH<sub>3</sub>), 32.5 (CH<sub>2</sub>C=O), 32.0 (NCH<sub>3</sub>), 22.4 (CCH<sub>3</sub>), 21.2 (2×CH<sub>3</sub>), 20.7 (CH<sub>3</sub>), 20.4 (CH<sub>3</sub>).

**HRMS** (ESI), *m/z*: calcd. for C<sub>26</sub>H<sub>35</sub>BrN<sub>2</sub>NaO<sub>4</sub> 541.1672[M+Na]<sup>+</sup>; found 541.1664.

**[α]<sub>D</sub>** +56 (*c* 0.5, CHCl<sub>3</sub>).

**HPLC analysis:** Chiralpak IA Column, λ 220 nm, eluent: *n*-hexane / *i*-propanol 80/20. Flow: 1 mL/min

**Diastereoisomeric mixture**

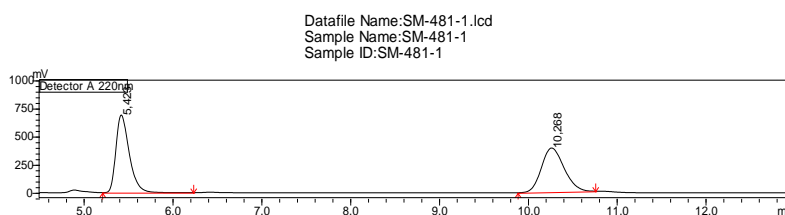

| Peaks | Retention time (min) | Area    | Area%   |
|-------|----------------------|---------|---------|
| 1     | 5,423                | 691695  | 51,012  |
| 2     | 10,268               | 391880  | 48,988  |
| Total |                      | 1083574 | 100,000 |

### Diastereoisomer (S,S)-25

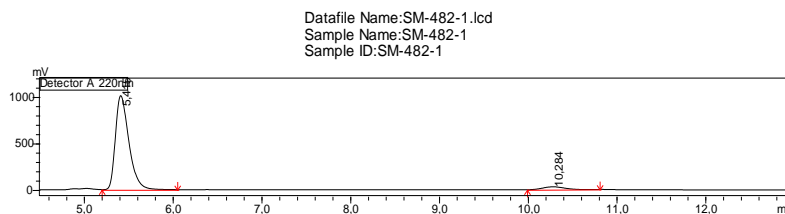

| Peaks | Retention time (min) | Area    | Area%   |
|-------|----------------------|---------|---------|
| 1     | 5,415                | 1011734 | 95,486  |
| 2     | 10,284               | 30599   | 4,514   |
| Total |                      | 1042333 | 100,000 |

### (2R,3R)-3-(4-Bromophenyl)-5-[methoxy(methyl)amino]-5-oxo-2-phenyl-2-pentanyl diisopropylcarbamate, ((R,R)-25)

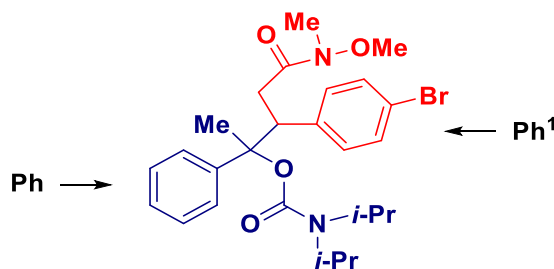

Synthesized according to **GP2** using **(S)-18** (0.073 g, 0.294 mmol, 1.5 equiv); *s*-BuLi 1.4 M (0.022 mL, 0.313 mmol, 1.6 equiv) in CPME (2 mL); and (2*E*)-3-(4-bromophenyl)-*N*-methoxy-*N*-methylacrylamide (0.053 g, 0.196 mmol, 1.0 equiv) dissolved in CPME (1 mL); compound **(R,R)-25** was obtained in 98% yield (0.100 g) as a white solid; mp 122-140 °C.

$[\alpha]_D$ -18 (c 0.5, CHCl<sub>3</sub>)

**HPLC analysis:** Chiralpak IA Column, λ 220 nm, eluent: *n*-hexane / *i*-propanol 80/20. Flow: 1 mL/min

### Diastereomeric mixture

Datafile Name:SM-481-1.lcd  
Sample Name:SM-481-1  
Sample ID:SM-481-1

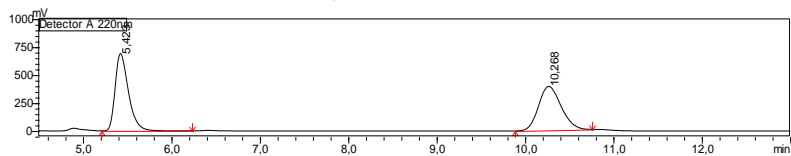

| Peaks | Retention time (min) | Area    | Area%   |
|-------|----------------------|---------|---------|
| 1     | 5,423                | 691695  | 51,012  |
| 2     | 10,268               | 391880  | 48,988  |
| Total |                      | 1083574 | 100,000 |

### Diastereoisomer (R,R)-25

Datafile Name:SM-483-1.lcd  
Sample Name:SM-483-1  
Sample ID:SM-483-1

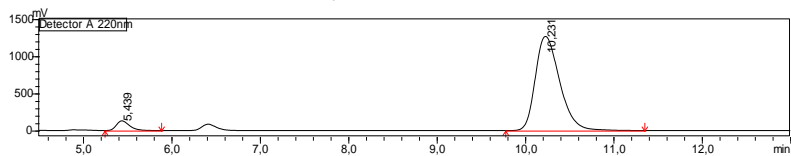

| Peaks | Retention time (min) | Area    | Area%   |
|-------|----------------------|---------|---------|
| 1     | 5,439                | 130421  | 5,299   |
| 2     | 10,231               | 1265716 | 94,701  |
| Total |                      | 1396136 | 100,000 |

**(2R)-1-[Methoxy(methyl)amino]-1,4-diphenyl-1-[(trimethylsilyl)oxy]-2-butanyldiisopropyl carbamate, (27)**

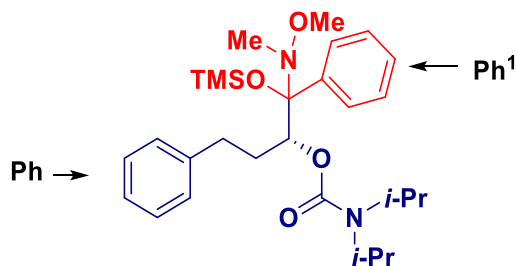

By following the **GP1**, a solution of **1** (0.200 g, 0.76 mmol, 1.5 equiv) and (-)-sparteine (0.190 g, 0.811 mmol, 1.6 equiv) was cooled at -78 °C under argon in CPME (4 mL). A solution of *s*-BuLi (1.3 M, 0.62 mL, 0.811 mmol, 1.6 equiv) was added dropwise; the reaction mixture was stirred for 30 min, then *N*-methoxy-*N*-methylbenzamide (0.083 g, 0.506 mmol, 1.0 equiv) in CPME was added slowly; After 2 hours a solution of Im-TMS (1-(trimethylsilyl)imidazole) (0.107 g, 0.76 mmol, 1.5 equiv) was added and the reaction mixture was allowed to reach room temperature over 2 hours and then quenched with NaHCO<sub>3</sub> 5% solution (5 mL). The crude was purified by chromatography on allumina III grade (hexane/AcOEt) to obtain the pure product as mixture of two stereoisomers. Compound **27** was obtained in 55% yield (0.139 g) as transparent oil.

Major diastereoisomers:

<sup>1</sup>H NMR (400 MHz, C<sub>6</sub>D<sub>6</sub>): δ 7.81 (m, 1H, Ph<sup>1</sup> H-2), 7.63 (m, 1H, Ar), 7.30-6.95 (m, 8H, Ar), 5.88 (m, 1H, CHCH<sub>2</sub>), 3.98 (m, 1H, CHCH<sub>3</sub>), 3.39 (m, 1H, CHCH<sub>3</sub>), 3.17 (s, 3H, OCH<sub>3</sub>), 2.80 (m, 1H, PhCH<sub>2</sub>), 2.71 (m, 1H, PhCH<sub>2</sub>), 2.39 (m, 1H, CH<sub>2</sub>CH), 2.30 (s, 3H, NCH<sub>3</sub>), 1.78 (m, 1H, CH<sub>2</sub>CH), 1.45-0.76 (m, 12H, CHCH<sub>3</sub>), 0.49 (s, 9H, Si(CH<sub>3</sub>)<sub>3</sub>).

<sup>13</sup>C NMR (100 MHz, C<sub>6</sub>D<sub>6</sub>): δ 154.4 (NC=O), 143.0 (Ph C-1), 141.3 (Ph<sup>1</sup> C-1), 129.2 (Ar), 128.7 (Ar), 128.34 (Ar), 127.2 (Ar), 126.1 (Ph C-4), 128.7 (Ph<sup>1</sup> C-2), 97.7 (COTMS), 76.8 (CHCH<sub>2</sub>), 58.4 (OCH<sub>3</sub>), 46.1 (CHCH<sub>3</sub>), 45.4 (CHCH<sub>3</sub>), 36.1 (NCH<sub>3</sub>), 35.3 (CH<sub>2</sub>CH), 33.0 (PhCH<sub>2</sub>), 21.1, 21.0, 20.8 (CH(CH<sub>3</sub>)<sub>2</sub>), 2.92 (Si(CH<sub>3</sub>)<sub>3</sub>).

<sup>15</sup>N NMR (40 MHz, CDCl<sub>3</sub>): δ -212.0.

Minor diastereoisomers:

<sup>1</sup>H NMR (400 MHz, C<sub>6</sub>D<sub>6</sub>): δ 7.86 (m, 1H, Ar), 7.63 (m, 1H, Ar), 7.30-6.95 (m, 8H, Ar), 6.05 (m, 1H, CHCH<sub>2</sub>), 4.37 (m, 1H, CHCH<sub>3</sub>), 3.39 (m, 1H, CHCH<sub>3</sub>), 3.55 (s, 3H, OCH<sub>3</sub>), 2.82 (m, 1H, PhCH<sub>2</sub>), 2.61 (m, 1H, PhCH<sub>2</sub>), 2.37 (s, 3H, NCH<sub>3</sub>), 2.23 (m, 1H, CH<sub>2</sub>CH), 1.50 (m, 1H, CH<sub>2</sub>CH), 1.45-0.76 (m, 12H, CHCH<sub>3</sub>), 0.37 (s, 9H, Si(CH<sub>3</sub>)<sub>3</sub>).

$^{13}\text{C}$  NMR (100 MHz,  $\text{CDCl}_3$ ):  $\delta$  154.1 ( $\text{NC}=\text{O}$ ), 142.8 (Ph C-1), 141.2 ( $\text{Ph}^1$  C-1), 129.0 (Ar), 128.8 (Ar), 127.9 (Ar), 127.5 (Ar), 126.0 (Ph C-4), 97.3 ( $\text{COTMS}$ ), 73.6 ( $\text{CHCH}_2$ ), 59.2 ( $\text{OCH}_3$ ), 46.6 ( $\text{CHCH}_3$ ), 45.3 ( $\text{CHCH}_3$ ), 36.3 ( $\text{NCH}_3$ ), 34.8 ( $\text{CH}_2\text{CH}$ ), 32.8 ( $\text{PhCH}_2$ ), 21.1, 21.0, 20.8 ( $\text{CH}(\text{CH}_3)_2$ ), 2.86 ( $\text{Si}(\text{CH}_3)_3$ ).

$^{15}\text{N}$  NMR (40 MHz,  $\text{CDCl}_3$ ):  $\delta$  -212.1.

HRMS (ESI),  $m/z$ : calcd. for  $\text{C}_{28}\text{H}_{44}\text{N}_2\text{NaO}_4\text{Si}$  523.2963 [ $\text{M}+\text{Na}$ ] $^+$ ; found 523.2974.

**(2S)-1-[Methoxy(methyl)amino]-1,4-diphenyl-1-[(trimethylsilyl)oxy]-2-butanyl diisopropylcarbamate, (28)**

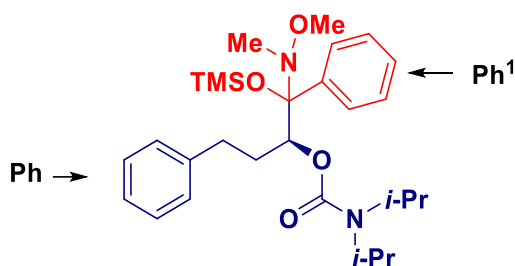

By following the **GP1**, a solution of **1** (0.200 g, 0.76 mmol, 1.5 equiv) and (+)-sparteine (0.190 g, 0.811 mmol, 1.6 equiv) was cooled at  $-78$  °C under argon in CPME (4 mL). A solution of *s*-BuLi (1.3 M, 0.62 mL, 0.811 mmol, 1.6 equiv) was added dropwise; the reaction mixture was stirred for 30 min, then *N*-methoxy-*N*-methylbenzamide (0.083 g, 0.506 mmol, 1.0 equiv) in CPME was added slowly; After 2 hours a solution of Im-TMS (1-(trimethylsilyl)imidazole) (0.107 g, 0.76 mmol, 1.5 equiv) was added and the reaction mixture was allowed to reach room temperature over 2 hours and then quenched with  $\text{NaHCO}_3$  5% solution (5 mL). The crude was purified by chromatography on allumina III grade (hexane/ $\text{AcOEt}$ ) to obtain the pure product as mixture of two stereoisomers. Compound **28** was obtained in 59% yield (0.149 g) as transparent oil.

Spectroscopic data are corresponding to compound **27**.

NO HPLC analysis available.

**(2R)-1-Hydroxy-4-phenyl-1-(1H-pyrrol-1-yl)-1-[4-(trifluoromethyl)phenyl]-butan-2-yl diisopropylcarbamate, (30)**

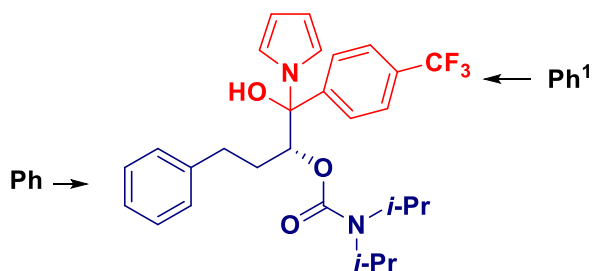

By following the **GP1**, a solution of **1** (0.153 g, 0.583 mmol, 1.5 equiv) and (-)-sparteine (0.146 g, 0.622 mmol, 1.6 equiv) was cooled at -78 °C under argon in CPME (3.3 mL). A solution of *s*-BuLi (1.3 M, 0.48 mL, 0.622 mmol, 1.6 equiv) was added dropwise; the reaction mixture was stirred for 30 min, then (1H-pyrrol-1-yl)(4-(trifluoromethyl)phenyl)methanone **29** (0.093 g, 0.389 mmol, 1.0 equiv) in CPME was added slowly; After 3 hours the reaction mixture was quenched with acetic acid (0.05 mL). The crude was purified by chromatography on silica gel (hexane/AcOEt) to obtain the pure product. Compound **30a** was obtained in 40% yield (0.078 g) as transparent oil and **30b** was obtained in 42% yield (0.082 g) as transparent oil.

**30a**

<sup>1</sup>H NMR (400 MHz, C<sub>6</sub>D<sub>6</sub>): δ 7.32 (m, 2H, Ph<sup>1</sup> H-2,6), 7.22 (m, 2H, Ph<sup>1</sup> H-3,5), 7.07 (m, 2H, Ph H-3,5), 7.05 (m, 2H, Py H-2,5), 7.00 (m, 1H, Ph H-4), 6.98 (m, 2H, Ph H-2,6), 6.30 (m, 2H, Py H-3,4), 5.78 (d, *J* = 9.3 Hz, 1H, CHCH<sub>2</sub>), 4.82 (br s, 1H, OH), 3.56 (m, 2H, CHCH<sub>3</sub>), 2.67 (m, 1H, PhCH<sub>2</sub>), 2.57 (m, 1H, PhCH<sub>2</sub>), 2.11 (m, 1H, CH<sub>2</sub>CH), 1.84 (m, 1H, CH<sub>2</sub>CH), 1.09 (br s, 6H, CH<sub>3</sub>), 0.76 (br s, 6H, CH<sub>3</sub>).

<sup>13</sup>C NMR (100 MHz, C<sub>6</sub>D<sub>6</sub>): δ 154.8 (NC=O), 145.5 (Ph<sup>1</sup> C-1), 141.3 (Ph C-1), 130.6 (q, *J* = 32.3 Hz, Ph<sup>1</sup> C-4), 128.8 (Ph C-3,5), 128.7 (Ph C-2,6), 126.9 (Ph<sup>1</sup> C-2,6), 126.5 (Ph C-4), 125.3 (q, *J* = 3.8 Hz, Ph<sup>1</sup> C-3,5), 124.7 (q, *J* = 272.2 Hz, CF<sub>3</sub>), 119.3 (Pyr C-2,5), 109.5 (Pyr C-3,4), 89.7 (COH), 77.8 (CHCH<sub>2</sub>), 46.5 (CH(CH<sub>3</sub>)<sub>2</sub>), 46.5 (CH(CH<sub>3</sub>)<sub>2</sub>), 32.5 (PhCH<sub>2</sub>), 32.0 (CH<sub>2</sub>CH), 21.0, 20.8, 20.5, 20.4 (4×CH(CH<sub>3</sub>)<sub>2</sub>).

<sup>15</sup>N NMR (40 MHz, C<sub>6</sub>D<sub>6</sub>): δ -202.9 (Py N).

<sup>19</sup>F NMR (376 MHz, C<sub>6</sub>D<sub>6</sub>): δ -62.3 (CF<sub>3</sub>).

HRMS (ESI), *m/z*: calcd. for C<sub>28</sub>H<sub>33</sub>F<sub>3</sub>N<sub>2</sub>NaO<sub>3</sub> 525.2335 [M+Na]<sup>+</sup>; found 525.2341

[α]<sub>D</sub> + 112 (c 0.5, CH<sub>2</sub>Cl<sub>2</sub>).

**30b**

**<sup>1</sup>H NMR** (400 MHz, C<sub>6</sub>D<sub>6</sub>): δ 7.40 (m, 2H, Ph<sup>1</sup> H-2,6), 7.29 (m, 2H, Ph<sup>1</sup> H-3,5), 7.12 (m, 2H, Ph H-3,5), 7.05 (m, 2H, Ph H-2,6), 7.04 (m, 1H, Ph H-4), 6.90 (m, 2H, Py H-2,5), 6.29 (m, 2H, Py H-3,4), 5.79 (br d, *J* = 9.8 Hz, 1H, CHCH<sub>2</sub>), 4.41 (br s, 1H, OH), 3.72 (m, 1H, CHCH<sub>3</sub>), 3.36 (m, 1H, CHCH<sub>3</sub>), 2.71-2.54 (m, 2H, PhCH<sub>2</sub>), 1.99-1.80 (m, 2H, CH<sub>2</sub>CH), 1.11 (d, *J* = 6.0 Hz, 3H, CH<sub>3</sub>), 1.07 (d, *J* = 6.6 Hz, 3H, CH<sub>3</sub>), 0.76 (m, *J* = 6.0 Hz, 6H, CH<sub>3</sub>).

**<sup>13</sup>C NMR** (100 MHz, C<sub>6</sub>D<sub>6</sub>): δ 154.6 (NC=O), 146.0 (Ph<sup>1</sup> C-1), 141.3 (Ph C-1), 130.5 (q, *J* = 32.3 Hz, Ph<sup>1</sup> C-4), 128.9 (Ph C-3,5), 128.8 (Ph C-2,6), 127.7 (Ph<sup>1</sup> C-2,6), 126.5 (Ph C-4), 125.0 (q, *J* = 3.8 Hz, Ph<sup>1</sup> C-3,5), 124.8 (q, *J* = 272.0 Hz, CF<sub>3</sub>), 119.6 (Py C-2,5), 109.4 (Py C-3,4), 89.2 (COH), 77.2 (CHCH<sub>2</sub>), 46.5 (CH(CH<sub>3</sub>)<sub>2</sub>), 46.1 (CH(CH<sub>3</sub>)<sub>2</sub>), 32.7 (PhCH<sub>2</sub>), 32.5 (CH<sub>2</sub>CH), 20.8 (2× CH(CH<sub>3</sub>)<sub>2</sub>), 20.5, 20.3 (2×CH(CH<sub>3</sub>)<sub>2</sub>).

**<sup>15</sup>N NMR** (40 MHz, C<sub>6</sub>D<sub>6</sub>): δ -204.3 (Py N).

**<sup>19</sup>F NMR** (376 MHz, C<sub>6</sub>D<sub>6</sub>): δ -62.3 (CF<sub>3</sub>).

**HRMS** (ESI), *m/z*: calcd. for C<sub>28</sub>H<sub>33</sub>F<sub>3</sub>N<sub>2</sub>NaO<sub>3</sub> 525.2335 [M+Na]<sup>+</sup>; found 525.2341.

**HPLC analysis:** Chiralpak IA Column, λ 254 nm, eluent: *n*-hexane / *i*-propanol 98/02. Flow:1 mL/min

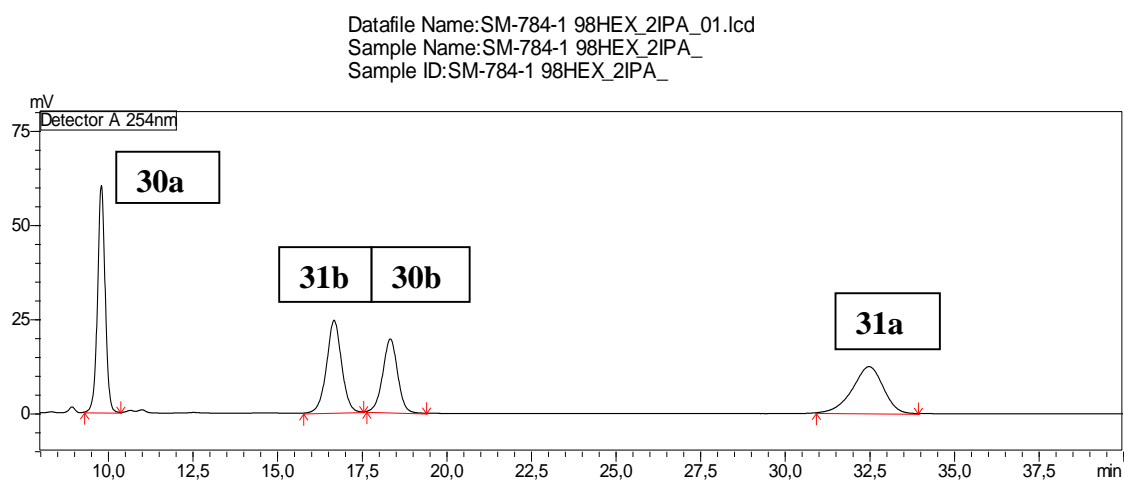

| Peaks | Ret.T  | Area    | Area%   |
|-------|--------|---------|---------|
| 1     | 9,812  | 941572  | 30,775  |
| 2     | 16,689 | 751662  | 24,568  |
| 3     | 18,350 | 586898  | 19,183  |
| 4     | 32,497 | 779407  | 25,475  |
| Total |        | 3059539 | 100,000 |



Datafile Name: SM-787-1 FR 30-36\_98HEX\_2IPA\_01.lcd  
 Sample Name: SM-787-1 FR 30-36\_98HEX\_2IPA\_  
 Sample ID: SM-787-1 FR 30-36\_98HEX\_2IPA\_

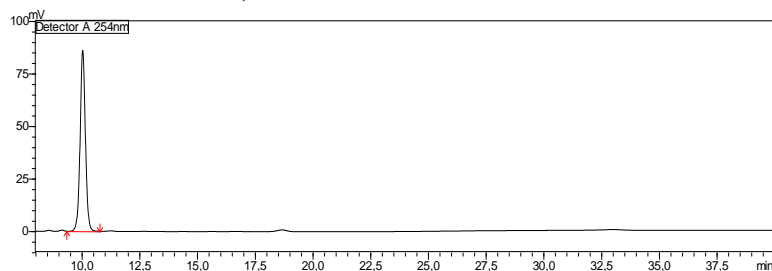

| Peaks | Ret.T  | Area    | Area%   |
|-------|--------|---------|---------|
| 1     | 10,046 | 1371801 | 100,000 |
| total |        | 1371801 | 100,000 |

30b

Datafile Name: SM-787-1 FR 42-49\_98HEX\_2IPA\_01.lcd  
 Sample Name: SM-787-1 FR 42-49\_98HEX\_2IPA\_  
 Sample ID: SM-787-1 FR 42-49\_98HEX\_2IPA\_

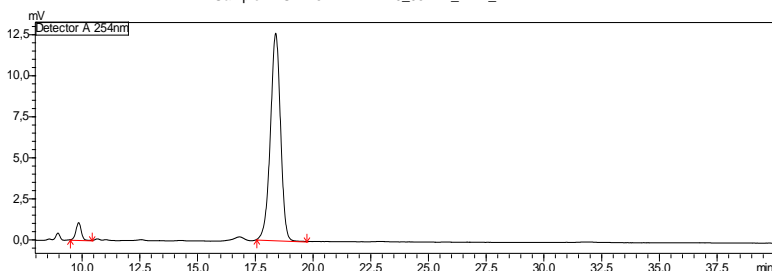

| Peaks | Ret.T  | Area   | Area%   |
|-------|--------|--------|---------|
| 1     | 9,871  | 16606  | 4,146   |
| 2     | 18,406 | 383957 | 95,854  |
| total |        | 400563 | 100,000 |

**(2S)-1-Hydroxy-4-phenyl-1-(1H-pyrrol-1-yl)-1-[4-(trifluoromethyl)phenyl]-butan-2-yl diisopropylcarbamate, (31)**

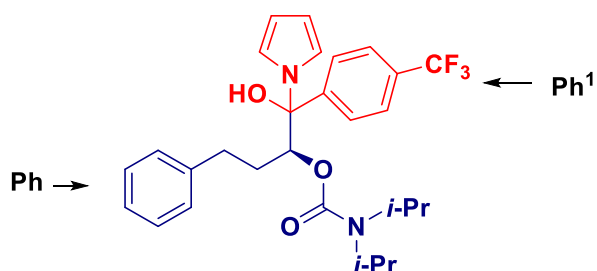

By following the **GP1**, a solution of **1** (0.153 g, 0.583 mmol, 1.5 equiv) and (+)-sparteine (0.146 g, 0.622 mmol, 1.6 equiv) was cooled at -78 °C under argon in CPME (3.3 mL). A solution of *s*-BuLi (1.3 M, 0.48

mL, 0.622 mmol, 1.6 equiv) was added dropwise; the reaction mixture was stirred for 30 min, then (1H-pyrrol-1-yl)(4-(trifluoromethyl)phenyl)methanone **29** (0.093 g, 0.389 mmol, 1.0 equiv) in CPME was added slowly; After 3 hours the reaction mixture was quenched with acetic acid (0.05 mL). The crude was purified by chromatography on silica gel (hexane/AcOEt) to obtain the pure product. Compound **31a** was obtained in 37% yield (0.071 g) as transparent oil and **31b** was obtained in 40% yield (0.078 g) as transparent oil.

### **31a**

**<sup>1</sup>H NMR** (400 MHz, C<sub>6</sub>D<sub>6</sub>): δ 7.32 (m, 2H, Ph<sup>1</sup> H-2,6), 7.22 (m, 2H, Ph<sup>1</sup> H-3,5), 7.07 (m, 2H, Ph H-3,5), 7.05 (m, 2H, Py H-2,5), 7.00 (m, 1H, Ph H-4), 6.98 (m, 2H, Ph H-2,6), 6.30 (m, 2H, Py H-3,4), 5.78 (d, *J* = 9.3 Hz, 1H, CHCH<sub>2</sub>), 4.82 (br s, 1H, OH), 3.56 (m, 2H, CHCH<sub>3</sub>), 2.67 (m, 1H, PhCH<sub>2</sub>), 2.57 (m, 1H, PhCH<sub>2</sub>), 2.11 (m, 1H, CH<sub>2</sub>CH), 1.84 (m, 1H, CH<sub>2</sub>CH), 1.09 (br s, 6H, CH<sub>3</sub>), 0.76 (br s, 6H, CH<sub>3</sub>).

**<sup>13</sup>C NMR** (100 MHz, C<sub>6</sub>D<sub>6</sub>): δ 154.8 (NC=O), 145.5 (Ph<sup>1</sup> C-1), 141.3 (Ph C-1), 130.6 (q, *J* = 32.3 Hz, Ph<sup>1</sup> C-4), 128.8 (Ph C-3,5), 128.7 (Ph C-2,6), 126.9 (Ph<sup>1</sup> C-2,6), 126.5 (Ph C-4), 125.3 (q, *J* = 3.8 Hz, Ph<sup>1</sup> C-3,5), 124.7 (q, *J* = 272.2 Hz, CF<sub>3</sub>), 119.3 (Pyr C-2,5), 109.5 (Pyr C-3,4), 89.7 (COH), 77.8 (CHCH<sub>2</sub>), 46.5 (CH(CH<sub>3</sub>)<sub>2</sub>), 46.5 (CH(CH<sub>3</sub>)<sub>2</sub>), 32.5 (PhCH<sub>2</sub>), 32.0 (CH<sub>2</sub>CH), 21.0, 20.8, 20.5, 20.4, (4×CH(CH<sub>3</sub>)<sub>2</sub>).

**<sup>15</sup>N NMR** (40 MHz, C<sub>6</sub>D<sub>6</sub>): δ -202.9 (Py N).

**<sup>19</sup>F NMR** (376 MHz, C<sub>6</sub>D<sub>6</sub>): δ -62.3 (CF<sub>3</sub>).

**HRMS** (ESI), *m/z*: calcd. for C<sub>28</sub>H<sub>33</sub>F<sub>3</sub>N<sub>2</sub>NaO<sub>3</sub> 525.2335 [M+Na]<sup>+</sup>; found 525.2341.

[α]<sub>D</sub> - 164 (c 0.5, CH<sub>2</sub>Cl<sub>2</sub>).

### **31b**

**<sup>1</sup>H NMR** (400 MHz, C<sub>6</sub>D<sub>6</sub>): δ 7.40 (m, 2H, Ph<sup>1</sup> H-2,6), 7.29 (m, 2H, Ph<sup>1</sup> H-3,5), 7.12 (m, 2H, Ph H-3,5), 7.05 (m, 2H, Ph H-2,6), 7.04 (m, 1H, Ph H-4), 6.90 (m, 2H, Py H-2,5), 6.29 (m, 2H, Py H-3,4), 5.79 (br d, *J* = 9.8 Hz, 1H, CHCH<sub>2</sub>), 4.41 (br s, 1H, OH), 3.72 (m, 1H, CHCH<sub>3</sub>), 3.36 (m, 1H, CHCH<sub>3</sub>), 2.71-2.54 (m, 2H, PhCH<sub>2</sub>), 1.99-1.80 (m, 2H, CH<sub>2</sub>CH), 1.11 (d, *J* = 6.0 Hz, 3H, CH<sub>3</sub>), 1.07 (d, *J* = 6.6 Hz, 3H, CH<sub>3</sub>), 0.76 (m, *J* = 6.0 Hz, 6H, CH<sub>3</sub>).

**<sup>13</sup>C NMR** (100 MHz, C<sub>6</sub>D<sub>6</sub>): δ 154.6 (NC=O), 146.0 (Ph<sup>1</sup> C-1), 141.3 (Ph C-1), 130.5 (q, *J* = 32.3 Hz, Ph<sup>1</sup> C-4), 128.9 (Ph C-3,5), 128.8 (Ph C-2,6), 127.7 (Ph<sup>1</sup> C-2,6), 126.5 (Ph C-4), 125.0 (q, *J* = 3.8 Hz, Ph<sup>1</sup> C-3,5), 124.8 (q, *J* = 272.0 Hz, CF<sub>3</sub>), 119.6 (Py C-2,5), 109.4 (Py C-3,4), 89.2 (COH), 77.2 (CHCH<sub>2</sub>), 46.5 (CH(CH<sub>3</sub>)<sub>2</sub>), 46.1 (CH(CH<sub>3</sub>)<sub>2</sub>), 32.7 (PhCH<sub>2</sub>), 32.5 (CH<sub>2</sub>CH), 20.8 (2×CH(CH<sub>3</sub>)<sub>2</sub>), 20.5, 20.3 (2×CH(CH<sub>3</sub>)<sub>2</sub>).

**<sup>15</sup>N NMR** (40 MHz, C<sub>6</sub>D<sub>6</sub>): δ -204.3 (Py N).

<sup>19</sup>F NMR (376 MHz, C<sub>6</sub>D<sub>6</sub>): δ -62.3 (CF<sub>3</sub>).

HRMS (ESI), *m/z*: calcd. for C<sub>28</sub>H<sub>33</sub>F<sub>3</sub>N<sub>2</sub>NaO<sub>3</sub> 525.2335 [M+Na]<sup>+</sup>; found 525.2341

HPLC analysis: Chiralpak IA Column, λ 254 nm, eluent: *n*-hexane / *i*-propanol 98/02. Flow: 1 mL/min

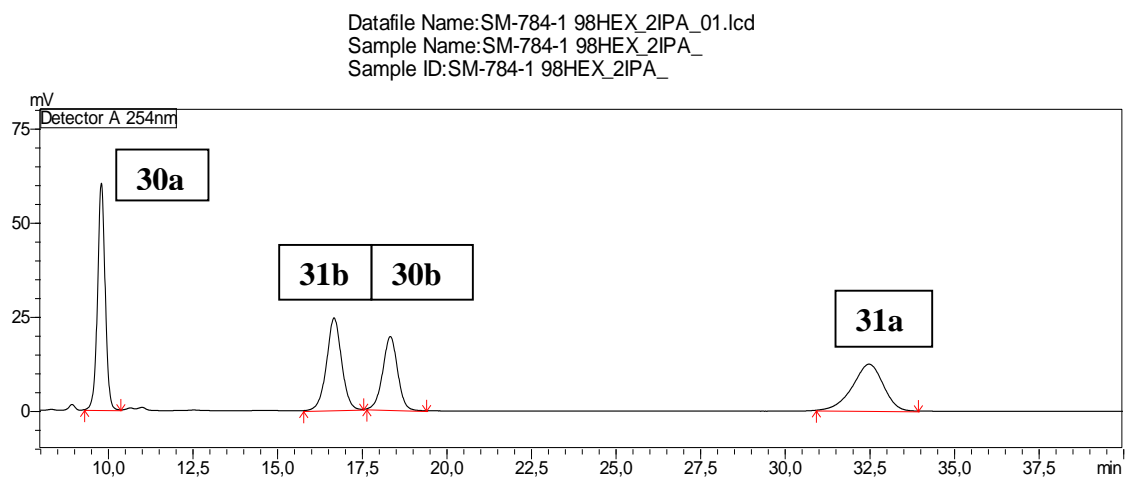

| Peaks | Ret.T  | Area    | Area%   |
|-------|--------|---------|---------|
| 1     | 9,812  | 941572  | 30,775  |
| 2     | 16,689 | 751662  | 24,568  |
| 3     | 18,350 | 586898  | 19,183  |
| 4     | 32,497 | 779407  | 25,475  |
| Total |        | 3059539 | 100,000 |

**31a**

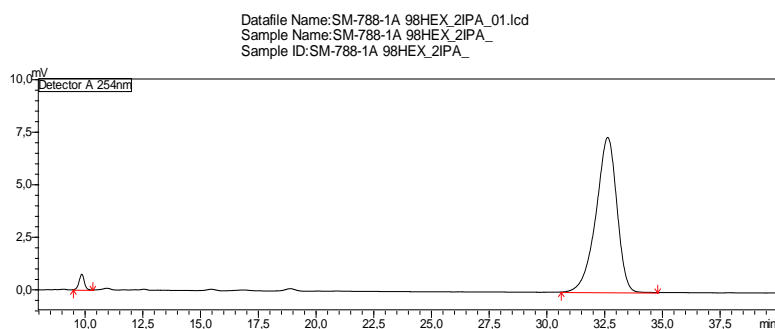

| Peaks | Ret.T | Area  | Area% |
|-------|-------|-------|-------|
| 1     | 9,877 | 11567 | 2,434 |

|       |        |        |         |
|-------|--------|--------|---------|
| 2     | 32,655 | 463702 | 97,566  |
| total |        | 475269 | 100,000 |

**31b**

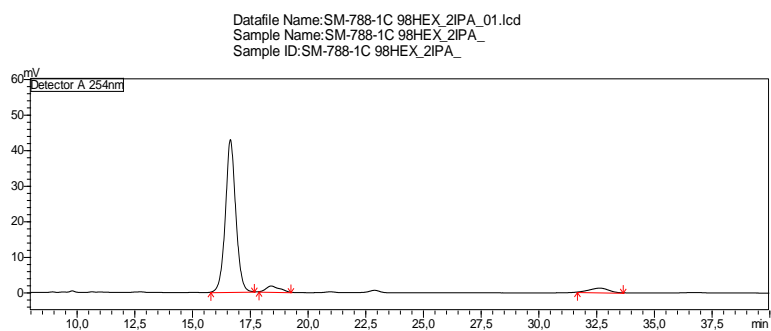

| Peaks | Ret.T  | Area    | Area%   |
|-------|--------|---------|---------|
| 1     | 16,660 | 1337061 | 90,920  |
| 2     | 18,428 | 65906   | 4,482   |
| 3     | 32,654 | 67626   | 4,599   |
| total |        | 1470593 | 100,000 |

**(2R)-2-Methyl-2-propanyl-2-benzoyl-1-pyrrolidinecarboxylate, ((R)-33)**

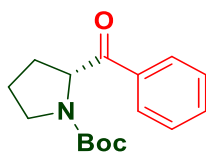

Synthesized according to **GP3** using **32** (0.078 g, 0.454 mmol, 1.5 equiv); (-)-sparteine (0.112 g, 0.485 mmol, 1.6 equiv); *s*-BuLi 1.3 M (0.37 ml, 0.485 mmol, 1.6 equiv) in CPME (3 mL); and *N*-methoxy-*N*-methyl-benzamide (0.050 g, 0.303 mmol, 1.0 equiv) dissolved in CPME (1 mL); compound **(R)-33** was obtained in 85% yield (0.071 g) as a pale yellow solid; mp 64-70 °C. Reaction run in larger scale starting from **32** (1.27 g, 6 mmol, 1.5 equiv); (-)-sparteine (1.5 g, 6.4 mmol, 1.6 equiv); *s*-BuLi 1.4 M (4.57 mL, 6.4 mmol, 1.6 equiv) and *N*-methoxy-*N*-methyl-benzamide (0.660 g, 4 mmol, 1.0 equiv) in CPME (27 mL) allowed to recover CPME (85%, 22.9 mL) and prepare **(R)-33** in comparable yield (80%, 0.880 g). The organic layer from the basic extraction with CPME (30 mL) afforded upon distillation (-)-sparteine (80%, 1.20 g, 1.18 mL), *N*-methyl-*N*-methoxyamine (75%, 3.0 mmol, 0.23 mL) and CPME (88%, 26.4 mL).

*Rotamers ratio* = 60:40

Major rotamer:

**<sup>1</sup>H NMR** (400 MHz, CDCl<sub>3</sub>): δ 7.95 (m, 2H, Ph H-2,6), 7.58 (m, 1H, Ph H-4), 7.48 (m, 2H, Ph H-3,5), 5.19 (dd, *J* = 8.9, 4.0 Hz, 1H, Pyr H-2), 3.72-3.43 (m, 2H, Pyr H-5), 2.32 (m, 1H, Pyr H-3), 1.99-1.87 (m, 2H, Pyr H-4), 1.92 (m, 1H, Pyr H-3), 1.25 (s, 9H, (CH<sub>3</sub>)<sub>3</sub>).

**<sup>13</sup>C NMR** (100 MHz, CDCl<sub>3</sub>): δ 198.9 (C=O), 153.8 (N-C(=O)-O), 135.3 (Ph C-1), 133.2 (Ph C-4), 128.7 (Ph C-3,5), 128.2 (Ph C-2,6), 79.8 ((CH<sub>3</sub>)<sub>3</sub>C<sub>3</sub>O), 61.3 (Pyr C-2), 46.6 (Pyr C-5), 30.8 (Pyr C-3), 28.2 ((CH<sub>3</sub>)<sub>3</sub>), 23.5 (Pyr C-4).

Minor rotamer:

**<sup>1</sup>H NMR** (400 MHz, CDCl<sub>3</sub>): δ 7.98 (m, 2H, Ph H-2,6), 7.55 (m, 1H, Ph H-4), 7.44 (m, 2H, Ph H-3,5), 5.33 (m, 1H, Pyr H-2), 3.71-3.44 (m, 2H, Pyr H-5), 2.28 (m, 1H, Pyr H-3), 1.99-1.87 (m, 2H, Pyr H-4), 1.91 (m, 1H, Pyr H-3), 1.46 (s, 9H, (CH<sub>3</sub>)<sub>3</sub>).

**<sup>13</sup>C NMR** (100 MHz, CDCl<sub>3</sub>): δ 198.4 (C=O), 154.4 (N-C(=O)-O), 135.1 (Ph C-1), 133.1 (Ph C-4), 128.6 (Ph C-3,5), 128.5 (Ph C-2,6), 79.6 ((CH<sub>3</sub>)<sub>3</sub>C<sub>3</sub>O), 61.1 (Pyr C-2), 46.8 (Pyr C-5), 29.8 (Pyr C-3), 28.5 ((CH<sub>3</sub>)<sub>3</sub>), 24.1 (Pyr C-4).

**HRMS** (ESI), *m/z*: calcd. for C<sub>16</sub>H<sub>21</sub>NNaO<sub>3</sub>: 298.1414 [M+Na]<sup>+</sup>; found: 298.1415.

$[\alpha]_D = +26.50$  (*c* 0.5,  $\text{CHCl}_3$ ) *lit.*<sup>4</sup>  $+28.10$  (*c* 1.35,  $\text{CHCl}_3$ ).

**HPLC analysis:** Chiralpak IA Column,  $\lambda$  254 nm, eluent: *n*-hexane / *i*-propanol 90/10. Flow: 1 mL/min

### Racemate

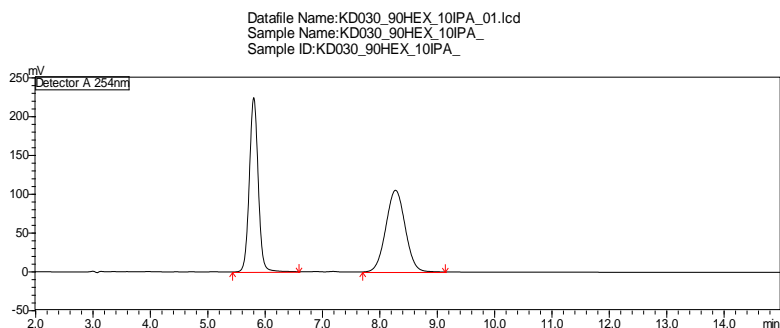

| Peaks | Retention time (min) | Area    | Area%   |
|-------|----------------------|---------|---------|
| 1     | 5,810                | 2410041 | 49,432  |
| 2     | 8,282                | 2465392 | 50,568  |
| total |                      | 4875433 | 100,000 |

### Enantioenriched (R)-33

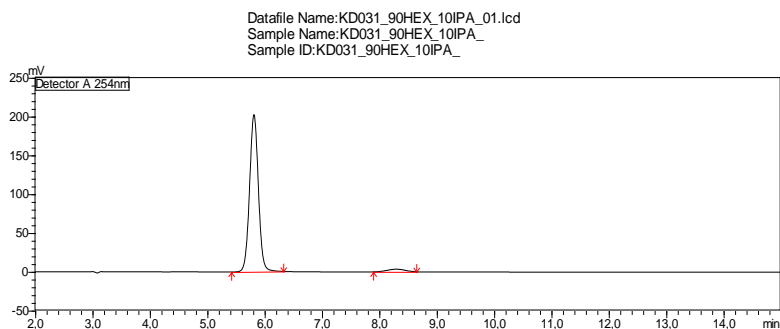

| Peaks | Retention time (min) | Area    | Area%   |
|-------|----------------------|---------|---------|
| 1     | 5,814                | 2158925 | 96,697  |
| 2     | 8,295                | 73753   | 3,303   |
| total |                      | 2232678 | 100,000 |

### (2S)-2-Methyl-2-propanyl 2-benzoyl-1-pyrrolidinecarboxylate, ((S)-33)

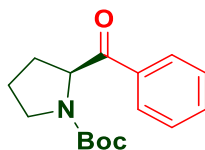

Synthesized according to **GP3** using **32** (0.078 g, 0.454 mmol, 1.5 equiv); (+)-sparteine (0.112 g, 0.485 mmol, 1.6 equiv); *s*-BuLi 1.3 M (0.37 ml, 0.485 mmol, 1.6 equiv) in CPME (3 mL); and *N*-methoxy-*N*-

methyl-benzamide (0.050 g, 0.303 mmol, 1.0 equiv) dissolved in CPME (1 mL); compound **(S)**-**33** was obtained in 88% yield (0.073 g) as a pale yellow solid; mp 64-70 °C. Reaction run in larger scale starting from **32** (1.27 g, 6 mmol, 1.5 equiv); (+)-sparteine (1.5 g, 6.4 mmol, 1.6 equiv); *s*-BuLi 1.4 M (4.57 mL, 6.4 mmol, 1.6 equiv) and *N*-methoxy-*N*-methyl-benzamide (0.660 g, 4 mmol, 1.0 equiv) in CPME (27 mL) allowed to recover CPME (90%, 24.3 mL) and prepare **(S)**-**33** in comparable yield (82%, 0.902 g). The organic layer from the basic extraction with CPME (30 mL) afforded upon distillation (+)-sparteine (79%, 1.18 g, 1.16 mL), *N*-methyl-*N*-methoxyamine (60%, 2.4 mmol, 0.15 mL) and CPME (91%, 27.3 mL).

$[\alpha]_D = -34.90$  (*c* 0.5, CHCl<sub>3</sub>) *lit.*<sup>5</sup>  $-63.1$  (*c* 1.02, CHCl<sub>3</sub>)

**HPLC analysis:** Chiralpak IA Column, λ 250 nm, eluent: *n*-hexane / *i*-propanol 90/10. Flow: 1 mL/min

### Racemate

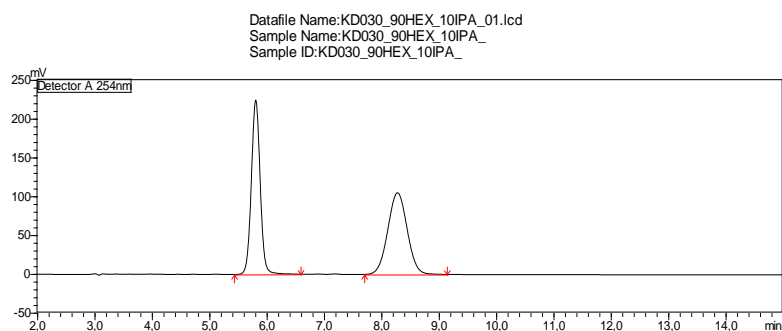

| Peaks | Retention time (min) | Area    | Area%   |
|-------|----------------------|---------|---------|
| 1     | 5,810                | 2410041 | 49,432  |
| 2     | 8,282                | 2465392 | 50,568  |
| total |                      | 4875433 | 100,000 |

### Enantioenriched (S)-33

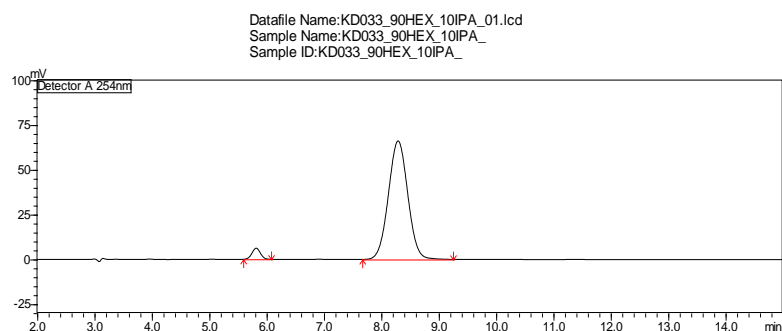

| Peaks | Retention time (min) | Area    | Area%   |
|-------|----------------------|---------|---------|
| 1     | 5,818                | 63844   | 3,948   |
| 2     | 8,292                | 1553393 | 96,052  |
| total |                      | 1617236 | 100,000 |

**(2R)-2-Methyl-2-propanyl 2-(4-cyanobenzoyl)-1-pyrrolidinecarboxylate, ((R)-34)**

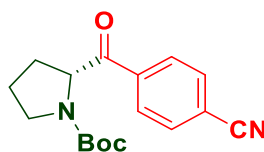

Synthesized according to **GP3** using **32** (0.078 g, 0.454 mmol, 1.5 equiv); (-)-sparteine (0.112 g, 0.485 mmol, 1.6 equiv); *s*-BuLi 1.3 M (0.37 ml, 0.485 mmol, 1.6 equiv) in CPME (3 mL); and 4-cyano-*N*-methoxy-*N*-methyl-benzamide (0.056 g, 0.303 mmol, 1.0 equiv) dissolved in CPME (1 mL); compound **(R)-34** was obtained in 75% yield (0.068 g) as a yellow solid, mp 64-67 °C. Reaction run with (-)-sparteine recovered from preparation of **(R)-33**.

*Rotamers ratio* = 51:49

<sup>1</sup>H NMR (400 MHz, CDCl<sub>3</sub>): δ 8.07-8.02 (m, 2H, Ph H-2,6), 7.80-7.74 (m, 2H, Ph H-3,5), 5.25 (dd, *J* = 9.1, 3.8 Hz, 0.49H, Pyr H-2), 5.13 (dd, *J* = 9.3, 4.5 Hz, 0.51H, Pyr H-2), 3.70-3.44 (m, 2H, Pyr H-5), 2.34-2.28 (m, 1H, Pyr H-3), 2.00-1.87 (m, 2H, Pyr H-4), 1.90-1.86 (m, 1H, Pyr H-3), 1.44 (s, 4.5H, (CH<sub>3</sub>)<sub>3</sub>), 1.24 (s, 4.5H, (CH<sub>3</sub>)<sub>3</sub>).

<sup>13</sup>C NMR (100 MHz, CDCl<sub>3</sub>): δ 197.79 (C=O), 197.76 (C=O), 154.4 (NC=O), 153.4 (NC=O), 138.4 (Ph C-1), 138.3 (Ph C-1), 132.6 (Ph C-3,5), 132.4 (Ph C-3,5), 128.8 (Ph C-2,6), 128.5 (Ph C-2,6), 117.9 (C≡N), 117.7 (C≡N), 116.5 (Ph C-4), 116.3 (Ph C-4), 80.1 ((CH<sub>3</sub>)<sub>3</sub>C=O), 80.0 ((CH<sub>3</sub>)<sub>3</sub>C=O), 61.5 (Pyr C-2), 61.1 (Pyr C-2), 46.7 (Pyr C-5), 46.6 (Pyr C-5), 30.6 (Pyr C-3), 29.5 (Pyr C-3), 28.4 ((CH<sub>3</sub>)<sub>3</sub>), 28.1 ((CH<sub>3</sub>)<sub>3</sub>), 24.3 (Pyr C-4), 23.5 (Pyr C-4).

**HRMS** (ESI), *m/z*: calcd. for C<sub>17</sub>H<sub>20</sub>N<sub>2</sub>NaO<sub>3</sub> 323.1366 [M+Na]<sup>+</sup>; found: 323.1368.

[α]<sub>D</sub> = +8.00 (c 0.5, CHCl<sub>3</sub>)

**HPLC analysis:** Chiralpak IB Column, λ 250 nm, eluent: *n*-hexane / *i*-propanol 95/05. Flow:

1 mL/min

**Racemate**

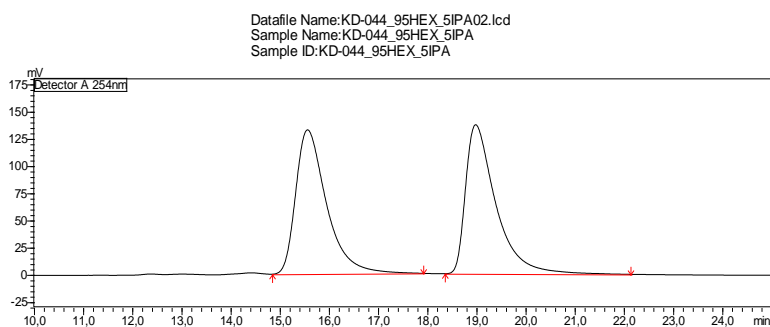



| Peaks | Retention time (min) | Area     | Area%   |
|-------|----------------------|----------|---------|
| 1     | 15,566               | 5774381  | 49,599  |
| 2     | 18,985               | 5867752  | 50,401  |
| total |                      | 11642134 | 100,000 |

### Enantioenriched (R)-34

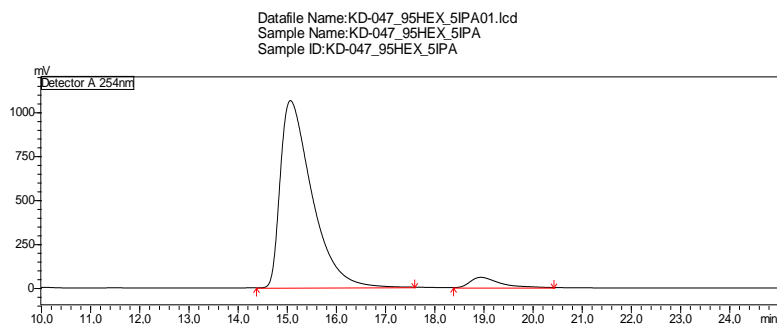

| Peaks | Retention time (min) | Area     | Area%   |
|-------|----------------------|----------|---------|
| 1     | 15,075               | 47467160 | 95,234  |
| 2     | 18,947               | 2375422  | 4,766   |
| total |                      | 49842581 | 100,000 |

### (2S)-2-Methyl-2-propanyl 2-(4-cyanobenzoyl)-1-pyrrolidinecarboxylate, ((S)-34)

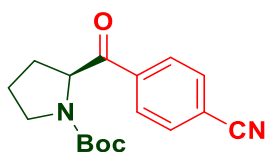

Synthesized according to **GP3** using **32** (0.078 g, 0.454 mmol, 1.5 equiv); (+)-sparteine (0.112 g, 0.485 mmol, 1.6 equiv); *s*-BuLi 1.3 M (0.37 ml, 0.485 mmol, 1.6 equiv) in CPME (3 mL); and 4-cyano-*N*-methoxy-*N*-methyl-benzamide (0.056 g, 0.303 mmol, 1.0 equiv) dissolved in CPME (1 mL); compound **(S)-34** was obtained in 81% yield (0.074 g) as a yellow solid, mp 64-67 °C. Reaction run with (+)-sparteine recovered from preparation of **(S)-33**.

$[\alpha]_D = -18.66$  (*c* 0.5, CHCl<sub>3</sub>)

**HPLC analysis:** Chiralpak IB Column,  $\lambda$  250 nm, eluent: *n*-hexane / *i*-propanol 95/05. Flow:

1 mL/min

**Racemate**

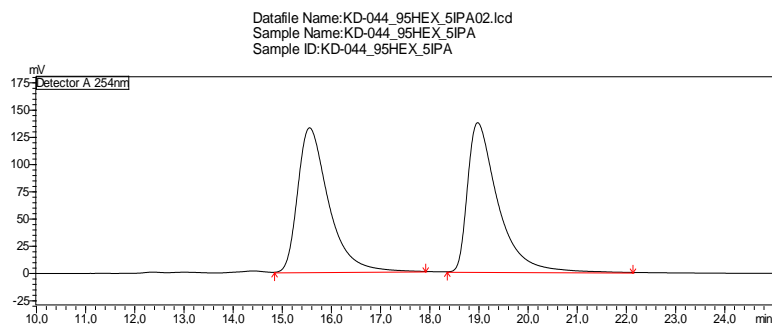

| Peaks | Retention time (min) | Area     | Area%   |
|-------|----------------------|----------|---------|
| 1     | 15,566               | 5774381  | 49,599  |
| 2     | 18,985               | 5867752  | 50,401  |
| total |                      | 11642134 | 100,000 |

### Enantioenriched (S)-34

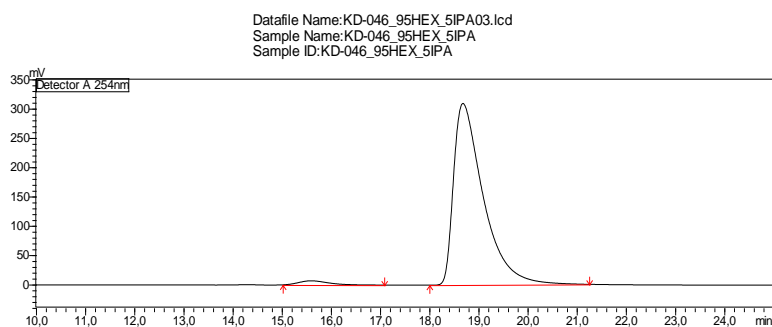

| Peaks | Retention time (min) | Area     | Area%   |
|-------|----------------------|----------|---------|
| 1     | 15,601               | 293721   | 2,206   |
| 2     | 18,686               | 13020658 | 97,794  |
| total |                      | 13314379 | 100,000 |

### (2R)-2-Methyl-2-propanyl 2-(furan-2-ylcarbonyl)pyrrolidine-1-carboxylate, ((R)-35)

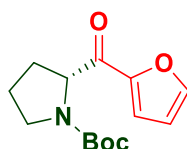

Synthesized according to **GP3** using **32** (0.078 g, 0.454 mmol, 1.5 equiv); (-)-sparteine (0.112 g, 0.485 mmol, 1.6 equiv); *s*-BuLi 1.3 M (0.37 ml, 0.485 mmol, 1.6 equiv) in CPME (3 mL); and *N*-methoxy-*N*-methylfuran-2-carboxamide (0.047 g, 0.303 mmol, 1.0 equiv) dissolved in CPME (1 mL); compound **(R)-35** was obtained in 75% yield (0.060 g) as a brownish solid, mp 68 °C.

Rotamers ratio = 61:39

**<sup>1</sup>H NMR** (400 MHz, CDCl<sub>3</sub>): δ 7.61-7.58 (m, 1H, Fur H-5), 7.26-7.22 (m, 1H, Fur H-3), 6.56-6.52 (m, 1H, Fur H-4), 5.08 (dd, *J* = 8.6, 3.1 Hz, 0.39H, Pyr H-2), 4.90 (dd, *J* = 8.6, 4.6 Hz, 0.61H, Pyr H-2), 3.67-3.42 (m, 2H, Pyr H-5), 2.33-2.23 (m, 1H, Pyr H-3), 2.01-1.88 (m, 3H, Pyr H-3, H-4) 1.45 (s, 3.5H, (CH<sub>3</sub>)<sub>3</sub>), 1.26 (s, 5.5H, (CH<sub>3</sub>)<sub>3</sub>).

**<sup>13</sup>C NMR** (100 MHz, CDCl<sub>3</sub>): δ 188.5 (C=O), 187.8 (C=O), 154.4 (NC=O), 153.7 (NC=O), 151.2 (Fur C-2), 146.5 (Fur C-5), 117.9 (Fur C-3), 117.5 (Fur C-3), 112.2 (Fur C-4), 79.9 ((CH<sub>3</sub>)<sub>3</sub>C=O), 79.7 ((CH<sub>3</sub>)<sub>3</sub>C=O), 61.8 (Pyr C-2), 61.3 (Pyr C-2), 46.9 (Pyr C-5), 46.7 (Pyr C-5), 30.9 (Pyr C-3), 29.8 (Pyr C-3), 28.4 ((CH<sub>3</sub>)<sub>3</sub>), 28.1 ((CH<sub>3</sub>)<sub>3</sub>), 24.2 (Pyr C-4), 23.7 (Pyr C-4).

**HRMS** (ESI), *m/z*: calcd. for C<sub>14</sub>H<sub>19</sub>NNaO<sub>4</sub> 288.1206 [M+Na]<sup>+</sup>; found: 288.1210.

[α]<sub>D</sub> = +50.30 (c 0.5, CHCl<sub>3</sub>).

**HPLC analysis:** Chiralpak IC Column, λ 254 nm, eluent: *n*-hexane / *i*-propanol 85/15. Flow: 1 mL/min

### Racemate

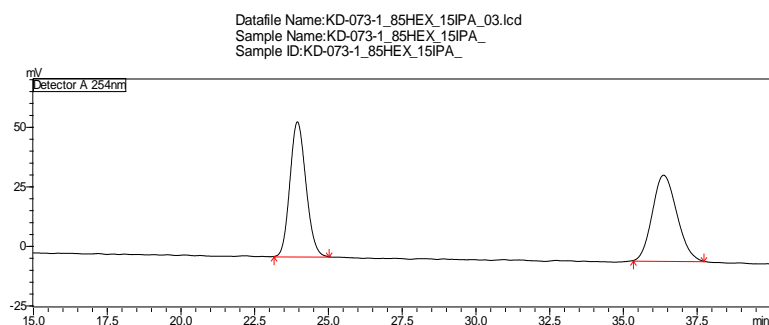

| Peaks | Retention time (min) | Area    | Area%   |
|-------|----------------------|---------|---------|
| 1     | 23,965               | 2135782 | 50,697  |
| 2     | 36,383               | 2077028 | 49,303  |
| total |                      | 4212810 | 100,000 |

### Enantioenriched (R)-35

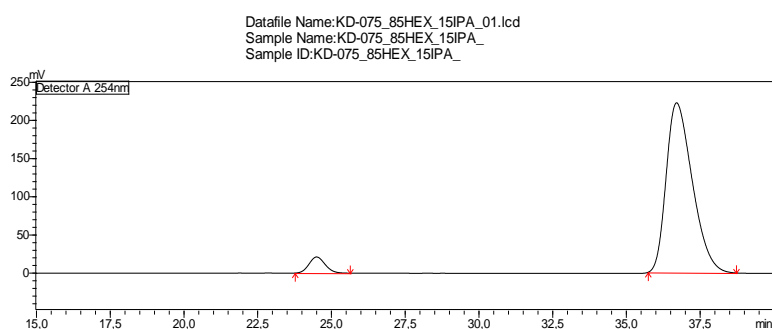

| Peaks | Retention time (min) | Area    | Area%   |
|-------|----------------------|---------|---------|
| 1     | 23,965               | 2135782 | 50,697  |
| 2     | 36,383               | 2077028 | 49,303  |
| total |                      | 4212810 | 100,000 |

|       |        |          |         |
|-------|--------|----------|---------|
| 1     | 24,516 | 799349   | 5,509   |
| 2     | 36,719 | 13709425 | 94,491  |
| total |        | 14508774 | 100,000 |

**(2R)-2-Methyl-2-propanyl 2-((2E)-3-phenyl-prop-2-enoyl)pyrrolidine-1-carboxylate, ((R)-36)**

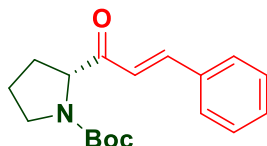

Synthesized according to **GP3** using **32** (0.078 g, 0.454 mmol, 1.5 equiv); (-)-sparteine (0.112 g, 0.485 mmol, 1.6 equiv); *s*-BuLi 1.3 M (0.37 ml, 0.485 mmol, 1.6 equiv) in CPME (3 mL); and (2*E*)-*N*-methoxy-*N*-methyl-3-phenyl-2-propenamide (0.058 g, 0.303 mmol, 1.0 equiv) dissolved in CPME (1 mL); compound **(R)-36** was obtained in 85% yield (0.077 g) as a yellow solid, mp 91-93 °C. Reaction run in larger scale starting from **32** (1.27 g, 6 mmol, 1.5 equiv); (-)-sparteine (1.5 g, 6.4 mmol, 1.6 equiv); *s*-BuLi 1.4 M (4.57 mL, 6.4 mmol, 1.6 equiv) and (2*E*)-*N*-methoxy-*N*-methyl-3-phenyl-2-propenamide (0.764 g, 4 mmol, 1.0 equiv) in CPME (27 mL) allowed to recover CPME (91%, 24.7 mL) and prepare **(R)-36** in comparable yield (80%, 0.964 g). The organic layer from the basic extraction with CPME (30 mL) afforded upon distillation (-)-sparteine (78%, 1.17 g, 1.15 mL), *N*-methyl-*N*-methoxyamine (62%, 2.5 mmol, 0.19 mL) and CPME (94%, 28.1 mL).

Rotamers ratio = 66:34

<sup>1</sup>H NMR (400 MHz, CDCl<sub>3</sub>): δ 7.72-7.65 (m, 1H, PhCH=CH), 7.56-7.54 (m, 2H, Ph H-2,6), 7.40-7.37 (m, 3H, Ph H-3,4,5), 6.85 (d, *J* = 16.0 Hz, 1H, PhCH=CH), 4.68-4.66 (m, 0.34H, Pyr H-2), 4.47 (dd, d, *J* = 8.2, 5.2 Hz, 0.66H, Pyr H-2), 3.61-3.45 (m, 2H, Pyr), 2.29-2.18 (m, 1H, Pyr), 1.94-1.87 (m, 3H, Pyr) 1.48 (s, 3.0H, (CH<sub>3</sub>)<sub>3</sub>), 1.39 (s, 6H, (CH<sub>3</sub>)<sub>3</sub>).

<sup>13</sup>C NMR (100 MHz, CDCl<sub>3</sub>): δ 199.1 (C=O), 198.5 (C=O), 154.5 (NC=O), 154.0 (NC=O), 143.7 (Ph-C=C), 134.6 (Ph C-1), 134.4 (Ph C-1), 130.6 (Ph), 130.4 (Ph), 128.9 (Ph), 128.8 (Ph) 128.3 (PhC=C), 80.1 ((CH<sub>3</sub>)<sub>3</sub>C=O), 79.7 ((CH<sub>3</sub>)<sub>3</sub>C=O), 64.8 (Pyr C-2), 63.8 (Pyr C-2), 46.9 (Pyr), 46.8 (Pyr), 30.5 (Pyr C-4), 29.2 (Pyr), 28.4 ((CH<sub>3</sub>)<sub>3</sub>), 28.1 ((CH<sub>3</sub>)<sub>3</sub>), 24.3 (Pyr), 23.8 (Pyr).

HRMS (ESI), *m/z*: calcd. for C<sub>18</sub>H<sub>23</sub>NNaO<sub>3</sub> 324.1570 [M+Na]<sup>+</sup>; found: 324.1574.

[α]<sub>D</sub> = +75.10 (c 0.5, CHCl<sub>3</sub>).

HPLC analysis: Chiralpak IC Column, λ 250 nm, eluent: *n*-hexane / *i*-propanol 95/05. Flow: 1 mL/min

## Racemate

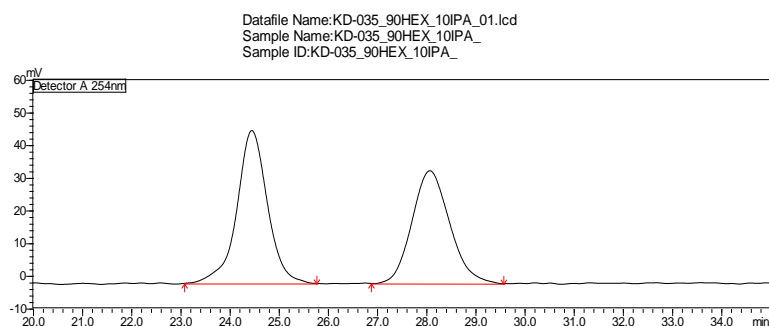

| Peaks | Retention time (min) | Area    | Area%   |
|-------|----------------------|---------|---------|
| 1     | 24,452               | 2021480 | 52,378  |
| 2     | 28,075               | 1837906 | 47,622  |
| total |                      | 3859386 | 100,000 |

## Enantioenriched (R)-36

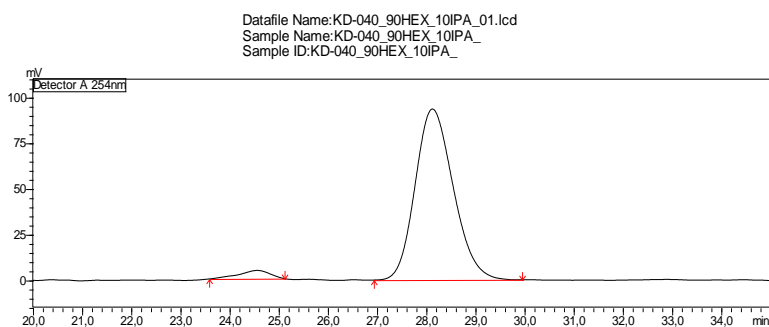

| Peaks | Retention time (min) | Area    | Area%   |
|-------|----------------------|---------|---------|
| 1     | 24,561               | 201734  | 3,857   |
| 2     | 28,126               | 5028918 | 96,143  |
| total |                      | 5230653 | 100,000 |

## (2S)-2-Methyl-2-propanyl 2-((2E)-3-phenyl-prop-2-enoyl)pyrrolidine-1-carboxylate, ((S)-36)

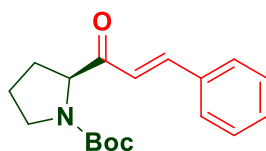

Synthesized according to **GP3** using **32** (0.078 g, 0.454 mmol, 1.5 equiv); (+)-sparteine (0.112 g, 0.485 mmol, 1.6 equiv); *s*-BuLi 1.3 M (0.37 ml, 0.485 mmol, 1.6 equiv) in CPME (3 mL); and *N*-methoxy-*N*-methyl-3-phenyl-2-propenamide (0.058 g, 0.303 mmol, 1.0 equiv) dissolved in CPME (1 mL); Compound (**S**)-**36** was obtained in 83% yield (0.075 g), mp 91-93 °C. Reaction run in larger scale starting from **32** (1.27 g, 6 mmol, 1.5 equiv); (+)-sparteine (1.5 g, 6.4 mmol, 1.6 equiv); *s*-BuLi 1.4 M (4.57 mL,

6.4 mmol, 1.6 equiv) and *N*-methoxy-*N*-methyl-3-phenyl-2-propenamide (0.764 g, 4 mmol, 1.0 equiv) in CPME (27 mL) allowed to recover CPME (89%, 24.0 mL) and prepare (**S**)-**36** in comparable yield (75%, 0.903 g). The organic layer from the basic extraction with CPME (30 mL) afforded upon distillation (+)-sparteine (81%, 1.22 g, 1.2 mL), *N*-methyl-*N*-methoxyamine (64%, 2.6 mmol, 0.2 mL) and CPME (90%, 27.0 mL).

$[\alpha]_D = -53.35$  (c 0.5, CHCl<sub>3</sub>)

**HPLC analysis:** Chiralpak IC Column,  $\lambda$  250 nm, eluent: *n*-hexane / *i*-propanol 95/05. Flow: 1 mL/min

### Racemate

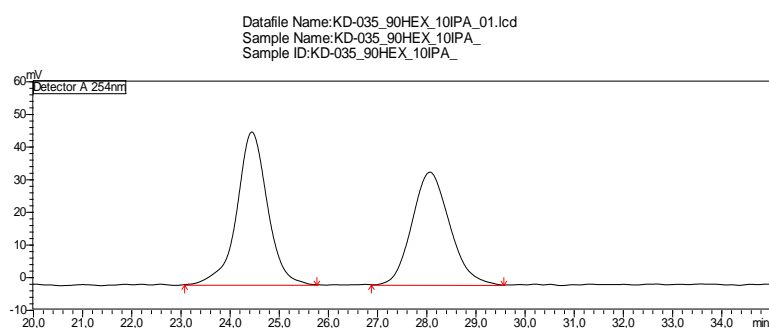

| Peaks | Retention time (min) | Area    | Area%   |
|-------|----------------------|---------|---------|
| 1     | 24,452               | 2021480 | 52,378  |
| 2     | 28,075               | 1837906 | 47,622  |
| total |                      | 3859386 | 100,000 |

### Enantioenriched (S)-36

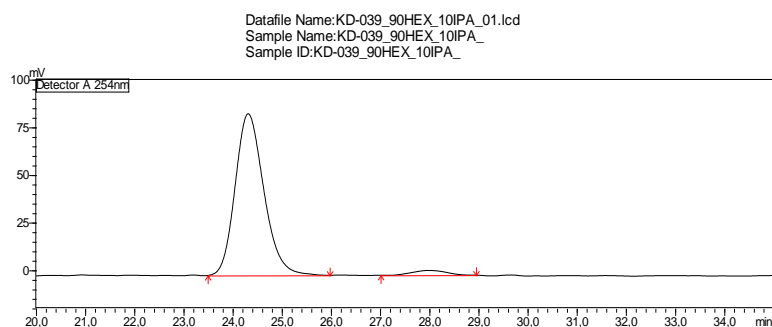

| Peaks | Retention time (min) | Area    | Area%   |
|-------|----------------------|---------|---------|
| 1     | 24,317               | 3441466 | 96,748  |
| 2     | 27,993               | 115676  | 3,252   |
| total |                      | 3557143 | 100,000 |

**(2R)-2-Methyl-2-propanyl 2-(3-phenyl-2-propynoyl)-1-pyrrolidinecarboxylate, ((R)-37)**

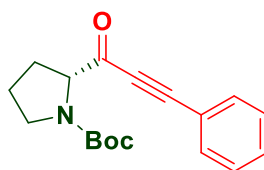

Synthesized according to **GP3** using **32** (0.078 g, 0.454 mmol, 1.5 equiv); (-)-sparteine (0.112 g, 0.485 mmol, 1.6 equiv); *s*-BuLi 1.3 M (0.37 ml, 0.485 mmol, 1.6 equiv) in CPME (3 mL); and *N*-methoxy-*N*-methyl-3-phenyl-2-propynamide (0.057 g, 0.303 mmol, 1.0 equiv) dissolved in CPME (1 mL); compound **(R)-37** was obtained in 80% yield (0.072 g) as a yellow solid, mp 74-75 °C. Reaction run with (-)-sparteine recovered from preparation of **(R)-36**.

*Rotamers ratio* = 74:26

Major isomer:

<sup>1</sup>H NMR (400 MHz, CDCl<sub>3</sub>): δ 7.58-7.52 (m, 2H, Ph H-2,6), 7.48-7.41 (m, 1H, Ph H-4), 7.39-7.33 (m, 2H, Ph H-3,5), 4.30 (dd, *J* = 8.5, 5.3 Hz, 1H, Pyr H-2), 3.60 (m, 2H, Pyr H-5), 2.28 (m, 1H, Pyr H-3), 2.07 (m, 1H, Pyr H-3), 2.02-1.84 (m, 2H, Pyr H-4), 1.40 (s, 9H, (CH<sub>3</sub>)<sub>3</sub>).

<sup>13</sup>C NMR (100 MHz, CDCl<sub>3</sub>): δ 188.6 (C=O), 153.7 (NC=O), 133.3 (Ph C-2,6), 130.9 (Ph C-4), 128.6 (Ph C-3,5), 119.6 (Ph C-1), 93.5 (C≡CPh), 85.6 (C≡CPh), 80.4 ((CH<sub>3</sub>)<sub>3</sub>CO), 66.7 (Pyr C-2), 46.6 (Pyr C-5), 30.7 (Pyr C-3), 28.1 ((CH<sub>3</sub>)<sub>3</sub>), 23.7 (Pyr C-4).

Minor isomer:

<sup>1</sup>H NMR (400 MHz, CDCl<sub>3</sub>): δ 7.58-7.52 (m, 2H, Ph H-2,6), 7.48-7.41 (m, 1H, Ph H-4), 7.39-7.33 (m, 2H, Ph H-3,5), 4.49 (dd, *J* = 8.7, 4.4 Hz, 1H, Pyr H-2), 3.47 (m, 2H, Pyr H-5), 2.22 (m, 1H, Pyr H-3), 2.09 (m, 1H, Pyr H-3), 2.02-1.84 (m, 2H, Pyr H-4), 1.44 (s, 9H, (CH<sub>3</sub>)<sub>3</sub>).

<sup>13</sup>C NMR (100 MHz, CDCl<sub>3</sub>): δ 187.8 (C=O), 154.5 (NC=O), 133.0 (Ph C-2,6), 130.7 (Ph C-4), 128.5 (Ph C-3,5), 119.9 (Ph C-1), 92.9 (C≡CPh), 86.1 (C≡CPh), 79.9 ((CH<sub>3</sub>)<sub>3</sub>CO), 66.5 (Pyr C-2), 46.8 (Pyr C-5), 29.2 (Pyr C-3), 28.4 ((CH<sub>3</sub>)<sub>3</sub>), 24.3 (Pyr C-4).

**HRMS** (ESI), *m/z*: calcd. for C<sub>18</sub>H<sub>21</sub>NNaO<sub>3</sub> 322.1414 [M+Na]<sup>+</sup>; found: 322.1415.

[α]<sub>D</sub> = +116.25 (c 0.5, CHCl<sub>3</sub>).

**HPLC analysis:** Chiralpak IA Column, λ 250 nm, eluent: *n*-hexane / *i*-propanol 95/05. Flow: 1 mL/min

**Racemate**

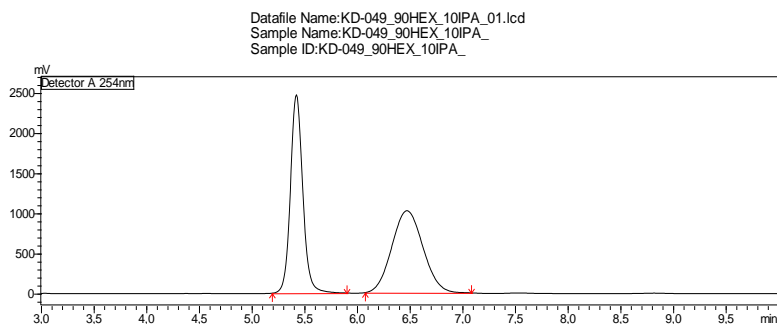

| Peaks | Retention time (min) | Area     | Area%   |
|-------|----------------------|----------|---------|
| 1     | 5,424                | 20217455 | 49,028  |
| 2     | 6,474                | 21018735 | 50,972  |
| total |                      | 41236189 | 100,000 |

### Enantioenriched (R)-37

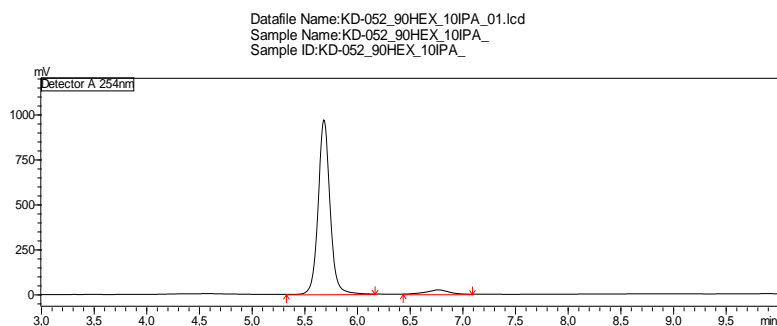

| Peaks | Retention time (min) | Area    | Area%   |
|-------|----------------------|---------|---------|
| 1     | 5,686                | 7572598 | 95,668  |
| 2     | 6,773                | 342926  | 4,332   |
| total |                      | 7915524 | 100,000 |

### (2S)-2-Methyl-2-propanyl 2-(3-phenyl-2-propynoyl)-1-pyrrolidinecarboxylate, ((S)-37)

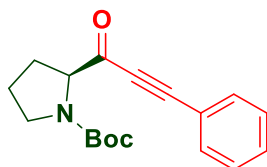

Synthesized according to **GP3** using **32** (0.078 g, 0.454 mmol, 1.5 equiv); (+)-sparteine (0.112 g, 0.485 mmol, 1.6 equiv); *s*-BuLi 1.3 M (0.37 ml, 0.485 mmol, 1.6 equiv) in CPME (3 mL); and *N*-methoxy-*N*-methyl-3-phenyl-2-propynamide (0.057 g, 0.303 mmol, 1.0 equiv) dissolved in CPME (1 mL); compound **(S)-37** was obtained in 81% yield (73 mg) as a yellow solid, mp 74-75 °C. Reaction run with (+)-sparteine recovered from preparation of **(S)-36**.



$[\alpha]_D = -118.65$  (c 0.5, CHCl<sub>3</sub>)

HPLC analysis: Chiralpak IA Column,  $\lambda$  250 nm, eluent: *n*-hexane / *i*-propanol 95/05. Flow: 1 mL/min

### Racemate

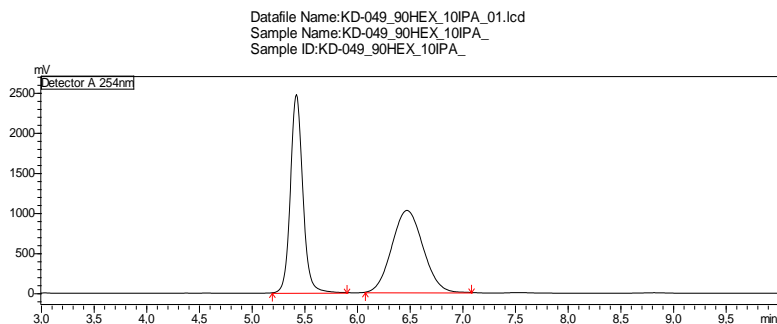

| Peaks | Retention time (min) | Area     | Area%   |
|-------|----------------------|----------|---------|
| 1     | 5,424                | 20217455 | 49,028  |
| 2     | 6,474                | 21018735 | 50,972  |
| total |                      | 41236189 | 100,000 |

### Enantioenriched (S)-37

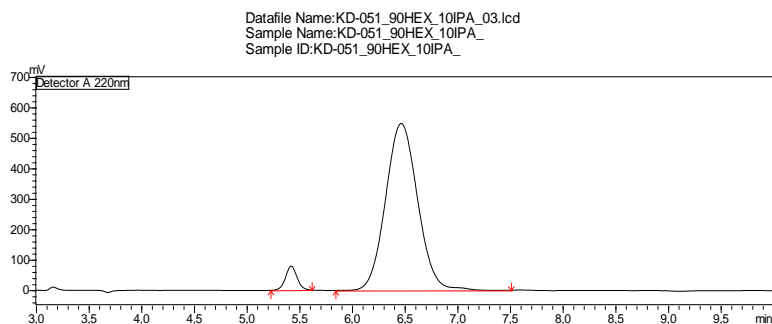

| Peaks | Retention time (min) | Area     | Area%   |
|-------|----------------------|----------|---------|
| 1     | 5,423                | 596986   | 4,899   |
| 2     | 6,467                | 342926   | 95,101  |
| total |                      | 12187016 | 100,000 |

(2*R*)-2-Methyl-2-propanyl 2-(phenylacetyl)pyrrolidine-1-carboxylate, ((*R*)-38)

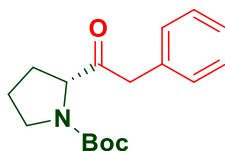

Synthesized according to **GP3** using **32** (0.078 g, 0.454 mmol, 1.5 equiv); (-)-sparteine (0.112 g, 0.485 mmol, 1.6 equiv); *s*-BuLi 1.3 M (0.37 ml, 0.485 mmol, 1.6 equiv) in CPME (3 mL); and *N*-methoxy-*N*-methyl-2-phenylacetamide (0.054 g, 0.303 mmol, 1.0 equiv) dissolved in CPME (1 mL); compound (**R**)-**38** was obtained in 79% yield (0.069 g) as a light brown solid, mp 54°C.

Rotamers ratio = 59:41

<sup>1</sup>H NMR (400 MHz, CDCl<sub>3</sub>): δ 7.32-7.21 (m, 5H, Ph), 4.44 (dd, *J* = 8.0, 3.6 Hz, 0.41H, Pyr H-2), 4.36-4.33 (m, 0.59H, Pyr H-2), 3.83 (s, 0.82H, CH<sub>2</sub>), 3.75 (s, 1.16H, CH<sub>2</sub>), 3.56-3.38 (m, 2H, Pyr), 2.14-2.07 (m, 0.59H, Pyr), 1.99-1.92 (m, 0.41H, Pyr), 1.81-1.74 (m, 3H, Pyr) 1.48 (s, 3.6H, (CH<sub>3</sub>)<sub>3</sub>), 1.39 (s, 5.4H, (CH<sub>3</sub>)<sub>3</sub>).

<sup>13</sup>C NMR (100 MHz, CDCl<sub>3</sub>): δ 207.7 (C=O), 207.2 (C=O), 153.9 (NC=O), 133.9 (Ph C-1), 133.5 (Ph C-1), 129.7 (Ph), 129.6 (Ph), 128.6 (Ph), 128.5 (Ph), 127.0 (Ph), 126.8 (Ph), 80.2 ((CH<sub>3</sub>)<sub>3</sub>C=O), 79.8 ((CH<sub>3</sub>)<sub>3</sub>C=O), 65.1 (Pyr C-2), 64.5 (Pyr C-2), 46.9 (Pyr), 46.8 (Pyr), 46.7 (PhCH<sub>2</sub>C=O), 45.8 (PhCH<sub>2</sub>C=O), 30.2 (Pyr), 29.2 (Pyr), 28.5 ((CH<sub>3</sub>)<sub>3</sub>), 28.3 ((CH<sub>3</sub>)<sub>3</sub>), 24.4 (Pyr), 23.6 (Pyr).

HRMS (ESI), *m/z*: calcd. for C<sub>17</sub>H<sub>23</sub>NNaO<sub>3</sub> 312.1570 [M+Na]<sup>+</sup>; found: 312.1577.

[α]<sub>D</sub> = +24.80 (c 0.5, CHCl<sub>3</sub>).

HPLC analysis: Chiralpak IC Column, λ 250 nm, eluent: *n*-hexane / *i*-propanol 85/15. Flow: 1 mL/min

### Racemate

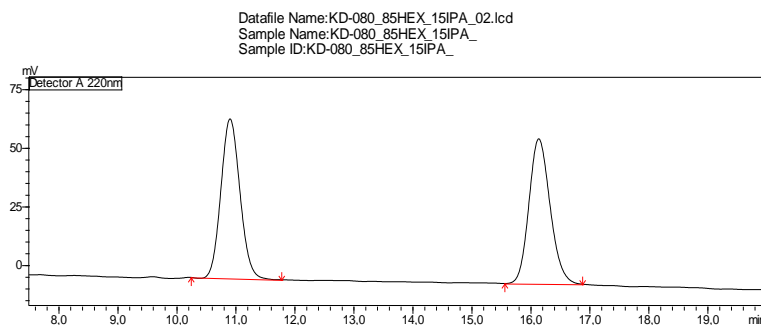

| Peaks | Retention time (min) | Area    | Area%   |
|-------|----------------------|---------|---------|
| 1     | 10,909               | 1521977 | 49,697  |
| 2     | 16,142               | 1540530 | 50,303  |
| total |                      | 3062507 | 100,000 |

### Enantioenriched (R)-38

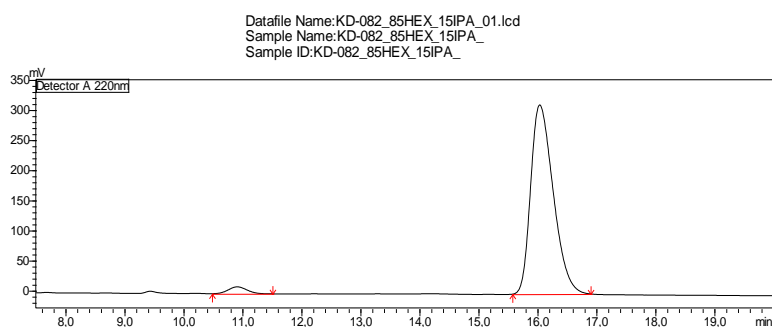

| Peaks | Retention time (min) | Area    | Area%   |
|-------|----------------------|---------|---------|
| 1     | 10,914               | 252948  | 2,939   |
| 2     | 16,040               | 8354130 | 97,061  |
| total |                      | 8607078 | 100,000 |

**(*R,R*)-2-Methyl-2-propanyl 2-(2-phenylpropanoyl)pyrrolidine-1-carboxylate, ((*R,R*)-39)**

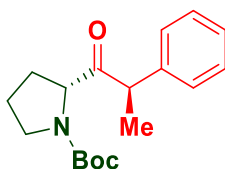

Synthesized according to **GP3** using **32** (0.078 g, 0.454 mmol, 1.5 equiv); (-)-sparteine (0.112 g, 0.485 mmol, 1.6 equiv); *s*-BuLi 1.3 M (0.37 ml, 0.485 mmol, 1.6 equiv) in CPME (3 mL); and (2*R*)-*N*-methoxy-*N*-methyl-2-phenylpropanamide (0.058 g, 0.303 mmol, 1.0 equiv) dissolved in CPME (1 mL); compound **(*R,R*)-39** was obtained in 85% yield (0.078 g) as a white solid, mp 95-97 °C

The racemic reference has been synthesized starting from *rac*-*N*-methoxy-*N*-methyl-2-phenylpropanamide, using TMEDA instead of (-)-sparteine and comprises a mixture of 4 stereoisomers.

*Rotamers ratio* = 65:35

<sup>1</sup>H NMR (400 MHz, CDCl<sub>3</sub>): δ 7.32-7.19 (m, 5H, Ph), 4.36 (dd, *J* = 8.8, 4.1 Hz, 0.39H, Pyr H-2), 4.32 (dd, *J* = 9.2, 4.5 Hz, 0.61H, Pyr H-2), 4.07 (q, *J* = 7.2 Hz, 0.39H, CH), 4.01 (q, *J* = 7.1 Hz, 0.61H, CH), 3.46-3.40 (m, 0.61H, Pyr), 3.32-3.19 (m, 1H, Pyr), 2.91-2.85 (m, 0.39H, Pyr), 2.14-2.05 (m, 0.61H, Pyr), 1.91-1.59 (m, 3H, Pyr) 1.50 (s, 3H, (CH<sub>3</sub>)<sub>3</sub>), 1.42-1.40 (m, 3H, CH<sub>3</sub>), 1.31 (s, 6H, (CH<sub>3</sub>)<sub>3</sub>).

<sup>13</sup>C NMR (100 MHz, CDCl<sub>3</sub>): δ 211.1 (C=O), 210.0 (C=O), 154.2 (NC=O), 140.2 (Ph C-1), 139.9 (Ph C-1), 128.9 (Ph), 128.6 (Ph), 128.1 (Ph), 128.1 (Ph), 127.2 (Ph), 126.9 (Ph), 80.0 ((CH<sub>3</sub>)<sub>3</sub>C=O), 79.7 ((CH<sub>3</sub>)<sub>3</sub>C=O), 65.3 (Pyr C-2), 65.1 (Pyr C-2), 49.0 (CH), 48.0 (CH), 46.7 (Pyr), 46.6 (Pyr), 29.7 (Pyr), 29.3 (Pyr C-3), 28.5 ((CH<sub>3</sub>)<sub>3</sub>), 28.2 ((CH<sub>3</sub>)<sub>3</sub>), 24.0 (Pyr), 23.1 (Pyr), 18.7 (CH<sub>3</sub>), 18.7 (CH<sub>3</sub>).

**HRMS** (ESI), *m/z*: calcd. for C<sub>18</sub>H<sub>25</sub>NNaO<sub>3</sub> 326.1727 [M+Na]<sup>+</sup>; found: 326.1732.

$[\alpha]_D = -72.45$  (c 0.5,  $\text{CHCl}_3$ ).

**HPLC analysis:** Chiralpak IC Column,  $\lambda$  220 nm, eluent: *n*-heptane / ethanol 98/02. Flow: 1 mL/min

### Mixture of stereoisomers

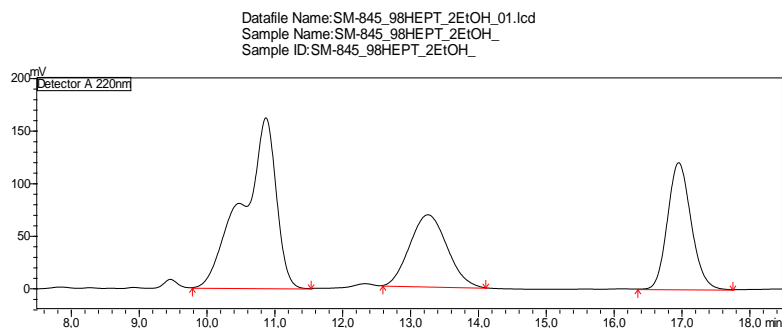

| Peaks | Retention time (min) | Area     | Area%   |
|-------|----------------------|----------|---------|
| 1 + 2 | 10,467 + 10,875      | 5644174  | 50,589  |
| 3     | 13,263               | 2605175  | 23,350  |
| 4     | 16,959               | 2907573  | 26,061  |
| total |                      | 11156922 | 100,000 |

### One stereoisomer (*R,R*)-39

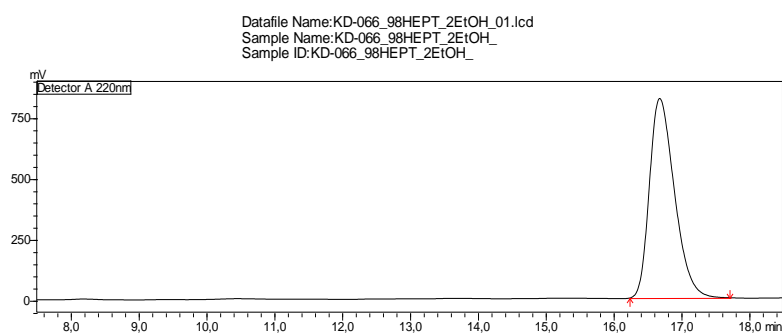

| Peaks | Retention time (min) | Area     | Area%   |
|-------|----------------------|----------|---------|
| 1     | 16,680               | 21001961 | 100     |
| total |                      | 21001961 | 100,000 |

**Synthetic manipulation of chiral  $\alpha$ -oxyketones:**

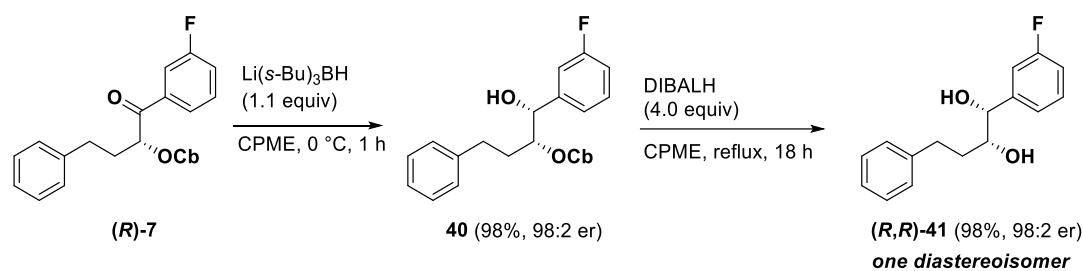

**(2R)-1-(3-Fluorophenyl)-1-hydroxy-4-phenyl-2-butanyl diisopropylcarbamate, ((R)-40)**

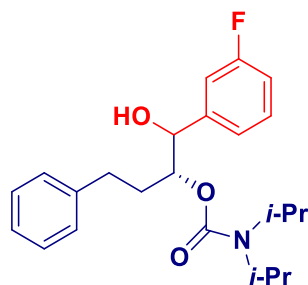

L-selectride 1M in THF (0.135 mL, 0.135 mmol, 2.0 equiv) was added dropwise to a stirred solution of **(R)-7** (0.026 g, 0.067 mmol, 1.0 equiv) in dry CPME (1 mL) at 0 °C for 1h. Then aqueous NaOH 10% was added and stirred 5 min before CPME was added and the phases were separated. Purification by column chromatography on silica gel (80:20 hexane/EtOAc). Compound **(R)-40** was obtained in 98% yield (0.025 g) as transparent oil.

Racemic reference was prepared from racemic ketone using NaBH<sub>4</sub> as reducing agent (4 stereoisomers).

<sup>1</sup>H NMR (400 MHz, CDCl<sub>3</sub>): δ 7.28 (m, 1H, Ph<sup>1</sup> H-5), 7.25 (m, 2H, Ph H-3,5), 7.17 (m, 1H, Ph H-4), 7.10 (m, 2H, Ph H-2), 7.08 (m, 3H, Ph H-2,6; Ph<sup>1</sup> H-2), 6.97 (m, 1H, Ph<sup>1</sup> H-4), 4.97 (m, 1H, CHOC=O), 4.73 (d, *J* = 6.7 Hz, 1H, CHOH), 3.93 (br s, 2H, CHCH<sub>3</sub>), 3.83 (br, 1H, CHOH), 2.71-2.59 (m, 2H, PhCH<sub>2</sub>), 1.92-1.74 (m, 2H, CH<sub>2</sub>CH), 1.27-1.20 (br s, 12H, CH<sub>3</sub>).

<sup>13</sup>C NMR (100 MHz, CDCl<sub>3</sub>): δ 162.8 (d, *J* = 246.0 Hz, Ph<sup>1</sup> C-3), 156.1 (NC=O), 143.8 (d, *J* = 6.8 Hz, Ph<sup>1</sup> C-1), 141.2 (Ph C-1), 129.8 (d, *J* = 8.1 Hz, Ph<sup>1</sup> C-5), 128.3 (Ph C-3,5), 128.2 (Ph C-2,6), 126.0 (Ph C-4), 122.5 (d, *J* = 2.9 Hz, Ph<sup>1</sup> C-6), 114.7 (d, *J* = 21.7 Hz, Ph<sup>1</sup> C-4), 113.9 (d, *J* = 21.9 Hz, Ph<sup>1</sup> C-2), 78.3 (CHOC=O), 46.4 (br CHCH<sub>3</sub>), 45.9 (br CHCH<sub>3</sub>), 32.6 (CH<sub>2</sub>CH), 31.9 (PhCH<sub>2</sub>), 21.4 (2×CH<sub>3</sub>), 20.5 (CH<sub>3</sub>), 20.4 (CH<sub>3</sub>).

<sup>19</sup>F NMR (376 MHz, CDCl<sub>3</sub>): δ -113.0 (m).

HRMS (ESI), *m/z*: calcd. for C<sub>23</sub>H<sub>31</sub>FNO<sub>3</sub> 388.2282[M+H]<sup>+</sup>; found 388.2281.

[α]<sub>D</sub>+34 (*c* 0.5, CHCl<sub>3</sub>).

**HPLC analysis:** Chiralpak IA Column,  $\lambda$  250 nm, eluent: *n*-hexane / *i*-propanol 80/20. Flow: 1 mL/min

**Stereoisomers mixture**

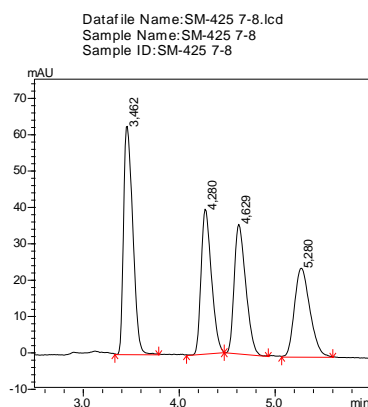

| Peaks | Retention time (min) | Area    | Area%   |
|-------|----------------------|---------|---------|
| 1     | 3,462                | 414231  | 32,698  |
| 2     | 4,280                | 292889  | 23,120  |
| 3     | 4,629                | 290898  | 22,963  |
| 4     | 5,280                | 268821  | 21,220  |
| total |                      | 1266838 | 100,000 |

**Diastereoisomer (R)-40**

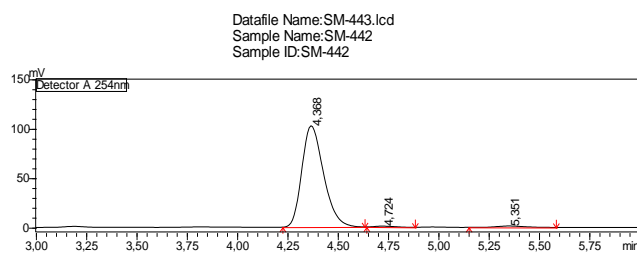

| Peaks | Retention time (min) | Area   | Area%   |
|-------|----------------------|--------|---------|
| 1     | 4,368                | 770182 | 97,597  |
| 2     | 4,724                | 6009   | 0,761   |
| 3     | 5,351                | 12958  | 1,642   |
| total |                      | 789149 | 100,000 |

**(1*R*,2*R*)-1-(3-Fluorophenyl)-4-phenyl-1,2-butanediol, ((*R*,*R*)-41)**

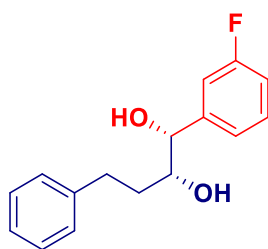

DIBAL-H (1M in THF, 0.66 mL, 0.66 mmol, 10 equiv) was added dropwise to a stirred solution of **(R)-40** (0.025 g, 0.066 mmol, 1.0 equiv) in dry CPME (2 mL) at room temperature. The reaction mixture refluxed for 18 h at 70 °C. Then aqueous NaOH 20% was added and stirred 5 min before CPME was added and the phases separated. Compound **(R,R)-41** was obtained by crystallization from CPME in 98% yield (0.016 g) as a white solid; mp 90-94 °C

Racemic reference was prepared from stereoisomeric mixture.

<sup>1</sup>H NMR (400 MHz, CDCl<sub>3</sub>): δ 7.07 (m, 1H, *m*-F Ph H-6), 7.04 (m, 1H, *m*-F Ph H-2), 7.30 (m, 1H, *m*-F Ph H-5), 7.26 (m, 2H, Ph H-3,5), 7.17 (m, 1H, Ph H-4), 7.12 (m, 2H, Ph H-2,6), 6.99 (m, 1H, *m*-F Ph H-4), 4.47 (d, *J* = 6.5 Hz, 1H, PhCH<sub>2</sub>OH), 3.68 (m, 1H, CH<sub>2</sub>CHOH), 2.84 (m, 1H, PhCH<sub>2</sub>), 2.62 (m, 1H, PhCH<sub>2</sub>), 2.44 (br s, 2H, CHOH), 1.79-1.61 (m, 1H, CH<sub>2</sub>CH).

<sup>13</sup>C NMR (100 MHz, CDCl<sub>3</sub>): δ 162.9 (d, *J* = 246.5 Hz, *m*-F Ph C-3), 143.7 (d, *J* = 6.8 Hz, *m*-F Ph C-1), 141.5 (Ph C-1), 130.0 (d, *J* = 8.2 Hz, *m*-F Ph C-5), 128.4 (Ph C-3,5), 128.3 (Ph C-2,6), 125.9 (Ph C-4), 122.4 (d, *J* = 2.9 Hz, *m*-F Ph C-6), 115.0 (d, *J* = 21.2 Hz, *m*-F Ph C-4), 113.7 (d, *J* = 21.9 Hz, *m*-F Ph C-2), 77.2 (d, *J* = 1.7 Hz, PhCH<sub>2</sub>OH), 75.1 (CH<sub>2</sub>CHOH), 34.3 (CH<sub>2</sub>CH), 31.9 (PhCH<sub>2</sub>).

<sup>19</sup>F NMR (376 MHz, CDCl<sub>3</sub>): δ -112.5 (m).

HRMS (ESI), *m/z*: calcd. for C<sub>16</sub>H<sub>17</sub>FNaO<sub>2</sub> 283.1105 [M+Na]<sup>+</sup>; found 283.1099.

[α]<sub>D</sub> +22 (c 0.5, CHCl<sub>3</sub>).

HPLC analysis: Chiralpak IG Column, λ 250 nm, eluent: *n*-hexane / *i*-propanol 90/10. Flow: 1 mL/min

#### Mixture 4 stereoisomers

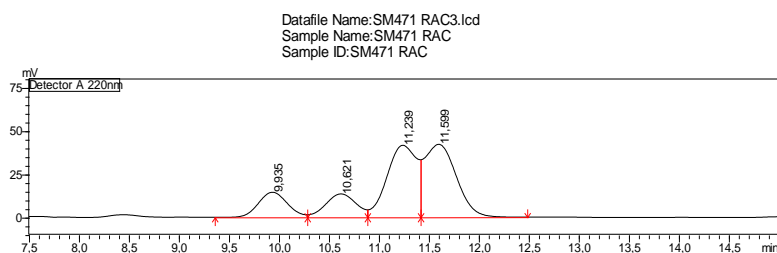

| Peaks | Retention time (min) | Area | Area% |
|-------|----------------------|------|-------|
|-------|----------------------|------|-------|

|       |        |         |         |
|-------|--------|---------|---------|
| 1     | 9,935  | 291194  | 12,305  |
| 2     | 10,621 | 284508  | 12,023  |
| 3     | 11,239 | 862553  | 36,450  |
| 4     | 11,599 | 928158  | 39,222  |
| total |        | 2366413 | 100,000 |

### Diastereoisomer (R,R)-41

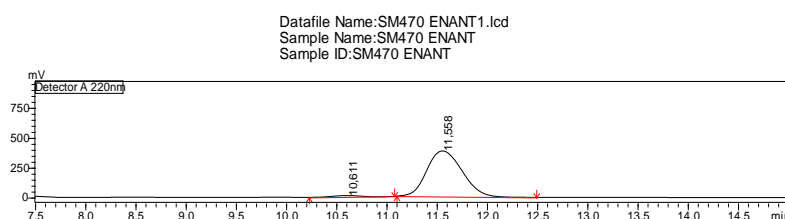

| Peaks | Retention time (min) | Area    | Area%   |
|-------|----------------------|---------|---------|
| 1     | 10,611               | 142042  | 1,510   |
| 2     | 11,558               | 9266134 | 98,490  |
| total |                      | 9408176 | 100,000 |

Proof of configuration at C1 center through transformation of 1,2-diol **41** into corresponding acetonide :

### (4R,5R)-4-(3-Fluorophenyl)-2,2-dimethyl-5-(2-phenethyl)-1,3-dioxolane:

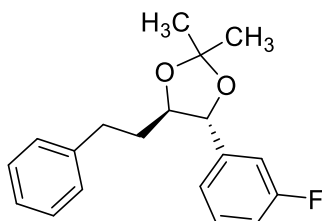

Compound **41** *syn* (0.007 g, 0.027 mmol, 1.0 equiv), 10-camphorsulfonic acid (0.006 g,  $27 \times 10^{-4}$  mmol, 10 mol%), MS3A (0.600 g), and 2,2-dimethoxypropane (10  $\mu$ L, 0.081 mmol, 3.0 equiv), were added to dichloromethane (1.0 mL) at RT under argon. The reaction mixture was stirred for 1 h, then saturated aqueous NaHCO<sub>3</sub> was added. MS3A was removed from the reaction mixture by filtration and the aqueous layer was extracted twice with dichloromethane. The combined organic layer was washed with brine, dried over Na<sub>2</sub>SO<sub>4</sub>, and evaporated. The residue was purified by silica-gel column chromatography (hexane/EtOAc = 95:5) to give acetonide in 80 % yield (0.006 g) as a transparent oil.



$^1\text{H NMR}$  (400 MHz,  $\text{CDCl}_3$ )  $\delta$ : 7.31 (m, 1H, *m*-F Ph H-5), 7.26 (m, 2H, Ph H-3,5), 7.18 (m, 1H, Ph H-4), 7.14 (m, 2H, Ph H-2,6), 7.11 (m, 1H, *m*-F Ph H-6), 7.09 (m, 1H, *m*-F Ph H-2), 7.0 (m, 1H, *m*-F Ph H-4), 4.56 (d,  $J = 8.5$  Hz, 1H, *m*-F Ph  $\text{CH}$ ), 3.77 (m, 1H,  $\text{CHCH}_2$ ), 2.83 (m, 1H,  $\text{PhCH}_2$ ), 2.63 (m, 1H,  $\text{PhCH}_2$ ), 1.91 (m, 2H,  $\text{CH}_2\text{CH}$ ), 1.57 (s, 3H,  $\text{CH}_3$ ), 1.54 (s, 3H,  $\text{CH}_3$ ).

$^{13}\text{C NMR}$  (100 MHz,  $\text{CDCl}_3$ )  $\delta$ : 163.0 ( $^1J = 246.3$  Hz, *m*-F Ph C-3), 141.5 (Ph C-1), 140.7 ( $^3J = 7.1$  Hz, *m*-F Ph C-1), 130.1 ( $^3J = 8.2$  Hz, *m*-F Ph C-5), 128.4 (Ph C-3,5), 128.3 (Ph C-2,6), 125.9 (Ph C-4), 122.3 ( $^4J = 2.9$  Hz, *m*-F Ph C-6), 115.2 ( $^2J = 21.2$  Hz, *m*-F Ph C-4), 113.5 ( $^2J = 22.2$  Hz, *m*-F Ph C-2), 109.0 ( $\text{C}(\text{CH}_3)_2$ ), 82.6 (*m*-F Ph  $\text{CH}$ ), 82.5 ( $\text{CHCH}_2$ ), 33.3 ( $\text{CHCH}_2$ ), 32.2 ( $\text{CH}_2\text{Ph}$ ), 27.4 ( $\text{CH}_3$ ), 26.9 ( $\text{CH}_3$ ).

$^{19}\text{F NMR}$  (376 MHz,  $\text{CDCl}_3$ )  $\delta$ : -112.7 (m)

HRMS (ESI),  $m/z$ : calcd. For  $\text{C}_{19}\text{H}_{21}\text{FNaO}_2$  323.1418  $[\text{M}+\text{Na}]^+$ ; found 323.1416

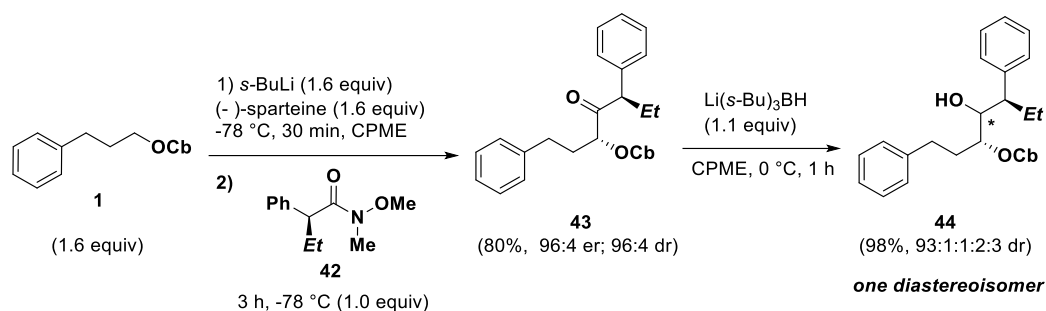

### (2*R*)-4-Oxo-1,5-diphenyl-3-heptanyl diisopropylcarbamate, (*rac*-43)

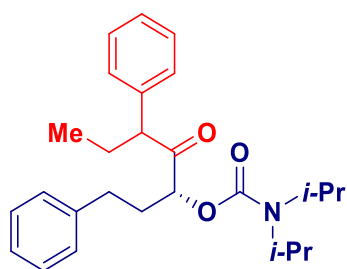

Synthesized according to **GP1** using **1** (0.077g, 0.294 mmol, 1.5 equiv); (-)-sparteine (0.073 g, 0.313 mmol, 1.6 equiv); *s*-BuLi 1.4 M (0.022 mL, 0.313 mmol, 1.6 equiv) in CPME (2 mL); and *N*-methoxy-*N*-methyl-2-phenylbutanamide (0.047 g, 0.196 mmol, 1.0 equiv) dissolved in CPME (1 mL); compound ***rac*-43** was obtained in 75% yield (0.060 g) as a white solid; mp 132-135 °C.

Major diastereoisomer:

$^1\text{H NMR}$  (400 MHz,  $\text{CDCl}_3$ ):  $\delta$  7.30 (m, 2H,  $\text{Ph}^1$  H-3,5), 7.25 (m, 3H,  $\text{Ph}^1$  H-4), 7.24 (m, 3H,  $\text{Ph}^1$  H-2,6), 7.21 (m, 2H, Ph H-3,5), 7.15 (m, 1H, Ph H-4), 6.89 (m, 2H, Ph H-2,6), 5.09 (dd,  $J = 7.7$  Hz, 4.0 Hz, 1H,  $\text{CHC}=\text{O}$ ), 4.04 (br s, 1H,  $\text{CHCH}_3$ ), 3.84 (br s, 1H,  $\text{CHCH}_3$ ), 3.76 (dd,  $J = 8.2$  Hz, 6.7 Hz, 1H,  $\text{CHPh}$ ), 2.53 (m,

1H, PhCH<sub>2</sub>), 2.40 (m, 1H, PhCH<sub>2</sub>), 1.77 (m, 2H, CH<sub>2</sub>CH), 2.10 (m, 1H, CH<sub>2</sub>CH<sub>3</sub>), 1.74 (m, 1H, CH<sub>2</sub>CH<sub>3</sub>), 1.37-1.17 (br, 12H, CH<sub>3</sub>), 0.82 (t, *J* = 7.4 Hz, 3H, CH<sub>2</sub>CH<sub>3</sub>).

<sup>13</sup>C NMR (100 MHz, CDCl<sub>3</sub>): δ 207.6 (C=O), 154.7 (NC=O), 140.9 (Ph C-1), 138.0 (Ph<sup>1</sup> C-1), 128.8 (Ph<sup>1</sup> C-3,5), 128.6 (Ph<sup>1</sup> C-2,6), 128.25 (Ph C-2,6), 128.4 (Ph C-3,5), 127.3 (Ph<sup>1</sup> C-4), 126.0 (Ph C-4), 77.6 (CHC=O), 57.4 (CHPh), 46.7 (br CHCH<sub>3</sub>), 45.6 (br CHCH<sub>3</sub>), 32.3 (CH<sub>2</sub>CH), 31.5 (PhCH<sub>2</sub>), 26.4 (CH<sub>2</sub>CH<sub>3</sub>), 21.7 (br CH<sub>3</sub>), 21.5 (br CH<sub>3</sub>), 20.5 (br 2×CH<sub>3</sub>), 11.9 (CH<sub>2</sub>CH<sub>3</sub>).

Minor diastereoisomer:

<sup>1</sup>H NMR (400 MHz, CDCl<sub>3</sub>): δ 7.30 (m, 2H, Ph<sup>1</sup> H-3,5), 7.28 (m, 3H, Ph<sup>1</sup> H-4), 7.24 (m, 3H, Ph<sup>1</sup> H-2,6), 7.21 (m, 2H, Ph H-3,5), 7.15 (m, 1H, Ph H-4), 7.01 (m, 2H, Ph H-2,6), 4.99 (dd, *J* = 8.3 Hz, 5.0 Hz, 1H, CHC=O), 4.04 (br s, 1H, CHCH<sub>3</sub>), 3.84 (br s, 1H, CHCH<sub>3</sub>), 2.53-2.40 (m, 2H, PhCH<sub>2</sub>), 3.69 (dd, *J* = 8.3 Hz, 6.5 Hz, 1H, CHPh), 2.10-1.74 (m, 2H, CH<sub>2</sub>CH<sub>3</sub>), 1.77 (m, 2H, CH<sub>2</sub>CH), 1.37-1.17 (br, 12H, CH<sub>3</sub>), 0.78 (t, *J* = 7.4 Hz, 3H, CH<sub>2</sub>CH<sub>3</sub>).

<sup>13</sup>C NMR (100 MHz, CDCl<sub>3</sub>): δ 208.3 (C=O), 154.4 (NC=O), 140.9 (Ph C-1), 138.3 (Ph<sup>1</sup> C-1), 128.7 (Ph<sup>1</sup> C-3,5), 128.6 (Ph<sup>1</sup> C-2,6), 128.41 (Ph C-3,5), 128.27 (Ph C-2,6), 127.2 (Ph<sup>1</sup> C-4), 126.1 (Ph C-4), 78.6 (CHC=O), 55.5 (CHPh), 46.7 (br CHCH<sub>3</sub>), 45.6 (br CHCH<sub>3</sub>), 31.5 (PhCH<sub>2</sub>), 32.3 (CH<sub>2</sub>CH), 26.1 (CH<sub>2</sub>CH<sub>3</sub>), 21.7 (br CH<sub>3</sub>), 21.5 (br CH<sub>3</sub>), 20.5 (br 2 CH<sub>3</sub>), 12.0 (CH<sub>2</sub>CH<sub>3</sub>).

HRMS (ESI), *m/z*: calcd. for C<sub>26</sub>H<sub>35</sub>NNaO<sub>3</sub> 432.2509[M+Na]<sup>+</sup>; found 432.2513.

### (3*R*, 5*S*)-4-Oxo-1,5-diphenyl-3-heptanyl diisopropylcarbamate, (43)

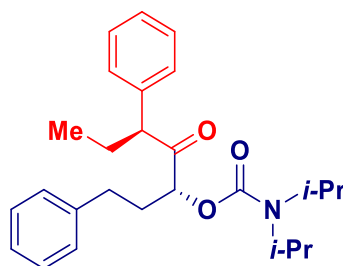

Synthesized according to **GP1** using **1** (0.077g, 0.294 mmol, 1.5 equiv); (-)-sparteine (0.073 g, 0.313 mmol, 1.6 equiv); *s*-BuLi 1.4 M (0.022 mL, 0.313 mmol, 1.6 equiv) in CPME (2 mL); and (*S*)-*N*-methoxy-*N*-methyl-2-phenylbutanamide (0.047 g, 0.196 mmol, 1.0 equiv) dissolved in CPME (1 mL); compound **43** was obtained in 80% NMR yield (calculated on the crude). The compound could not be purified and was directly used in the synthesis of **44** as mixture with Hoppe carbamate.

<sup>1</sup>H NMR (400 MHz, CDCl<sub>3</sub>): δ 7.30 (m, 2H, Ph<sup>1</sup> H-3,5), 7.25 (m, 3H, Ph<sup>1</sup> H-4), 7.24 (m, 3H, Ph<sup>1</sup> H-2,6), 7.21 (m, 2H, Ph H-3,5), 7.15 (m, 1H, Ph H-4), 6.89 (m, 2H, Ph H-2,6), 5.09 (dd, *J* = 7.7 Hz, 4.0 Hz, 1H,

$\underline{\text{CHC=O}}$ ), 4.04 (br s, 1H,  $\underline{\text{CHCH}_3}$ ), 3.84 (br s, 1H,  $\underline{\text{CHCH}_3}$ ), 3.76 (dd,  $J = 8.2$  Hz, 6.7 Hz, 1H,  $\text{CHPh}$ ), 2.53 (m, 1H,  $\text{PhCH}_2$ ), 2.40 (m, 1H,  $\text{PhCH}_2$ ), 1.77 (m, 2H,  $\underline{\text{CH}_2\text{CH}}$ ), 2.10 (m, 1H,  $\underline{\text{CH}_2\text{CH}_3}$ ), 1.74 (m, 1H,  $\underline{\text{CH}_2\text{CH}_3}$ ), 1.37-1.17 (br, 12H,  $\underline{\text{CH}_3}$ ), 0.82 (t,  $J = 7.4$  Hz, 3H,  $\underline{\text{CH}_2\text{CH}_3}$ ).

$^{13}\text{C}$  NMR (100 MHz,  $\text{CDCl}_3$ ):  $\delta$  207.6 ( $\text{C=O}$ ), 154.7 ( $\text{NC=O}$ ), 140.9 (Ph C-1), 138.0 ( $\text{Ph}^1$  C-1), 128.8 ( $\text{Ph}^1$  C-3,5), 128.6 ( $\text{Ph}^1$  C-2,6), 128.25 (Ph C-2,6), 128.4 (Ph C-3,5), 127.3 ( $\text{Ph}^1$  C-4), 126.0 (Ph C-4), 77.6 ( $\underline{\text{CHC=O}}$ ), 57.4 ( $\text{CHPh}$ ), 46.7 (br  $\underline{\text{CHCH}_3}$ ), 45.6 (br  $\underline{\text{CHCH}_3}$ ), 32.3 ( $\underline{\text{CH}_2\text{CH}}$ ), 31.5 ( $\text{PhCH}_2$ ), 26.4 ( $\underline{\text{CH}_2\text{CH}_3}$ ), 21.7 (br  $\underline{\text{CH}_3}$ ), 21.5 (br  $\underline{\text{CH}_3}$ ), 20.5 (br 2  $\underline{\text{CH}_3}$ ), 11.9 ( $\text{CH}_2\underline{\text{CH}_3}$ ).

HRMS (ESI),  $m/z$ : calcd. for  $\text{C}_{26}\text{H}_{35}\text{NNaO}_3$  432.2509 $[\text{M}+\text{Na}]^+$ ; found 432.2513.

HPLC analysis: Chiralpak IG Column,  $\lambda$ 220 nm, eluent: *n*-hexane / *i*-propanol 90/10. Flow: 1 mL/min

### Stereoisomers mixture rac-43

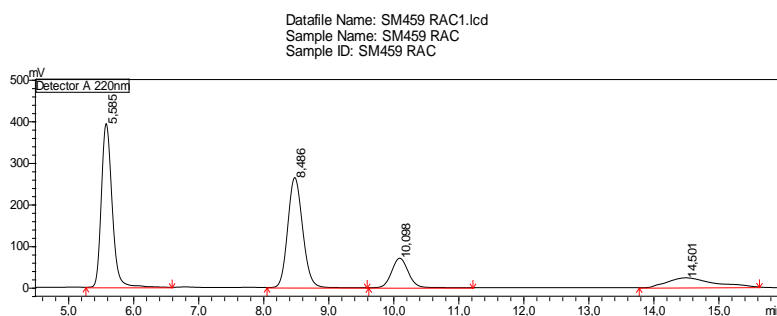

| Peaks | Retention time (min) | Area     | Area%  |
|-------|----------------------|----------|--------|
| 1     | 5,585                | 4506660  | 40,792 |
| 2     | 8,486                | 4181966  | 37,853 |
| 3     | 10,098               | 1248517  | 11,301 |
| 4     | 14,501               | 1110834  | 10,055 |
| total |                      | 11047976 | 100    |

### Diastereoisomer 43

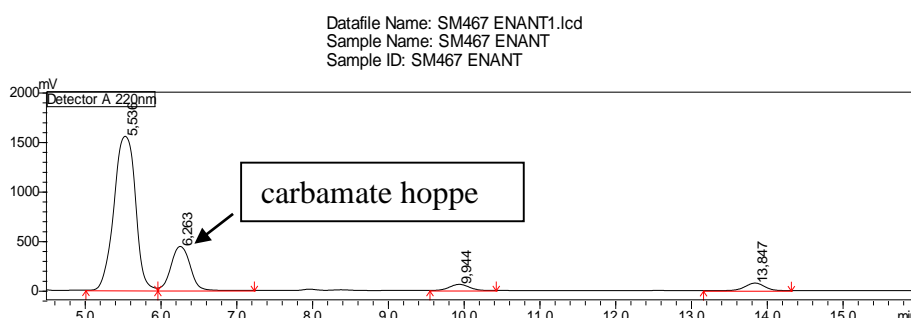

| Peaks | Retention time (min) | Area     | Area%   |
|-------|----------------------|----------|---------|
| 1     | 5,536                | 30548094 | 75,164  |
| 2     | 6,263                | 7706102  | 18,961  |
| 3     | 9,944                | 1082946  | 2,665   |
| 4     | 13,847               | 1304667  | 3,210   |
| total |                      | 40641809 | 100,000 |

The ketone was reduced to alcohol although the co-presence of carbamate precursor.

### Carbamate Hoppe

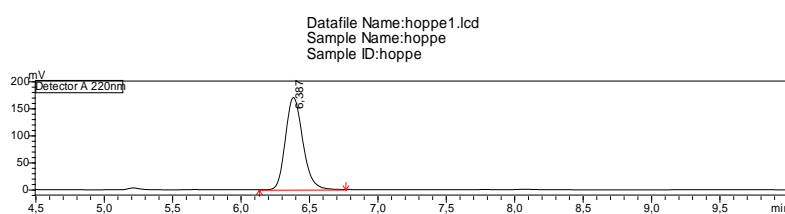

| Peaks | Retention time (min) | Area    | Area%   |
|-------|----------------------|---------|---------|
| 1     | 6,387                | 1504959 | 100,000 |
| total |                      | 1504959 | 100,000 |

### Diastereoisomer 43

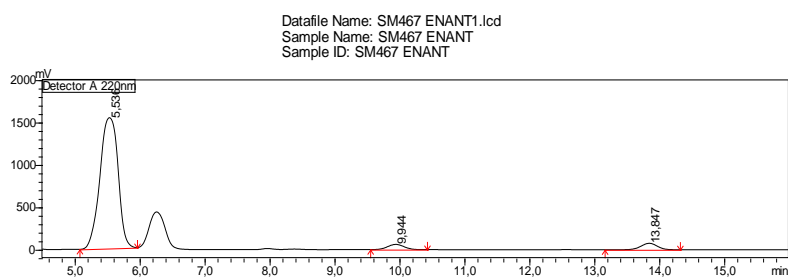

| Peaks | Retention time (min) | Area     | Area%   |
|-------|----------------------|----------|---------|
| 1     | 5,536                | 29939624 | 92,614  |
| 2     | 9,944                | 1082946  | 3,350   |
| 3     | 13,847               | 1304667  | 4,036   |
| total |                      | 32327237 | 100,000 |

**(3R, 5S)-4-Hydroxy-1,5-diphenyl-3-heptanyl diisopropylcarbamate (44)**

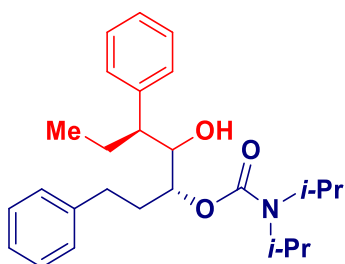

L-selectride (1M in THF, 0.158 mL, 0.158 mmol, 2.0 equiv) was added dropwise to a stirred solution of **43** (0.032 g, 0.079 mmol, 1.0 equiv) in dry CPME (3 mL) at 0 °C for 1h. Then aqueous NaOH 10% was added and stirred 5 min before CPME was added and the phases were separated. Purification by column chromatography on alumina II grade (95:05 hexane/EtOAc). Compound **44** was obtained in 98% yield (0.031 g) as a transparent oil.

Racemic reference was prepared from stereoisomers mixture **rac-43** using NaBH<sub>4</sub> as reducing agent (four stereoisomers).

<sup>1</sup>H NMR (400 MHz, CDCl<sub>3</sub>): δ 7.31 (m, 2H, Ph<sup>1</sup> H-3,5), 7.28 (m, 2H, Ph H-3,5), 7.23 (m, 3H, Ph<sup>1</sup> H-2,4,6), 7.19 (m, 1H, Ph H-4), 7.18 (m, 2H, Ph H-2,6), 4.98 (m, 1H, CHOC=O), 4.02 (br s, 1H, CHCH<sub>3</sub>), 3.96 (m, 1H, CHOH), 3.80 (br s, 1H, CHCH<sub>3</sub>), 2.77 (m, 1H, PhCH<sub>2</sub>), 2.63 (m, 1H, PhCH<sub>2</sub>), 2.58 (m, 1H, CHPh), 2.08 (m, 1H, CH<sub>2</sub>CH), 1.86 (m, 1H, CH<sub>2</sub>CH), 1.72 (m, 2H, CH<sub>2</sub>CH<sub>3</sub>), 1.25 (br s, 6H, CH<sub>3</sub>), 1.24 (br s, 6H, CH<sub>3</sub>), 0.71 (t, J = 7.4 Hz, 3H, CH<sub>2</sub>CH<sub>3</sub>).

<sup>13</sup>C NMR (100 MHz, CDCl<sub>3</sub>): δ 155.2 (NC=O), 141.9 (Ph C-1), 141.0 (Ph<sup>1</sup> C-1), 129.0 (Ph<sup>1</sup> C-2,6), 128.43 (Ph<sup>1</sup> C-3,5), 128.37 (Ph C-3,5), 128.35 (Ph C-2,6), 126.7 (Ph<sup>1</sup> C-4), 125.9 (Ph C-4), 76.1 (CHOH), 75.8 (CHOC=O), 50.4 (CHPh<sup>1</sup>), 46.3 (br CHCH<sub>3</sub>), 45.5 (br CHCH<sub>3</sub>), 32.2 (PhCH<sub>2</sub>), 31.0 (CH<sub>2</sub>CH), 25.2 (CH<sub>2</sub>CH<sub>3</sub>), 21.6 (br, 2CH<sub>3</sub>), 20.6 (br, 2xCH<sub>3</sub>), 12.1 (CH<sub>2</sub>CH<sub>3</sub>).

HRMS (ESI), m/z: calcd. for C<sub>26</sub>H<sub>38</sub>NO<sub>3</sub> 412.2846 [M+H]<sup>+</sup>; found 412.2855.

[α]<sub>D</sub>+27 (c 0.5, CHCl<sub>3</sub>).

HPLC analysis: Chiralpak IC Column, λ 220 nm, eluent: n-hexane / i-propanol 95/5. Flow: 1 mL/min

diastereoisomers mixture **rac-44**

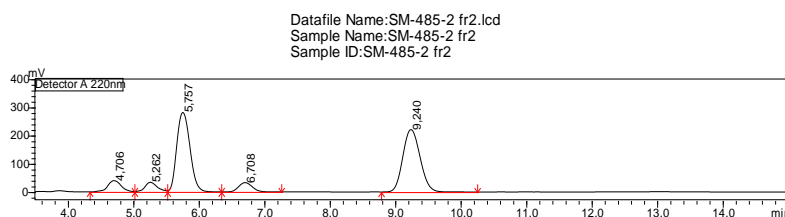

| Peaks | Retention time (min) | Area    | Area%   |
|-------|----------------------|---------|---------|
| 1     | 4,706                | 572997  | 6,031   |
| 2     | 5,262                | 449569  | 4,732   |
| 3     | 5,757                | 3973453 | 41,825  |
| 4     | 6,708                | 479884  | 5,051   |
| 5     | 9,240                | 4024297 | 42,360  |
| total |                      | 9500202 | 100,000 |

### Diastereoisomer 44

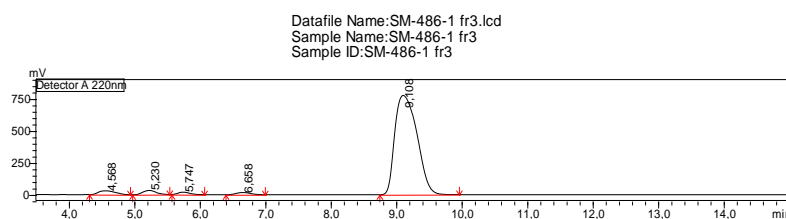

| Peaks | Retention time (min) | Area     | Area%   |
|-------|----------------------|----------|---------|
| 1     | 4,568                | 524039   | 2,656   |
| 2     | 5,230                | 456115   | 2,312   |
| 3     | 5,747                | 232549   | 1,179   |
| 4     | 6,658                | 255756   | 1,296   |
| 5     | 9,108                | 18261636 | 92,557  |
| total |                      | 19730096 | 100,000 |

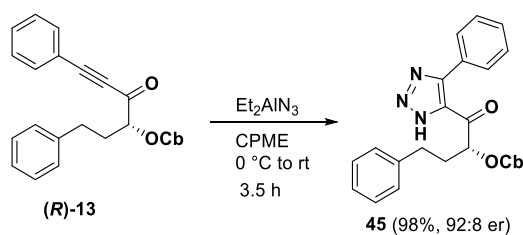

### (R)-1-Oxo-4-phenyl-1-(4-phenyl-1H-1,2,3-triazol-5-yl)-2-butanyl diisopropylcarbamate, ((R)-45)

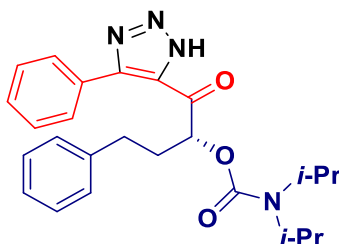

An oven-dried flask was charged with sodium azide (0.027 g, 0.041 mmol, 4.0 equiv) and diethylaluminum chloride 0.9 M (0.45 mL, 0.041 mmol, 4.0 equiv) in CPME (1.0 mL) at 0 °C under argon and stirred for 15 min. The white heterogeneous mixture was then warmed to room temperature and stirred for 6 hours. During the formation of the reagent, a suspension of sodium chloride was formed. A solution of **(R)**-13 (0.040 g, 0.102 mmol, 1.0 equiv) in CPME (0.5 mL) was added at 0 °C. The mixture was gradually heated to room temperature and stirred for 3.5 hours. The reaction mixture was cooled to 0 °C and it was quenched with water. The two resulting phases were separated, and the organic phase was dried over anhydrous NaSO<sub>4</sub> and filtered. Compound **(R)**-45 was obtained by crystallization from CPME in 98% yield (0.043 g) as a white solid; mp 133-135 °C

<sup>1</sup>H NMR (400 MHz, CDCl<sub>3</sub>): δ 13.92 (br s, 1H, triazole NH), 7.76 (m, 2H, Ph<sup>1</sup> H-2,6), 7.34 (m, 3H, Ph<sup>1</sup> H-3,4,5), 7.25 (m, 2H, Ph H-3,5), 7.17 (m, 2H, Ph H-2,6), 7.16 (m, 1H, Ph H-4), 6.21 (dd, *J* = 8.9 Hz, 3.9 Hz, 1H, CHC=O), 4.10 (m, 1H, CHCH<sub>3</sub>), 3.92 (m, 1H, CHCH<sub>3</sub>), 2.84 (m, 2H, PhCH<sub>2</sub>), 2.31-2.21 (m, 2H, CH<sub>2</sub>CH), 1.27 (br m, 6H, CH<sub>3</sub>), 1.40 (br m, 3H, CH<sub>3</sub>), 1.37 (br m, 3H, CH<sub>3</sub>).

<sup>13</sup>C NMR (100 MHz, CDCl<sub>3</sub>): δ 191.4 (triazole-C=O), 155.5 (NC=O), 141.1 (Ph C-1), 139.2 (Ph<sup>1</sup> C-1), 129.4 (Ph<sup>1</sup> C-4), 128.9 (Ph<sup>1</sup> C-2,6), 128.4 (Ph C-3,5), 128.3 (Ph C-2,6), 128.2 (Ph<sup>1</sup> C-3,5), 126.0 (Ph C-4), 76.9 (CHC=O), 46.9 (CHCH<sub>3</sub>), 46.1 (CHCH<sub>3</sub>), 33.0 (CH<sub>2</sub>CH), 32.0 (PhCH<sub>2</sub>), 21.7, 21.3, 20.5 (4×CH<sub>3</sub>).

HRMS (ESI), *m/z*: calcd. for C<sub>25</sub>H<sub>30</sub>N<sub>4</sub>NaO<sub>3</sub> 457.2210 [M+Na]<sup>+</sup>; found 457.2215.

[α]<sub>D</sub>-39 (c 0.5, CHCl<sub>3</sub>).

HPLC analysis: Chiralpak IC Column, λ 250 nm, eluent: *n*-hexane / *i*-propanol 95/5. Flow: 1 mL/min

### Racemate

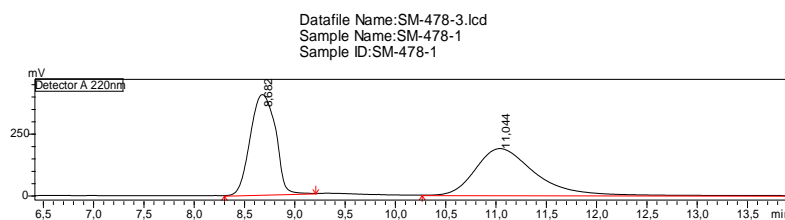

| Peaks | Retention time (min) | Area   | Area%   |
|-------|----------------------|--------|---------|
| 1     | 8,682                | 404103 | 47,896  |
| 2     | 11,044               | 188490 | 52,104  |
| total |                      | 592593 | 100,000 |

## Enantioenriched (*R*)-45

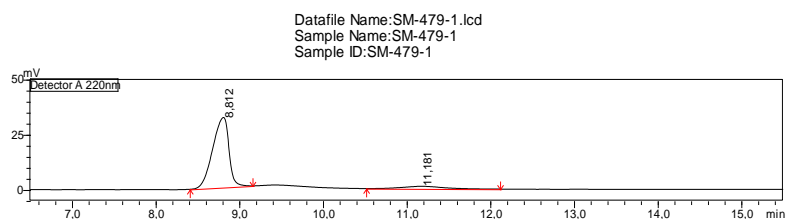

| Peaks | Retention time (min) | Area  | Area%   |
|-------|----------------------|-------|---------|
| 1     | 8,812                | 31708 | 91,810  |
| 2     | 11,181               | 8,190 | 8,190   |
| total |                      | 32851 | 100,000 |

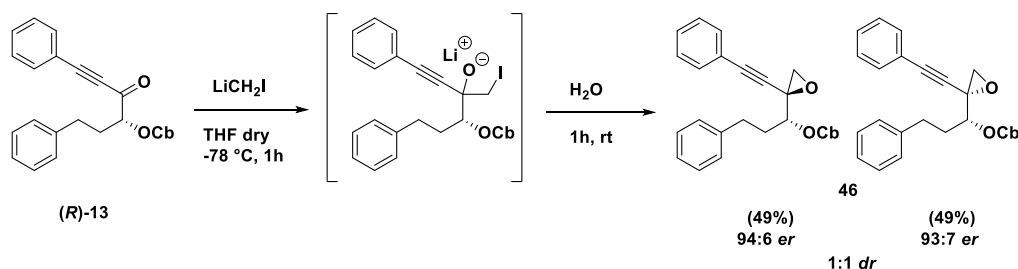

### (2*R*)-4,5-Anhydro-1,2-dideoxy-3-*O*-(diisopropylcarbamoyl)-1-phenyl-4-(phenylethynyl)pentitol, (**46**)

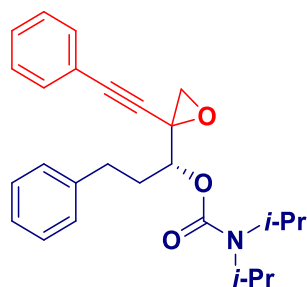

A solution of (**R**)-**13** (0.030 mg, 0.076 mmol, 1.0 equiv) in THF (0.38 mL) was cooled at  $-78\text{ }^{\circ}\text{C}$ . Diiodomethane (0.062 g, 0.23 mmol, 3.0 equiv) was first added, followed by MeLi–LiBr complex 1.5 M solution in diethyl ether (0.14 mL, 0.21 mmol, 2.8 equiv). The resulting solution was stirred at that temperature for 1 h and at r.t. overnight. Water was added and the mixture was washed with Et<sub>2</sub>O and brine. The two resulting phases were separated, and the organic phase was dried over anhydrous NaSO<sub>4</sub>, filtered, and removed in vacuo to give the desired product as a mixture of two stereoisomers. Purification by column chromatography on alumina II grade a (95:5 hexane/EtOAc) allowed the separation of them. Compound **46a** and **46b** were obtained in 49% yield (0.015 g) as a transparent oils.

#### 46a



**<sup>1</sup>H NMR** (400 MHz, CD<sub>2</sub>Cl<sub>2</sub>): δ 7.47-7.15 (m, 8H, Ph H, Ph<sup>1</sup> H-3,4,5), 7.45 (m, 2H, Ph<sup>1</sup> H-2,6), 4.85 (m, 1H, CHOC=O), 4.15 (br, 1H, CHCH<sub>3</sub>), 3.73 (br, 1H, CHCH<sub>3</sub>), 3.12 (d, *J* = 5.4 Hz, CH-epoxide), 2.93 (d, *J* = 5.4 Hz, CH-epoxide), 2.82-2.68 (m, 2H, PhCH<sub>2</sub>), 2.24-2.17 (m, 2H, CH<sub>2</sub>CH), 1.40-1.13 (br, 12H, CH<sub>3</sub>).

**<sup>13</sup>C NMR** (100 MHz, CD<sub>2</sub>Cl<sub>2</sub>): δ 155.2 (NC=O), 142.0 (Ph C-1), 132.3 (Ph<sup>1</sup> C-2,6), 129.3 (Ar), 128.8 (Ph C(2x)), 128.7 (Ar), 126.4 (Ph C-4), 122.3 (Ph<sup>1</sup> C-1), 85.7 (C≡CPh), 84.7 (C≡CPh), 75.3 (CHOC=O), 53.3 (CH<sub>2</sub>-epoxide), 53.3 (C-epoxide), 47.3 (br, CHCH<sub>3</sub>), 45.7 (br, CHCH<sub>3</sub>), 34.2 (CH<sub>2</sub>CH), 32.1 (PhCH<sub>2</sub>), 21.8 (br, CH<sub>3</sub>), 20.6 (br, CH<sub>3</sub>).

**HRMS** (ESI), *m/z*: calcd. for C<sub>26</sub>H<sub>32</sub>NO<sub>3</sub> 406.2377 [M+H]<sup>+</sup>; found 406.2376.

[α]<sub>D</sub>+5 (c 0.5, CHCl<sub>3</sub>).

**HPLC analysis:** Chiralpak IA Column, λ 250 nm, eluent: *n*-hexane / *i*-propanol 95/5. Flow: 1 mL/min

**two stereoisomers**

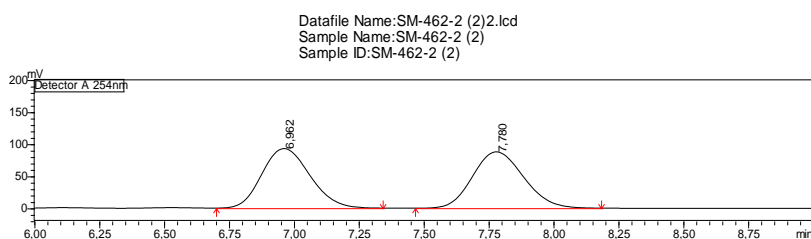

| Peaks | Retention time (min) | Area    | Area%   |
|-------|----------------------|---------|---------|
| 1     | 6,962                | 1192874 | 49,849  |
| 2     | 7,780                | 1200081 | 50,151  |
| total |                      | 2392955 | 100,000 |

**Stereoisomer 46a**

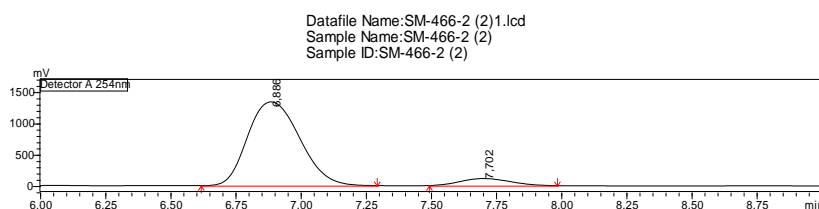

| Peak  | Retention time (min) | Area     | Area%   |
|-------|----------------------|----------|---------|
| 1     | 6,886                | 18567220 | 92,582  |
| 2     | 7,702                | 1487636  | 7,418   |
| total |                      | 20054856 | 100,000 |

**46b**

<sup>1</sup>H NMR (400 MHz, CD<sub>2</sub>Cl<sub>2</sub>): δ 7.45-7.16 (m, 8H, Ph H, Ph<sup>1</sup> H-3,4,5), 7.44 (m, 2H, Ph<sup>1</sup> H-2,6), 4.59 (m, 1H, CHOC=O), 4.10 (br, 1H, CHCH<sub>3</sub>), 3.76 (br, 1H, CHCH<sub>3</sub>), 3.12 (A-part of an AB-system, <sup>2</sup>J<sub>AB</sub> = 5.8 Hz, CH-epoxide), 3.09 (B-part of an AB-system, <sup>2</sup>J<sub>AB</sub> = 5.4 Hz, CH-epoxide), 2.85-2.71 (m, 2H, PhCH<sub>2</sub>), 2.26-2.20 (m, 2H, CH<sub>2</sub>CH), 1.38-1.13 (br, 12H, CH<sub>3</sub>).

<sup>13</sup>C NMR (100 MHz, CD<sub>2</sub>Cl<sub>2</sub>): δ 155.0 (NC=O), 142.1 (Ph C-1), 132.2 (Ph<sup>1</sup> C-2,6), 129.2 (Ph<sup>1</sup> C-4), 128.81 (Ar), 128.76 (Ar), 128.75 (Ar), 126.3 (Ph C-4), 122.4 (Ph<sup>1</sup> C-1), 85.8 (C≡CPh), 84.7 (C≡CPh), 75.1 (CHOC=O), 54.8 (CH<sub>2</sub>-epoxide), 52.2 (C-epoxide) 33.9 (CH<sub>2</sub>CH), 32.0 (PhCH<sub>2</sub>), 21.8 (br CH<sub>3</sub>), 20.7 (br, CH<sub>3</sub>), CHCH<sub>3</sub> not unambiguously identified.

HRMS (ESI), *m/z*: calcd. for C<sub>26</sub>H<sub>32</sub>NO<sub>3</sub> 406.2377 [M+H]<sup>+</sup>; found 406.2376.

[α]<sub>D</sub>+12 (c 0.5, CHCl<sub>3</sub>).

HPLC analysis: Chiralpak IC Column, λ 250 nm, eluent: *n*-hexane / *i*-propanol 95/5. Flow: 1 mL/min

**two stereoisomers**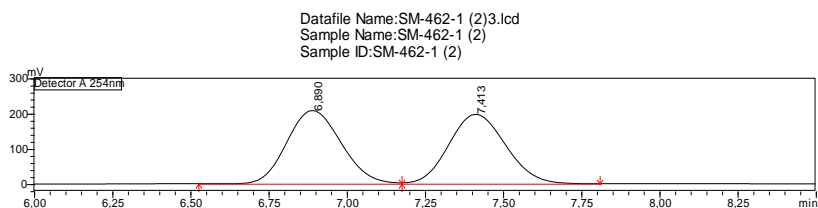

| Peaks | Retention time (min) | Area    | Area%   |
|-------|----------------------|---------|---------|
| 1     | 6,890                | 2508428 | 50,229  |
| 2     | 7,413                | 2485573 | 49,771  |
| total |                      | 4994001 | 100,000 |

**Stereoisomer 46b**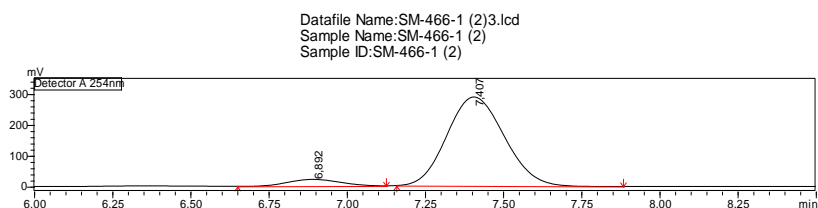

| Peaks | Retention time (min) | Area   | Area% |
|-------|----------------------|--------|-------|
| 1     | 6,892                | 246347 | 6,279 |

|       |       |         |         |
|-------|-------|---------|---------|
| 2     | 7,407 | 3677268 | 93,721  |
| total |       | 3923615 | 100,000 |

## X-ray Analysis

The X-ray intensity data were measured on Bruker D8 Venture and X8 APEXII diffractometer equipped with multilayer monochromator, Mo and Cu K/ $\alpha$  INCOATEC micro focus sealed tubes, Oxford and Kryoflex 2 cooling systems. The structure was solved by *direct methods* and refined by *full-matrix least-squares techniques*. Non-hydrogen atoms were refined with *anisotropic displacement parameters*. Hydrogen atoms were inserted at calculated positions and refined with riding model. The following software was used: *Bruker SAINT software package*<sup>6</sup> using a narrow-frame algorithm for frame integration, *SADABS*<sup>7</sup> for absorption correction, *OLEX2*<sup>8</sup> for structure solution, refinement, molecular diagrams and graphical user-interface, *Shelxle*<sup>9</sup> for refinement and graphical user-interface *SHELXS-2015*<sup>10</sup> for structure solution, *SHELXL-2015*<sup>10</sup> for refinement, *Platon*<sup>11</sup> for symmetry check. Experimental data and CCDC-Codes Experimental data and CCDC-Code (Available online: <http://www.ccdc.cam.ac.uk/conts/retrieving.html>) can be found in Table 1. Crystal data, data collection parameters, and structure refinement details are given in Tables 2 to 11. Crystal structures are visualized in Figures 1 to 5.

**Table 1** Experimental parameter and CCDC-Code.

| Sample     | Machine | Source | Temp. | Detector Distance | Time/Frame | #Frames | Frame width | CCDC    |
|------------|---------|--------|-------|-------------------|------------|---------|-------------|---------|
|            | Bruker  |        | [K]   | [mm]              | [s]        |         | [°]         |         |
| [(R,R)-24] | X8      | MO     | 130   | 40                | 15         | 759     | 0.500       | 1871505 |
| [(S,S)-24] | D8      | CU     | 100   | 40                | 14         | 9624    | 0.500       | 1571506 |
| [(R,R)-39] | X8      | MO     | 100   | 35                | 4.4        | 6792    | 0.500       | 1871509 |
| [(S)-3]    | X8      | MO     | 100   | 35                | 6          | 5208    | 0.500       | 1871507 |
| [(R)-3]    | D8      | MO     | 100   | 40                | 60         | 6737    | 0.700       | 1871508 |

**(2R,3R)-5-[methoxy(methyl)amino]-5-oxo-2,3-diphenyl-2-pentanyl diisopropylcarbamate, [(R,R)-24]**

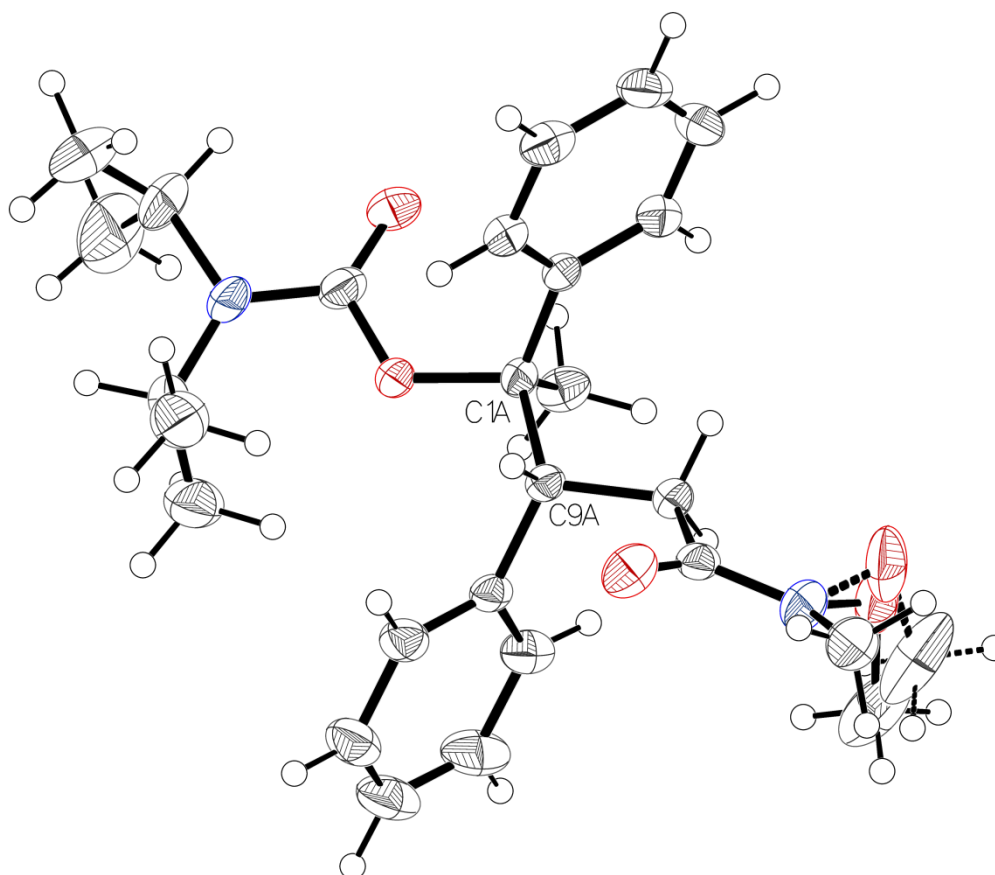

**Figure 1** Crystal structure of [(R,R)-24]. Anisotropic displacement ellipsoids visualized with 50% probability, second independent molecule of the asymmetric unit omitted for clarity. Chiral centres are proofed by Flack and Hooft parameter (-0.2(6)/ -0.3(4)). C1A, C9A (mol A), C1B, C9B (mol B) are in R-conformation. Bond precision: C-C = 0.0052 Å. Degree of disorder in mol A is 6%, in mol B 28%.

**Table 2** Sample and crystal data of [(R,R)-24].

|                                        |                                                               |                                         |                |            |
|----------------------------------------|---------------------------------------------------------------|-----------------------------------------|----------------|------------|
| <b>Chemical formula</b>                | C <sub>26</sub> H <sub>36</sub> N <sub>2</sub> O <sub>4</sub> | <b>Crystal system</b>                   | monoclinic     |            |
| <b>Formula weight [g/mol]</b>          | 440.57                                                        | <b>Space group</b>                      | C <sub>2</sub> |            |
| <b>Temperature [K]</b>                 | 130                                                           | <b>Z</b>                                | 8              |            |
| <b>Measurement method</b>              | \f and \w scans                                               | <b>Volume [Å<sup>3</sup>]</b>           | 4961.2(5)      |            |
| <b>Radiation (Wavelength [Å])</b>      | MoK $\alpha$ ( $\lambda$ = 0.71073)                           | <b>Unit cell dimensions [Å] and [°]</b> | 40.480(3)      | 90         |
| <b>Crystal size / [mm<sup>3</sup>]</b> | 0.4 × 0.15 × 0.06                                             |                                         | 6.4588(4)      | 115.105(2) |
| <b>Crystal habit</b>                   | clear colourless block                                        |                                         | 20.9553(11)    | 90         |

|                                             |           |                                              |       |
|---------------------------------------------|-----------|----------------------------------------------|-------|
| Density (calculated) / [g/cm <sup>3</sup> ] | 1.18      | Absorption coefficient / [mm <sup>-1</sup> ] | 0.079 |
| Abs. correction Tmin                        | 0.6485    | Abs. correction Tmax                         | 0.746 |
| Abs. correction type                        | multiscan | F(000) [e <sup>-</sup> ]                     | 1904  |

**Table 3** Data collection and structure refinement of [(R,R)-24].

|                                                  |                                        |                                     |                                                                                     |                           |
|--------------------------------------------------|----------------------------------------|-------------------------------------|-------------------------------------------------------------------------------------|---------------------------|
| Index ranges                                     | -56 ≤ h ≤ 55, -9 ≤ k ≤ 8, -29 ≤ l ≤ 29 | Theta range for data collection [°] | 2.146 to 60.182                                                                     |                           |
| Reflections number                               | 23848                                  | Data / restraints / parameters      | 14311/6/672                                                                         |                           |
| Refinement method                                | Least squares                          | Final R indices                     | all data                                                                            | R1 = 0.0865, wR2 = 0.1583 |
| Function minimized                               | $\Sigma w(F_o^2 - F_c^2)^2$            |                                     | l > 2σ(l)                                                                           | R1 = 0.0599, wR2 = 0.1409 |
| Goodness-of-fit on F <sup>2</sup>                | 1.033                                  | Weighting scheme                    | w=1/[σ <sup>2</sup> (F <sub>o</sub> <sup>2</sup> )+(0.0700P) <sup>2</sup> +1.9888P] |                           |
| Largest diff. peak and hole [e Å <sup>-3</sup> ] | 0.36/-0.36                             |                                     | where P=(F <sub>o</sub> <sup>2</sup> +2F <sub>c</sub> <sup>2</sup> )/3              |                           |

**(2*S*,3*S*)-5-[methoxy(methyl)amino]-5-oxo-2,3-diphenyl-2-pentanyl diisopropylcarbamate, [(*S,S*)-24]**

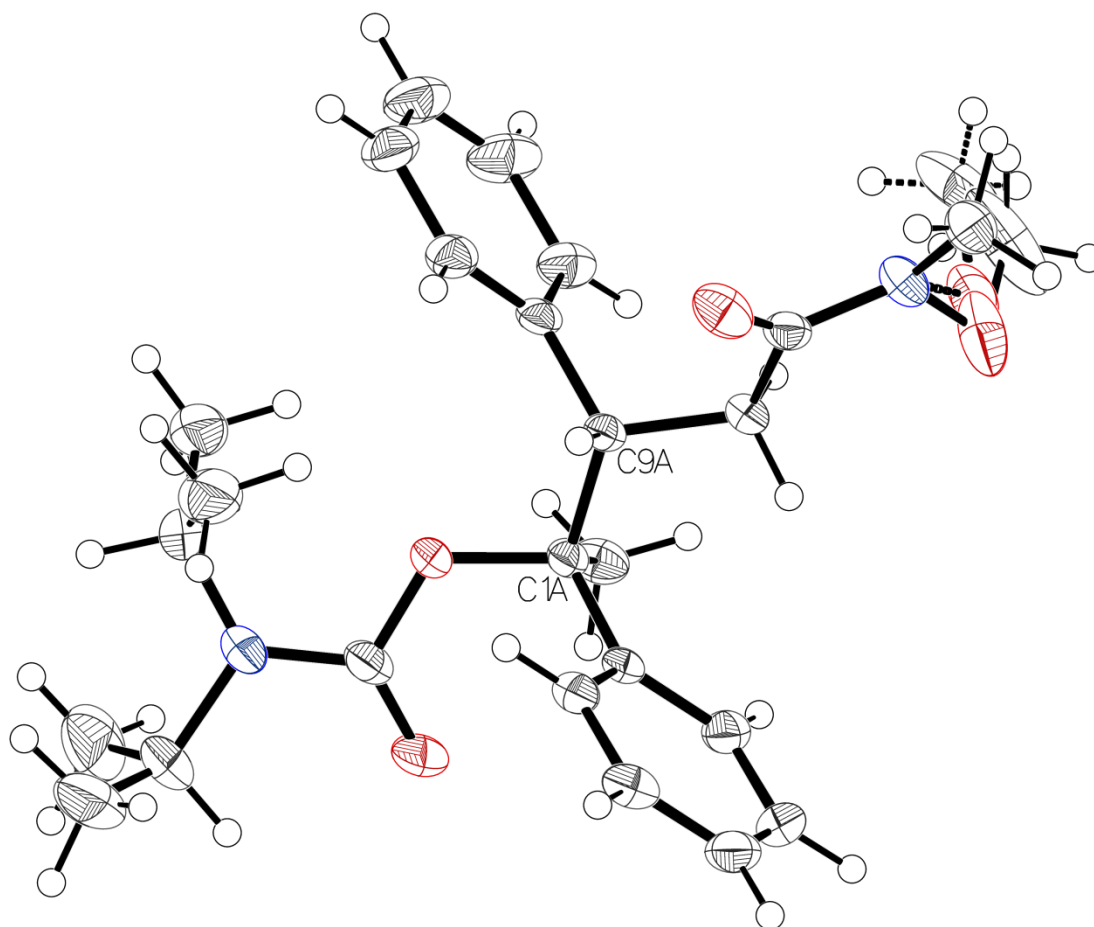

**Figure 2** Crystal structure of [(*S,S*)-24]. Anisotropic displacement ellipsoids visualized with 50% probability, second independent molecule of the asymmetric unit omitted for clarity. Chiral centres are proofed by Flack and Hooft parameter (-0.06(9)/ -0.03(2)). C1A, C9A (mol A), C1B, C9B (mol B) are in *S*-conformation. Bond precision: C-C = 0.0041 Å. Degree of disorder in mol A is 6%, in mol B 28% (identical as in [(*R,R*)-24], also the unit cell is very close).

**Table 4** Sample and crystal data of [(*S,S*)-24].

|                                        |                                                               |                                         |             |              |
|----------------------------------------|---------------------------------------------------------------|-----------------------------------------|-------------|--------------|
| <b>Chemical formula</b>                | C <sub>26</sub> H <sub>36</sub> N <sub>2</sub> O <sub>4</sub> | <b>Crystal system</b>                   | monoclinic  |              |
| <b>Formula weight [g/mol]</b>          | 440.57                                                        | <b>Space group</b>                      | <i>C</i> 2  |              |
| <b>Temperature [K]</b>                 | 100                                                           | <b>Z</b>                                | 8           |              |
| <b>Measurement method</b>              | \f and \w scans                                               | <b>Volume [Å<sup>3</sup>]</b>           | 4958.3(3)   |              |
| <b>Radiation (Wavelength [Å])</b>      | CuKα (λ = 1.54178)                                            | <b>Unit cell dimensions [Å] and [°]</b> | 40.5119(12) | 90           |
| <b>Crystal size / [mm<sup>3</sup>]</b> | 0.538 × 0.252 × 0.146                                         |                                         | 6.4473(2)   | 115.1286(11) |

|                                                  |                        |                                                   |            |    |
|--------------------------------------------------|------------------------|---------------------------------------------------|------------|----|
| <b>Crystal habit</b>                             | clear colourless block |                                                   | 20.9677(6) | 90 |
| <b>Density (calculated) / [g/cm<sup>3</sup>]</b> | 1.18                   | <b>Absorption coefficient / [mm<sup>-1</sup>]</b> | 0.633      |    |
| <b>Abs. correction Tmin</b>                      | 0.5632                 | <b>Abs. correction Tmax</b>                       | 0.7542     |    |
| <b>Abs. correction type</b>                      | multiscan              | <b>F(000) [e<sup>-</sup>]</b>                     | 1904       |    |

**Table 5** Data collection and structure refinement of [(S,S)-24].

|                                                       |                                        |                                            |                                                                                     |                           |
|-------------------------------------------------------|----------------------------------------|--------------------------------------------|-------------------------------------------------------------------------------------|---------------------------|
| <b>Index ranges</b>                                   | -51 ≤ h ≤ 50, -8 ≤ k ≤ 7, -26 ≤ l ≤ 26 | <b>Theta range for data collection [°]</b> | 4.654 to 158.346                                                                    |                           |
| <b>Reflections number</b>                             | 87898                                  | <b>Data / restraints / parameters</b>      | 10343/37/684                                                                        |                           |
| <b>Refinement method</b>                              | Least squares                          | <b>Final R indices</b>                     | all data                                                                            | R1 = 0.0518, wR2 = 0.1392 |
| <b>Function minimized</b>                             | $\Sigma w(F_o^2 - F_c^2)^2$            |                                            | l > 2σ(l)                                                                           | R1 = 0.0516, wR2 = 0.1388 |
| <b>Goodness-of-fit on F<sup>2</sup></b>               | 1.012                                  | <b>Weighting scheme</b>                    | w=1/[σ <sup>2</sup> (F <sub>o</sub> <sup>2</sup> )+(0.0927P) <sup>2</sup> +3.0127P] |                           |
| <b>Largest diff. peak and hole [e Å<sup>-3</sup>]</b> | 0.40/-0.33                             |                                            | where P=(F <sub>o</sub> <sup>2</sup> +2F <sub>c</sub> <sup>2</sup> )/3              |                           |



tert-butyl (2R)-2-[(2R)-2-phenylpropanoyl]pyrrolidine-1-carboxylate, [(R,R)-39]

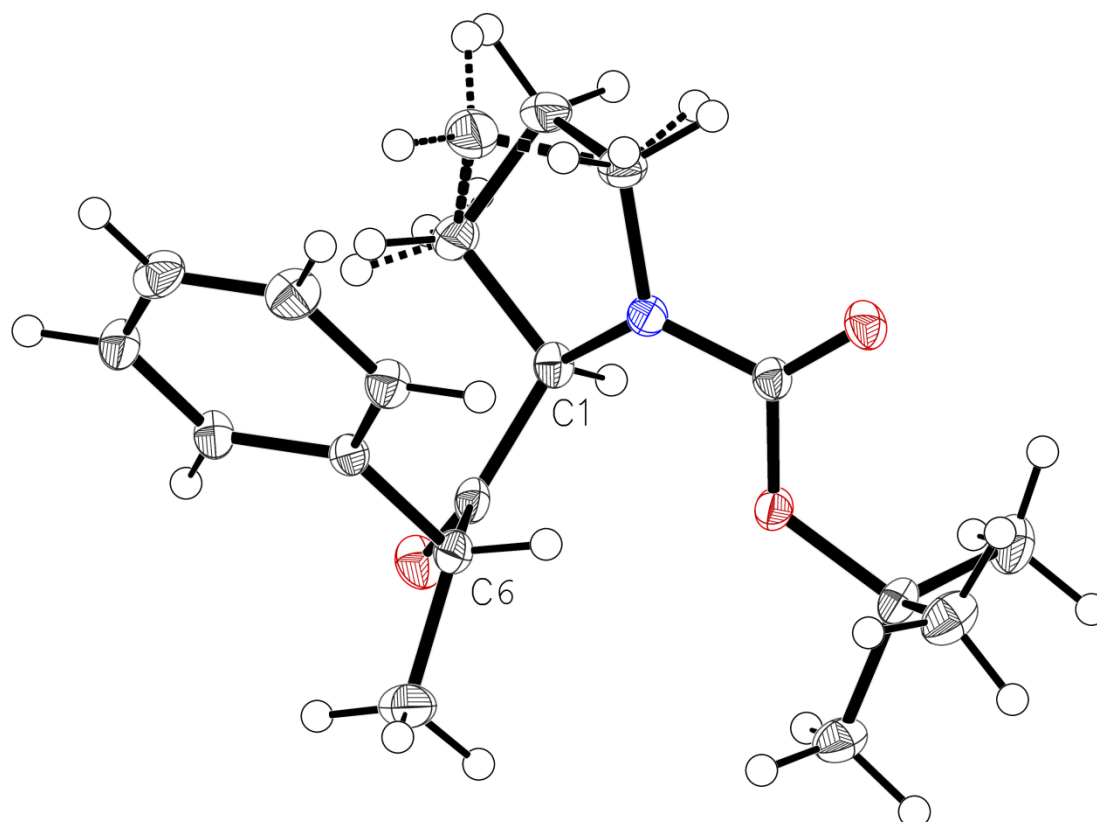

**Figure 3** Asymmetric Unit of [(R,R)-39]. Anisotropic displacement ellipsoids visualized with 50% probability, second independent molecule of the asymmetric unit omitted for clarity. Chiral centres are proofed by Flack and Hooft parameter ( $-0.2(4)/-0.1(3)$ ). C1, C6 are in S-conformation. Bond precision: C-C = 0.0041 Å. Degree of disorder is 6%.

**Table 6** Sample and crystal data of [(R,R)-39].

|                                                  |                                                 |                                                   |                         |            |
|--------------------------------------------------|-------------------------------------------------|---------------------------------------------------|-------------------------|------------|
| <b>Chemical formula</b>                          | C <sub>18</sub> H <sub>25</sub> NO <sub>3</sub> | <b>Crystal system</b>                             | monoclinic              |            |
| <b>Formula weight [g/mol]</b>                    | 303.39                                          | <b>Space group</b>                                | <i>P</i> 2 <sub>1</sub> |            |
| <b>Temperature [K]</b>                           | 100                                             | <b>Z</b>                                          | 2                       |            |
| <b>Measurement method</b>                        | \f and \w scans                                 | <b>Volume [Å<sup>3</sup>]</b>                     | 830.69(18)              |            |
| <b>Radiation (Wavelength [Å])</b>                | MoK $\alpha$ ( $\lambda = 0.71073$ )            | <b>Unit cell dimensions [Å] and [°]</b>           | 5.9751(7)               | 90         |
| <b>Crystal size / [mm<sup>3</sup>]</b>           | 0.4 × 0.1 × 0.1                                 |                                                   | 17.5321(18)             | 104.061(6) |
| <b>Crystal habit</b>                             | clear colourless block                          |                                                   | 8.1747(12)              | 90         |
| <b>Density (calculated) / [g/cm<sup>3</sup>]</b> | 1.213                                           | <b>Absorption coefficient / [mm<sup>-1</sup>]</b> | 0.082                   |            |

|                             |           |                               |        |
|-----------------------------|-----------|-------------------------------|--------|
| <b>Abs. correction Tmin</b> | 0.7579    | <b>Abs. correction Tmax</b>   | 0.8879 |
| <b>Abs. correction type</b> | multiscan | <b>F(000) [e<sup>-</sup>]</b> | 328    |

**Table 7** Data collection and structure refinement of [(R,R)-39].

|                                                       |                                                            |                                            |                                             |                           |
|-------------------------------------------------------|------------------------------------------------------------|--------------------------------------------|---------------------------------------------|---------------------------|
| <b>Index ranges</b>                                   | $-8 \leq h \leq 8, -24 \leq k \leq 24, -11 \leq l \leq 11$ | <b>Theta range for data collection [°]</b> | 4.646 to 60.062                             |                           |
| <b>Reflections number</b>                             | 60880                                                      | <b>Data / restraints / parameters</b>      | 4872/1/212                                  |                           |
| <b>Refinement method</b>                              | Least squares                                              | <b>Final R indices</b>                     | all data                                    | R1 = 0.0388, wR2 = 0.0940 |
| <b>Function minimized</b>                             | $\sum w(F_o^2 - F_c^2)^2$                                  |                                            | $I > 2\sigma(I)$                            | R1 = 0.0361, wR2 = 0.0921 |
| <b>Goodness-of-fit on F<sup>2</sup></b>               | 1.035                                                      | <b>Weighting scheme</b>                    | $w=1/[\sigma^2(F_o^2)+(0.0465P)^2+0.1757P]$ |                           |
| <b>Largest diff. peak and hole [e Å<sup>-3</sup>]</b> | 0.22/-0.20                                                 |                                            | where $P=(F_o^2+2F_c^2)/3$                  |                           |

**(S)-1-(3-bromophenyl)-1-oxo-4-phenyl-2-butanyl diisopropylcarbamate, [(S)-3]**

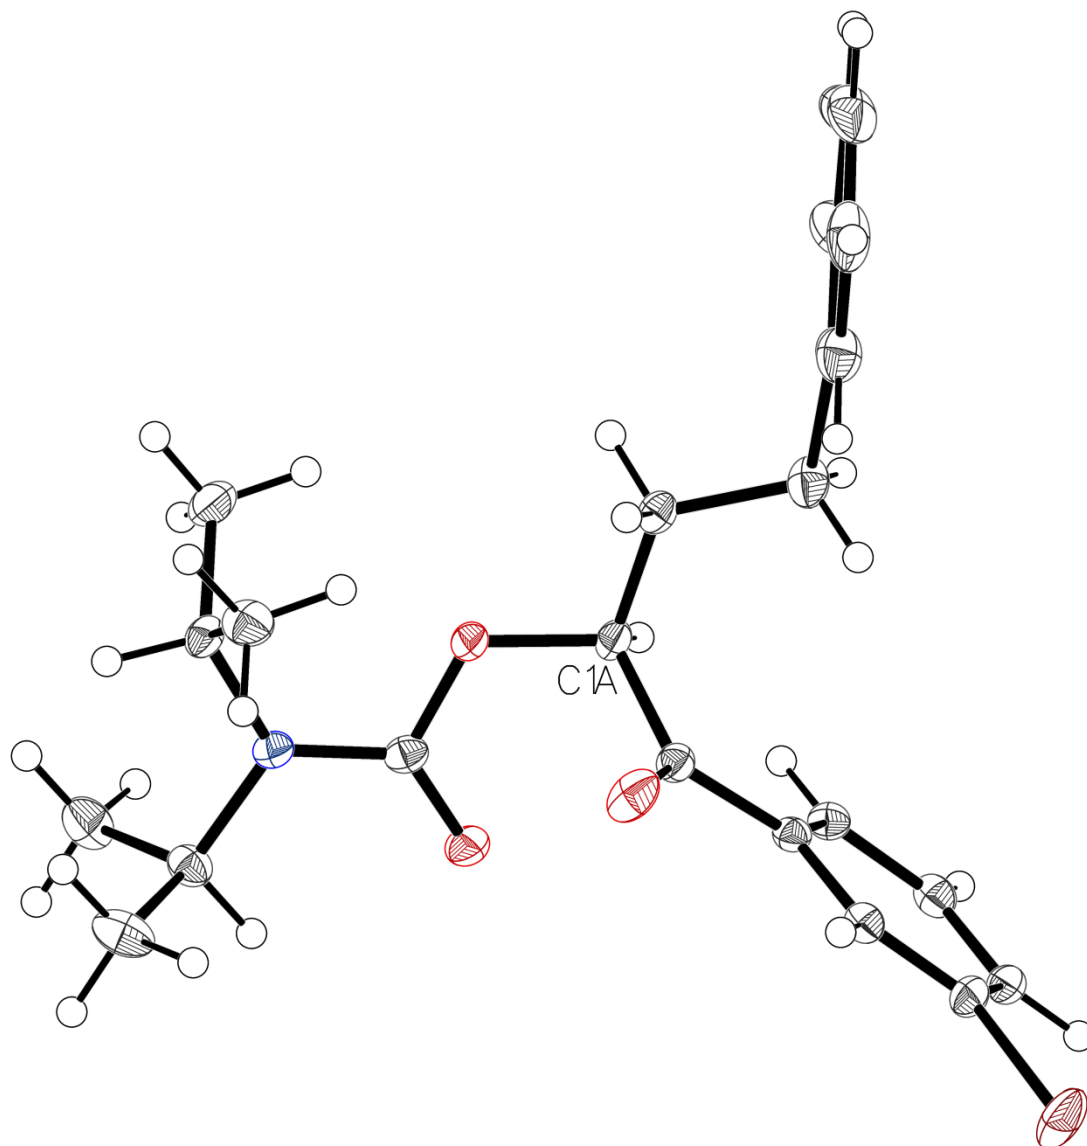

**Figure 4** Asymmetric Unit of [(S)-3]. Anisotropic displacement ellipsoids visualized with 50% probability, second independent molecule of the asymmetric unit omitted for clarity. Chiral centres are proofed by Flack and Hooft parameter (0.022(3) / 0.034(3)). C1A (mol A), C1B (mol B) are in S-conformation. Bond precision: C-C = 0.0043 Å.

**Table 8** Sample and crystal data of [(S)-3]

|                                   |                                                   |                                         |             |           |
|-----------------------------------|---------------------------------------------------|-----------------------------------------|-------------|-----------|
| <b>Chemical formula</b>           | C <sub>23</sub> H <sub>28</sub> BrNO <sub>3</sub> | <b>Crystal system</b>                   | triclinic   |           |
| <b>Formula weight [g/mol]</b>     | 446.37                                            | <b>Space group</b>                      | <i>P</i> 1  |           |
| <b>Temperature [K]</b>            | 100                                               | <b>Z</b>                                | 2           |           |
| <b>Measurement method</b>         | \f and \w scans                                   | <b>Volume [Å<sup>3</sup>]</b>           | 1083.53(10) |           |
| <b>Radiation (Wavelength [Å])</b> | MoKα (λ = 0.71073)                                | <b>Unit cell dimensions [Å] and [°]</b> | 5.7959(3)   | 99.170(3) |

|                                                  |                           |                                                   |            |           |
|--------------------------------------------------|---------------------------|---------------------------------------------------|------------|-----------|
| <b>Crystal size / [mm<sup>3</sup>]</b>           | 0.2 × 0.03 × 0.03         |                                                   | 13.0795(7) | 98.366(3) |
| <b>Crystal habit</b>                             | clear colourless<br>block |                                                   | 14.8490(8) | 98.188(3) |
| <b>Density (calculated) / [g/cm<sup>3</sup>]</b> | 1.368                     | <b>Absorption coefficient / [mm<sup>-1</sup>]</b> | 1.919      |           |
| <b>Abs. correction Tmin</b>                      | 0.546                     | <b>Abs. correction Tmax</b>                       | 0.746      |           |
| <b>Abs. correction type</b>                      | multiscan                 | <b>F(000) [e<sup>-</sup>]</b>                     | 464        |           |

**Table 9** Data collection and structure refinement of [(S)-3]

|                                                       |                                        |                                            |                                     |                           |
|-------------------------------------------------------|----------------------------------------|--------------------------------------------|-------------------------------------|---------------------------|
| <b>Index ranges</b>                                   | -8 ≤ h ≤ 8, -18 ≤ k ≤ 18, -21 ≤ l ≤ 20 | <b>Theta range for data collection [°]</b> | 4.64 to 61.108                      |                           |
| <b>Reflections number</b>                             | 72072                                  | <b>Data / restraints / parameters</b>      | 12925/3/513                         |                           |
| <b>Refinement method</b>                              | Least squares                          | <b>Final R indices</b>                     | all data                            | R1 = 0.0433, wR2 = 0.0691 |
| <b>Function minimized</b>                             | $\sum w(F_o^2 - F_c^2)^2$              |                                            | l > 2σ(l)                           | R1 = 0.0323, wR2 = 0.0658 |
| <b>Goodness-of-fit on F<sup>2</sup></b>               | 1.037                                  | <b>Weighting scheme</b>                    | $w=1/[\sigma^2(F_o^2)+(0.0218P)^2]$ |                           |
| <b>Largest diff. peak and hole [e Å<sup>-3</sup>]</b> | 0.46/-0.58                             |                                            | where $P=(F_o^2+2F_c^2)/3$          |                           |

**(R)-1-(3-bromophenyl)-1-oxo-4-phenyl-2-butanyl diisopropylcarbamate, [(R)-3]**

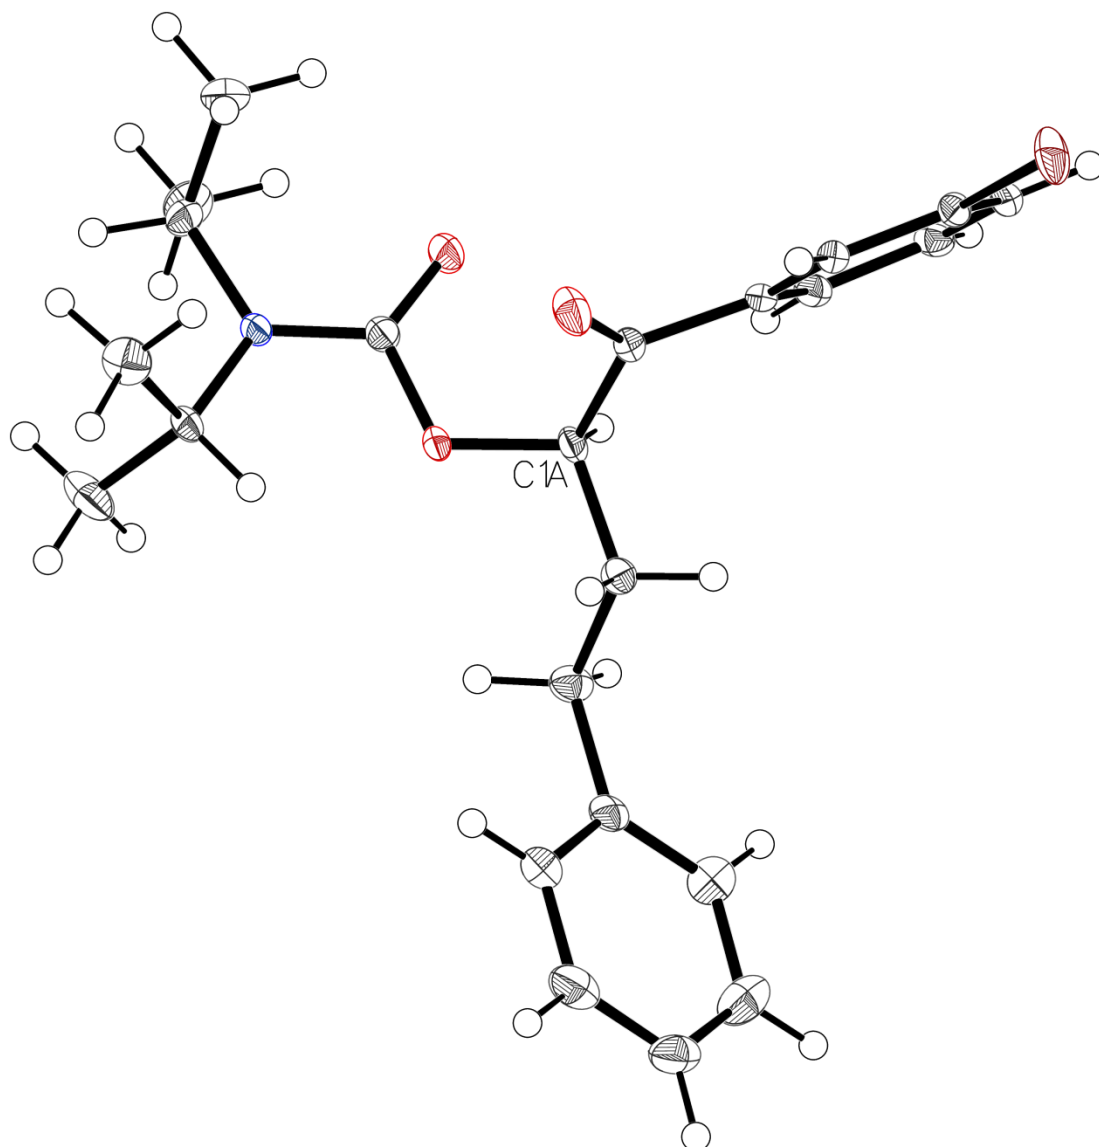

**Figure 5** Crystal structure of [(R)-3]. Anisotropic displacement ellipsoids visualized with 50% probability, second independent molecule of the asymmetric unit omitted for clarity. Chiral centres are proofed by Flack and Hooft parameter (-0.009(6)/ -0.0086(19)). C1A (mol A), C1B (mol B) are in R-conformation. Bond precision: C-C = 0.0049 Å. The unit cell of [(S)-3] is very close.

**Table 10** Sample and crystal data of [(R)-3]

|                                                  |                                                   |                                                   |             |           |
|--------------------------------------------------|---------------------------------------------------|---------------------------------------------------|-------------|-----------|
| <b>Chemical formula</b>                          | C <sub>23</sub> H <sub>28</sub> BrNO <sub>3</sub> | <b>Crystal system</b>                             | triclinic   |           |
| <b>Formula weight [g/mol]</b>                    | 446.37                                            | <b>Space group</b>                                | <i>P</i> 1  |           |
| <b>Temperature [K]</b>                           | 100                                               | <b>Z</b>                                          | 2           |           |
| <b>Measurement method</b>                        | \f and \w scans                                   | <b>Volume [Å<sup>3</sup>]</b>                     | 1084.98(16) |           |
| <b>Radiation (Wavelength [Å])</b>                | MoK $\alpha$ ( $\lambda = 0.71073$ )              | <b>Unit cell dimensions [Å] and [°]</b>           | 5.7915(5)   | 99.147(3) |
| <b>Crystal size / [mm<sup>3</sup>]</b>           | 0.446 × 0.041 × 0.028                             |                                                   | 13.0931(11) | 98.283(3) |
| <b>Crystal habit</b>                             | clear colourless block                            |                                                   | 14.8582(13) | 98.156(3) |
| <b>Density (calculated) / [g/cm<sup>3</sup>]</b> | 1.366                                             | <b>Absorption coefficient / [mm<sup>-1</sup>]</b> | 1.917       |           |
| <b>Abs. correction Tmin</b>                      | 0.4964                                            | <b>Abs. correction Tmax</b>                       | 0.746       |           |
| <b>Abs. correction type</b>                      | multiscan                                         | <b>F(000) [e<sup>-</sup>]</b>                     | 464         |           |

**Table 11** Data collection and structure refinement of [(R)-3]

|                                                       |                                        |                                            |                                             |                           |
|-------------------------------------------------------|----------------------------------------|--------------------------------------------|---------------------------------------------|---------------------------|
| <b>Index ranges</b>                                   | -8 ≤ h ≤ 8, -18 ≤ k ≤ 18, -20 ≤ l ≤ 20 | <b>Theta range for data collection [°]</b> | 4.632 to 60.134                             |                           |
| <b>Reflections number</b>                             | 45166                                  | <b>Data / restraints / parameters</b>      | 12477/3/513                                 |                           |
| <b>Refinement method</b>                              | Least squares                          | <b>Final R indices</b>                     | all data                                    | R1 = 0.0433, wR2 = 0.0981 |
| <b>Function minimized</b>                             | $\sum w(F_o^2 - F_c^2)^2$              |                                            | $I > 2\sigma(I)$                            | R1 = 0.0394, wR2 = 0.0959 |
| <b>Goodness-of-fit on F<sup>2</sup></b>               | 1.076                                  | <b>Weighting scheme</b>                    | $w=1/[\sigma^2(F_o^2)+(0.0608P)^2+0.2722P]$ |                           |
| <b>Largest diff. peak and hole [e Å<sup>-3</sup>]</b> | 0.67/-0.67                             |                                            | where $P=(F_o^2+2F_c^2)/3$                  |                           |

## References.

- 1 a) J. L. Stymiest, G. Dutheuil, A. Mahmood and V. K. Aggarwal, *Angew. Chem. Int. Ed.*, 2007, **46**, 7491; b) D. J. Blair, C. J. Fletcher, K. M. Wheelhouse and V. K. Aggarwal, *Angew. Chem. Int. Ed.*, 2014, **53**, 5552.
- 2 V. Pace, L. Castoldi, A. R. Alcántara and W. Holzer, *RSC Adv.*, 2013, **3**, 10158.
- 3 A. Carstens and D. Hoppe, *Tetrahedron*, 1994, **50**, 6097.
- 4 R. K. Dieter, G. Oba, K. R. Chandupatla, C. M. Topping, K. Lu and R. T. Watson, *J. Org. Chem.*, 2004, **69**, 3076.
- 5 D. Ferraris, Y.-S. Ko, D. Calvin, T. Chiou, S. Lautar, B. Thomas, K. Wozniak, C. Rojas, V. Kalish and S. Belyakov, *Bioorg. Med. Chem. Lett.*, 2004, **14**, 5579.
- 6 Bruker SAINT V7.68A & v8.37A Copyright © 2005.
- 7 G. Sheldrick, *Institute for Inorganic Chemistry, University of Göttingen, Germany*, 1996, **33**.
- 8 O. V. Dolomanov, L. J. Bourhis, R. J. Gildea, J. A. Howard and H. Puschmann, *J. Appl. Crystallogr.*, 2009, **42**, 339.
- 9 C. B. Hübschle, G. M. Sheldrick and B. Dittrich, *J. Appl. Crystallogr.*, 2011, **44**, 1281.
- 10 G. M. Sheldrick, *Acta Cryst. C*, 2015, **71**, 3.
- 11 A. Spek, *Acta Cryst. D*, 2009, **65**, 148.

**Copies of NMR Spectra ( $^1\text{H}$  and  $^{13}\text{C}$ )**



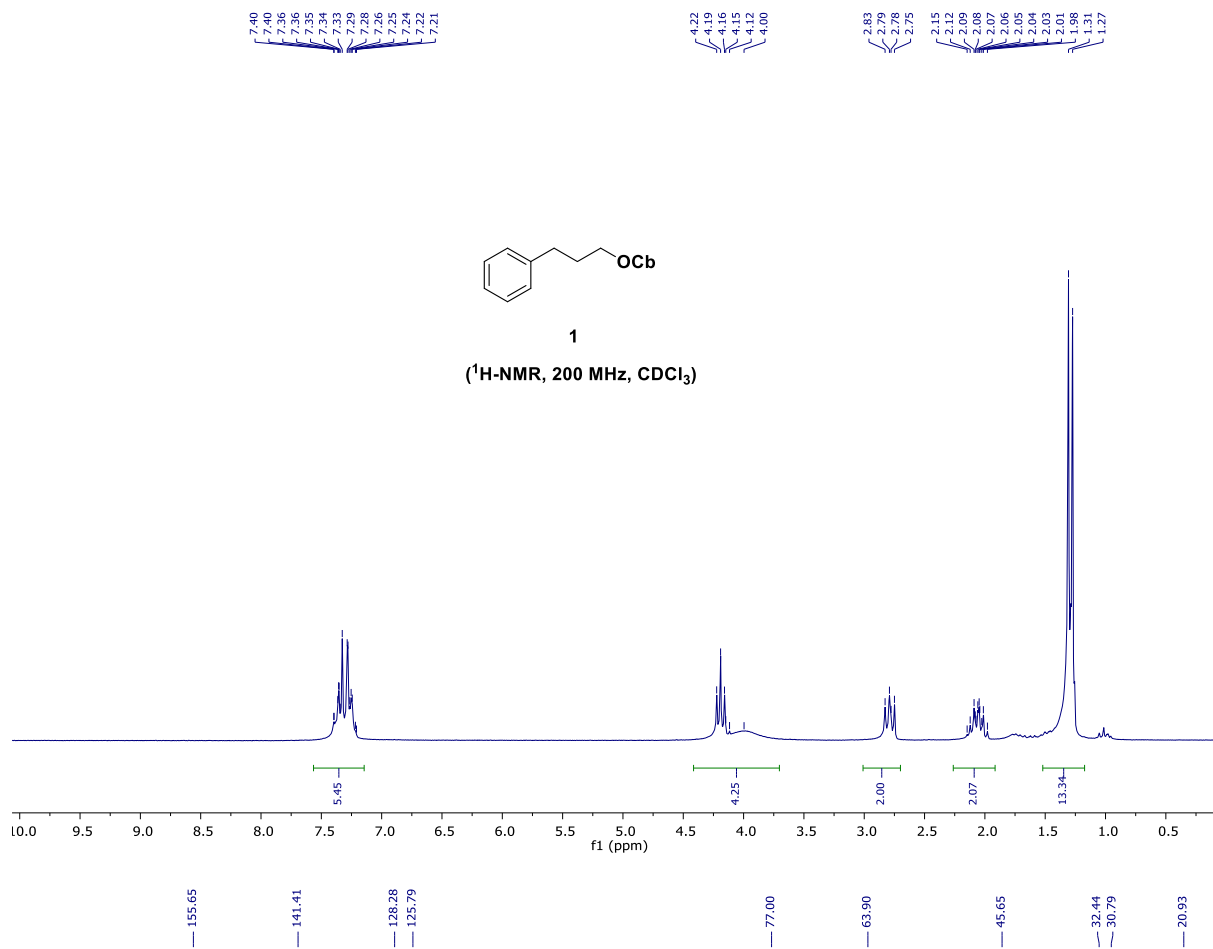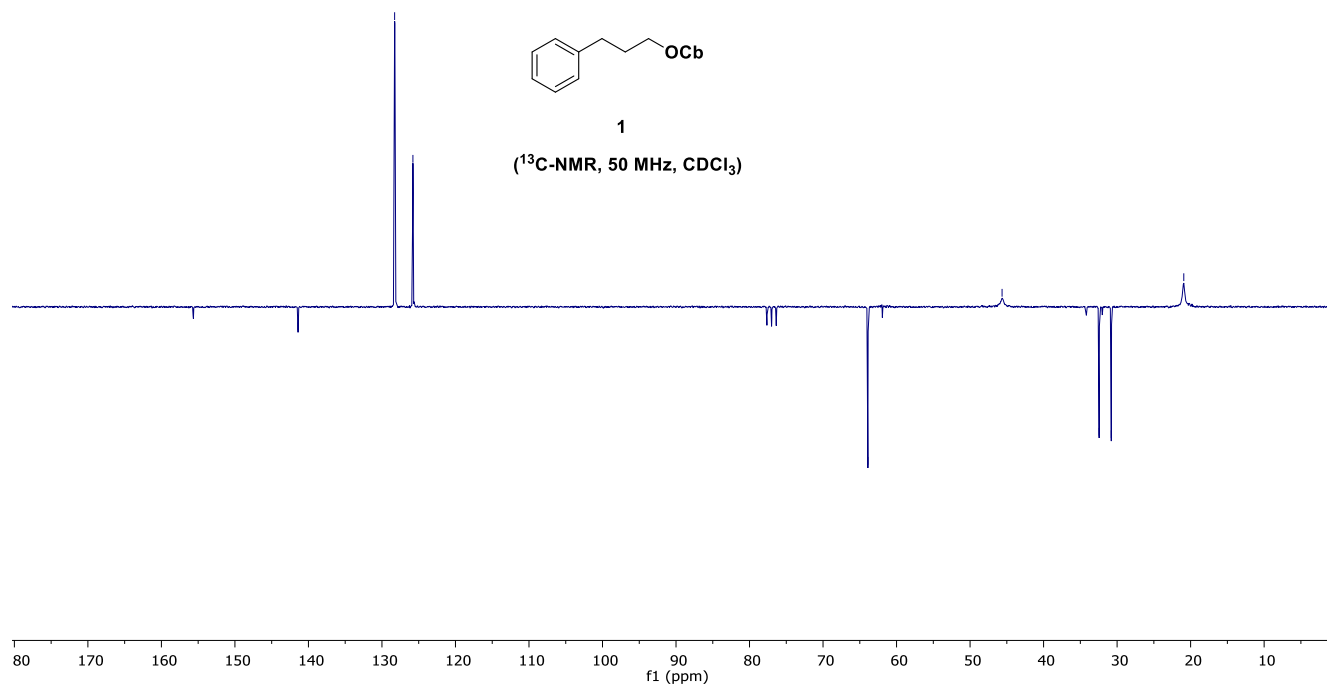

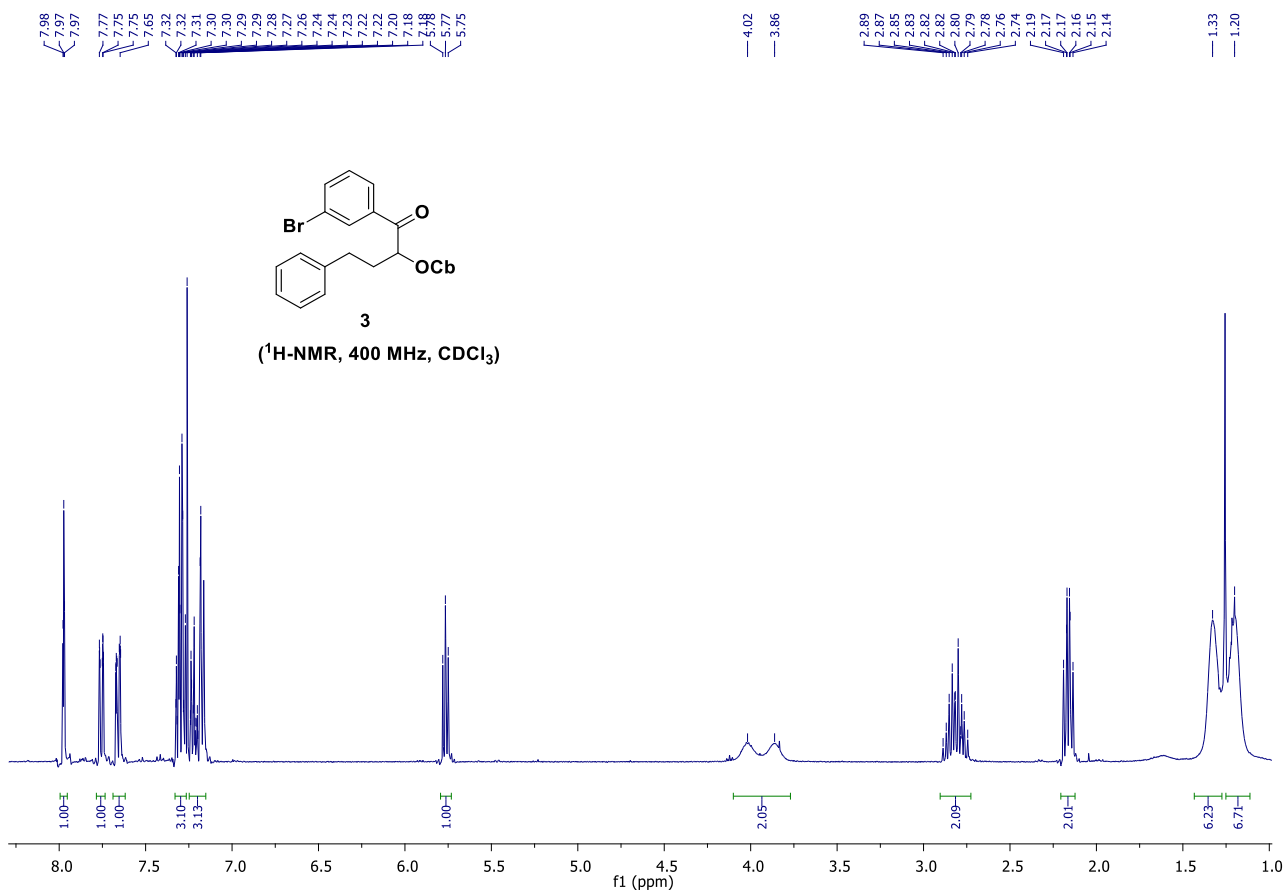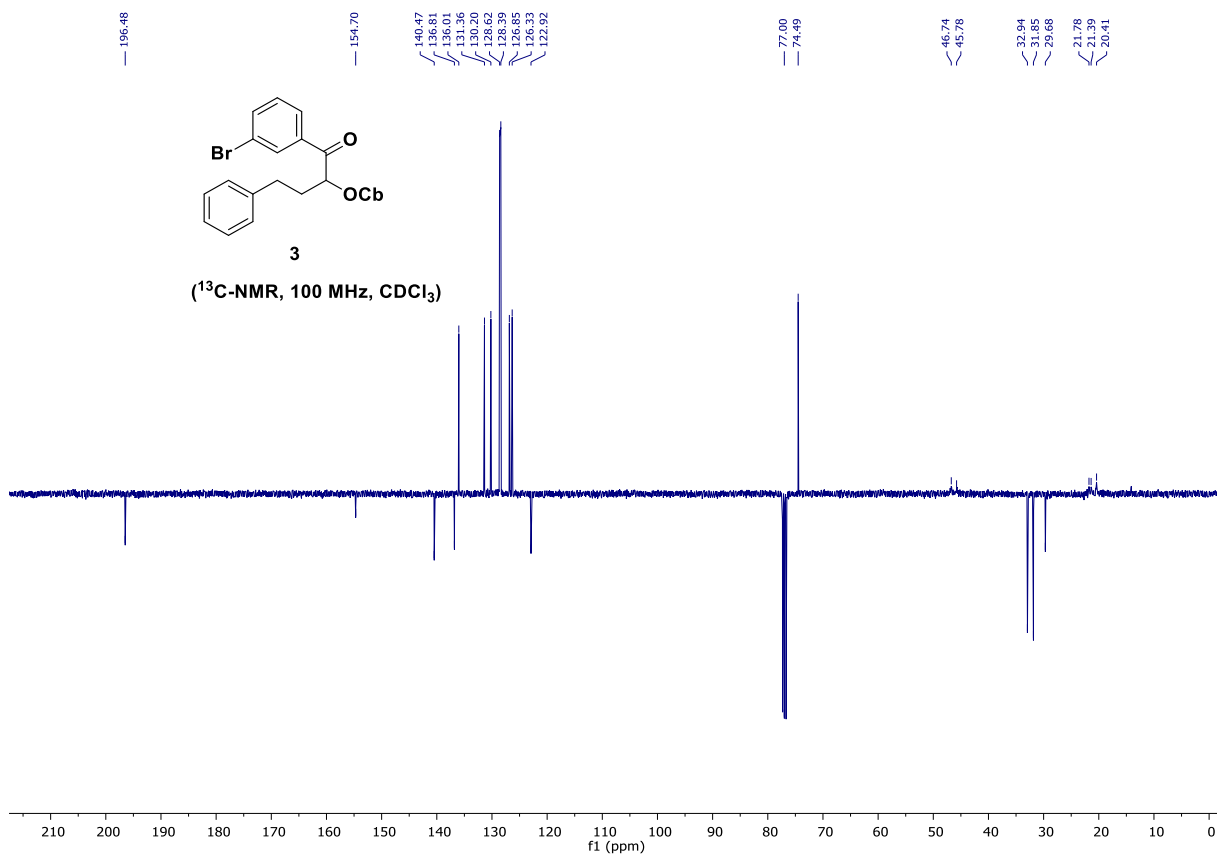

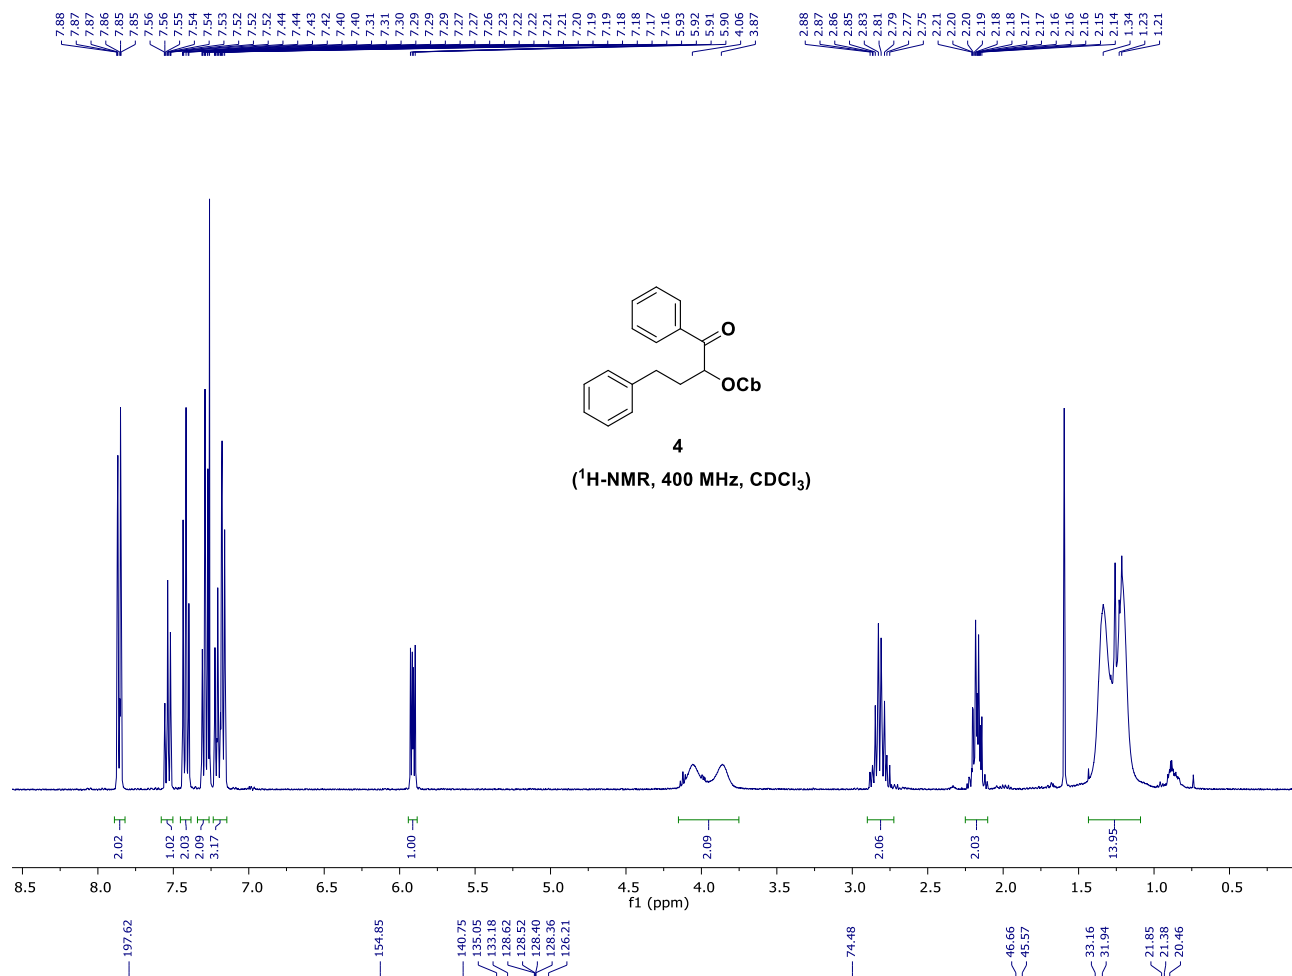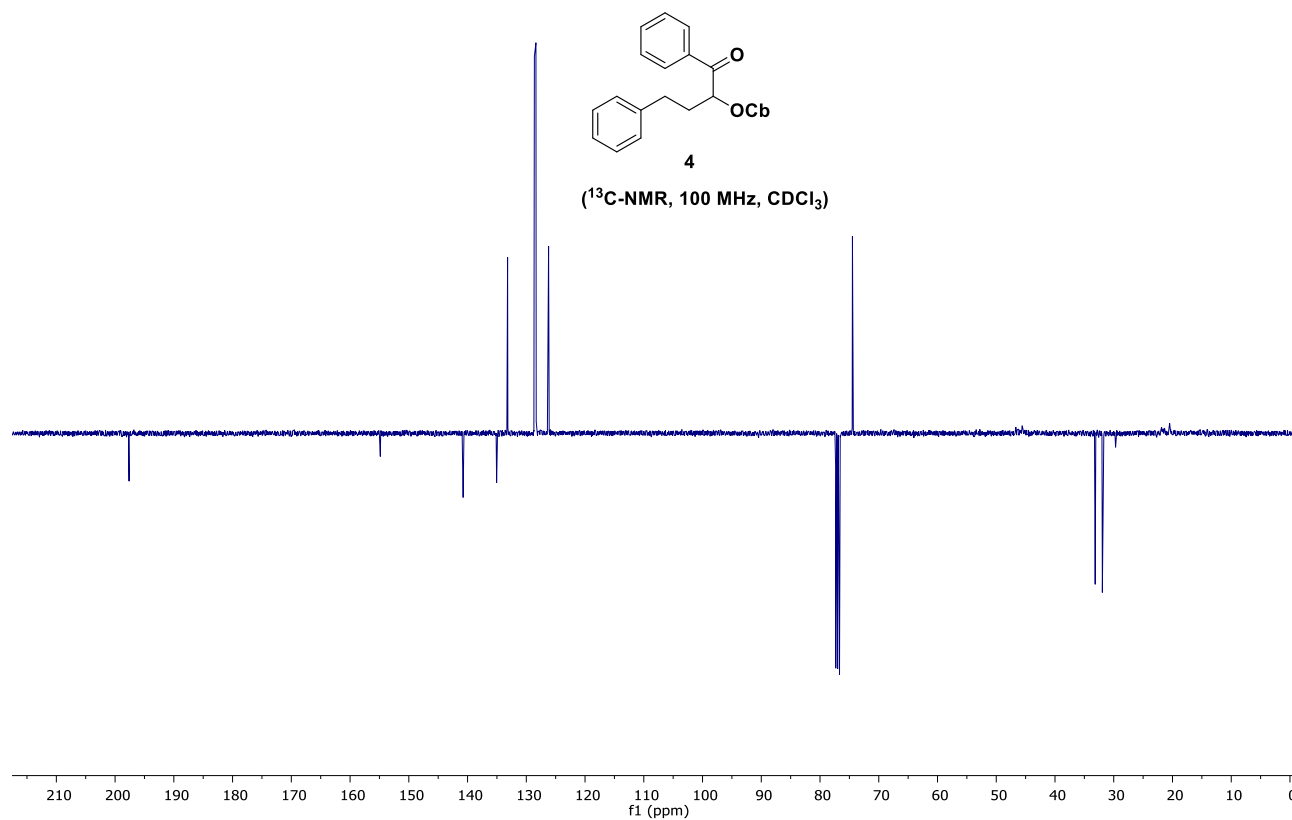

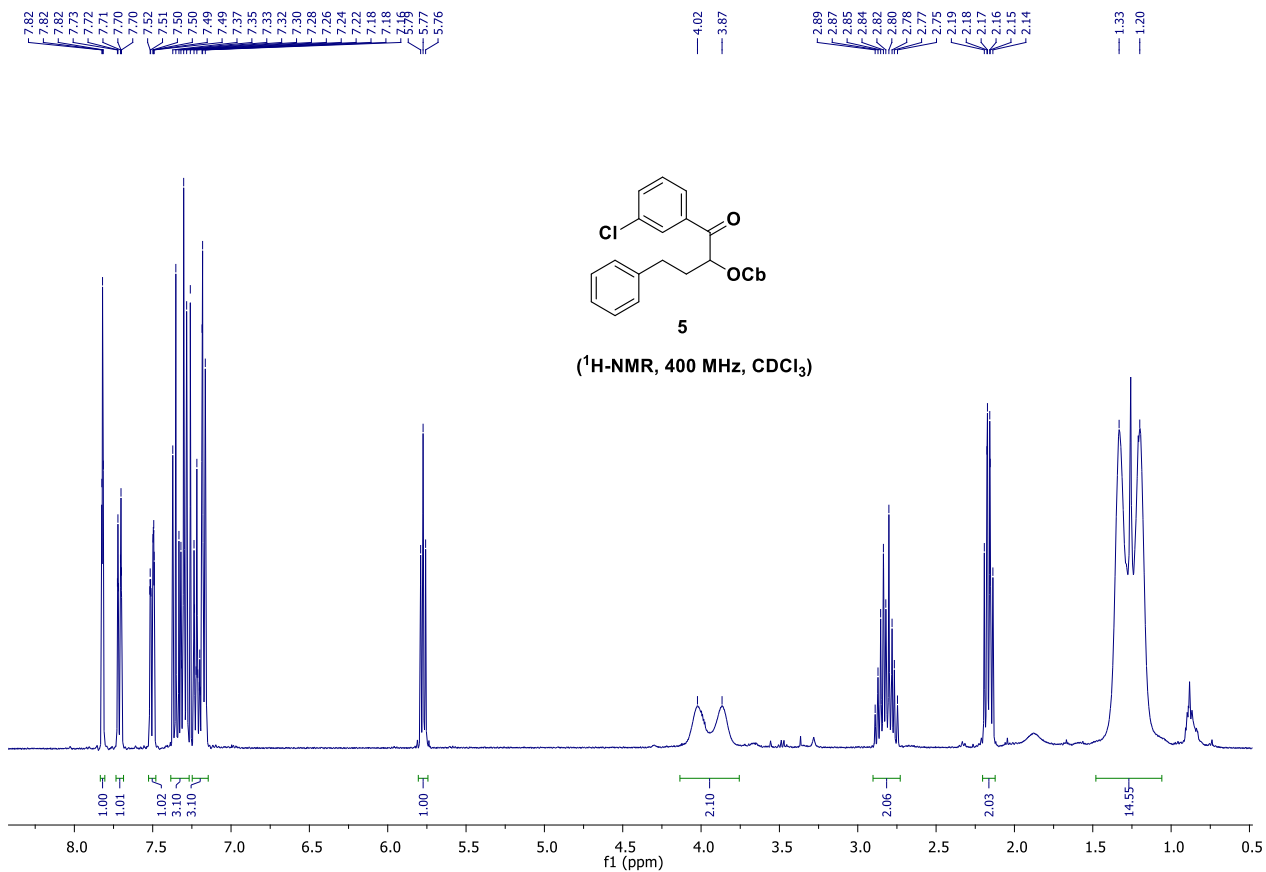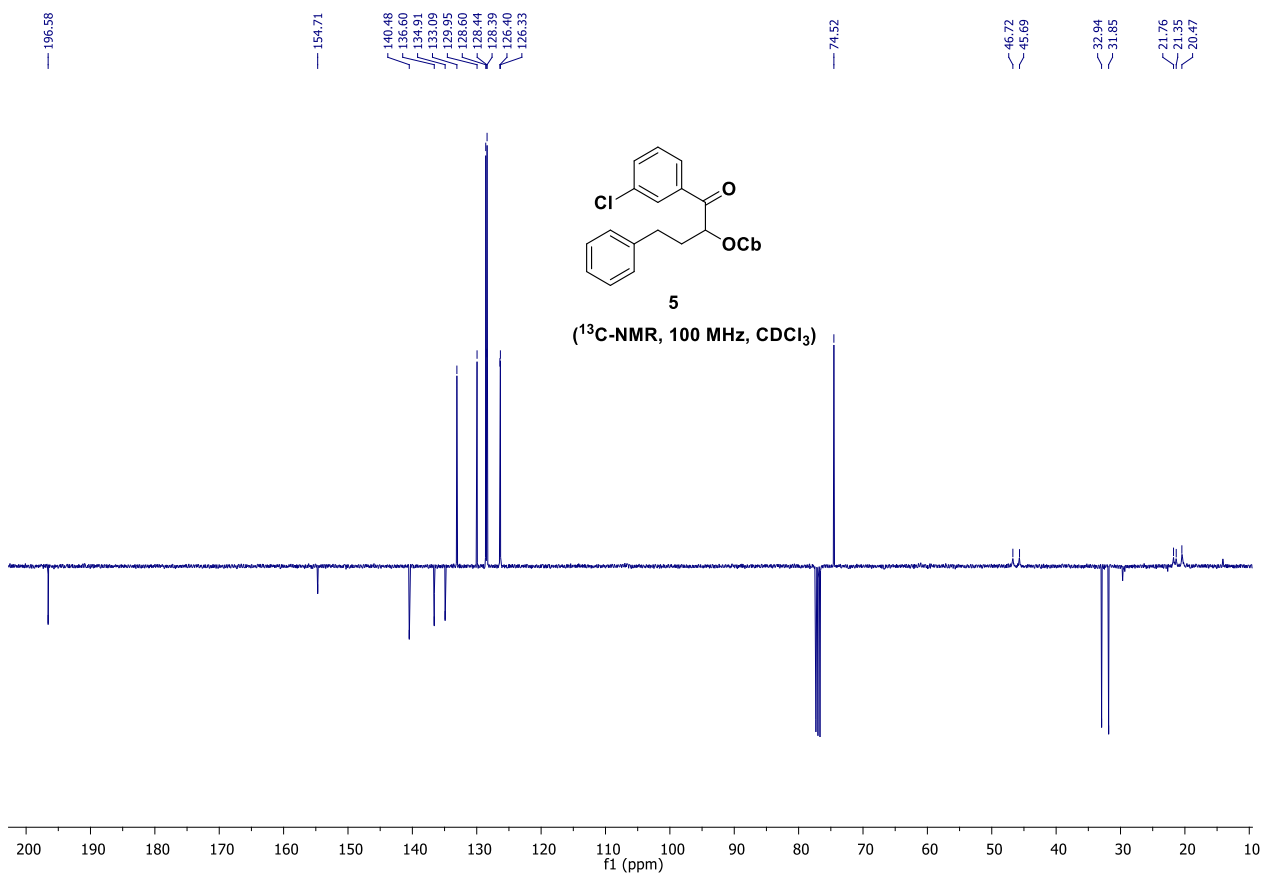

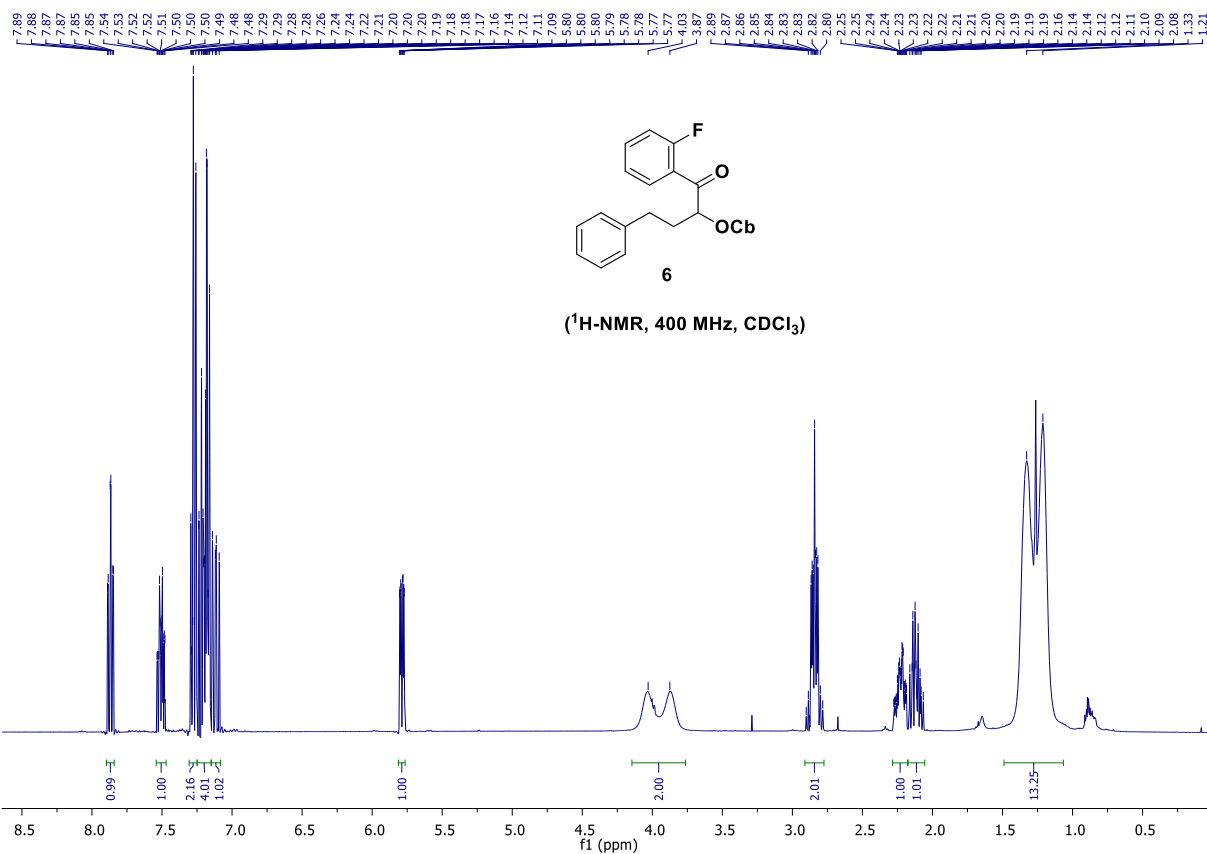

- 195.86
- 195.81
- 162.50
- 159.98
- 154.81
- 140.93
- 134.65
- 134.56
- 131.10
- 131.07
- 128.43
- 128.31
- 126.10
- 124.58
- 124.55
- 123.76
- 123.75
- 116.63
- 116.39
- 78.05
- 77.98
- 46.58
- 45.63
- 32.37
- 32.36
- 32.30
- 21.71
- 21.35
- 20.48

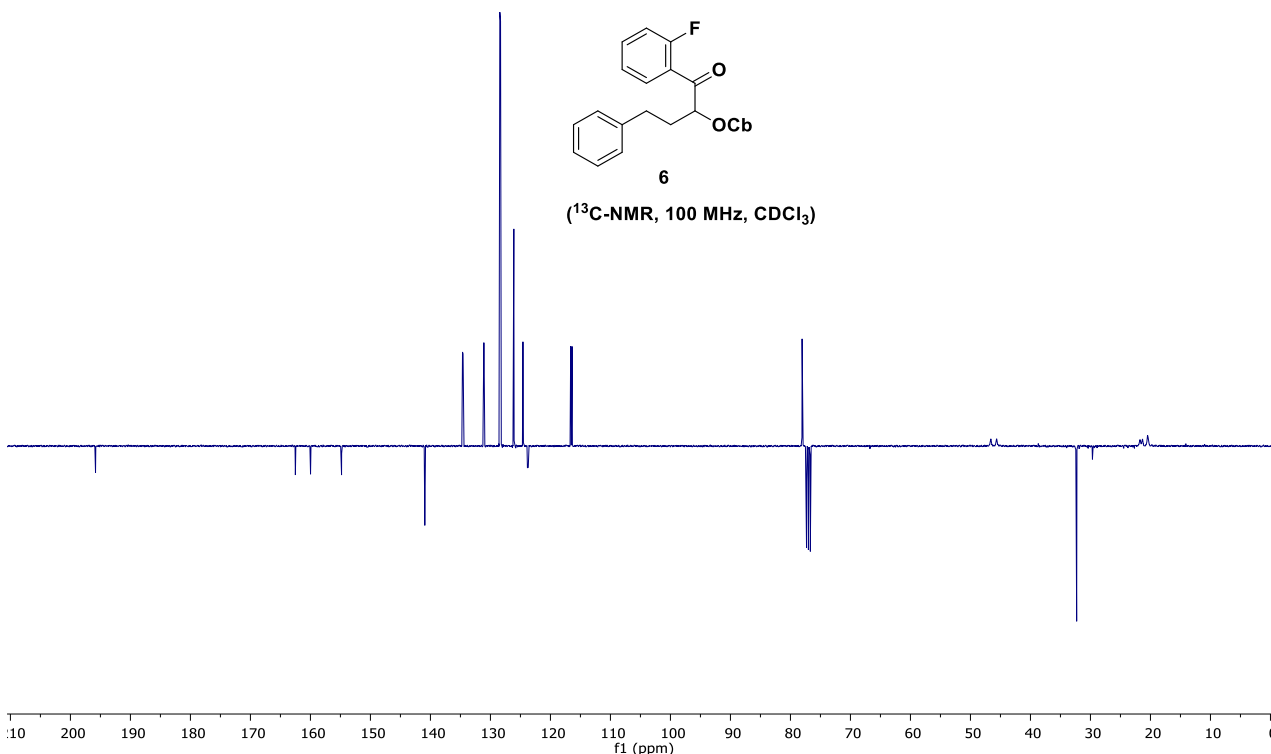

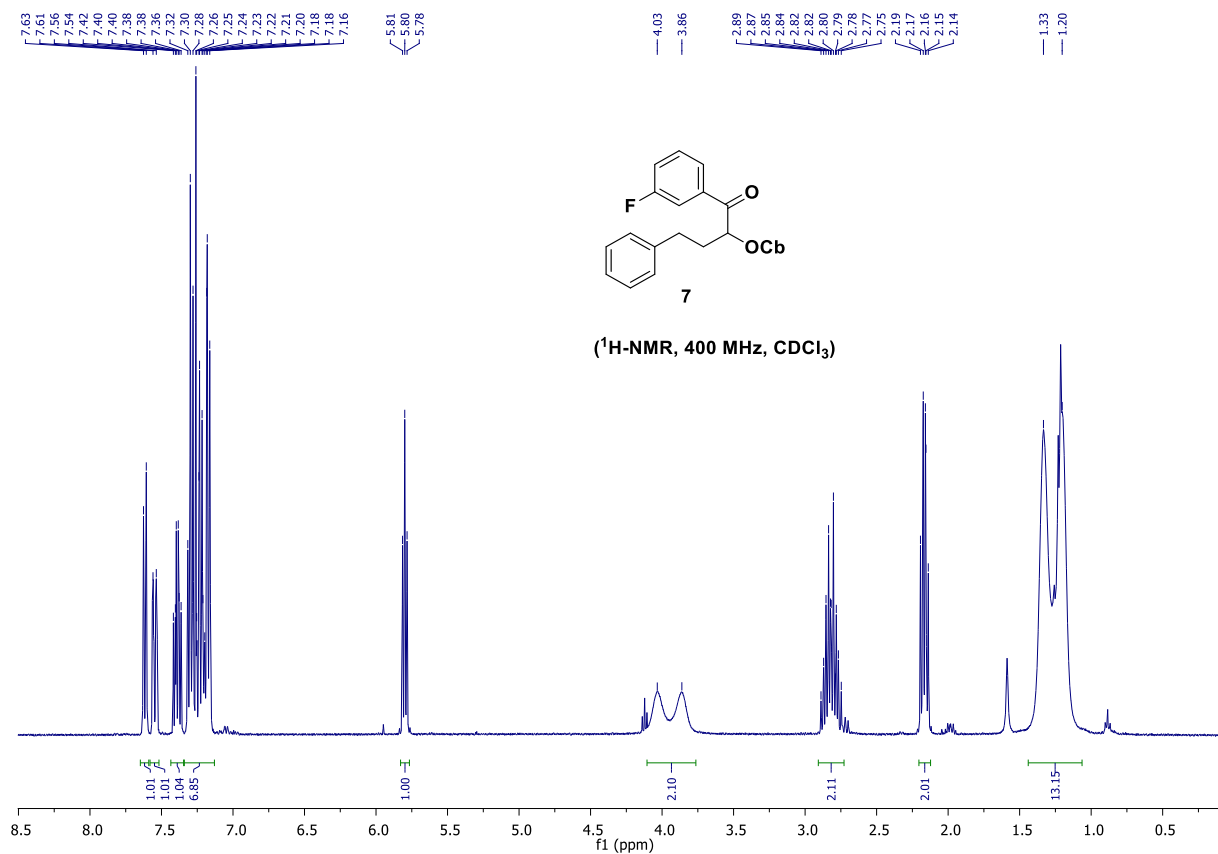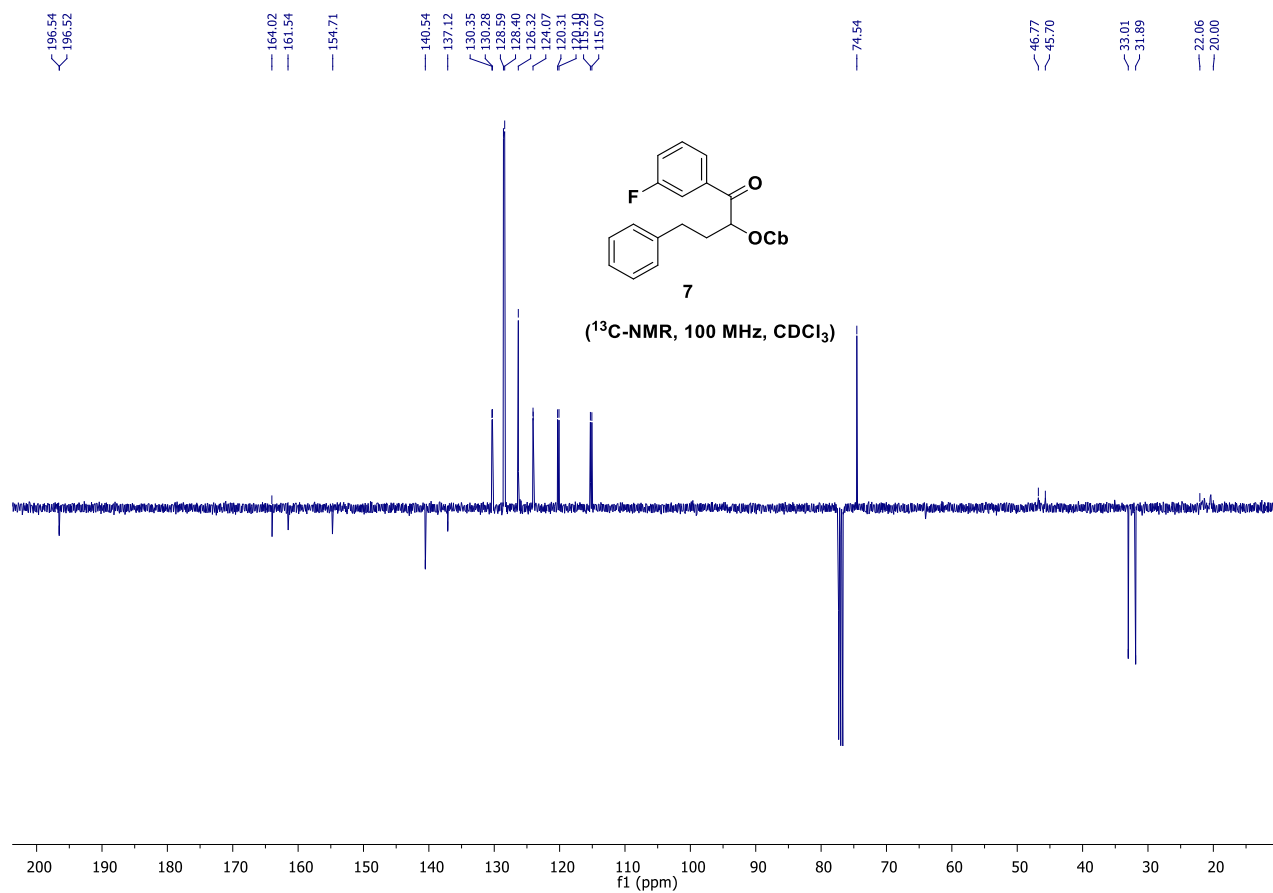

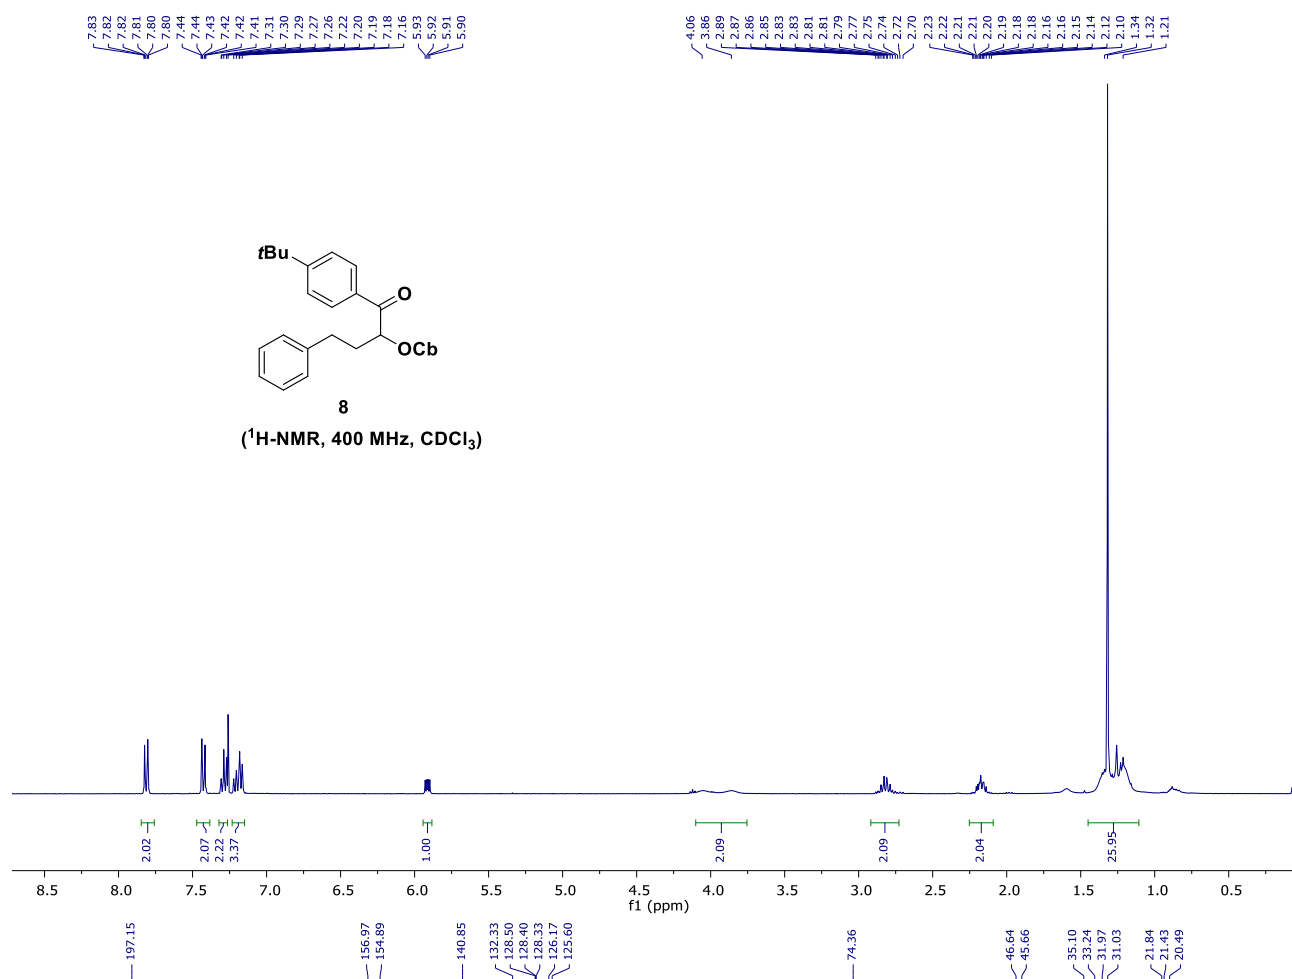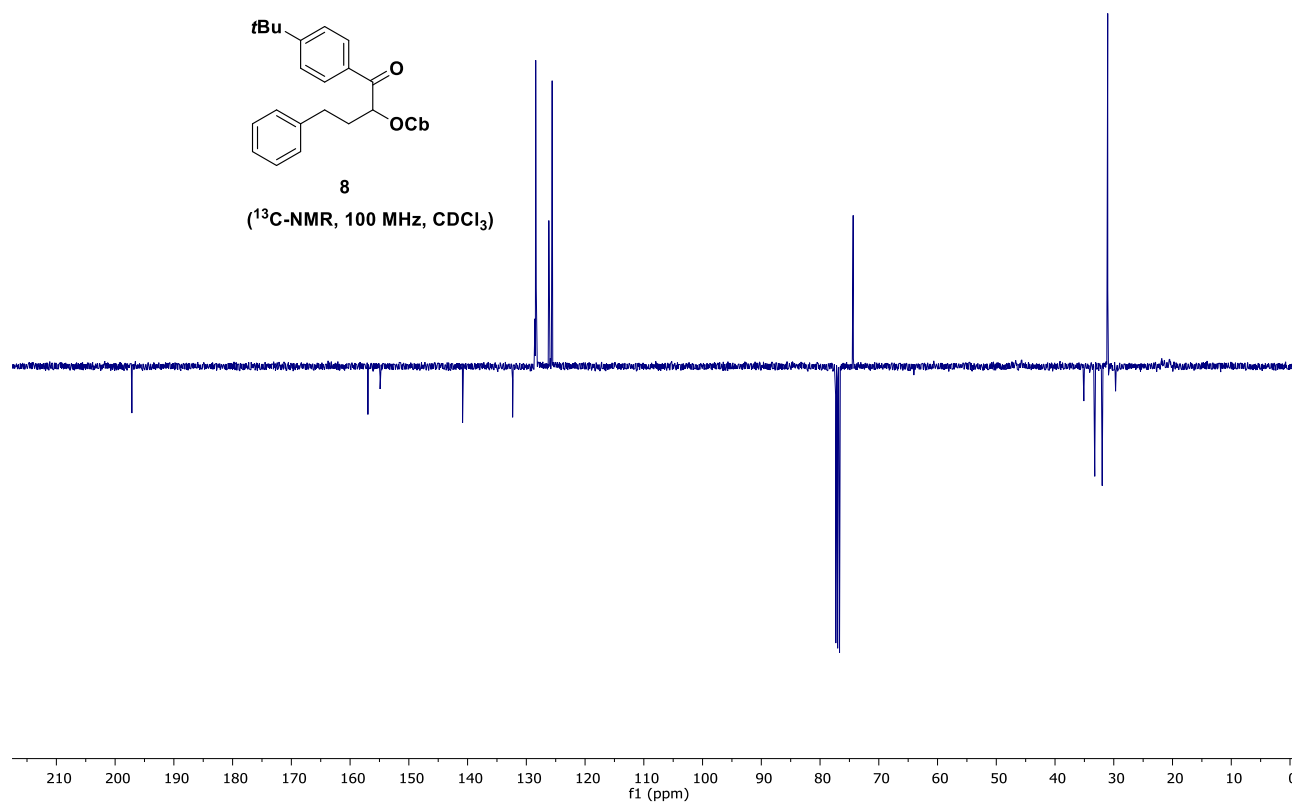

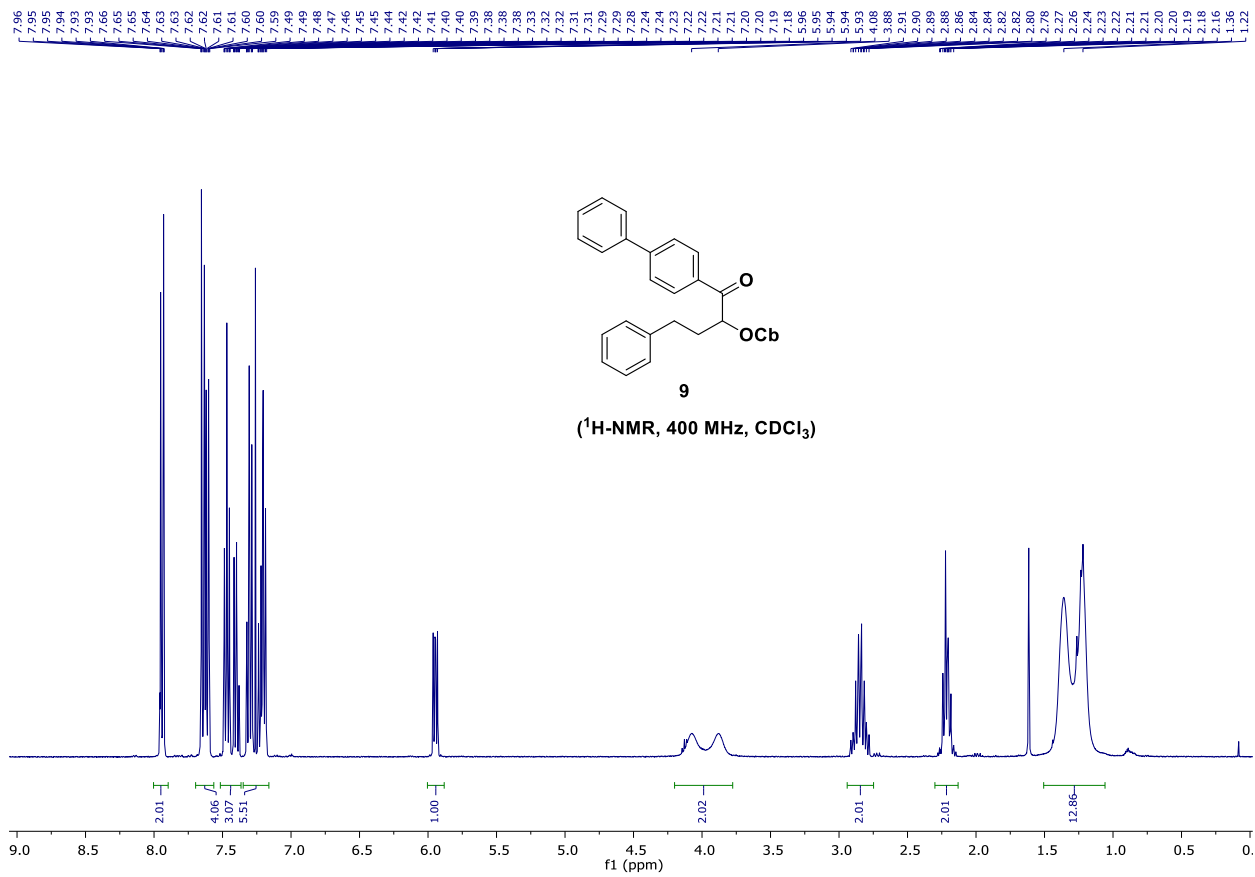

— 197.18

— 154.89

— 145.91

— 140.77

— 139.87

— 133.70

— 128.96

— 128.91

— 128.55

— 128.44

— 128.20

— 127.30

— 127.25

— 126.23

— 74.41

— 46.73

— 45.67

— 33.23

— 31.95

— 21.85

— 21.40

— 20.46

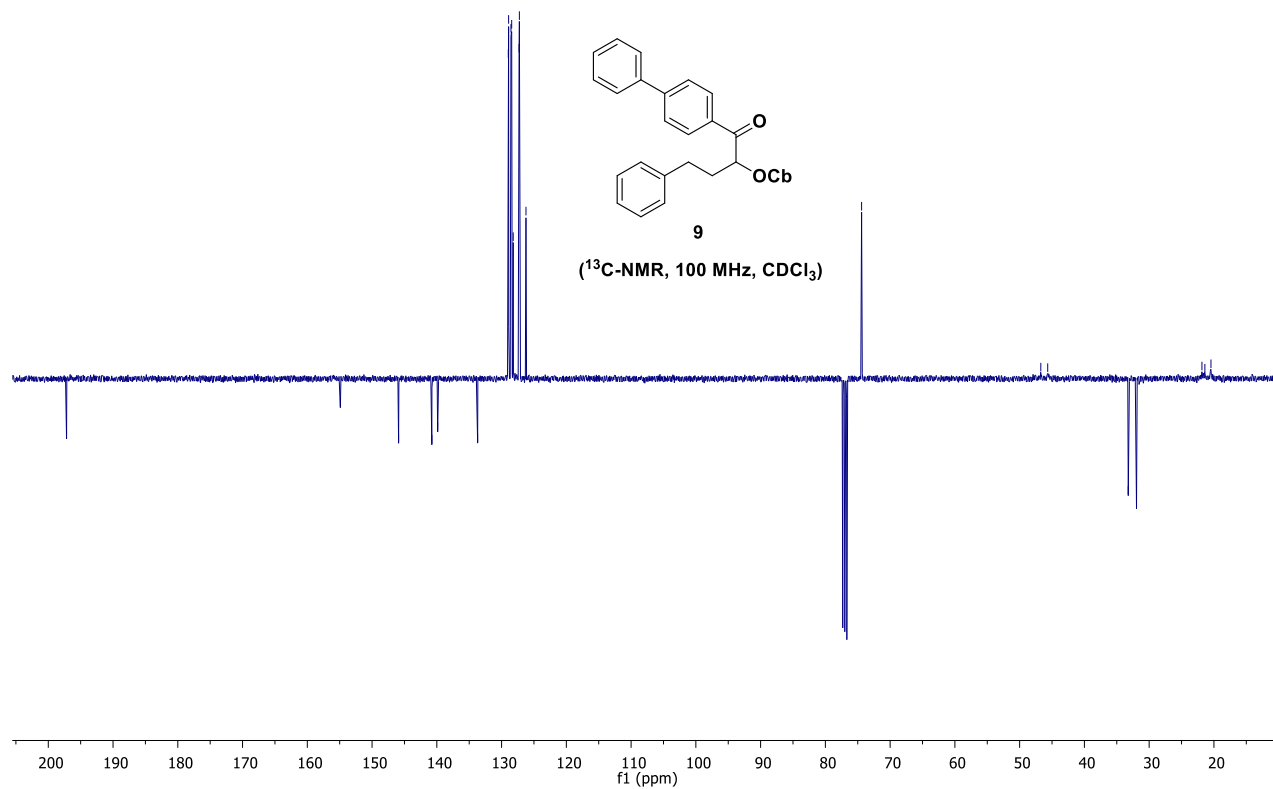



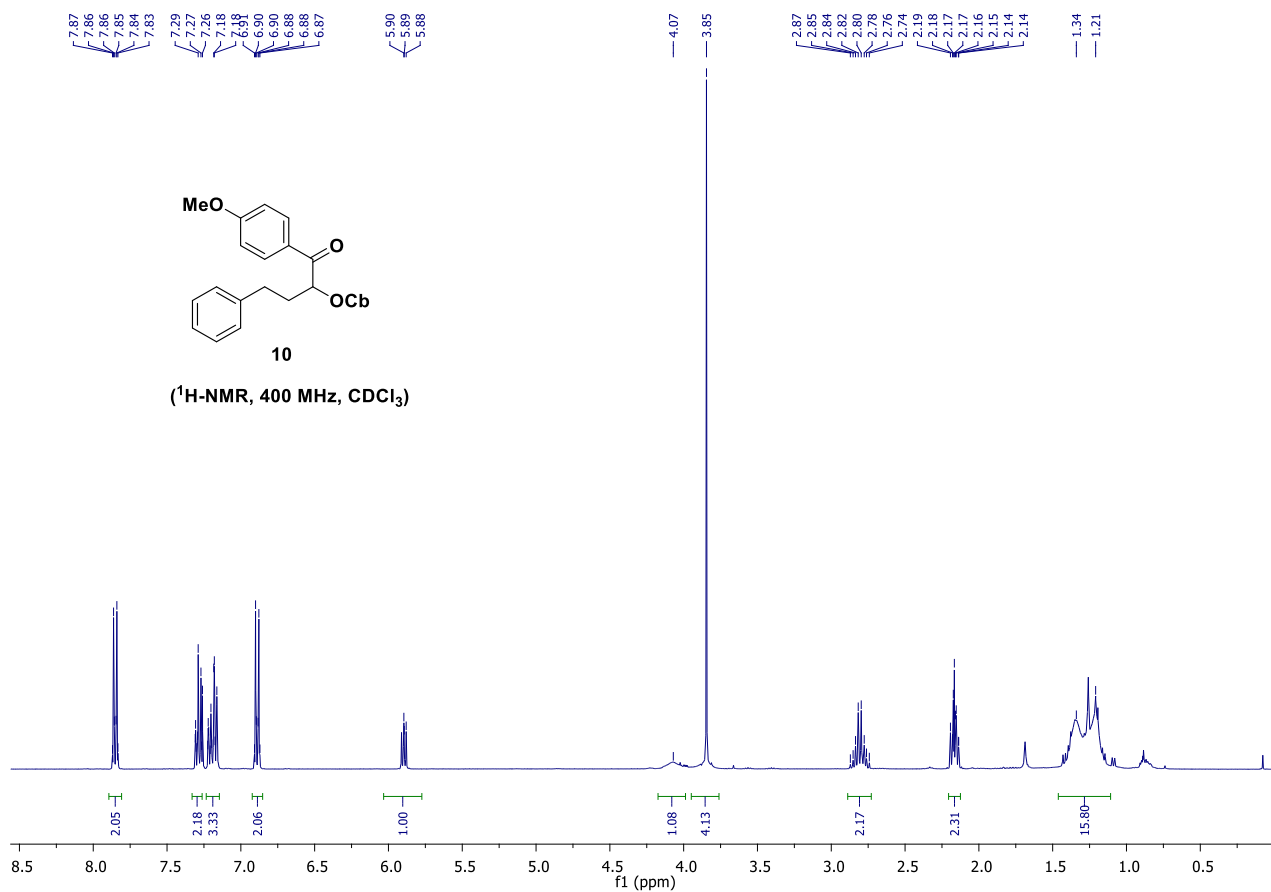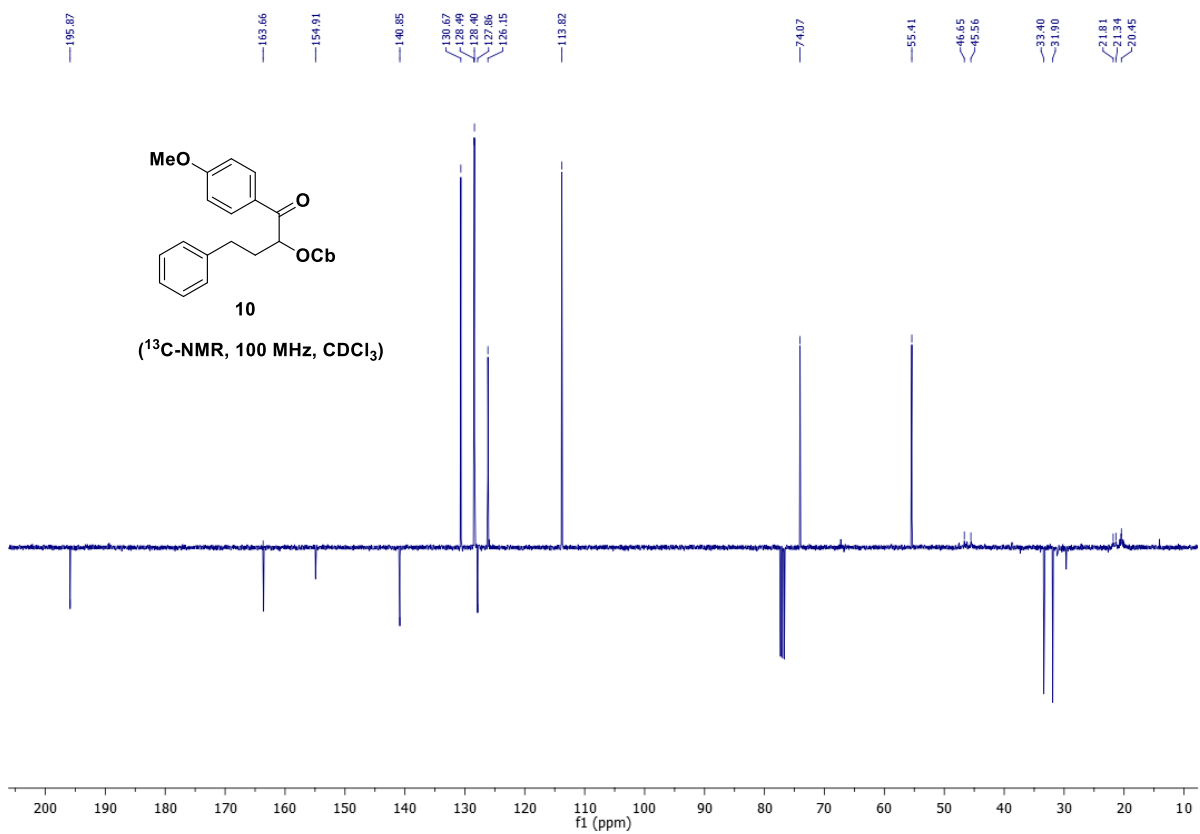

7.57, 7.57, 7.36, 7.36, 7.27, 7.26, 7.22, 7.20, 7.18, 7.17, 6.52, 6.51, 6.51, 5.71, 5.69, 5.67, 4.04, 3.87, 2.91, 2.89, 2.87, 2.87, 2.85, 2.82, 2.81, 2.80, 2.79, 2.78, 2.77, 2.75, 2.75, 2.26, 2.25, 2.23, 2.22, 2.21, 2.21, 2.20, 2.19, 2.19, 2.18, 2.17, 2.15, 1.33, 1.26, 1.24, 1.21

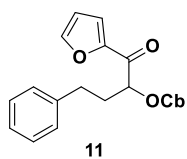

(<sup>1</sup>H-NMR, 400 MHz, CDCl<sub>3</sub>)

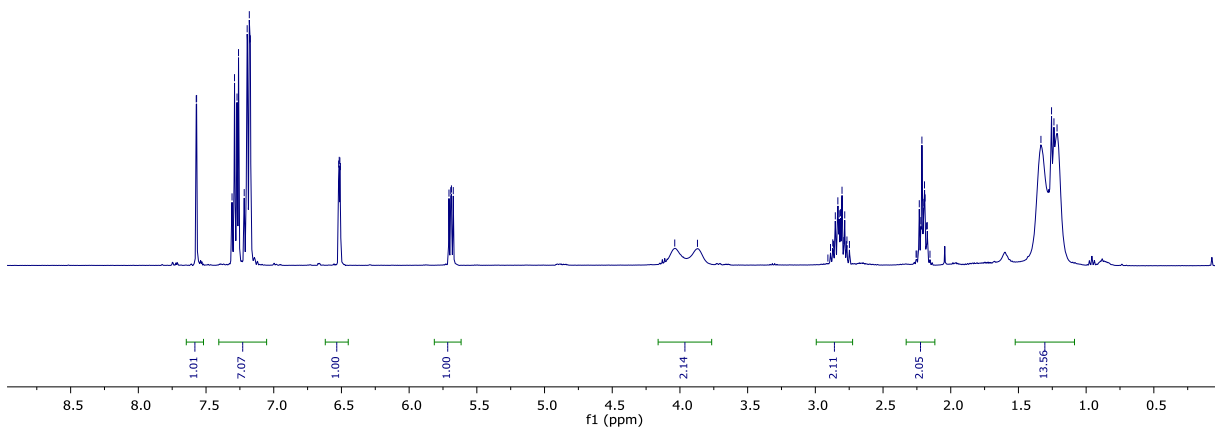

186.08, 154.72, 150.83, 146.59, 140.84, 128.49, 128.35, 128.16, 118.13, 112.25, 74.67, 46.69, 45.63, 33.10, 31.85, 21.82, 21.37, 20.41

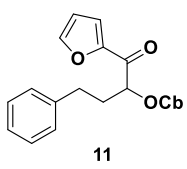

(<sup>13</sup>C-NMR, 100 MHz, CDCl<sub>3</sub>)

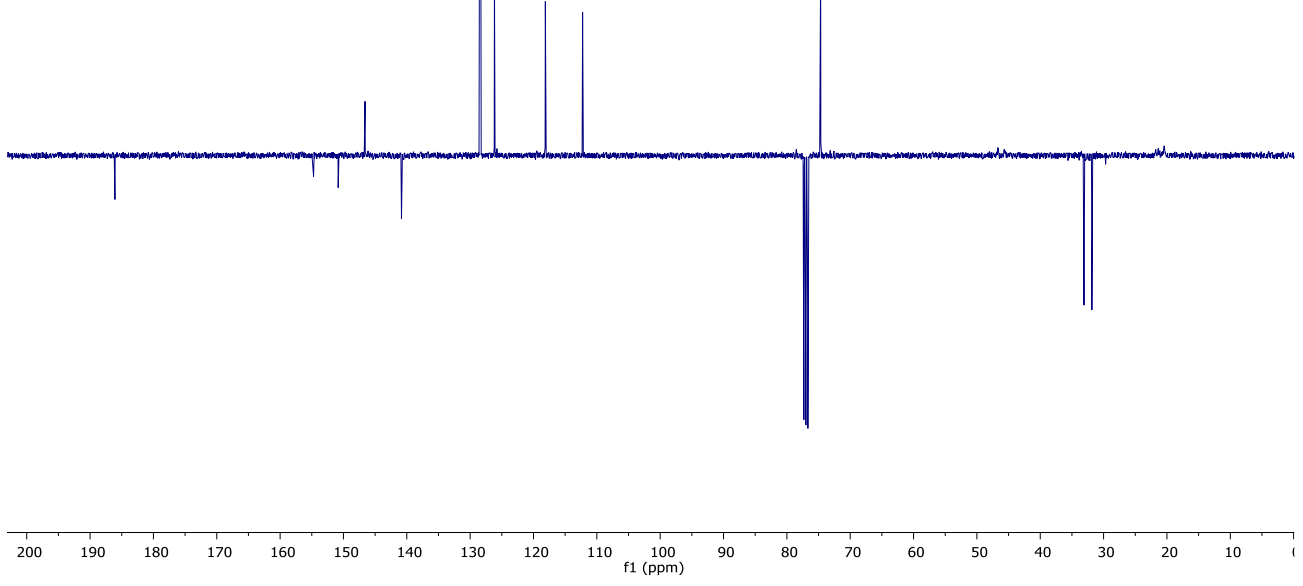

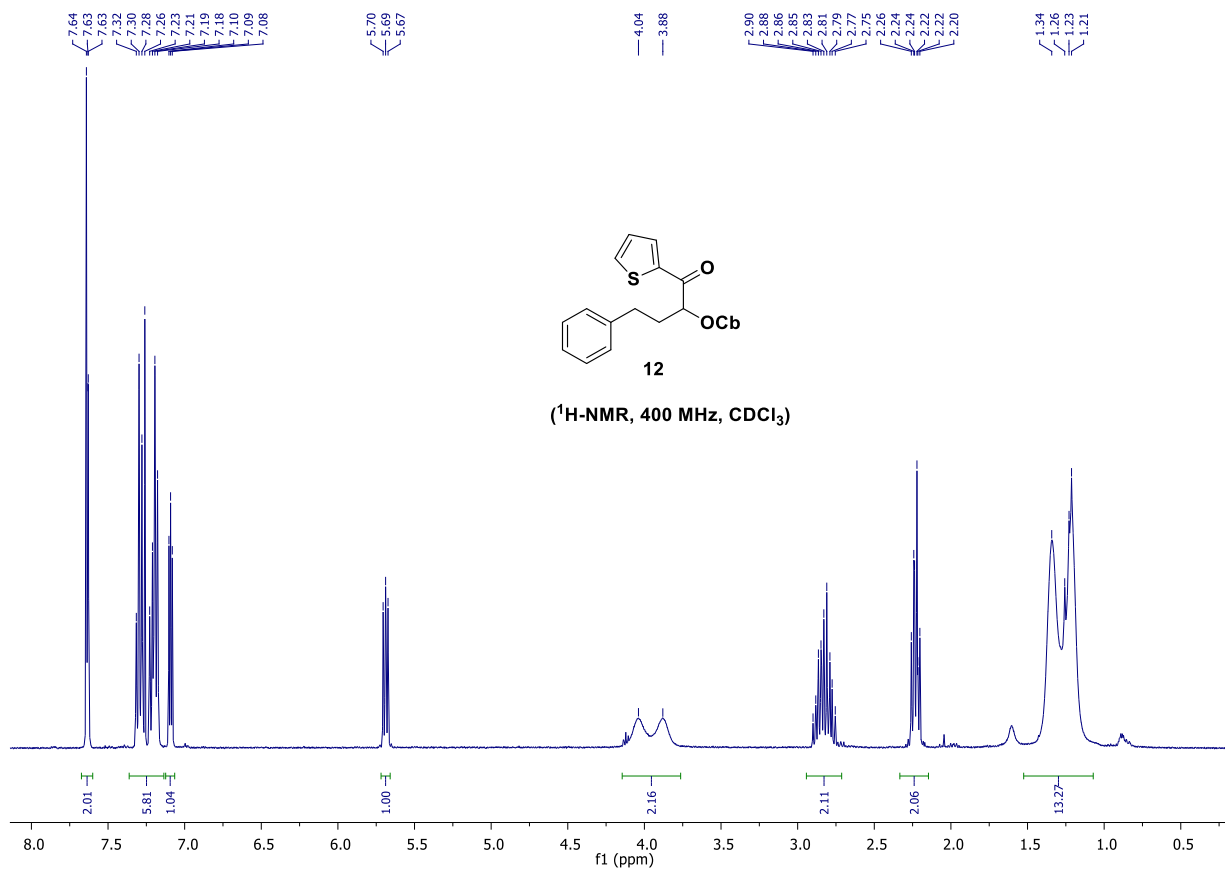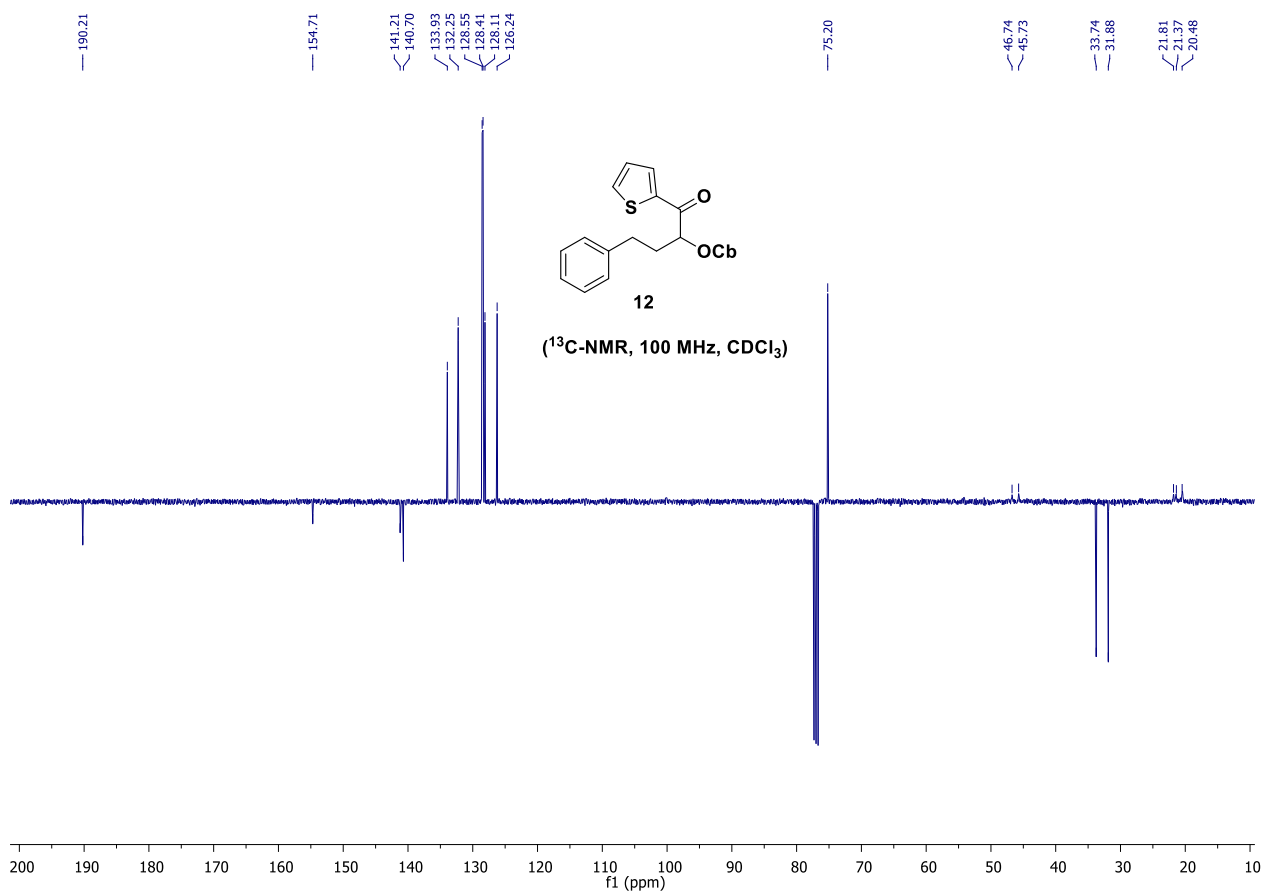

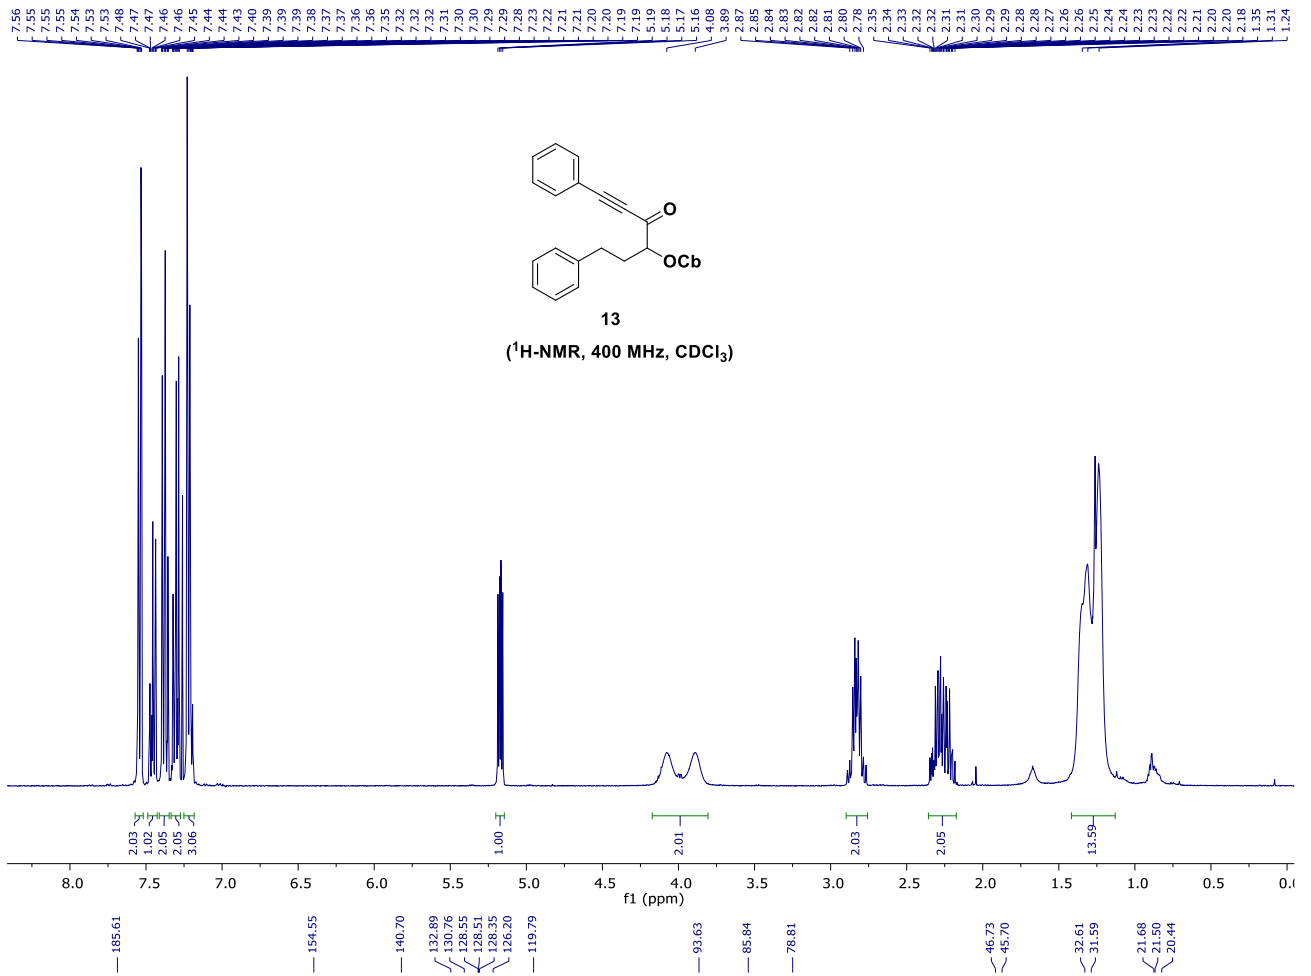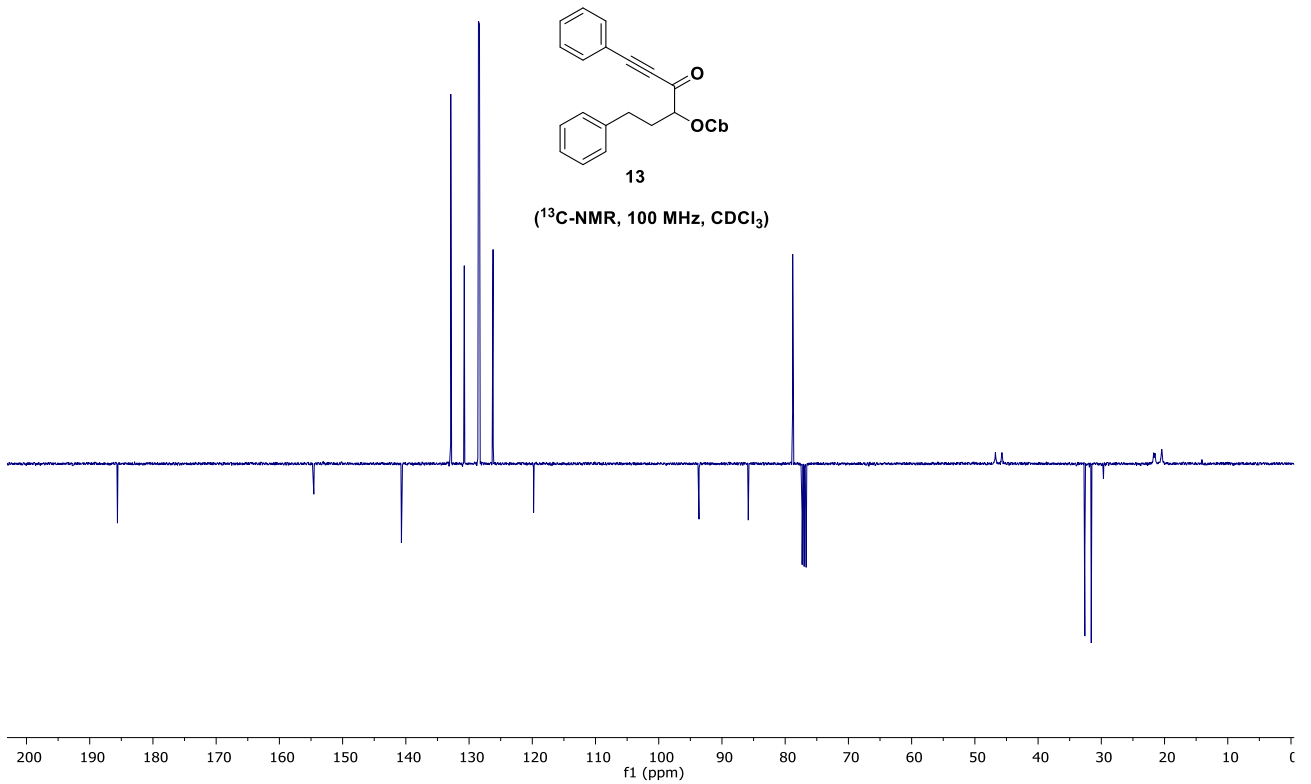

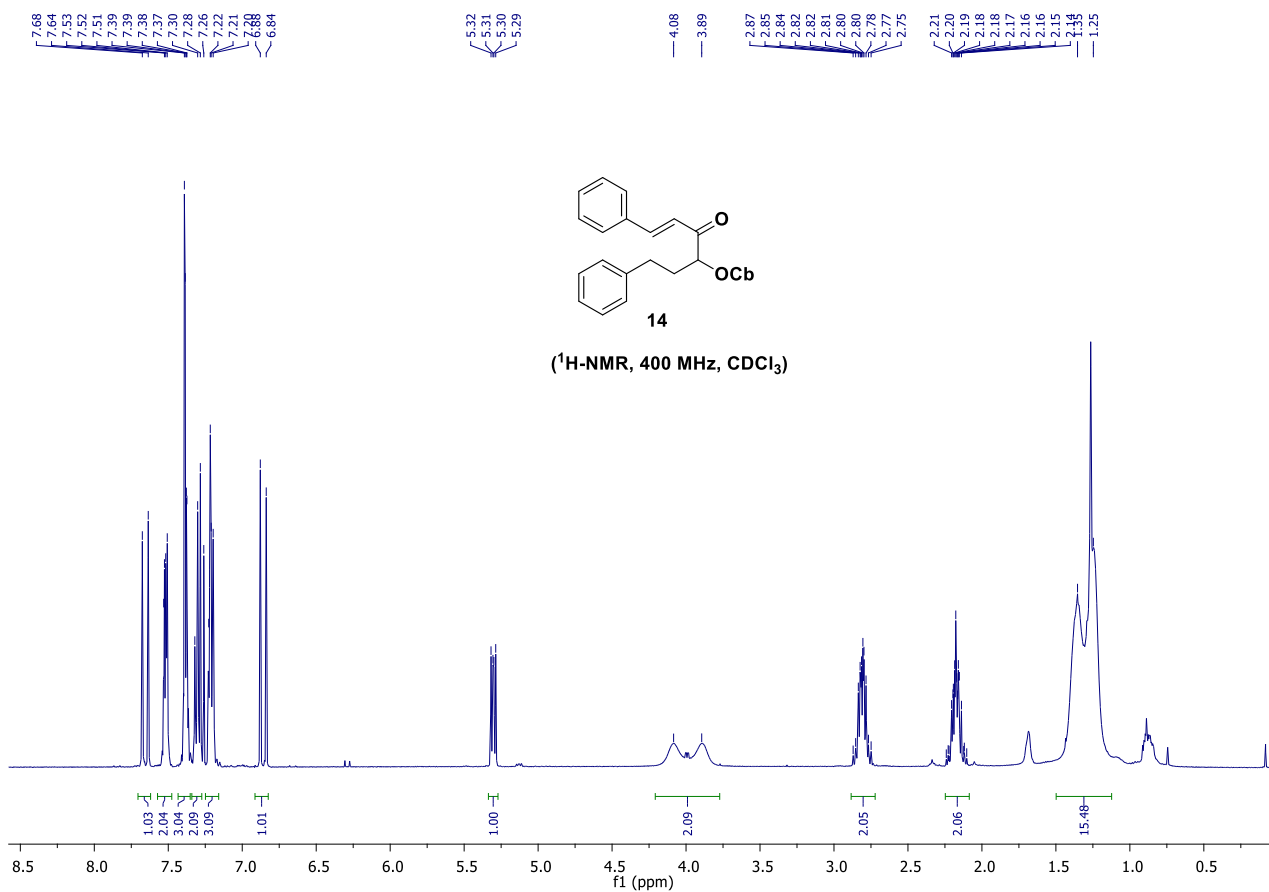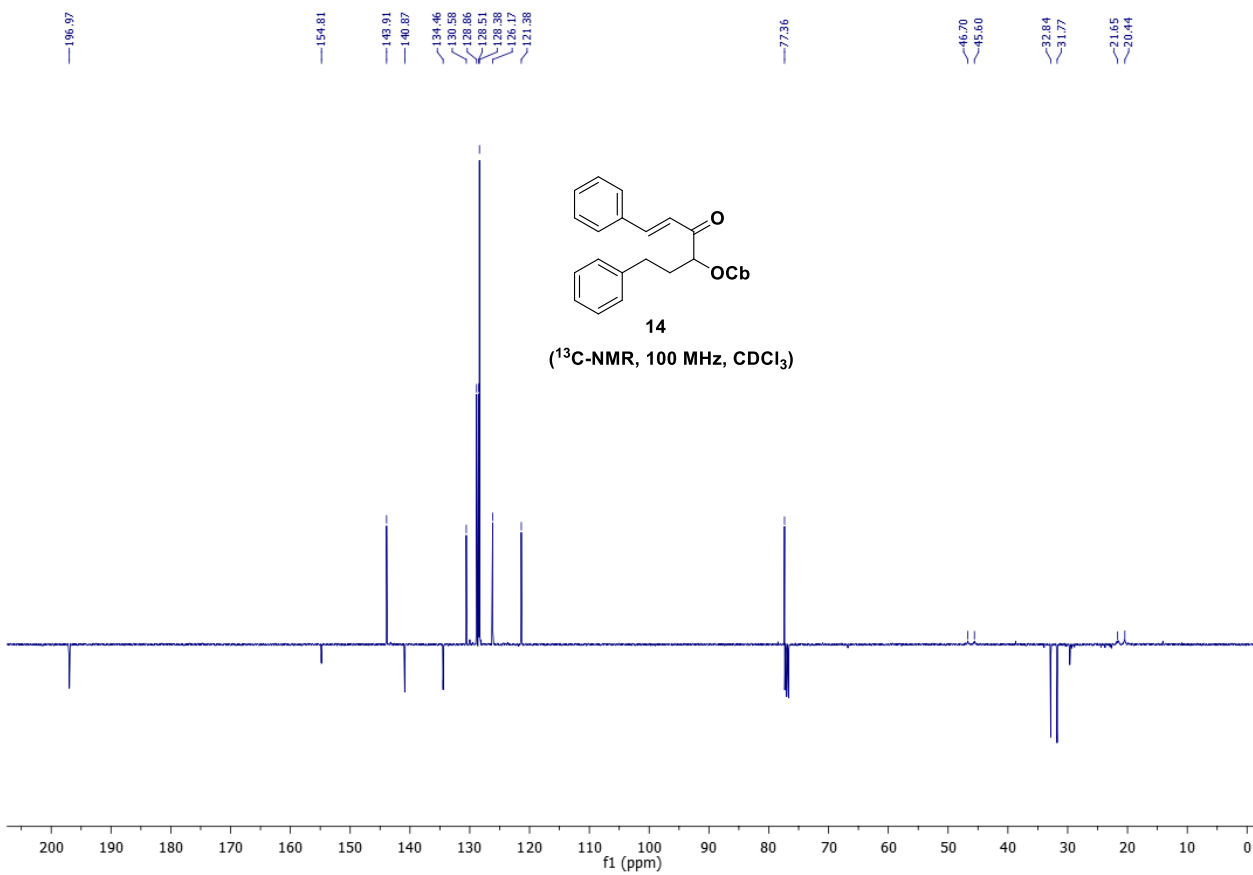

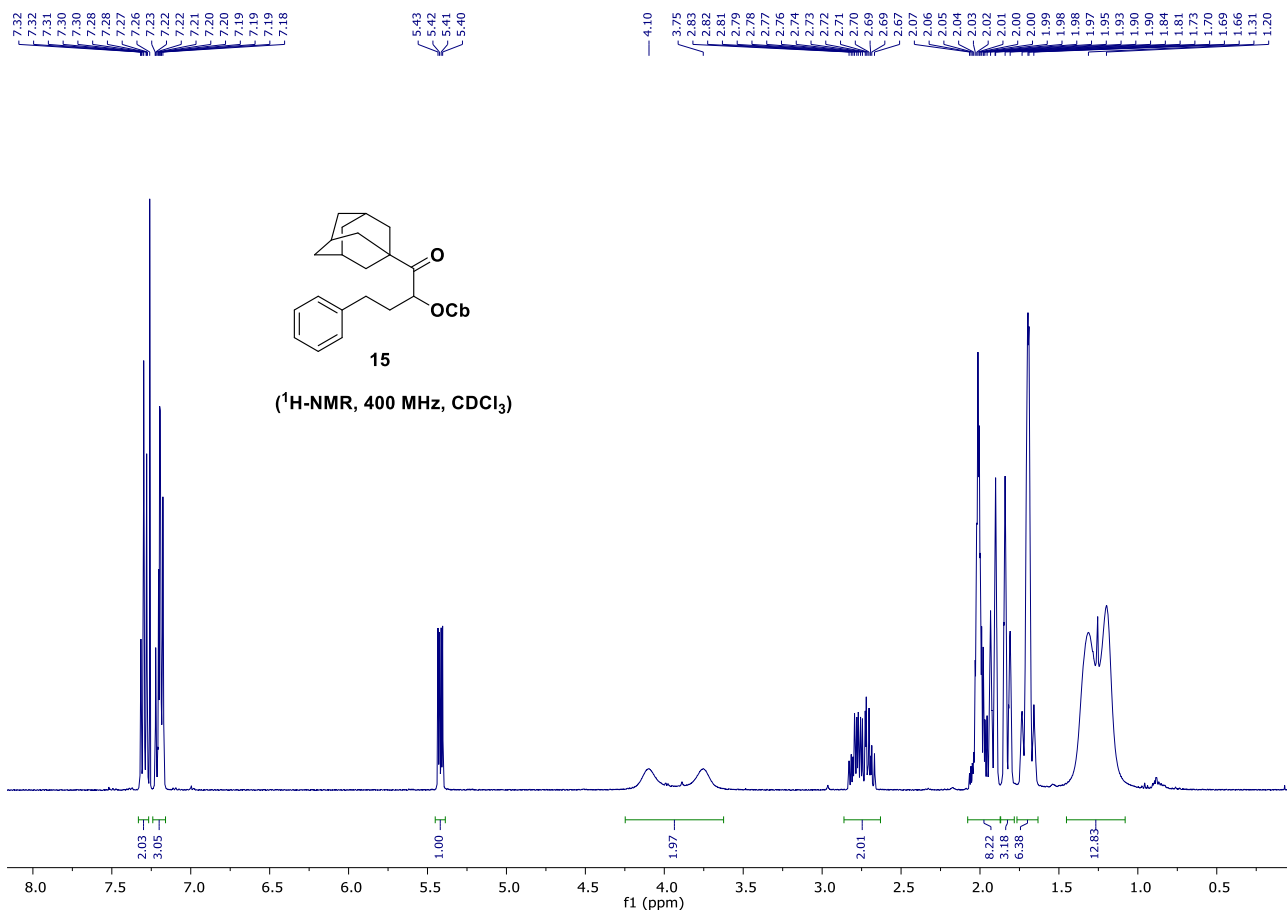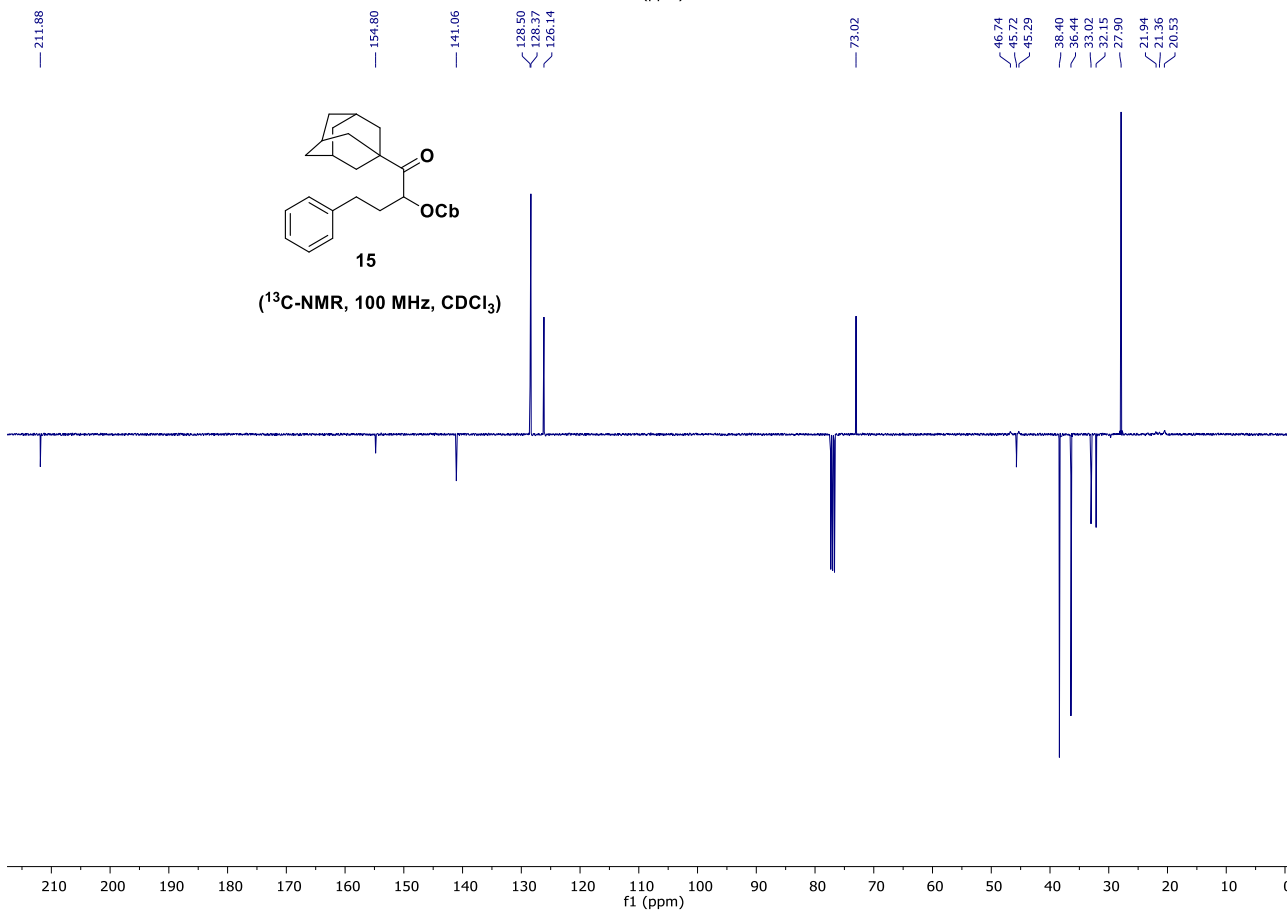

7.32  
7.31  
7.30  
7.28  
7.26  
7.22  
7.21  
7.20  
7.19  
5.20  
5.18  
5.17  
4.07  
3.86  
2.81  
2.79  
2.77  
2.75  
2.73  
2.24  
2.23  
2.22  
2.21  
2.21  
2.21  
2.20  
2.20  
2.19  
2.18  
2.18  
2.17  
2.16  
2.16  
2.15  
2.14  
2.13  
2.12  
2.11  
2.10  
2.09  
2.07  
2.03  
2.02  
2.01  
2.01  
2.00  
1.99  
1.98  
1.97  
1.40  
1.18  
1.15  
1.14  
1.11  
1.10  
1.09  
1.08  
1.06  
1.05  
1.04  
1.03  
1.02  
1.01  
1.00  
0.98  
0.95  
0.91  
0.90  
0.89  
0.88  
0.87

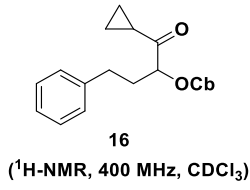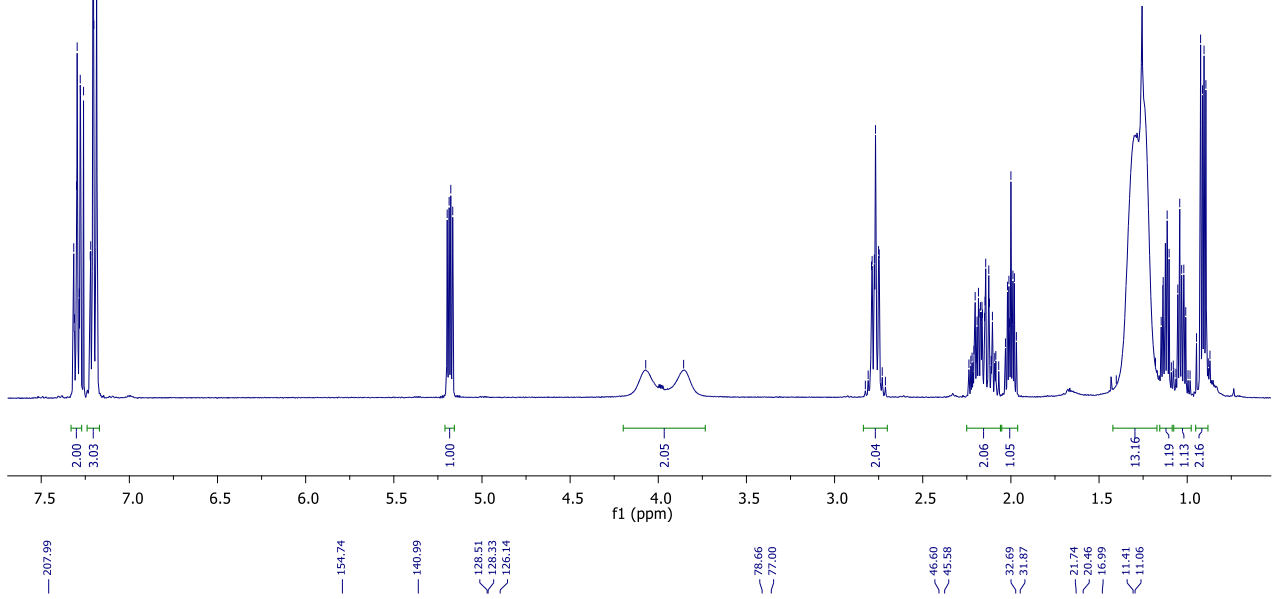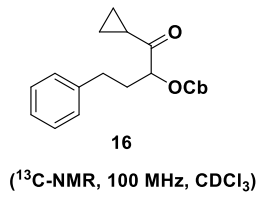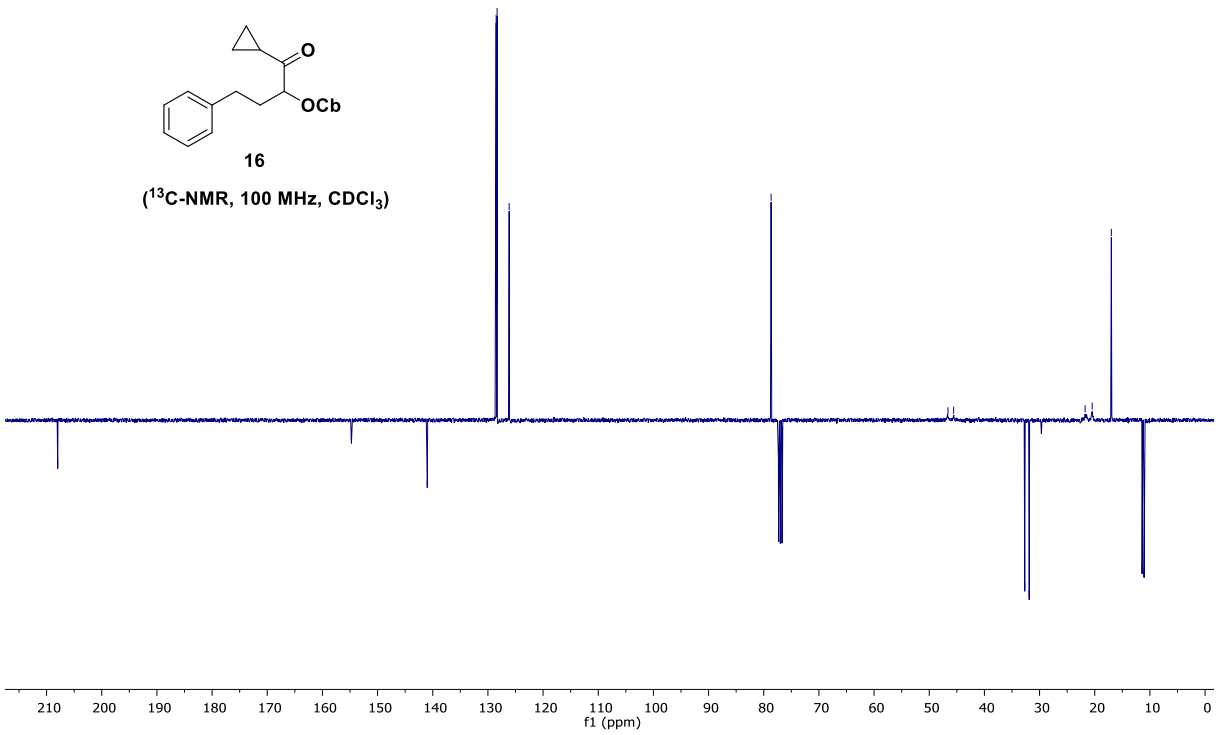

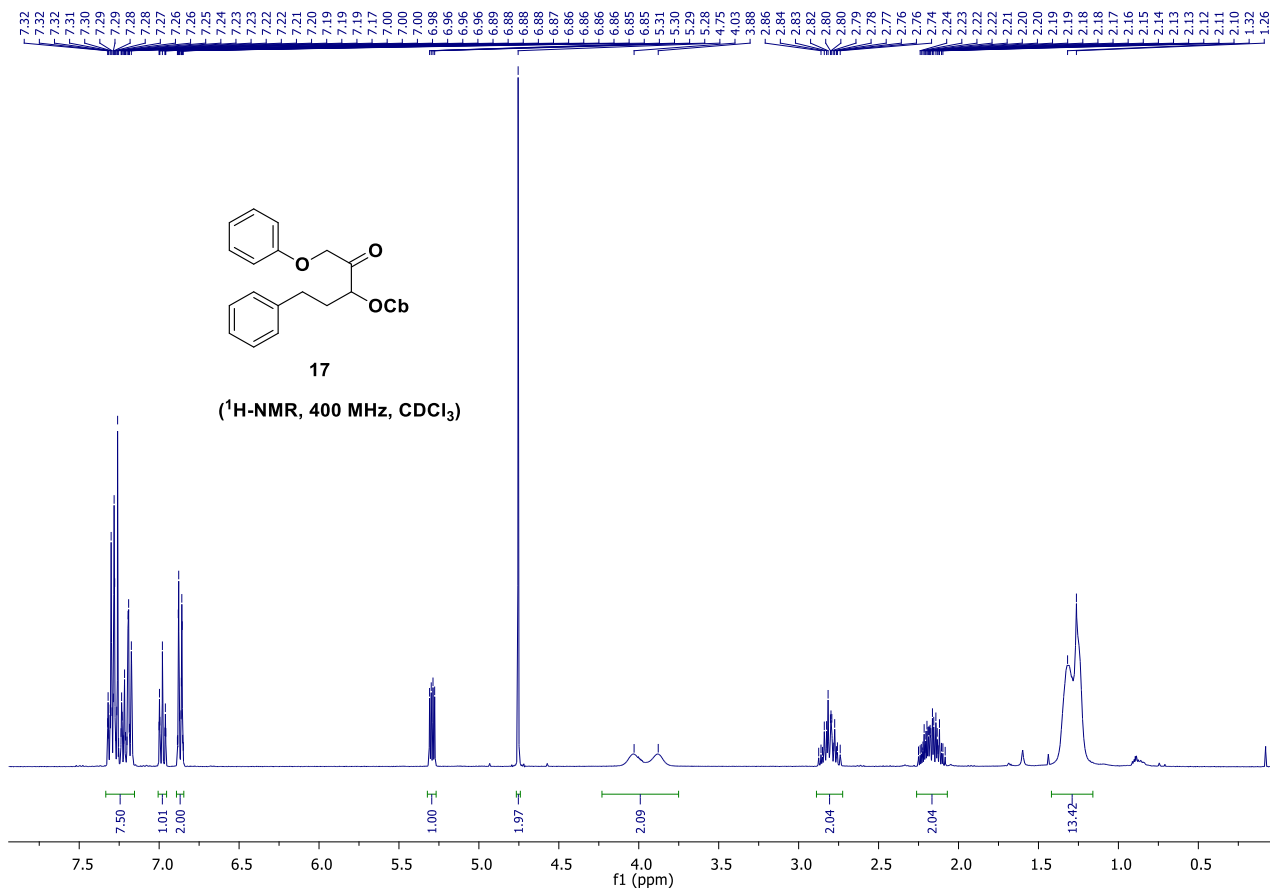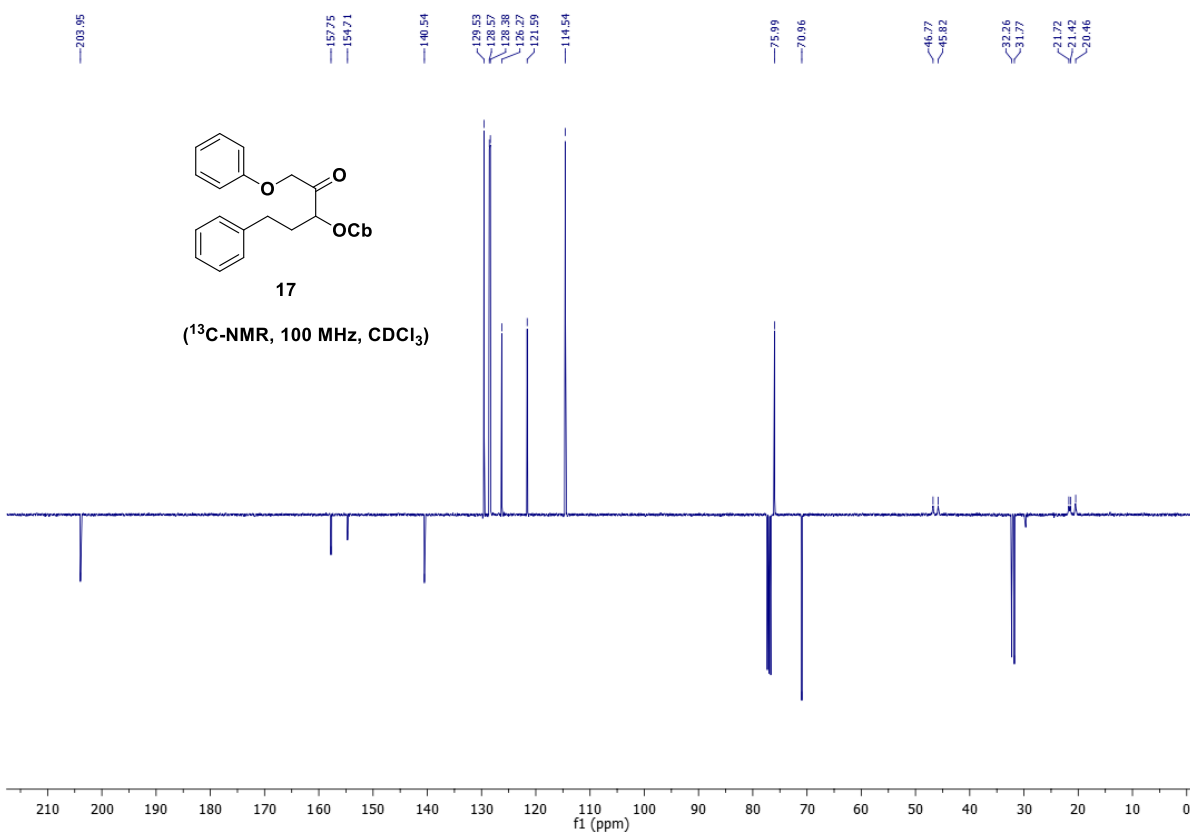



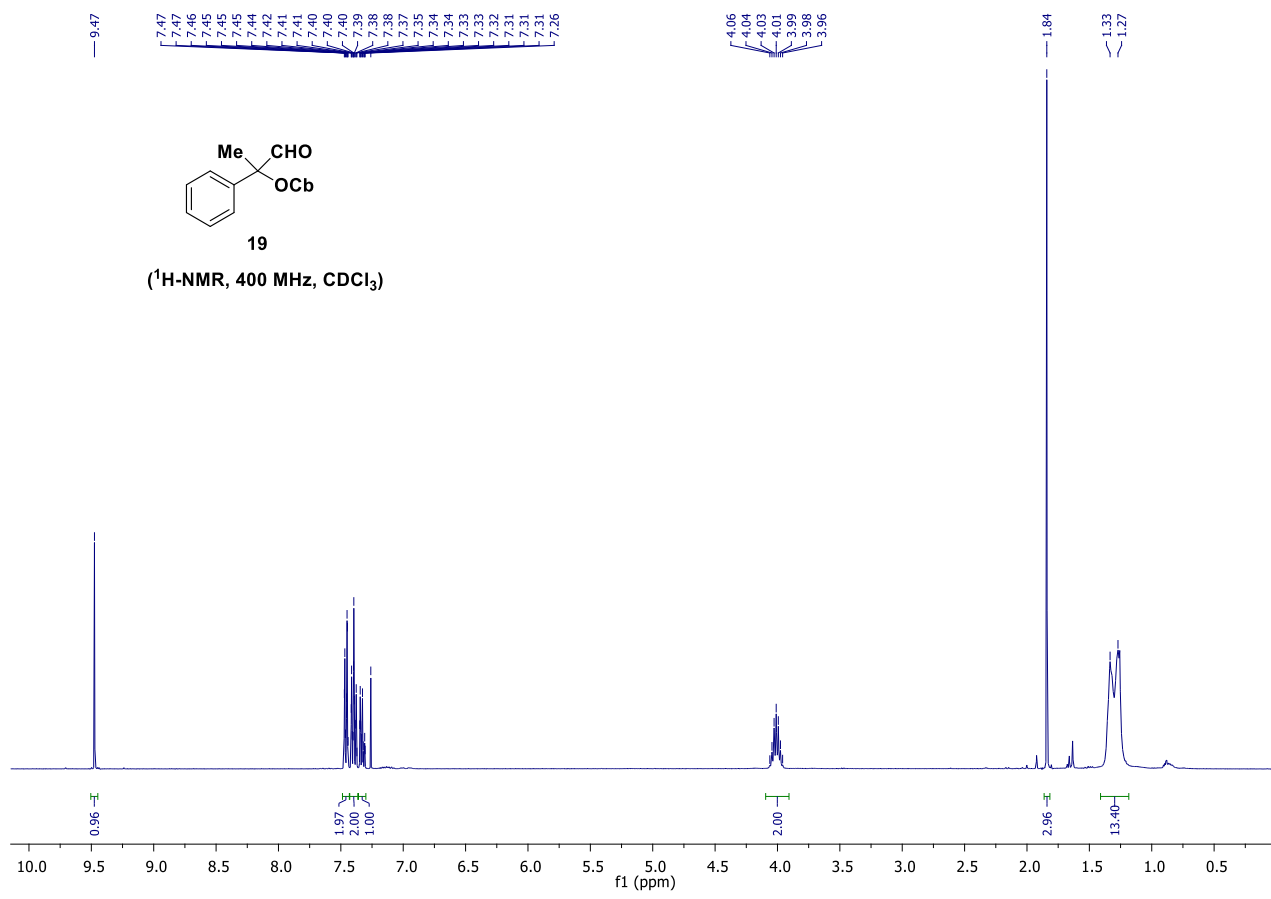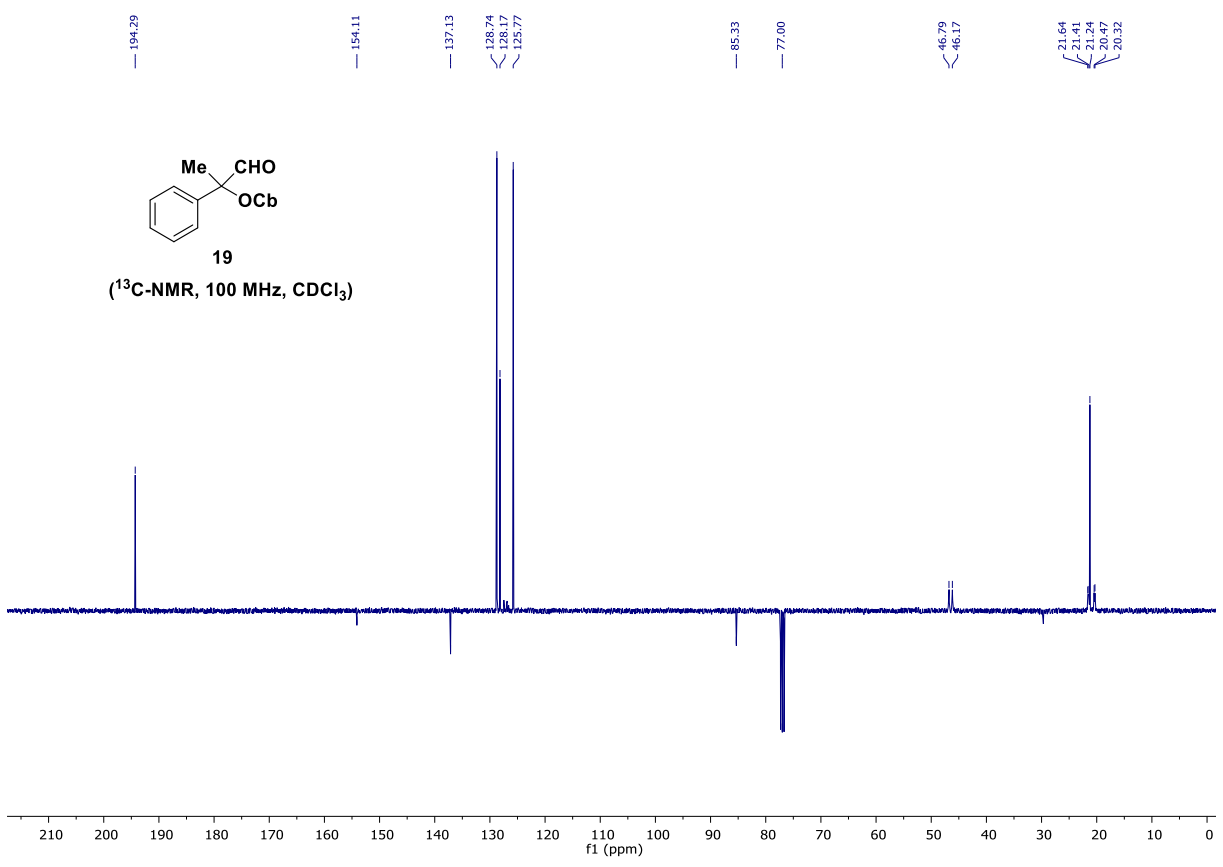

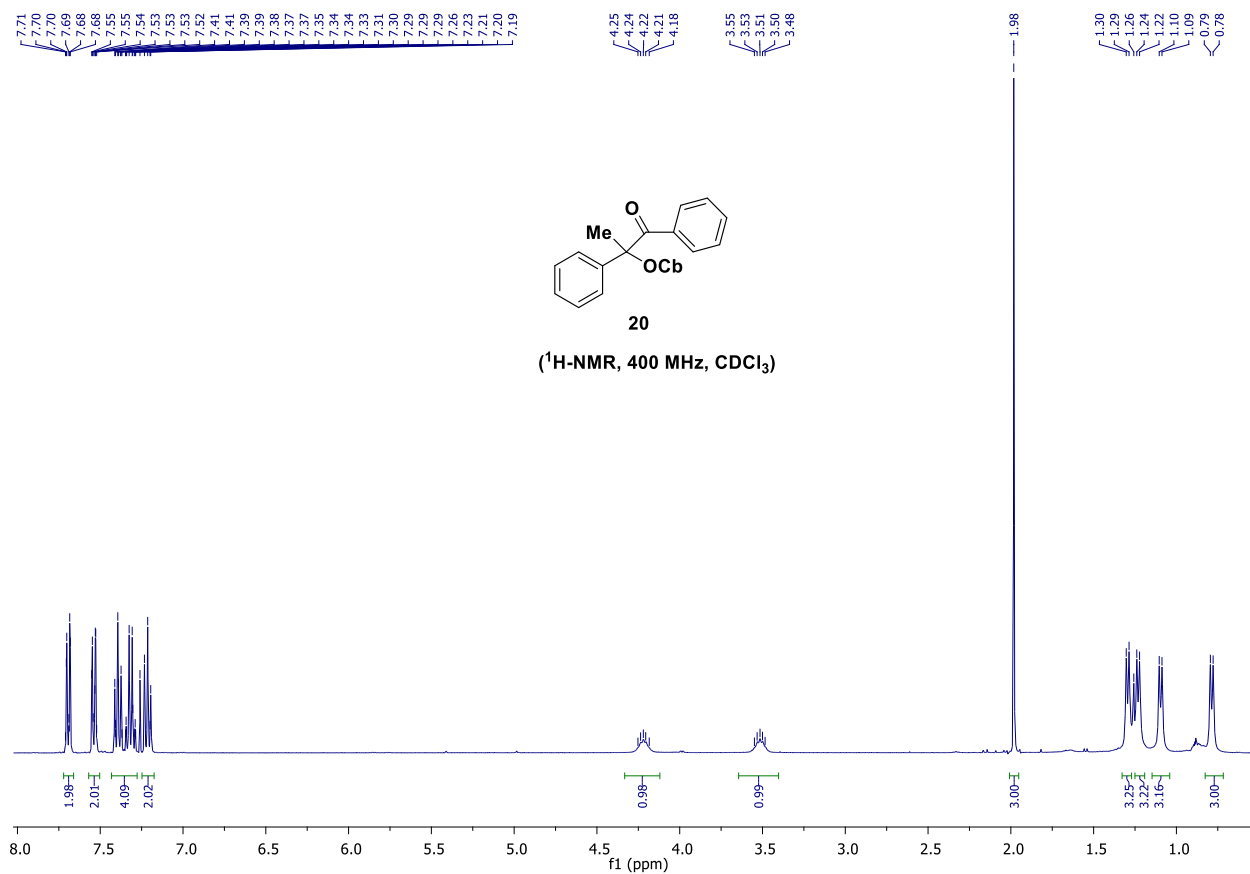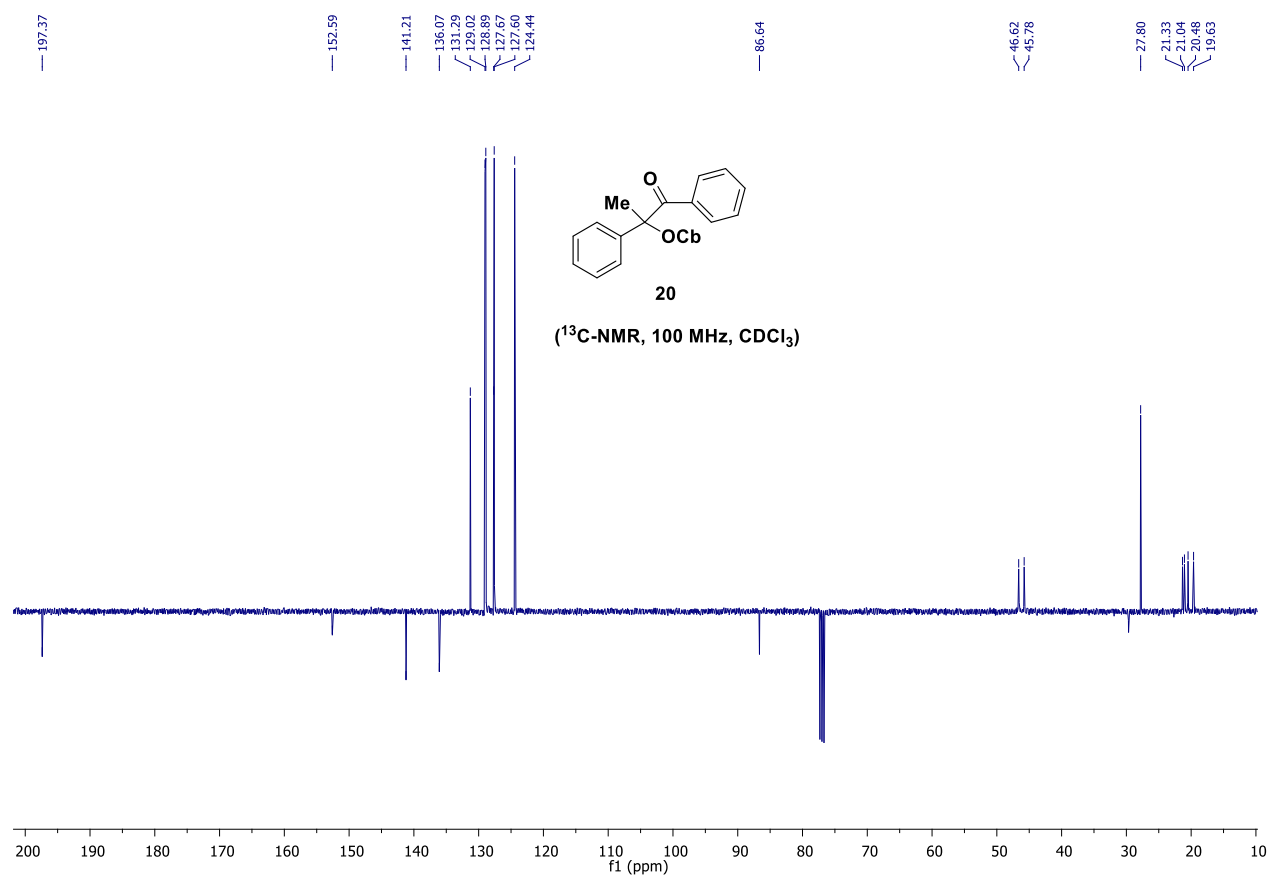

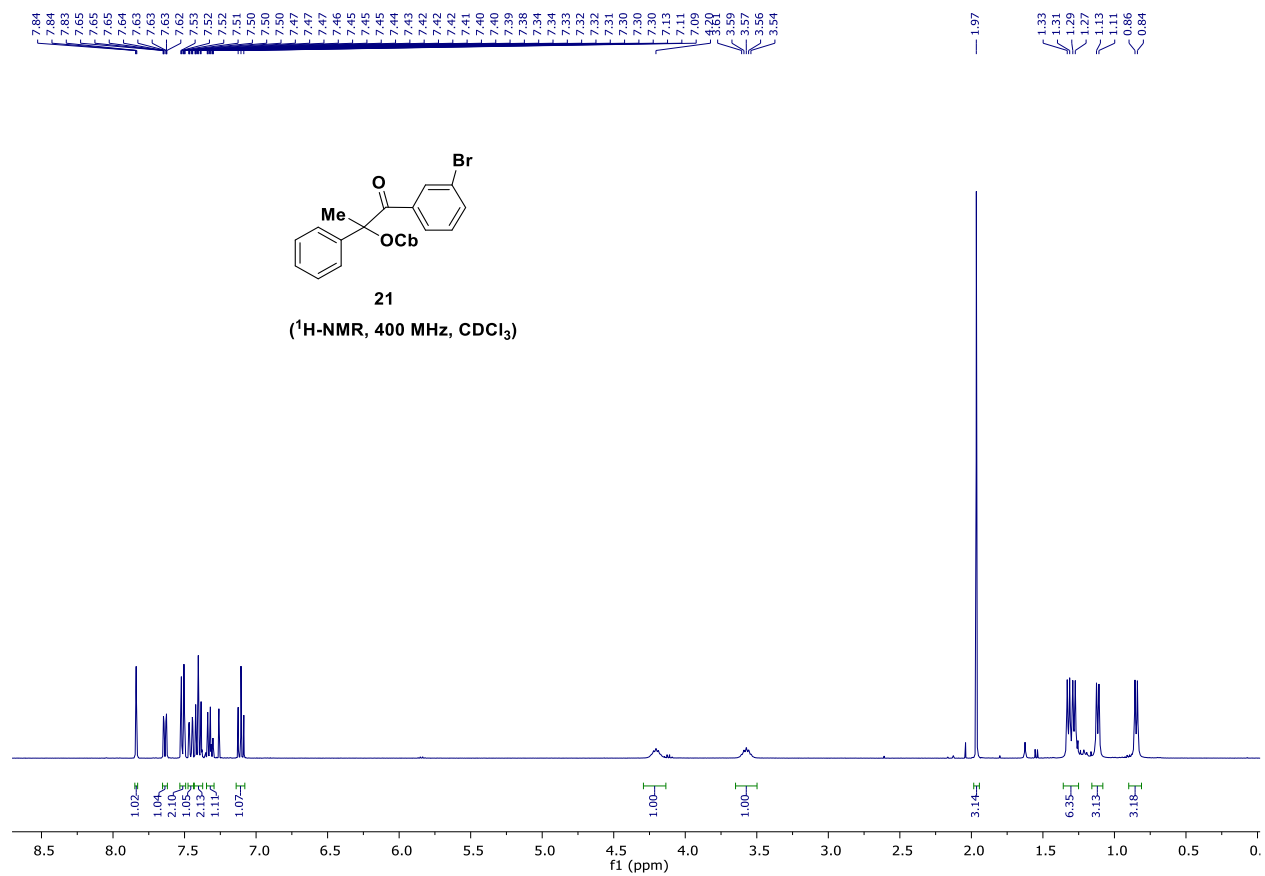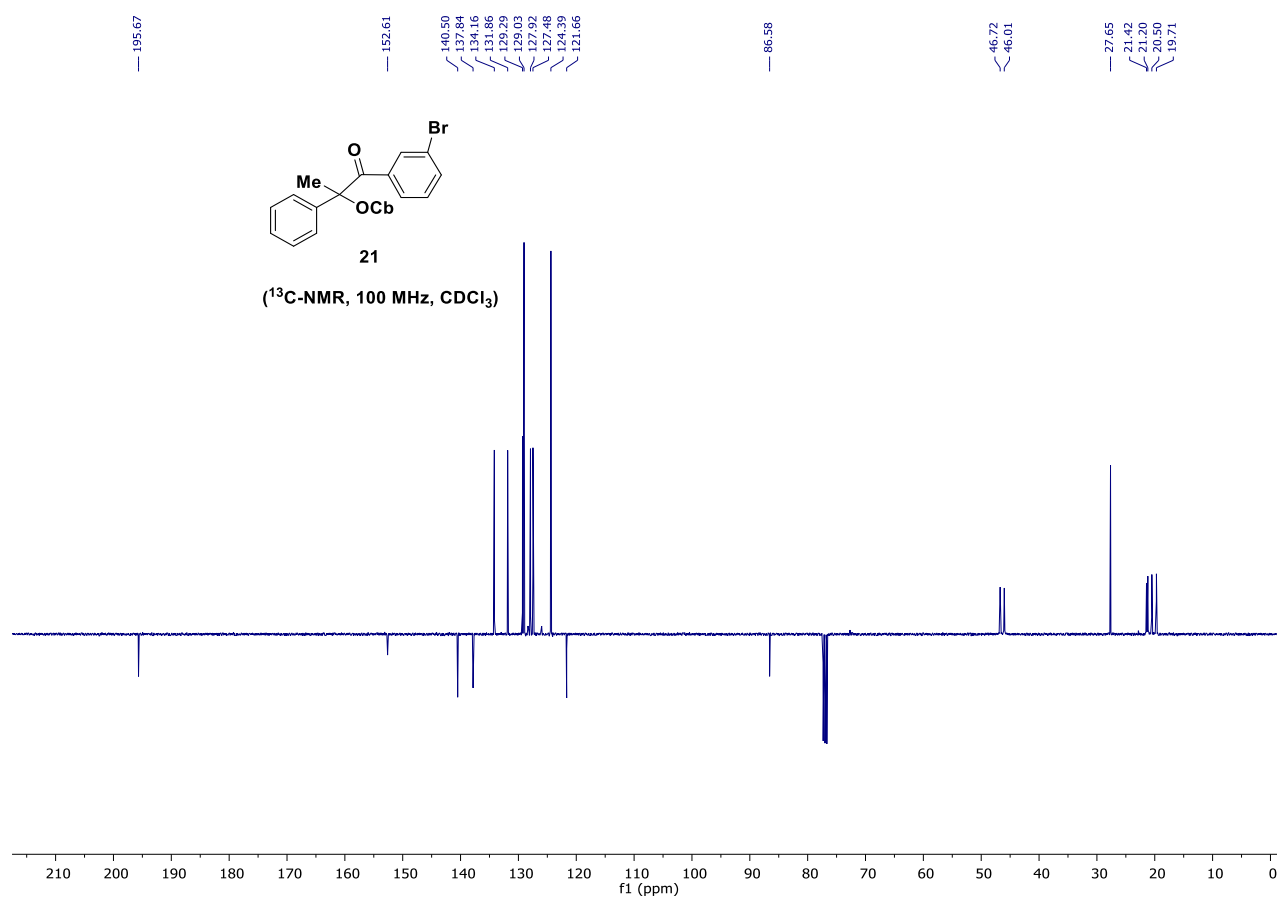

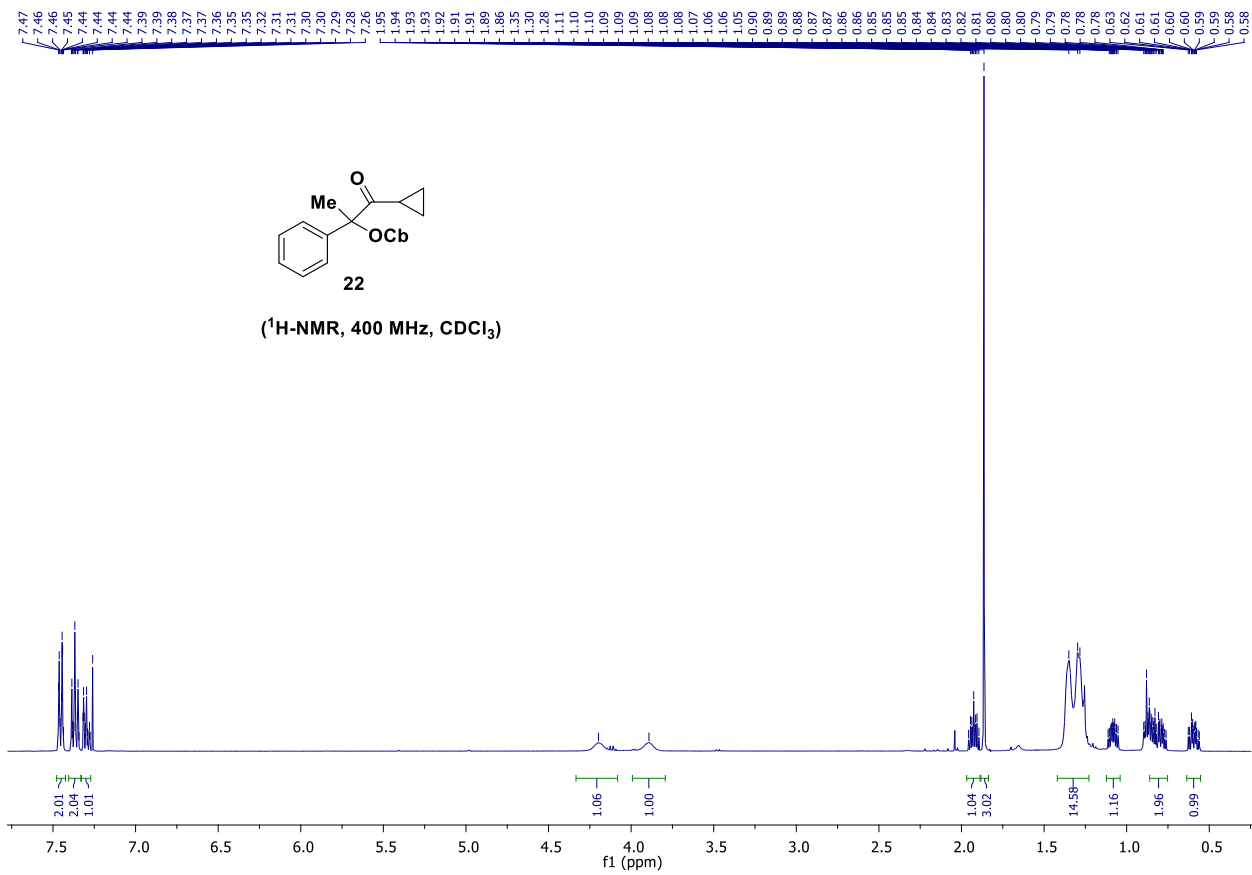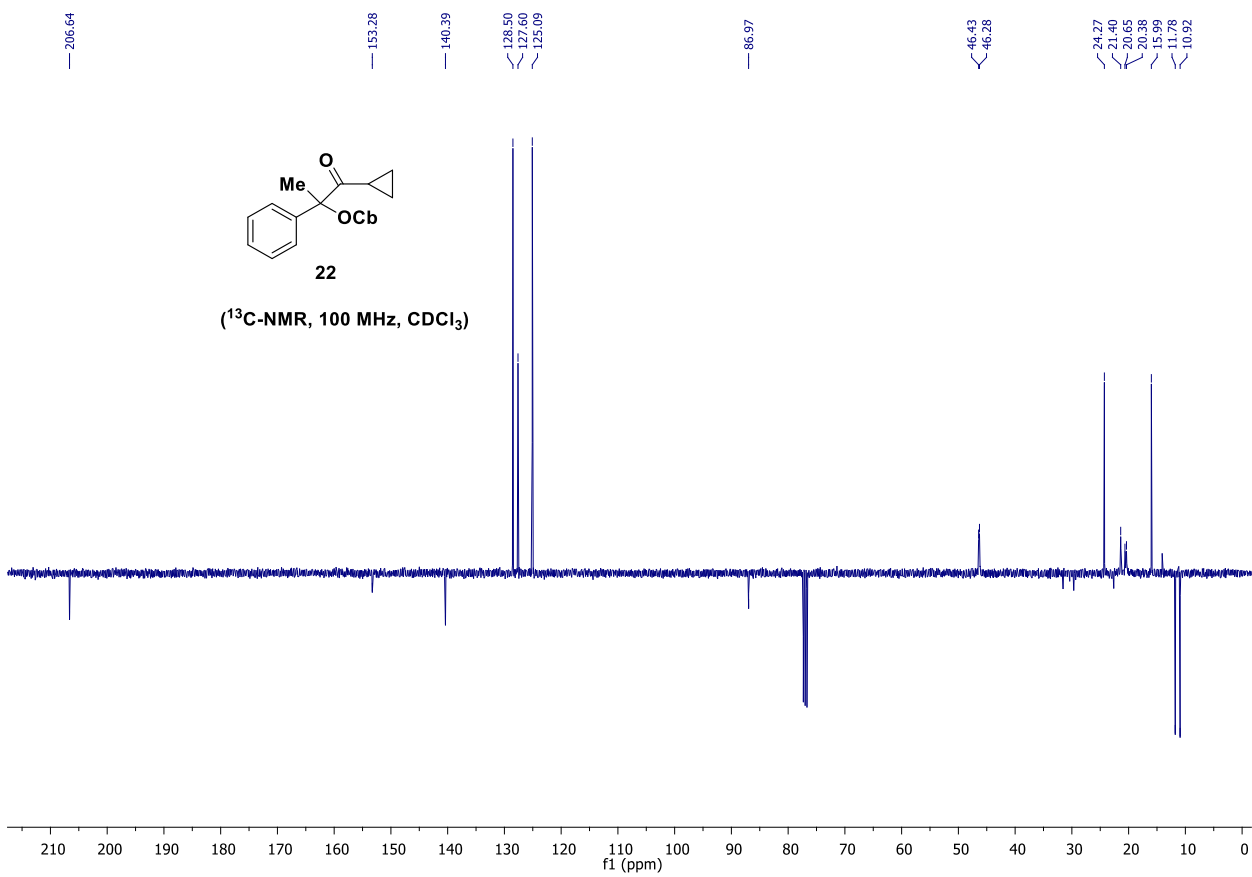

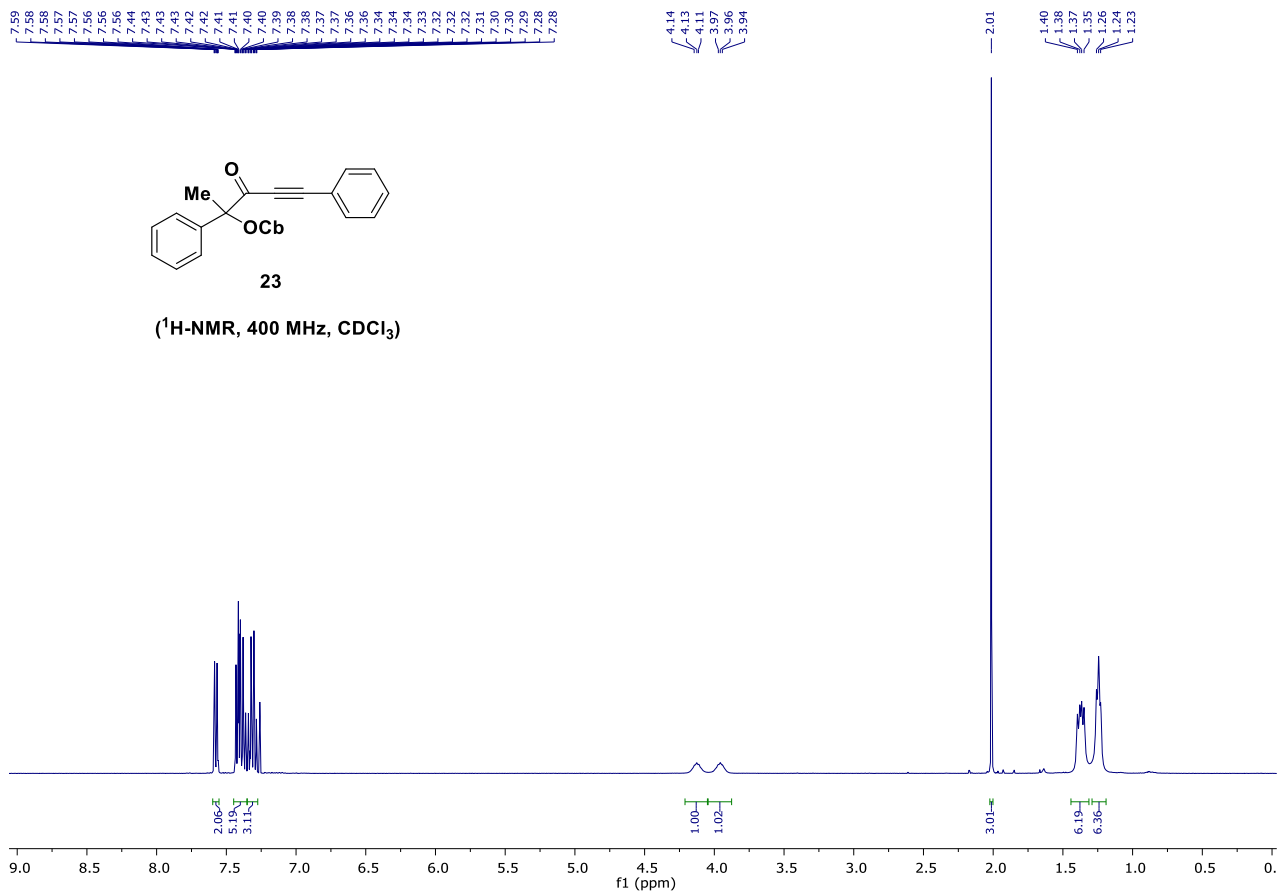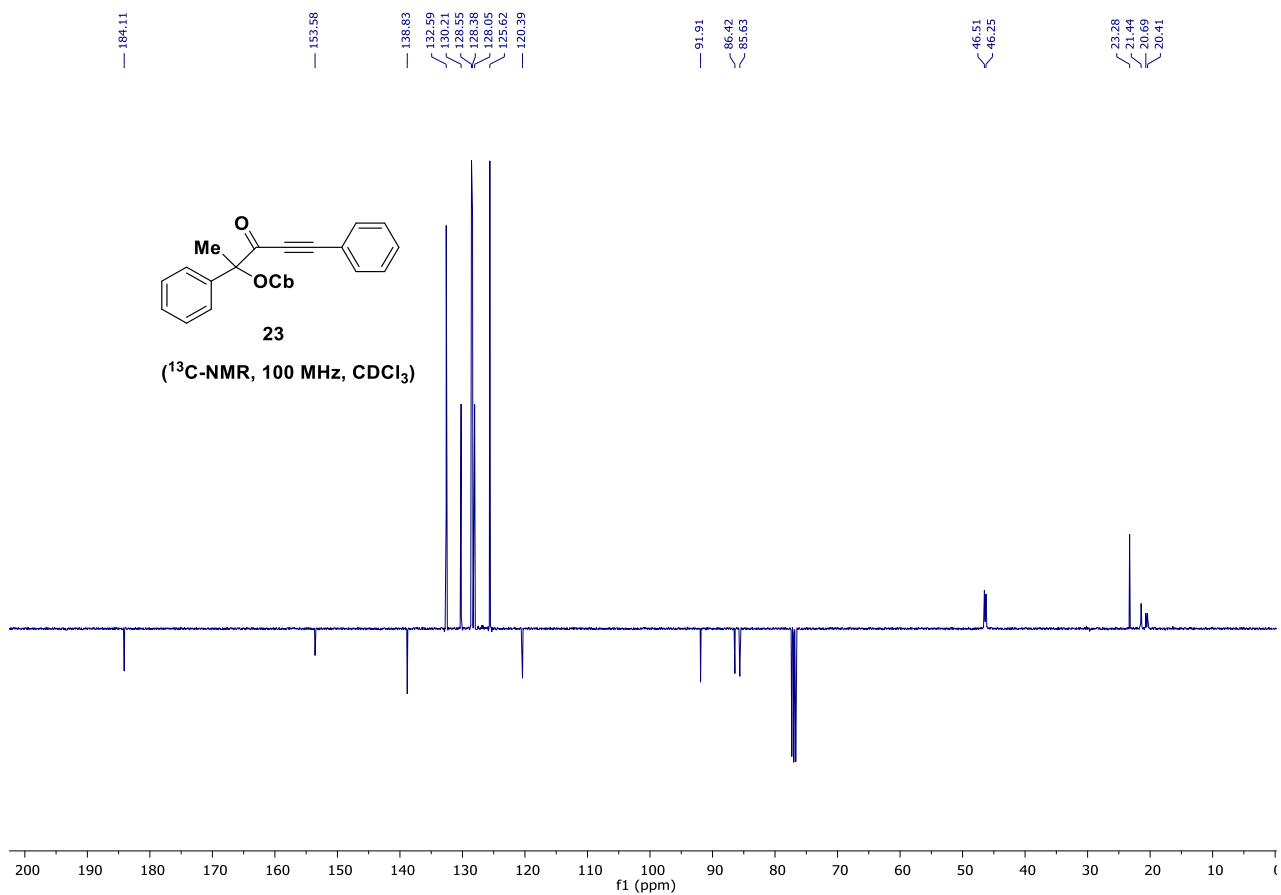

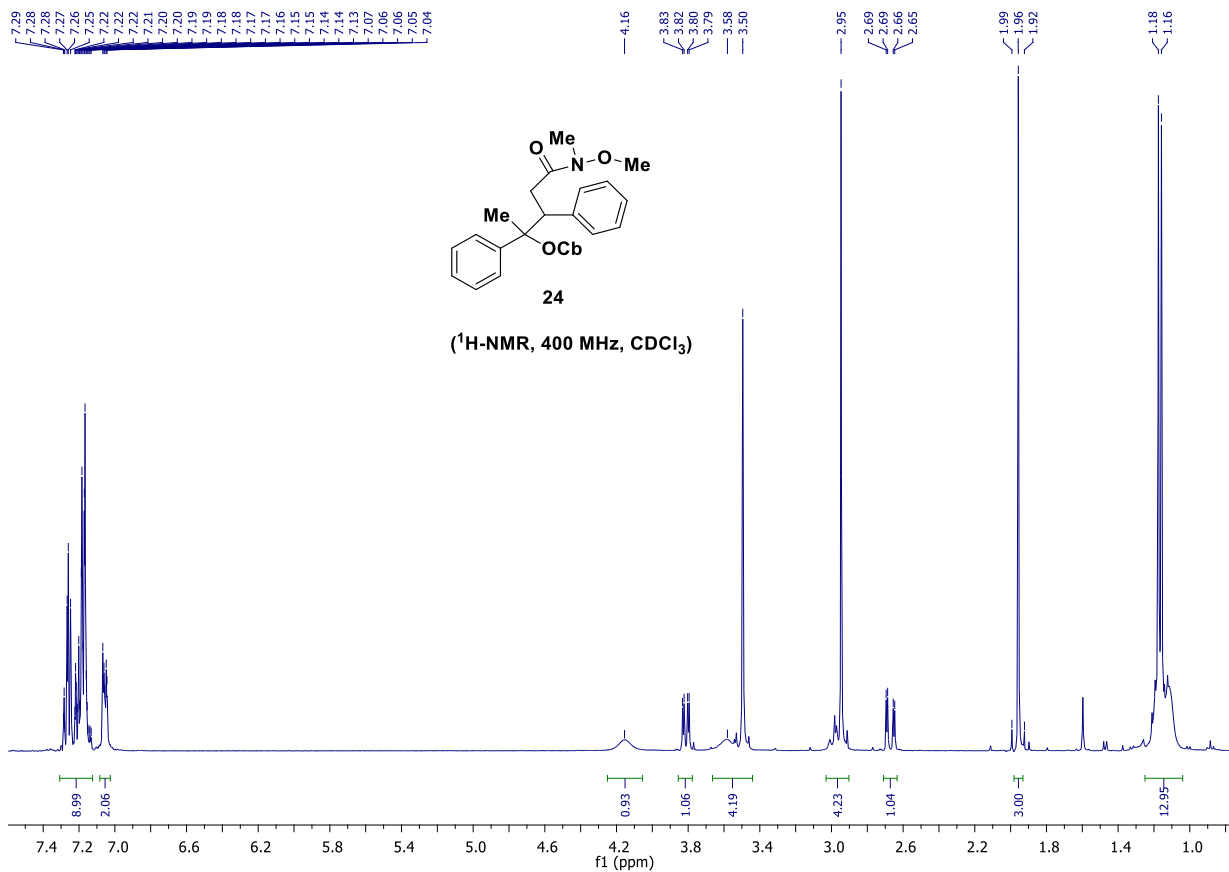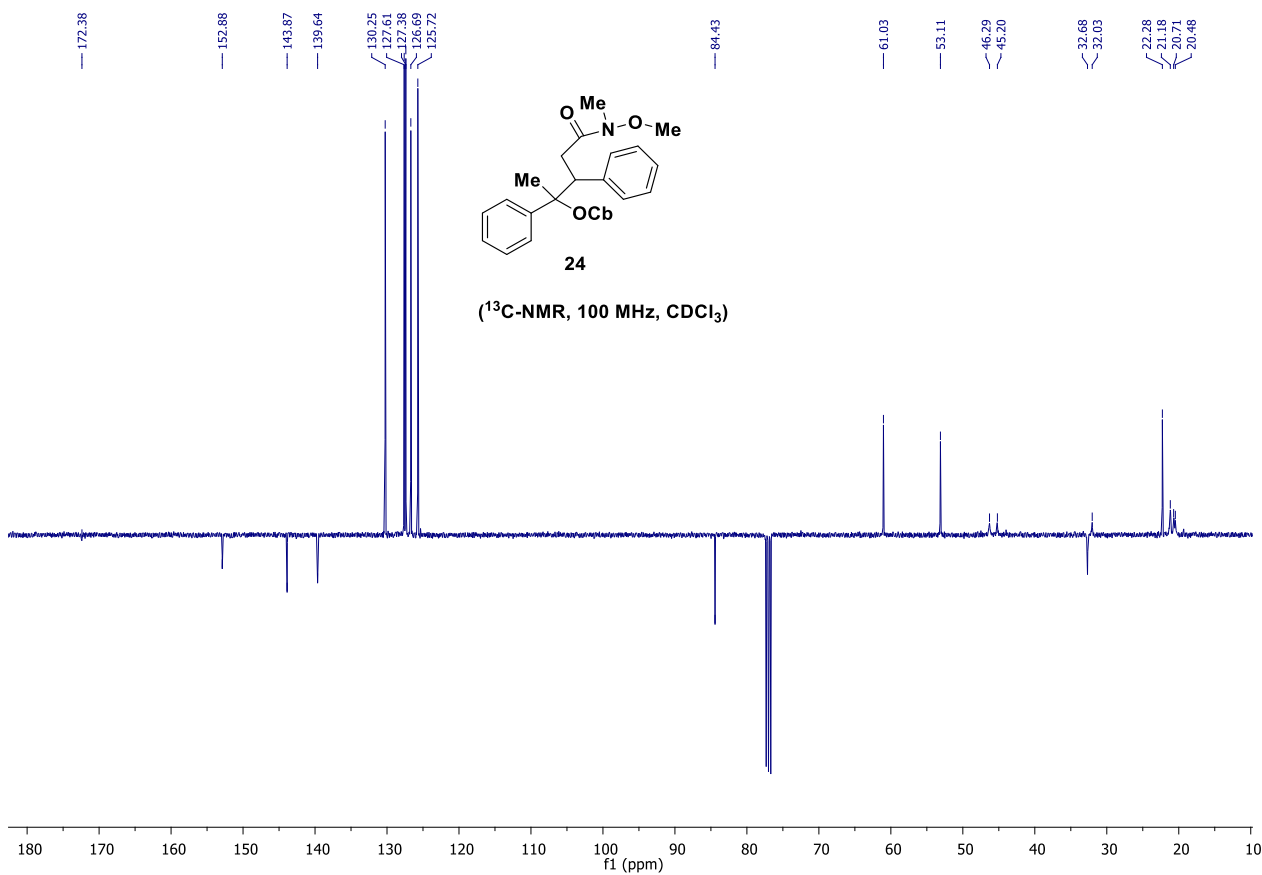

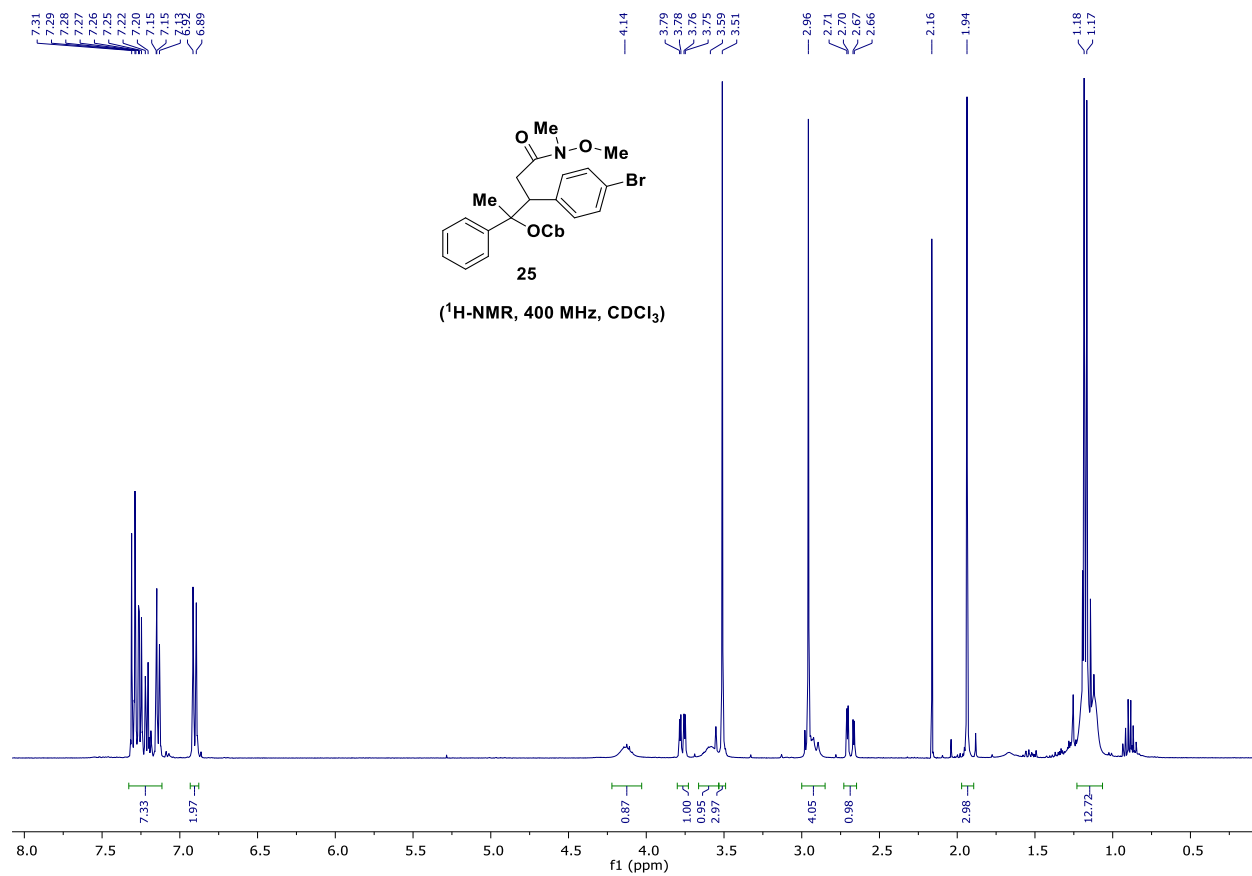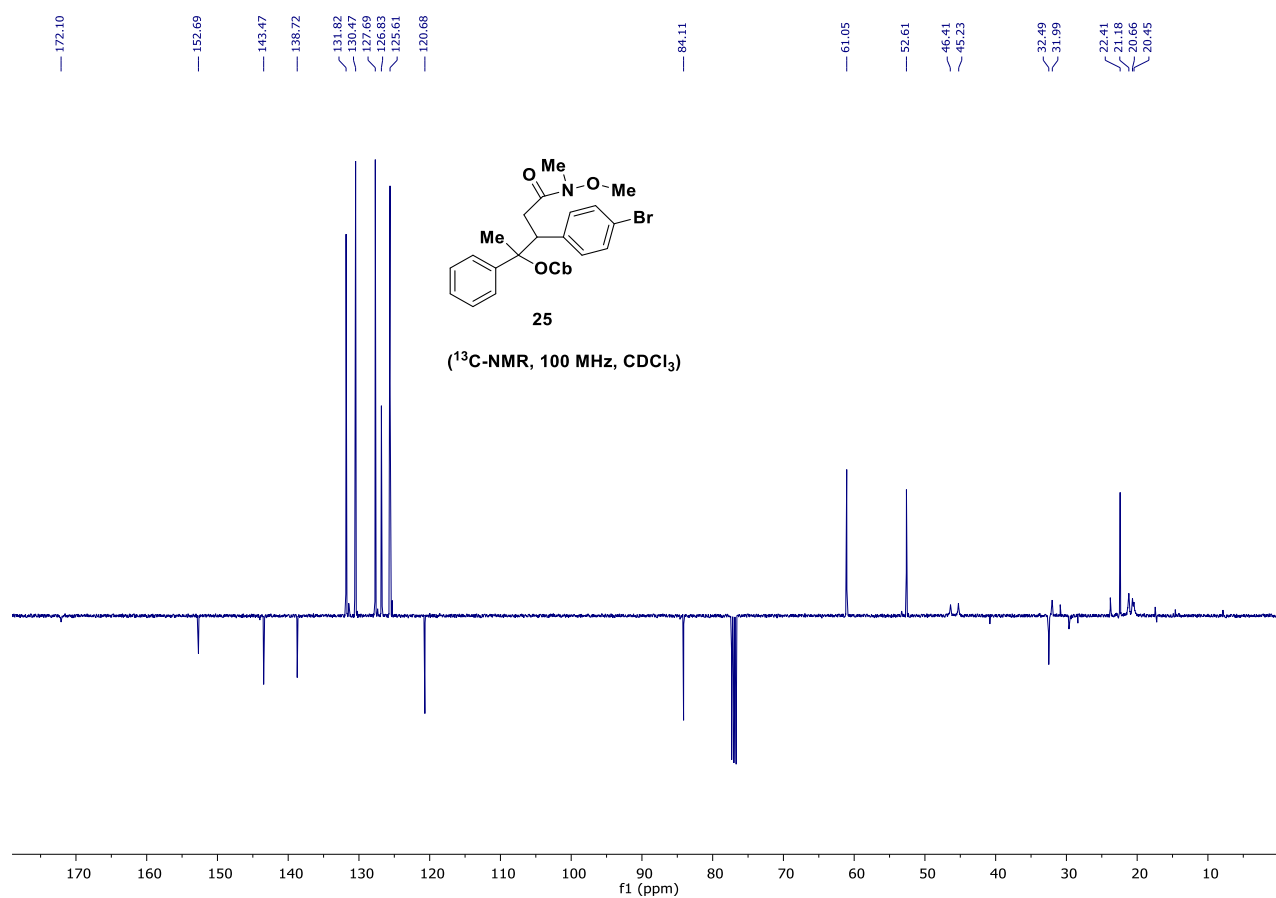

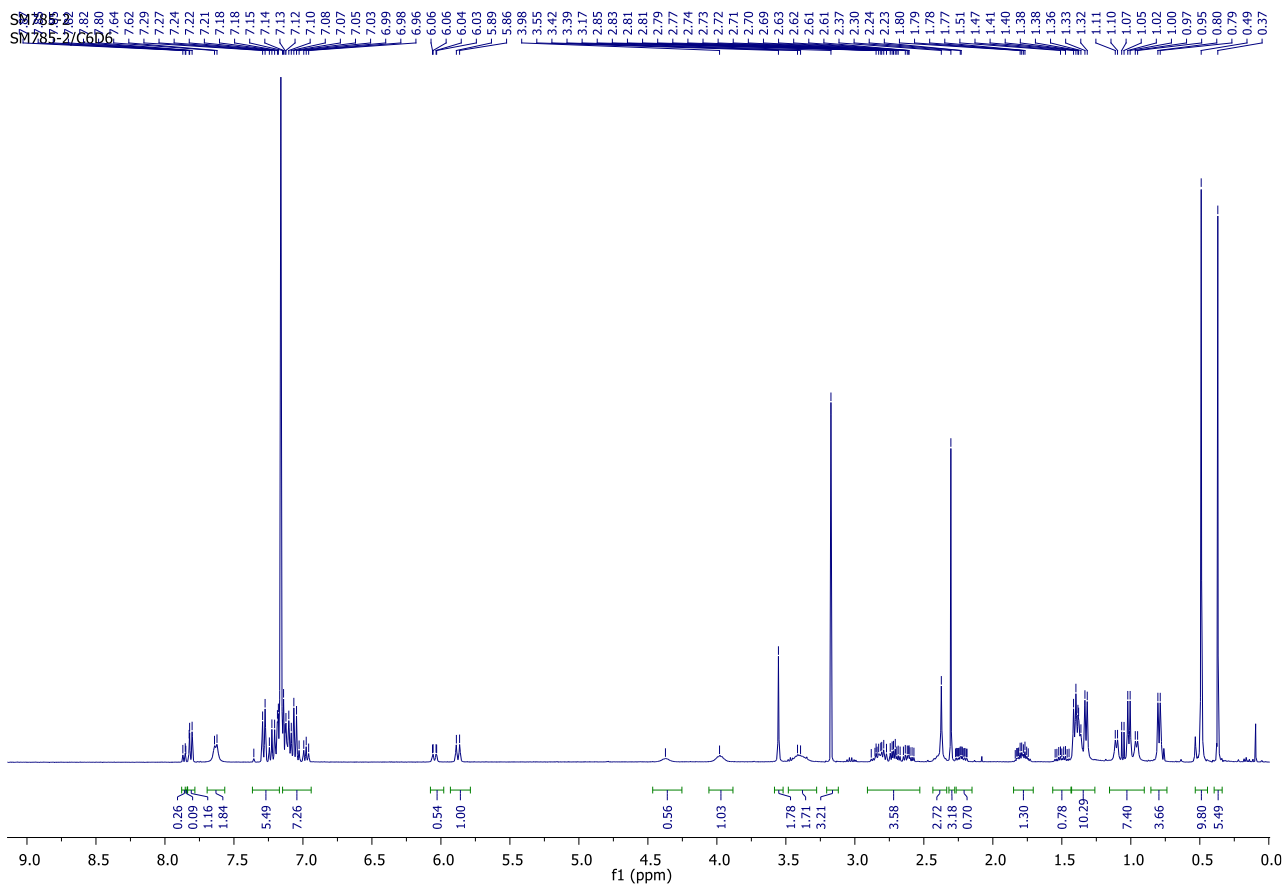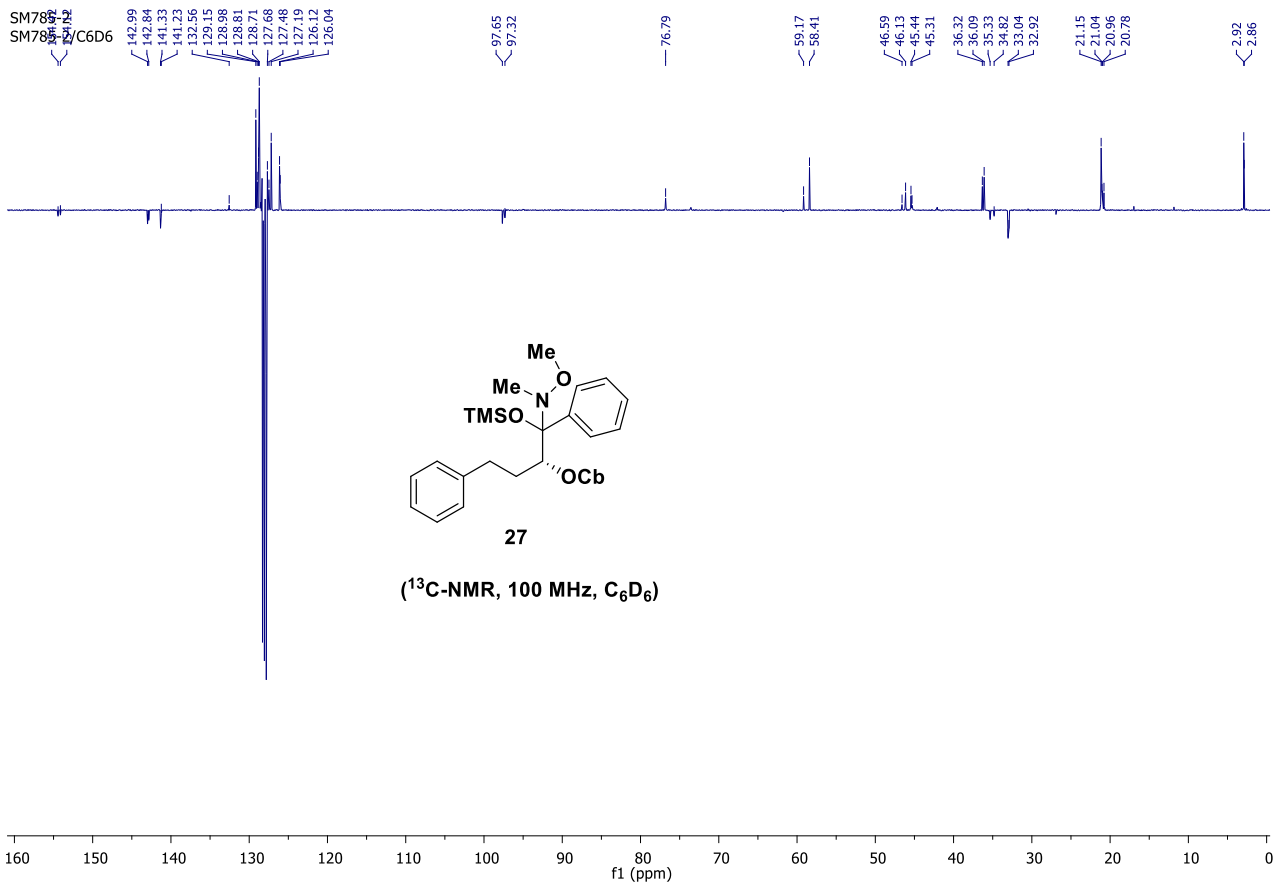



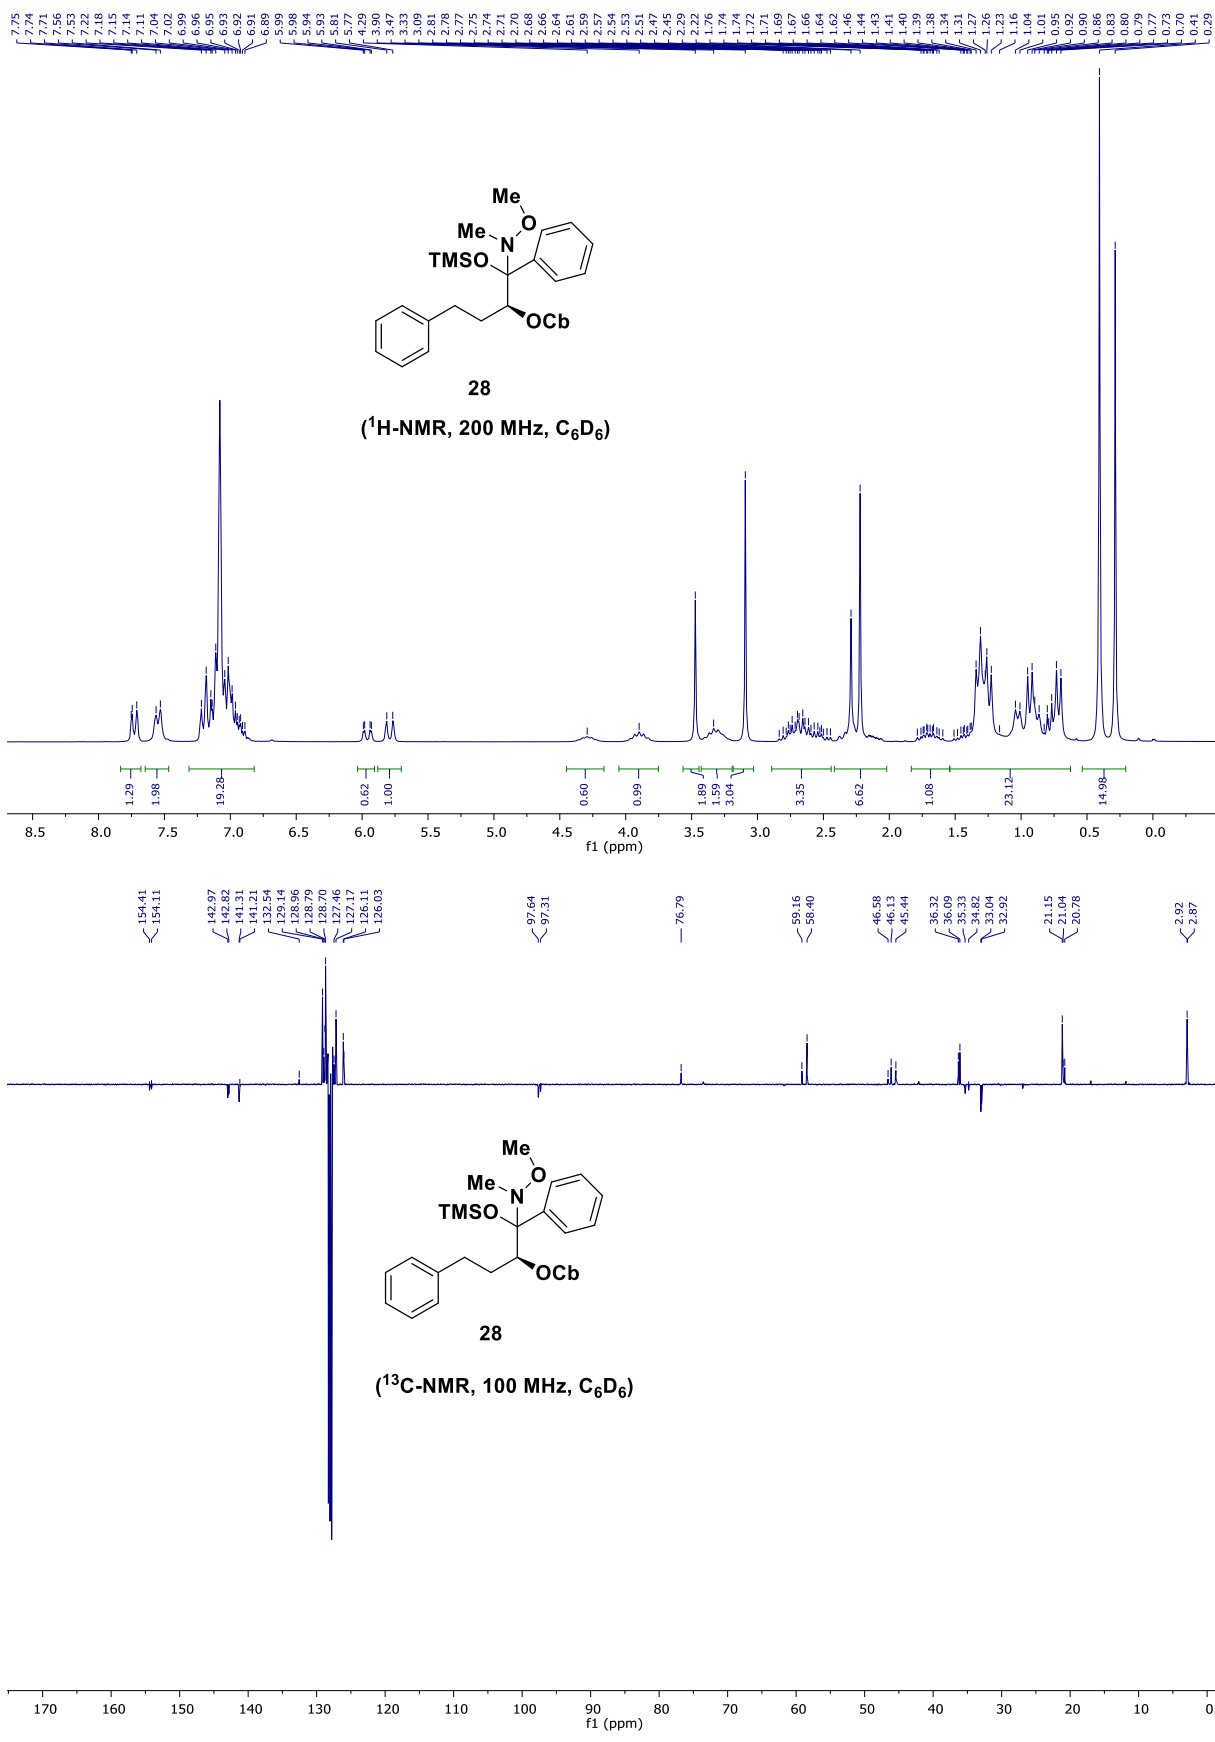

SM787-1a  
SM787-1a/C6D6

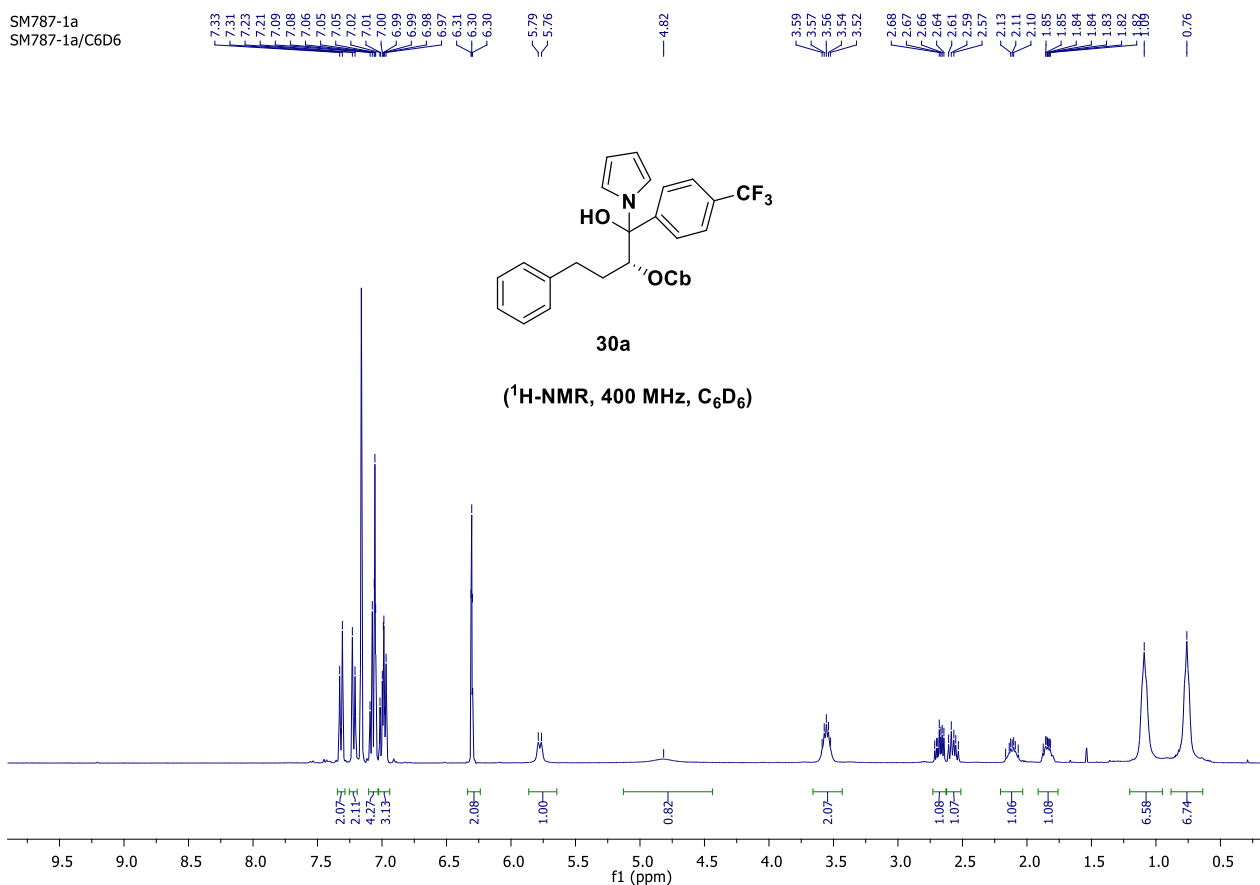

SM787-1a  
SM787-1a/C6D6

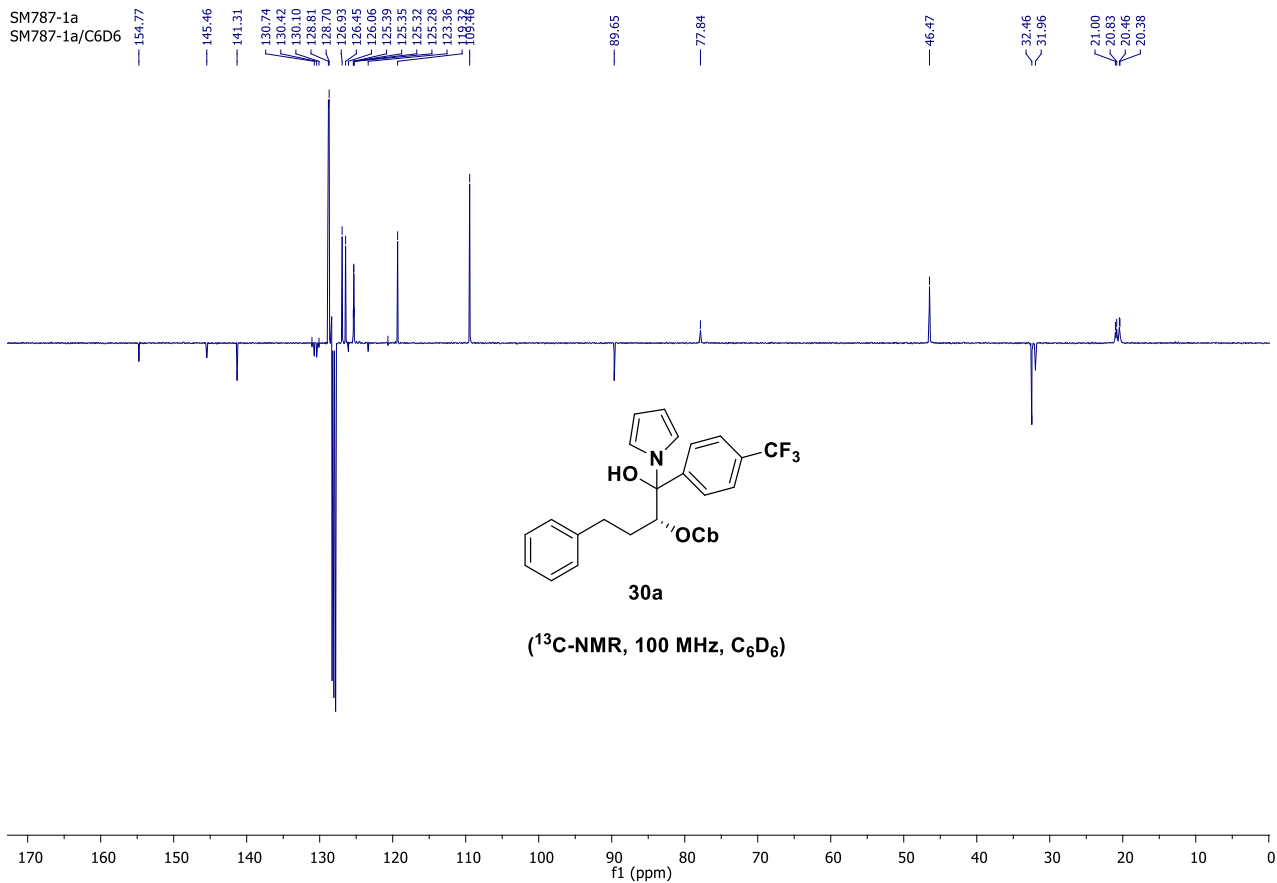

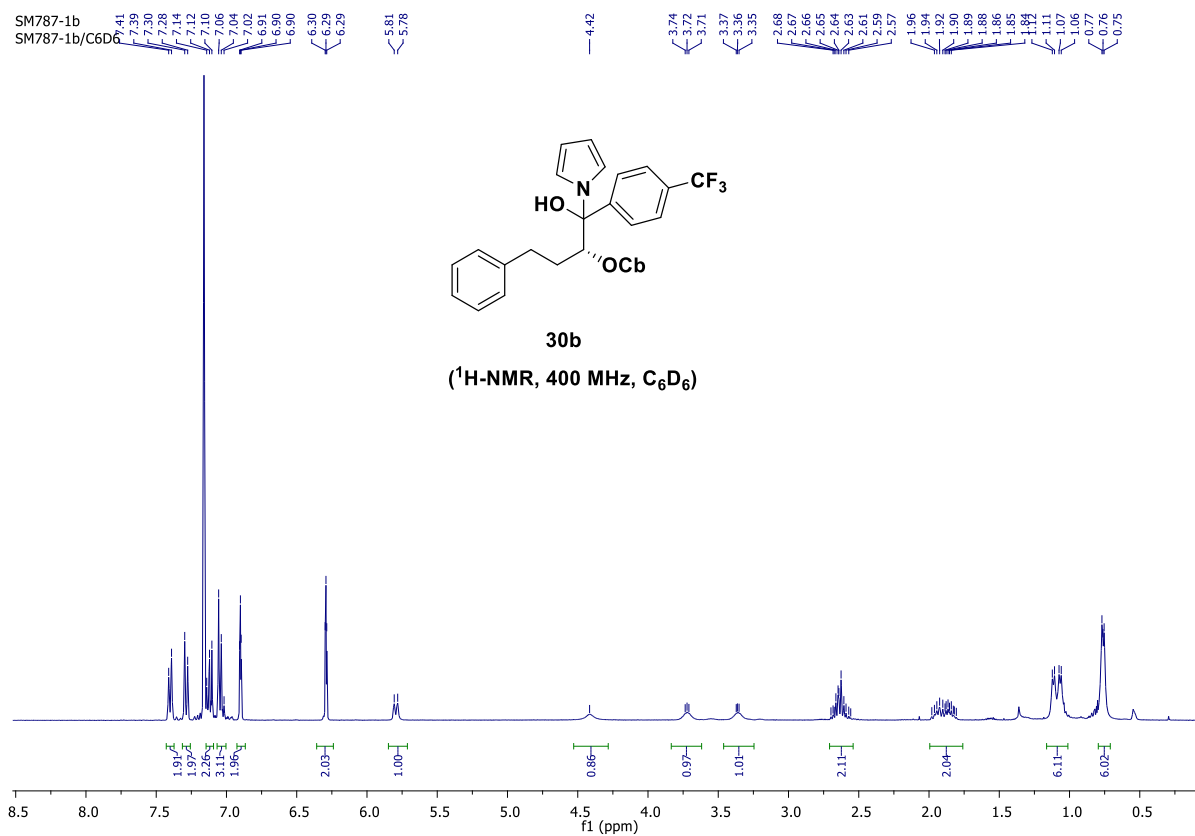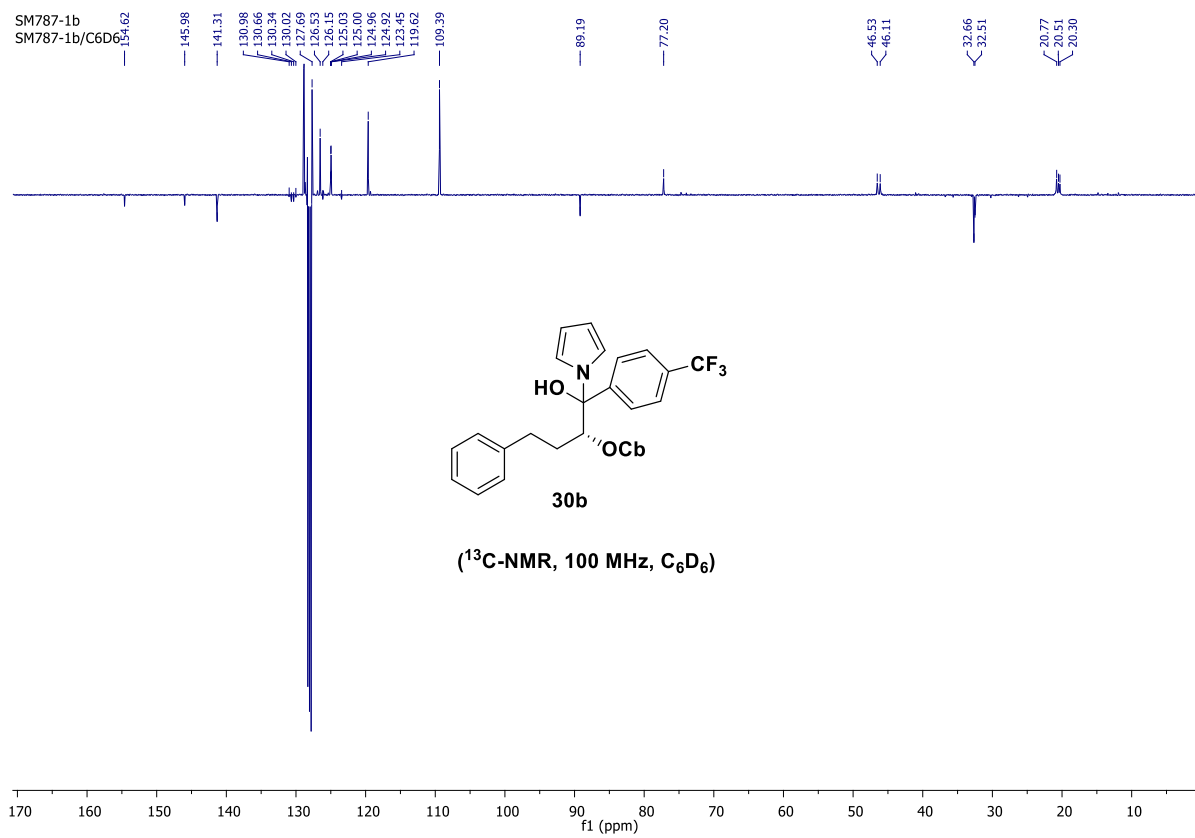

SM788-1a.1.fid  
 SM788-1a/C6D6

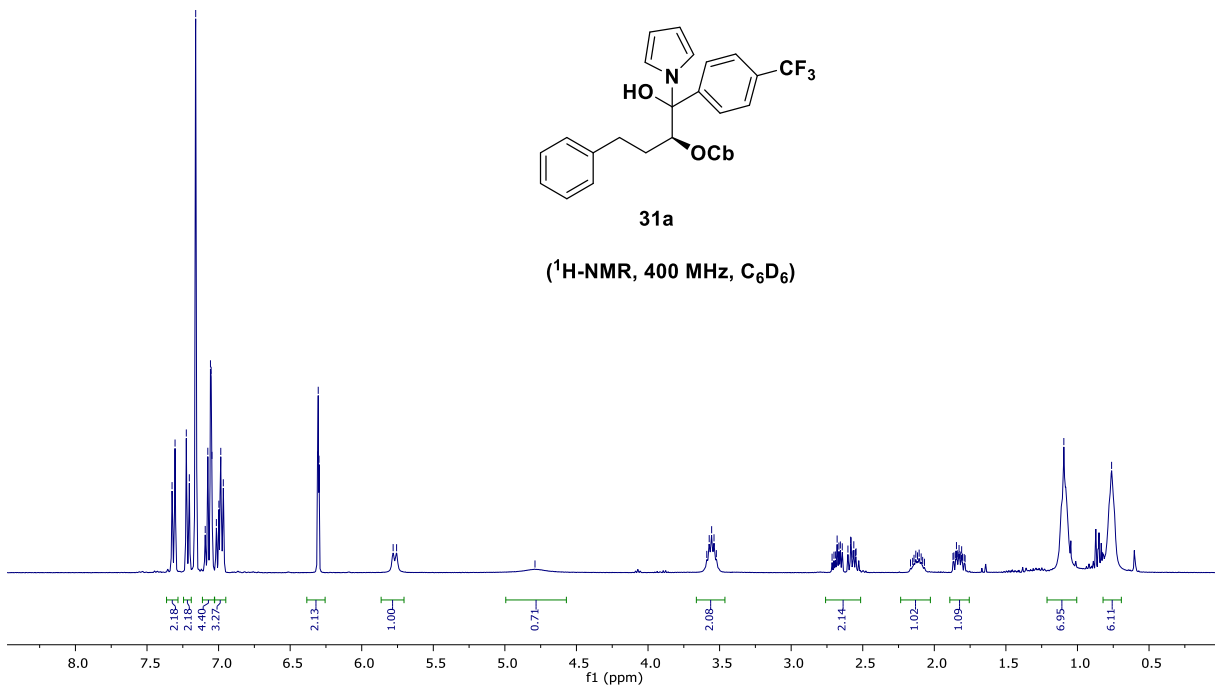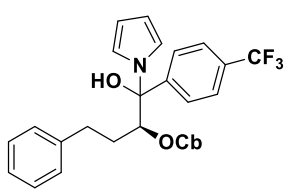

(<sup>1</sup>H-NMR, 400 MHz, C<sub>6</sub>D<sub>6</sub>)

SM788-1a/2  
 SM788-1a/C6D6

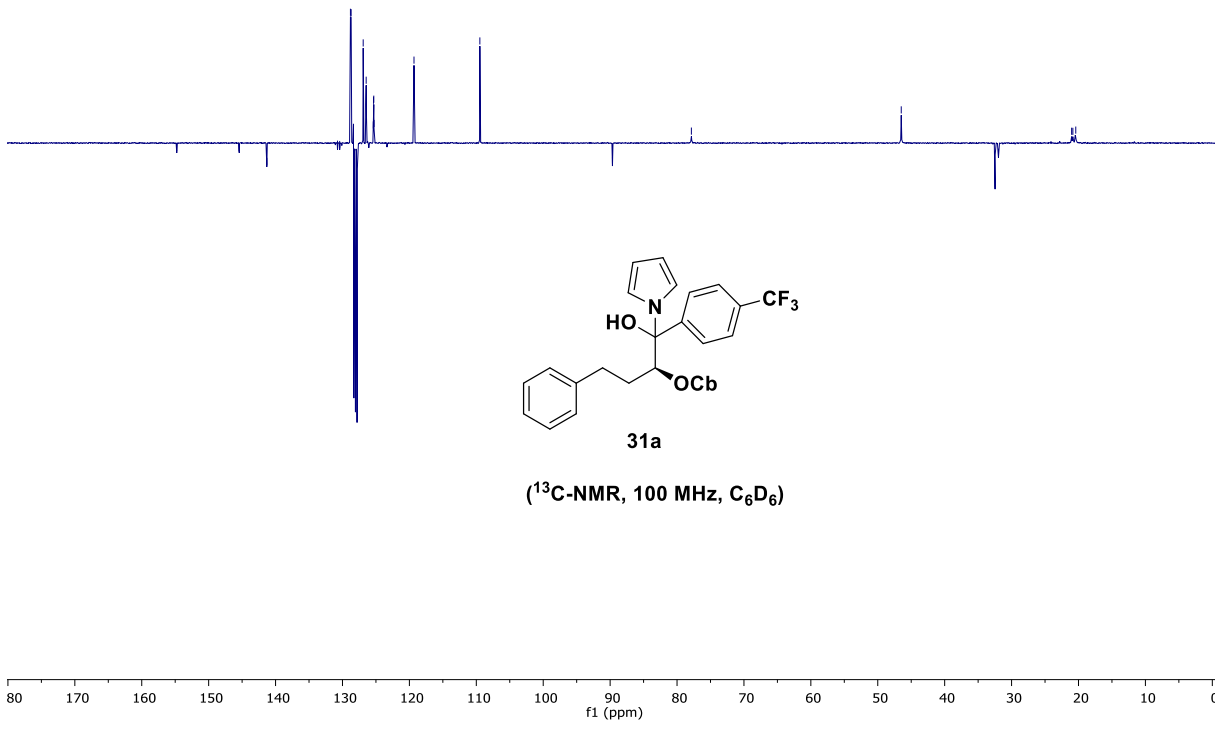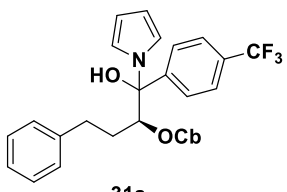

(<sup>13</sup>C-NMR, 100 MHz, C<sub>6</sub>D<sub>6</sub>)

SM788-1c.1.fid  
SM788-1c/C6D6

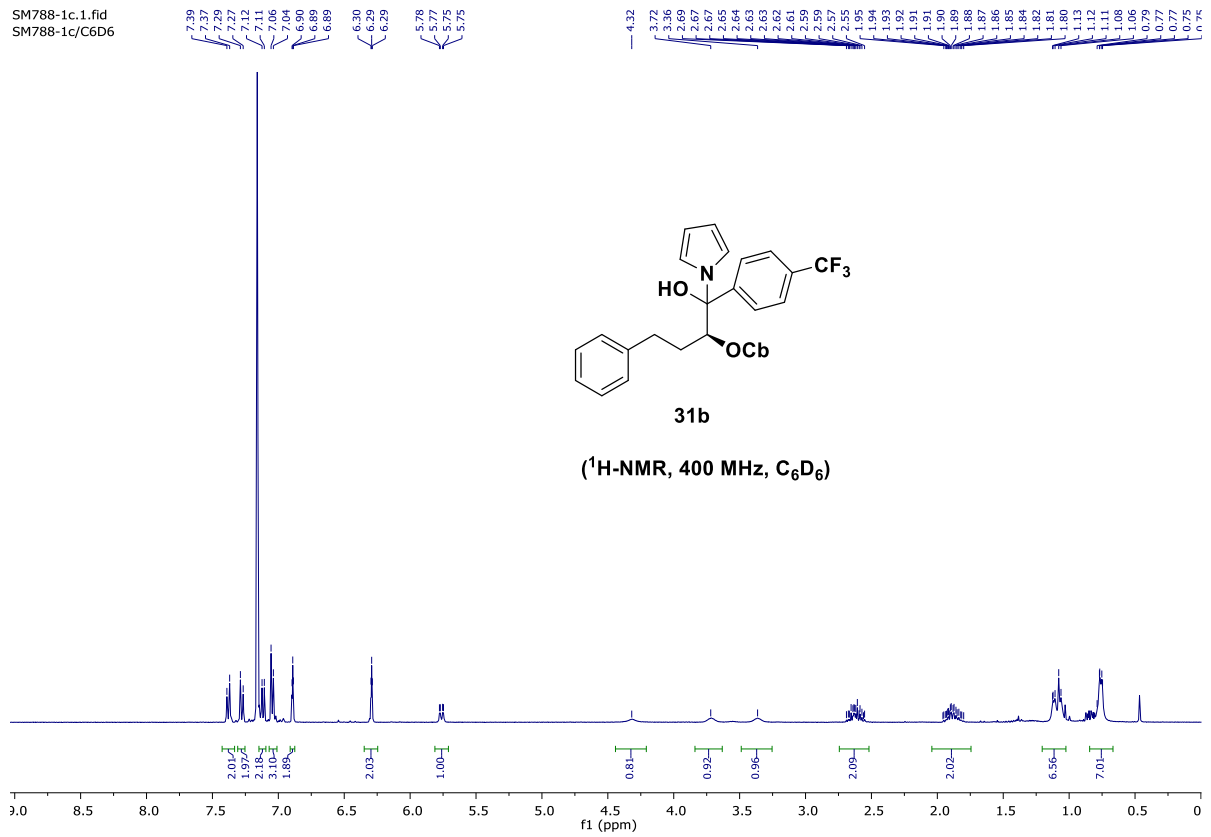

SM788-1c.2.fid  
SM788-1c/C6D6

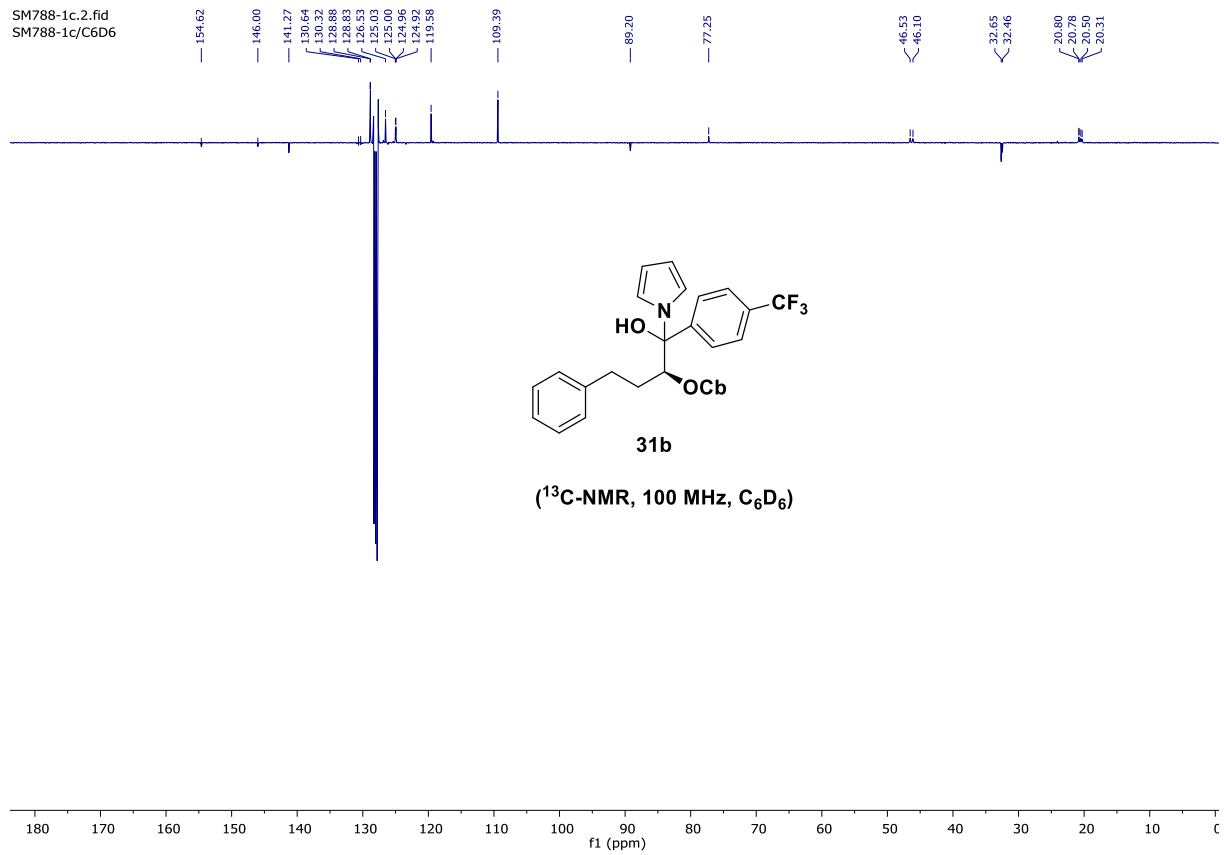

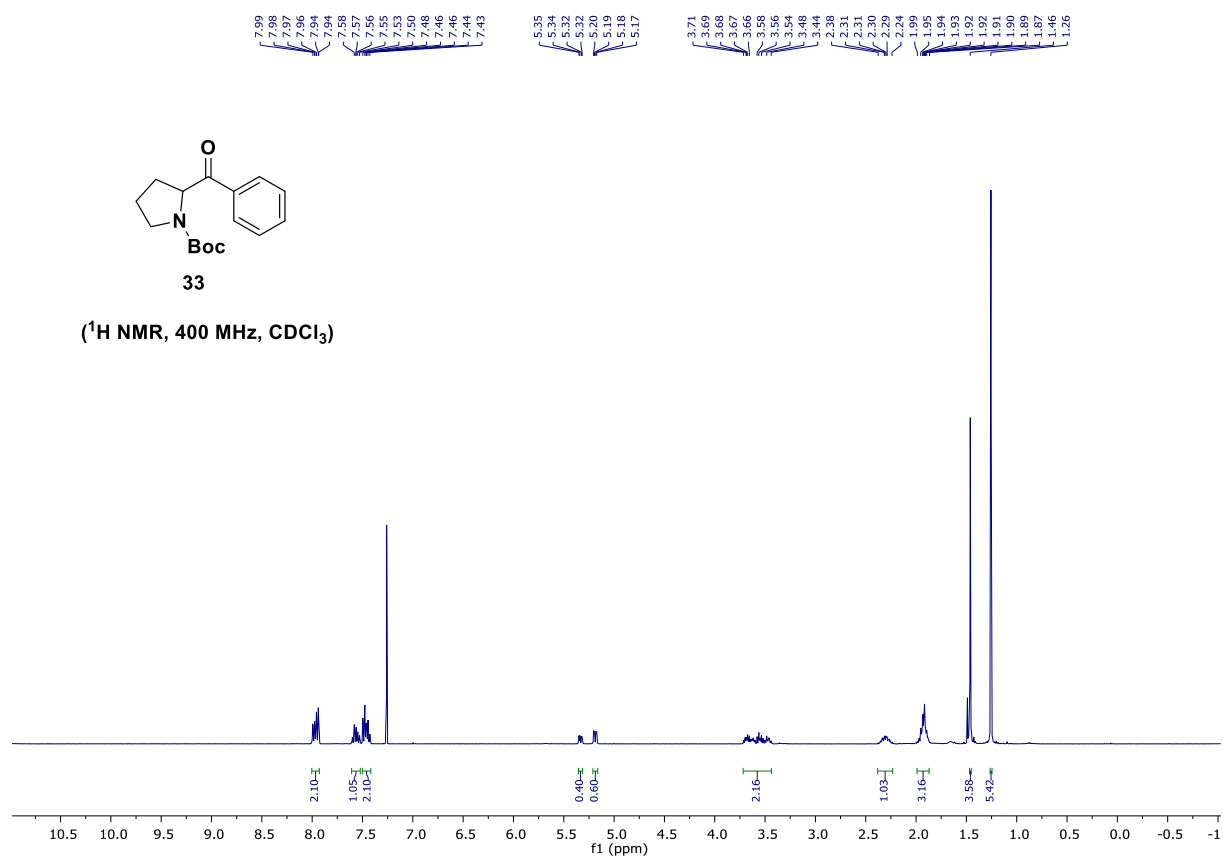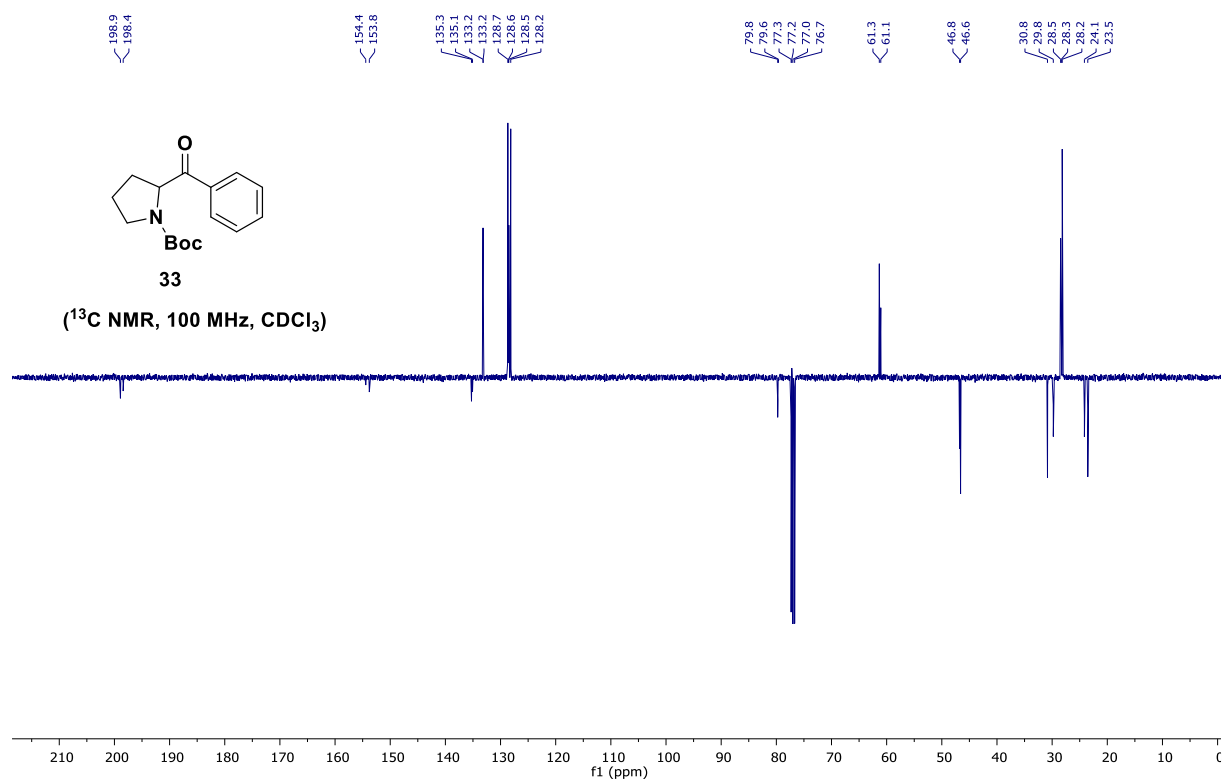

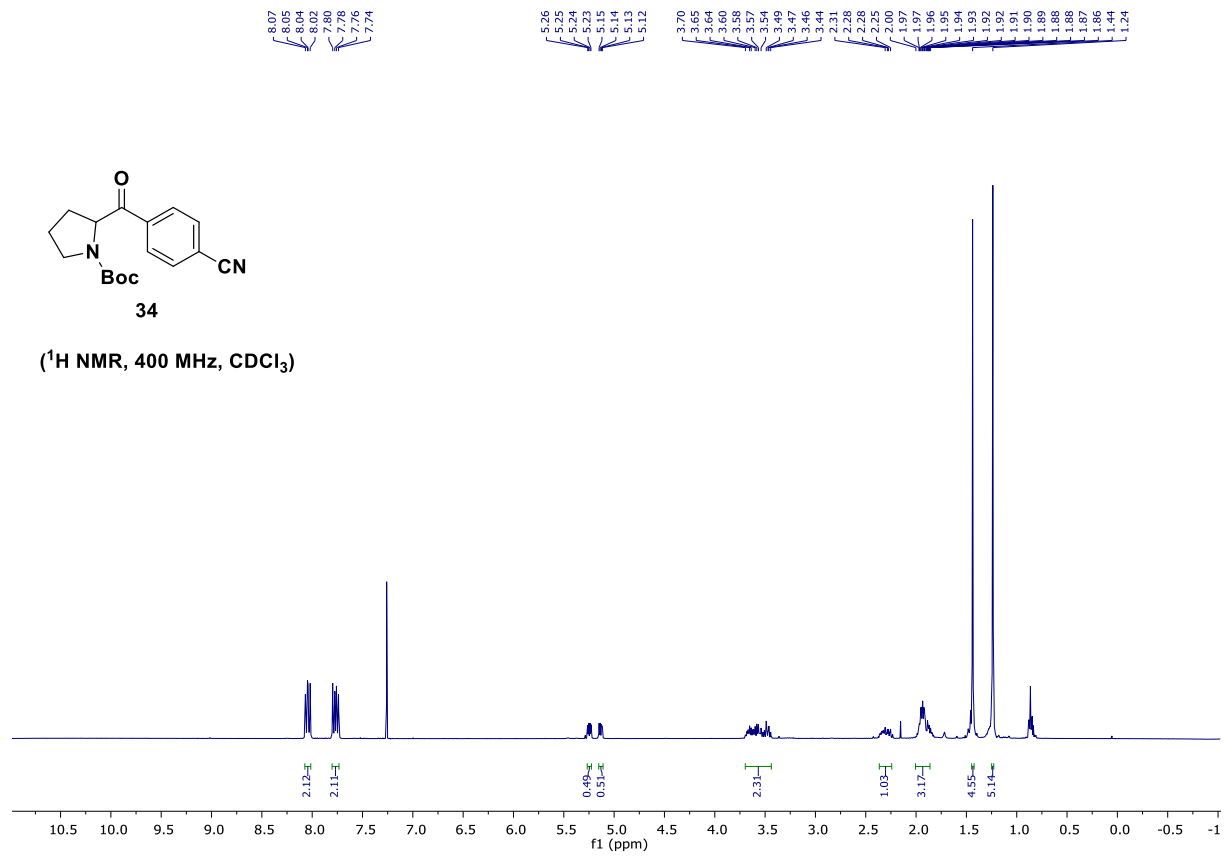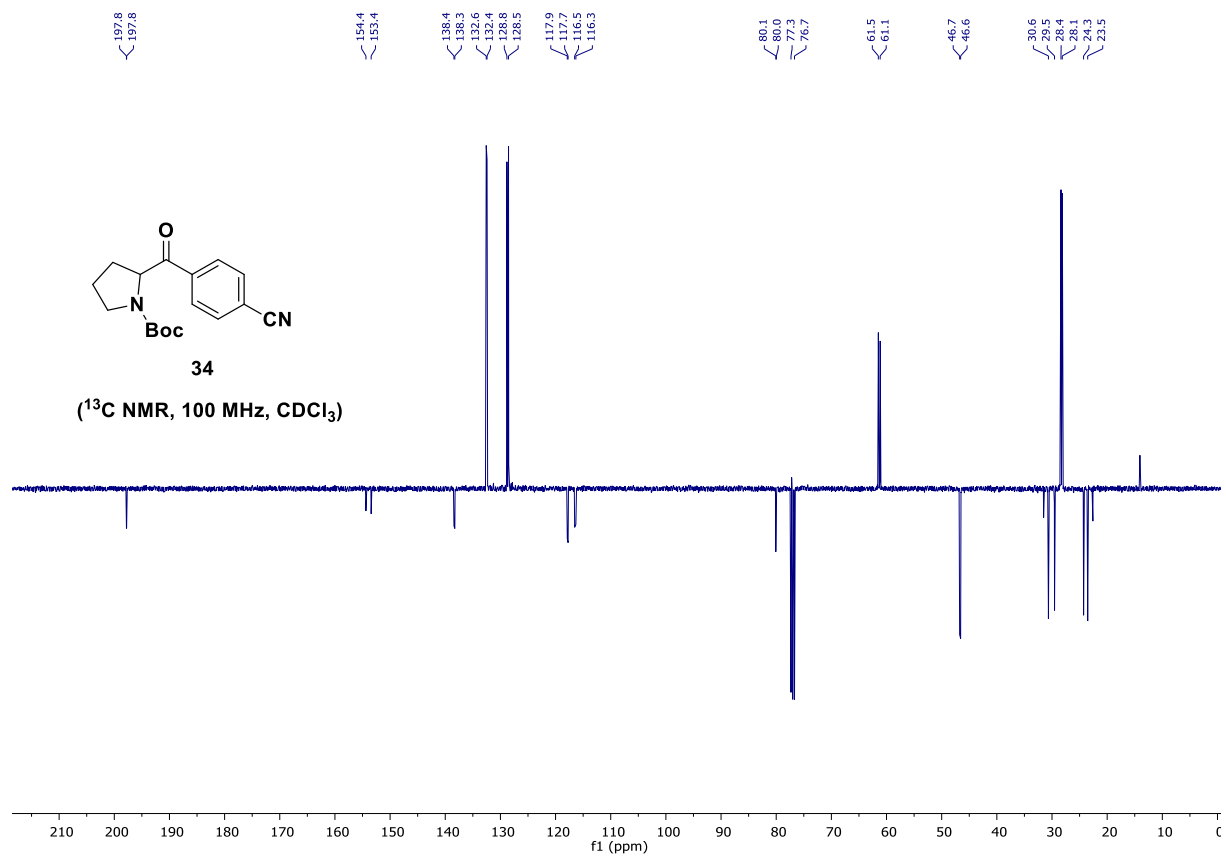

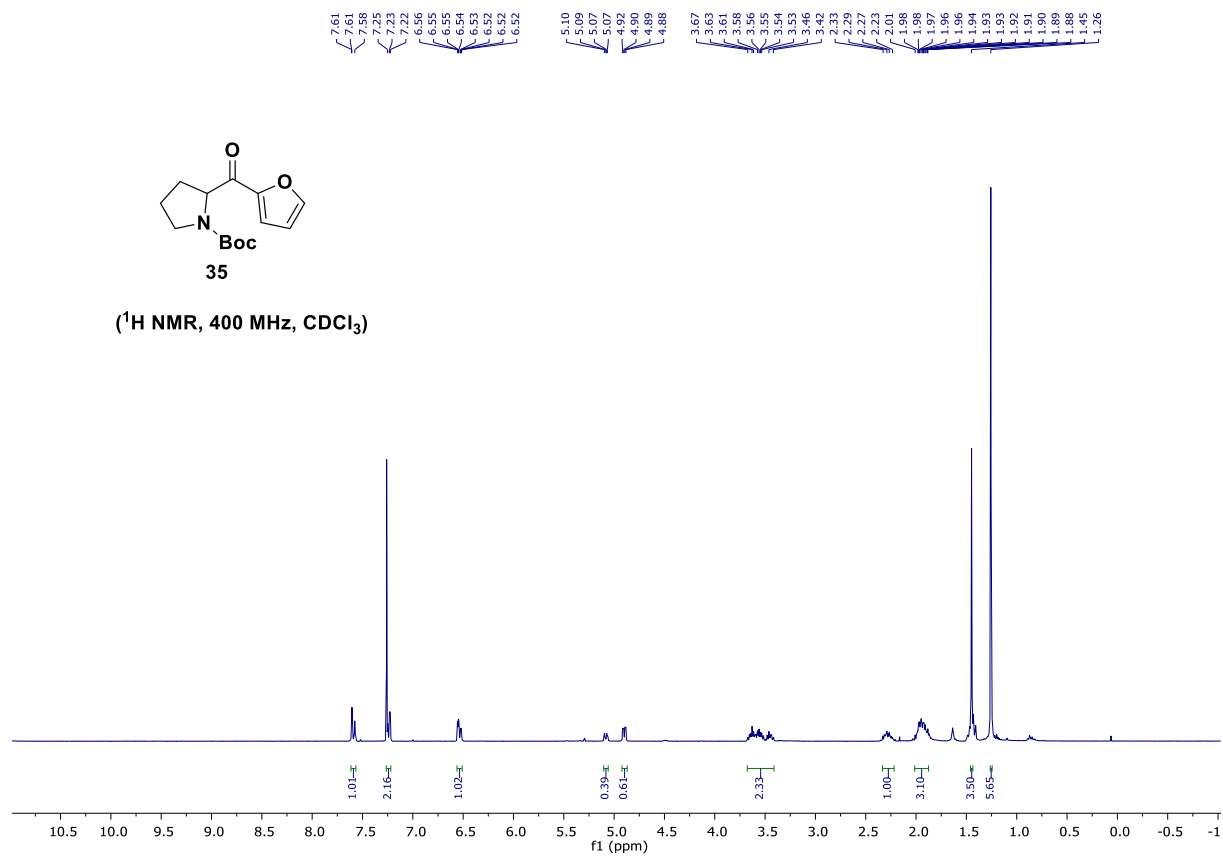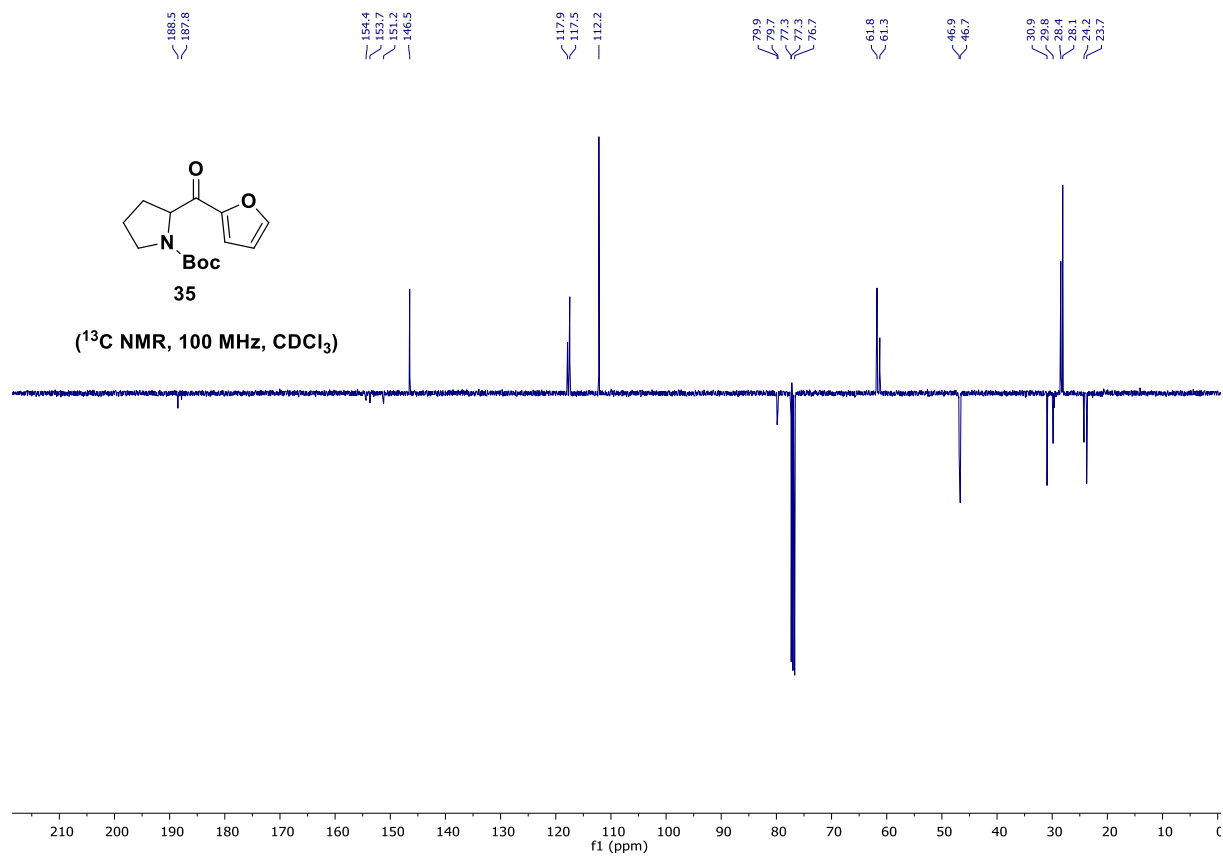



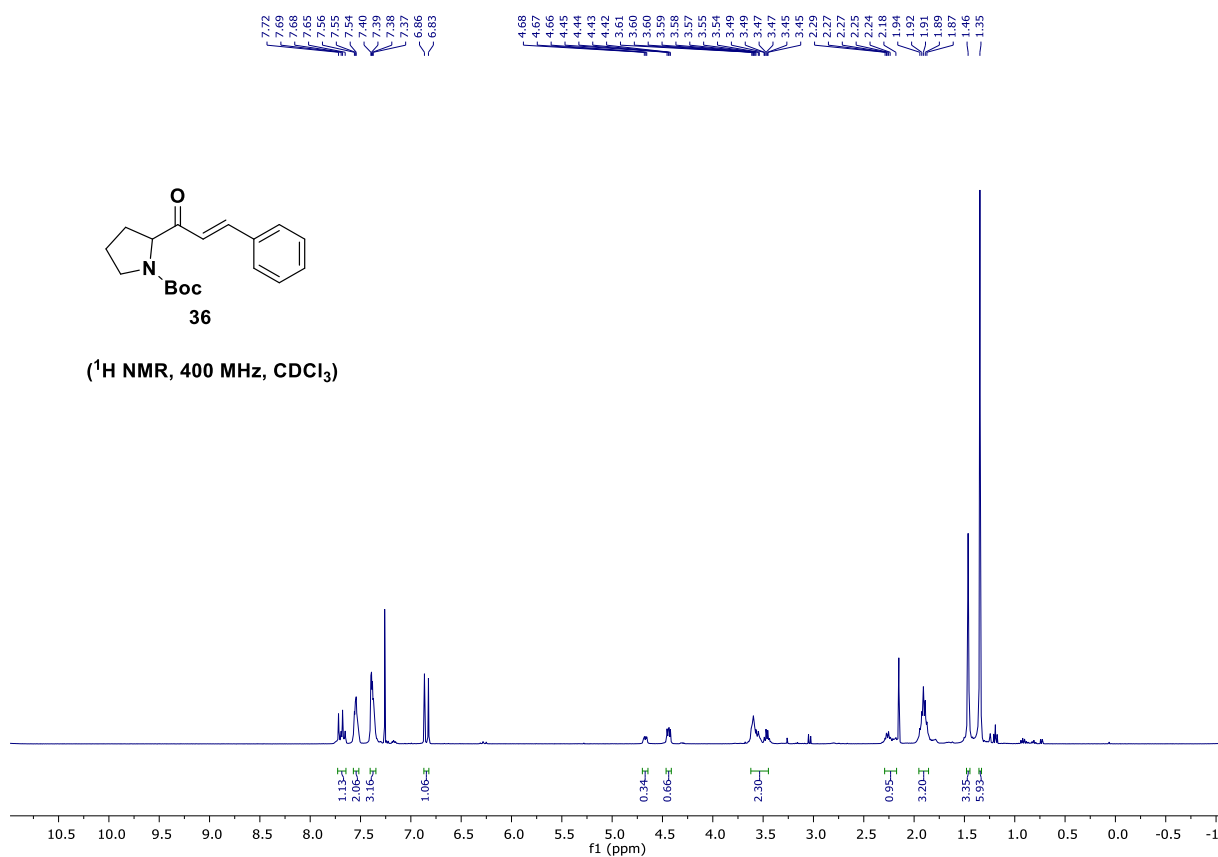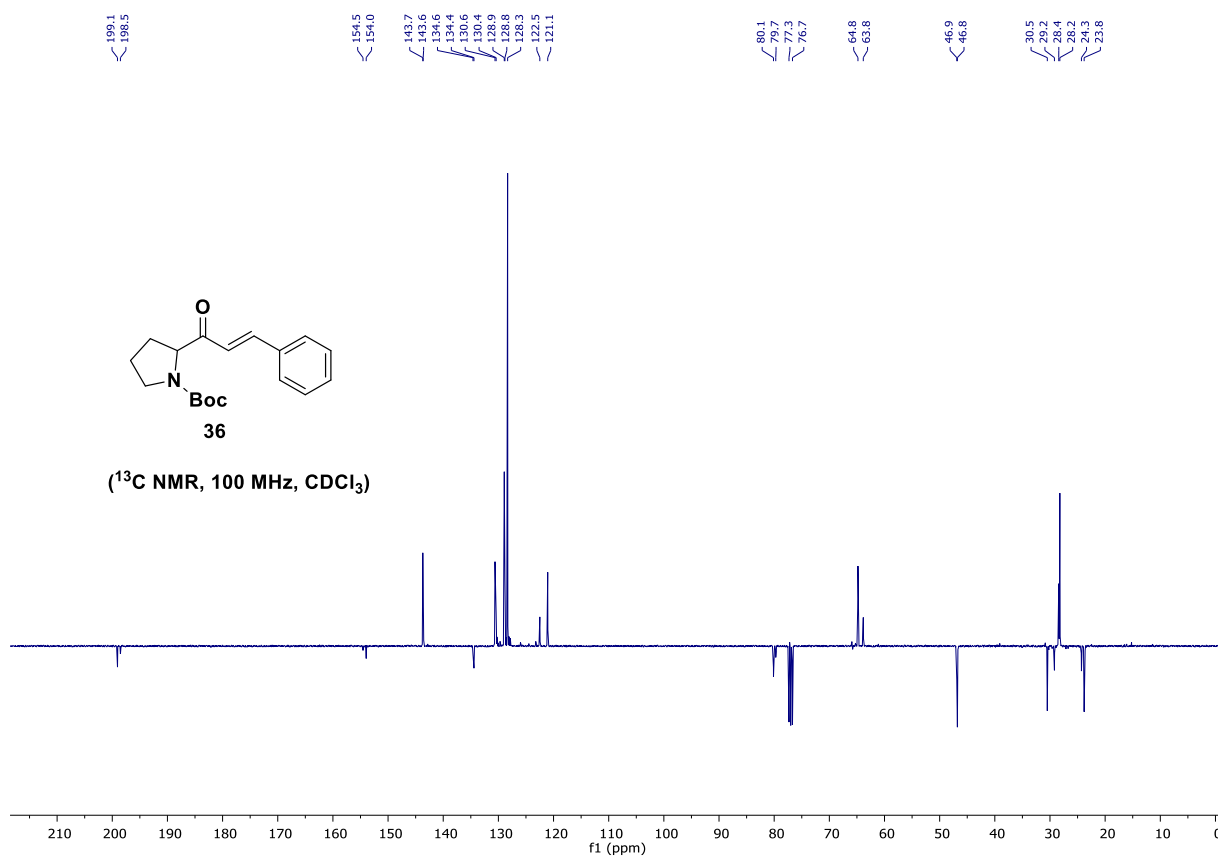

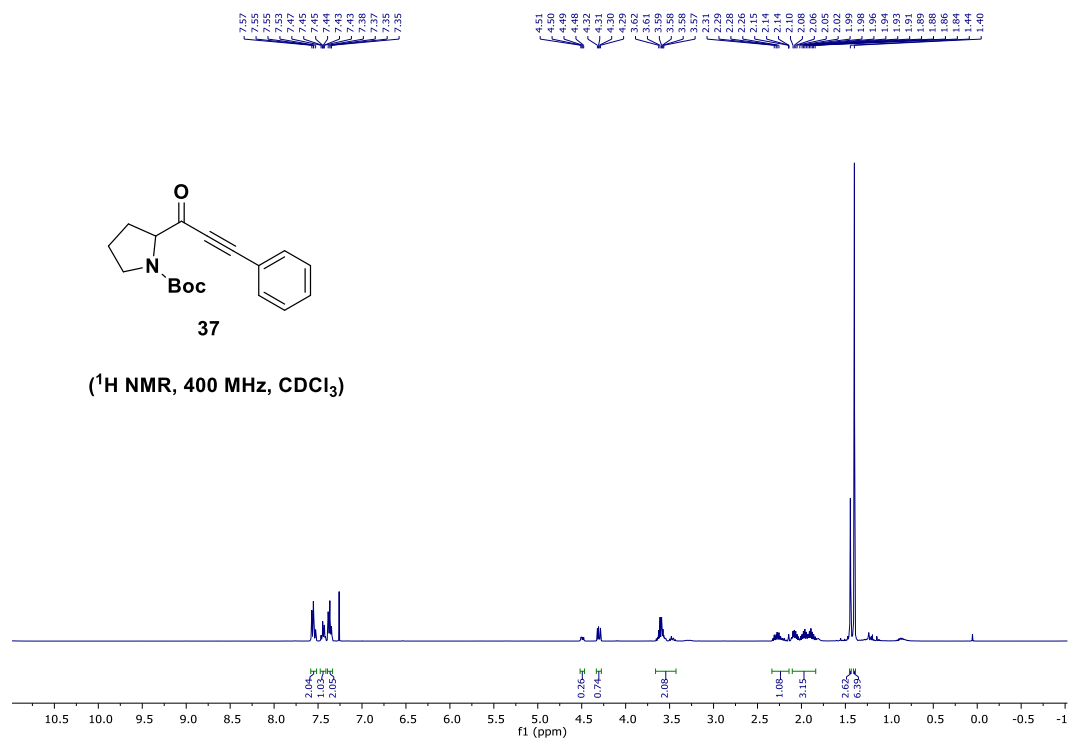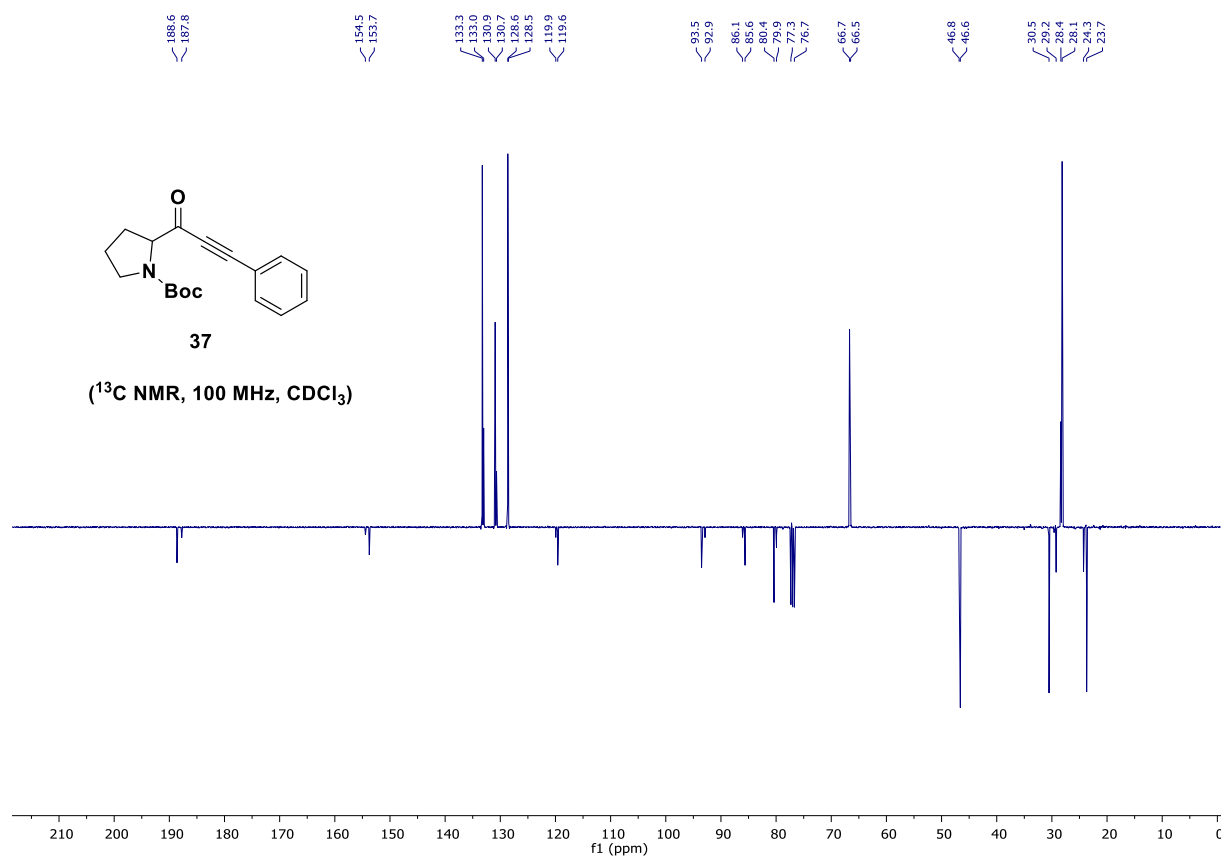

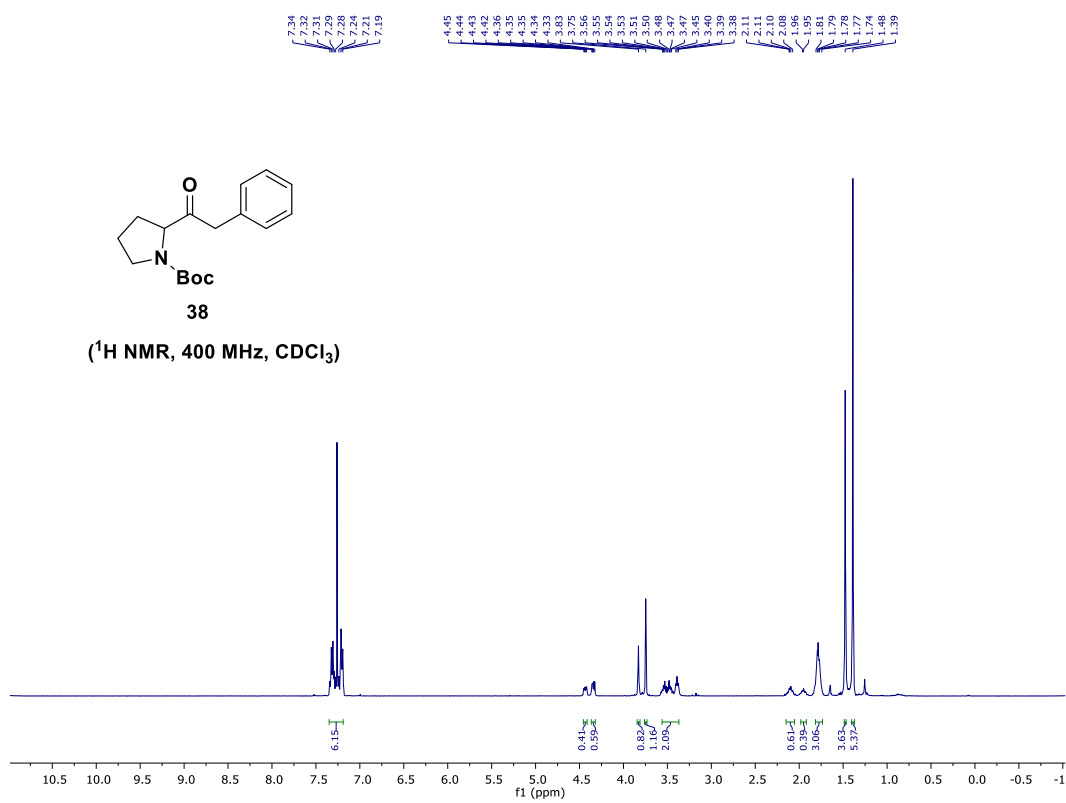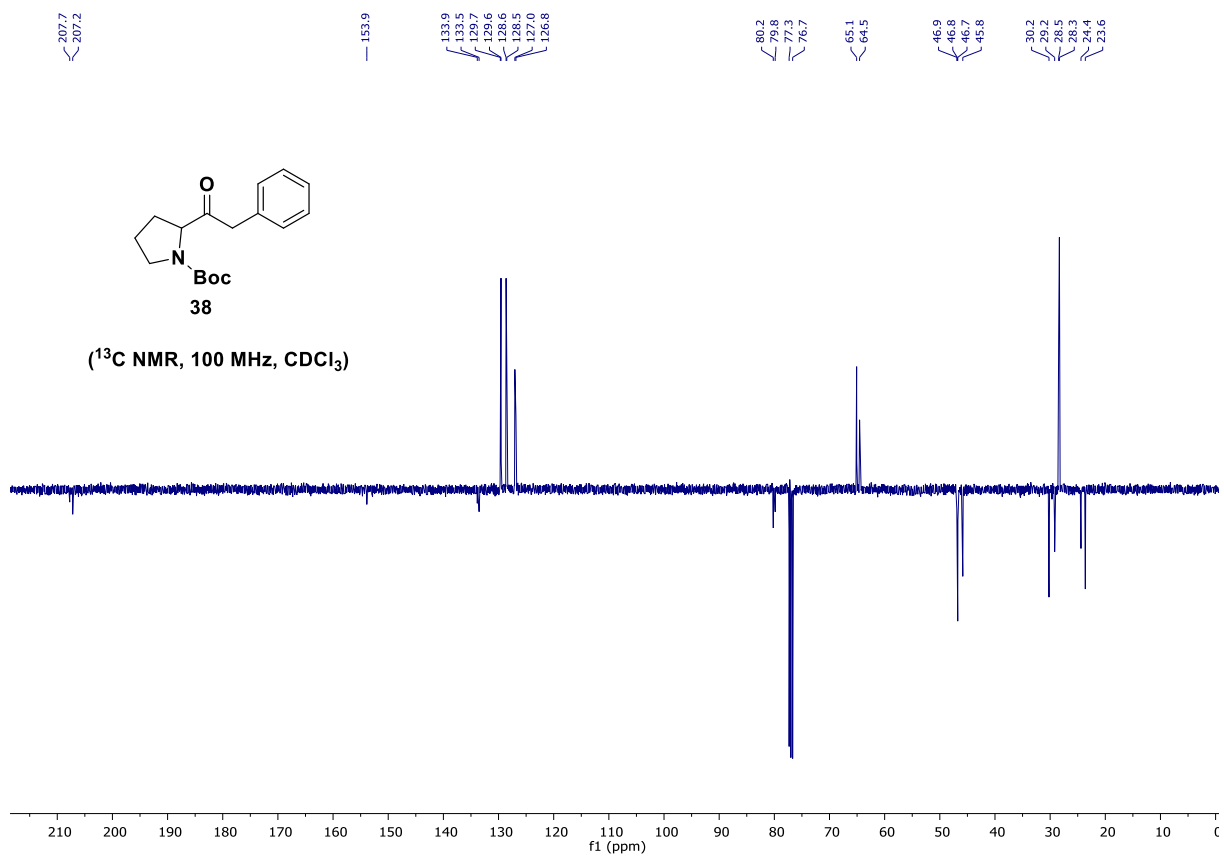

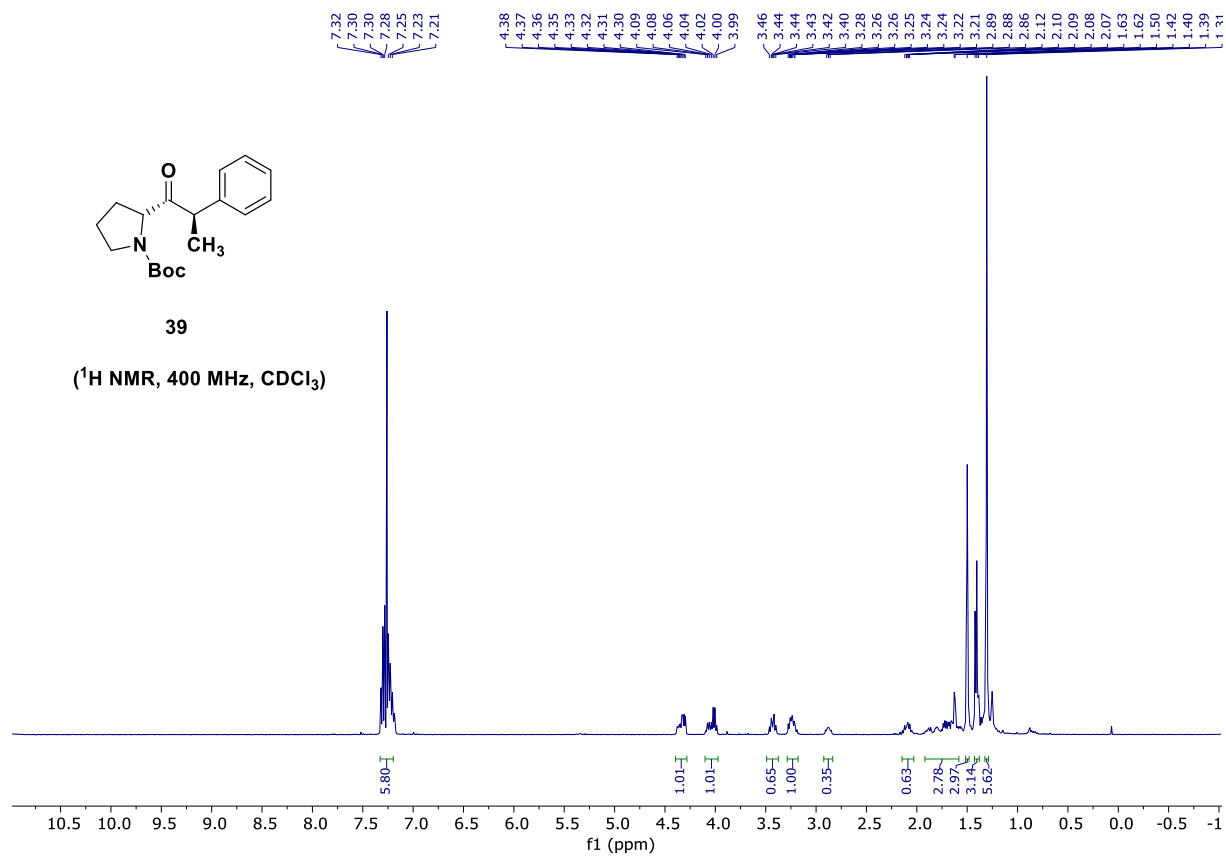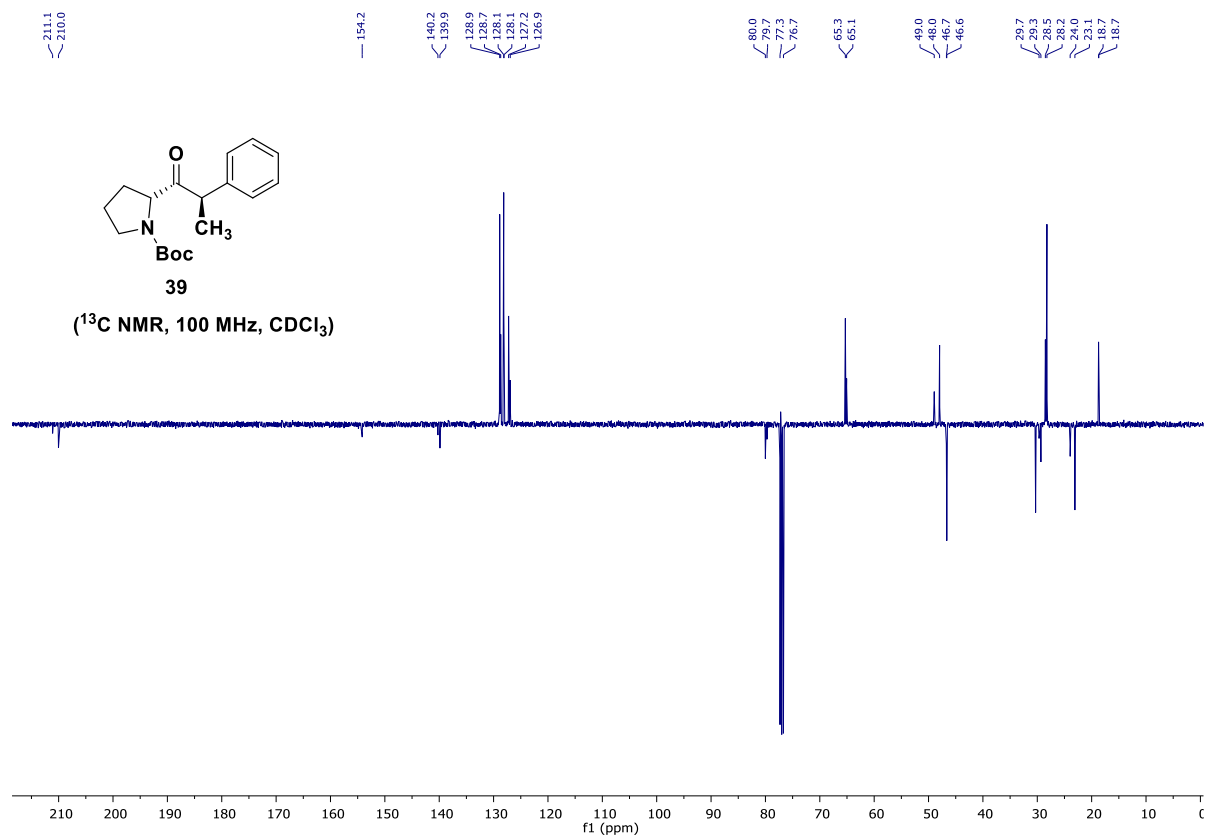

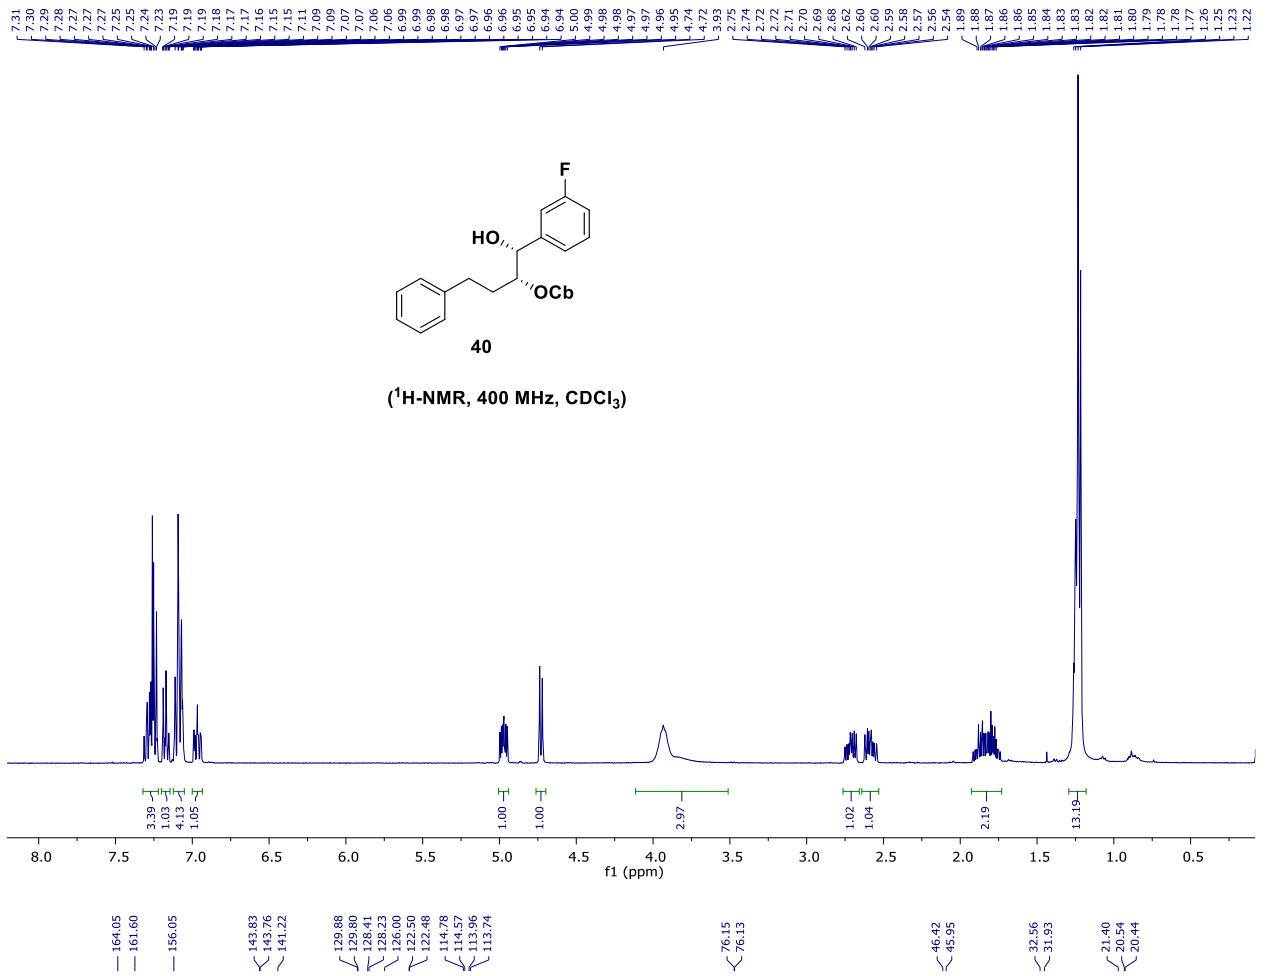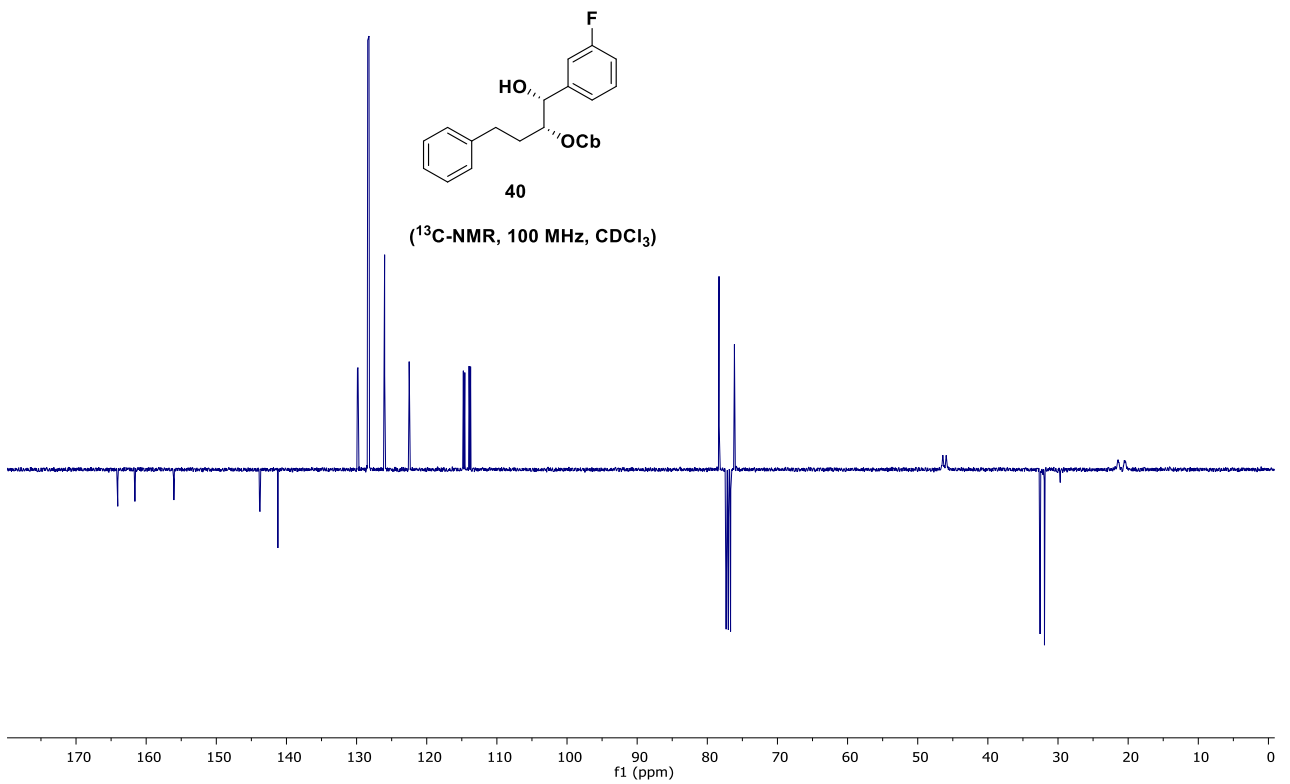

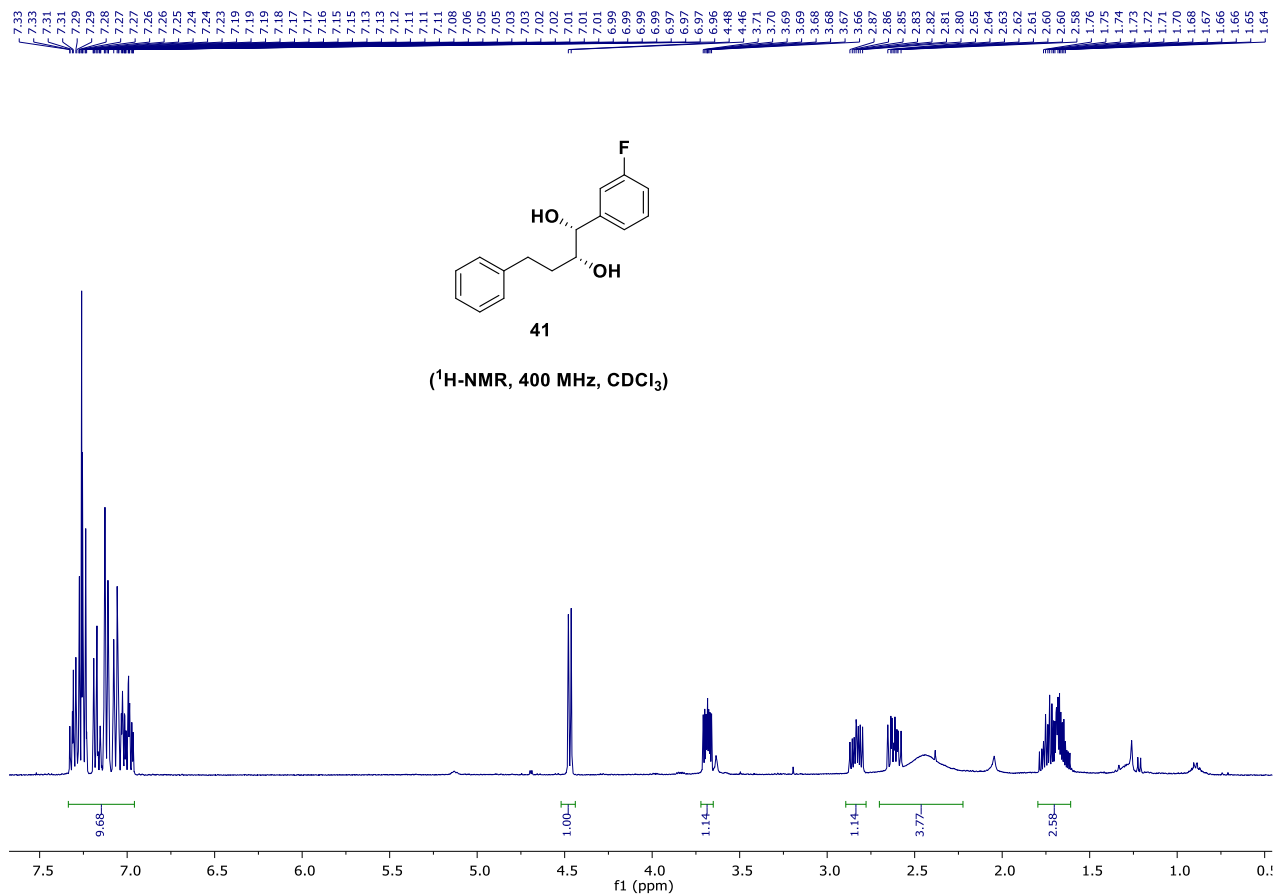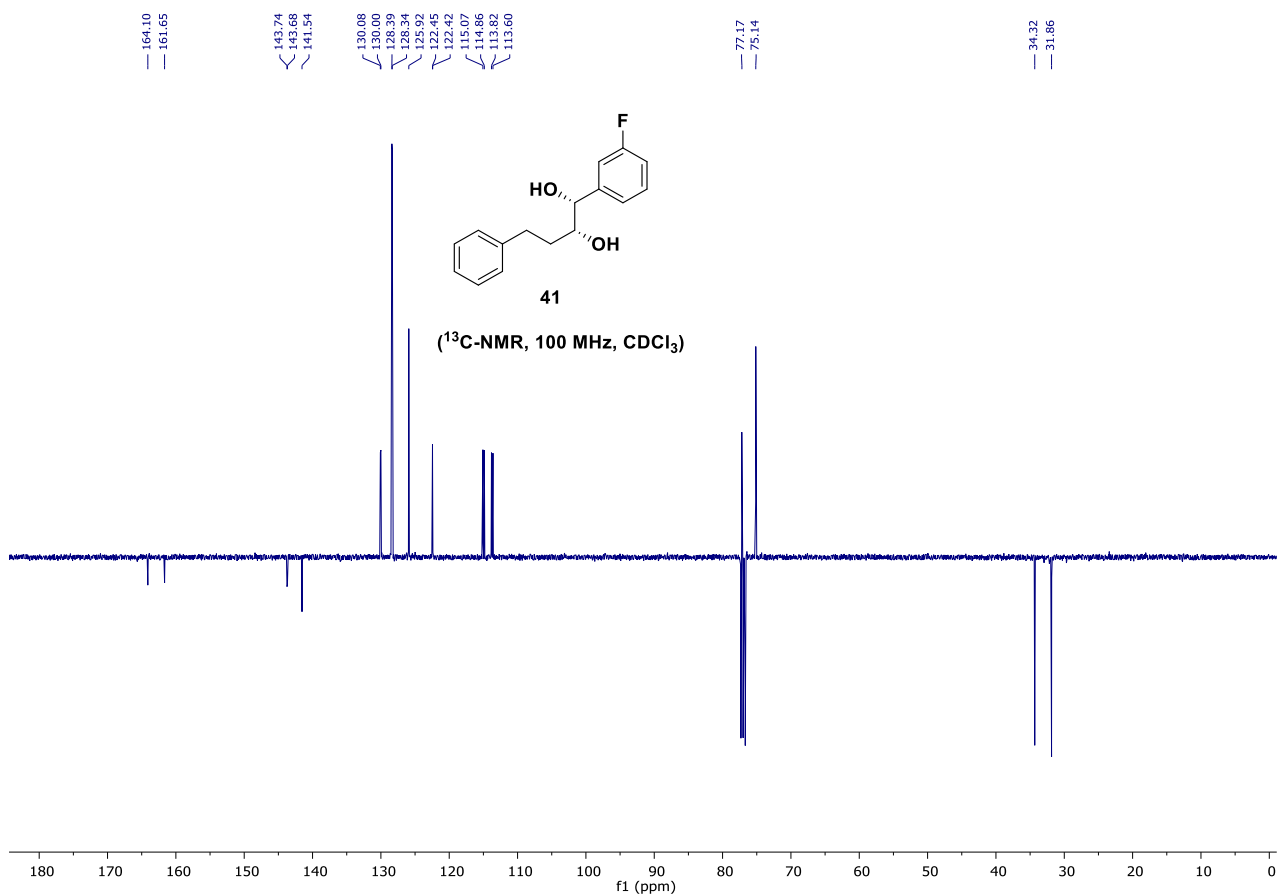

Proof of *syn* orientation of 1,2-diol **42** via NOESY experiment on the derived acetoneide:

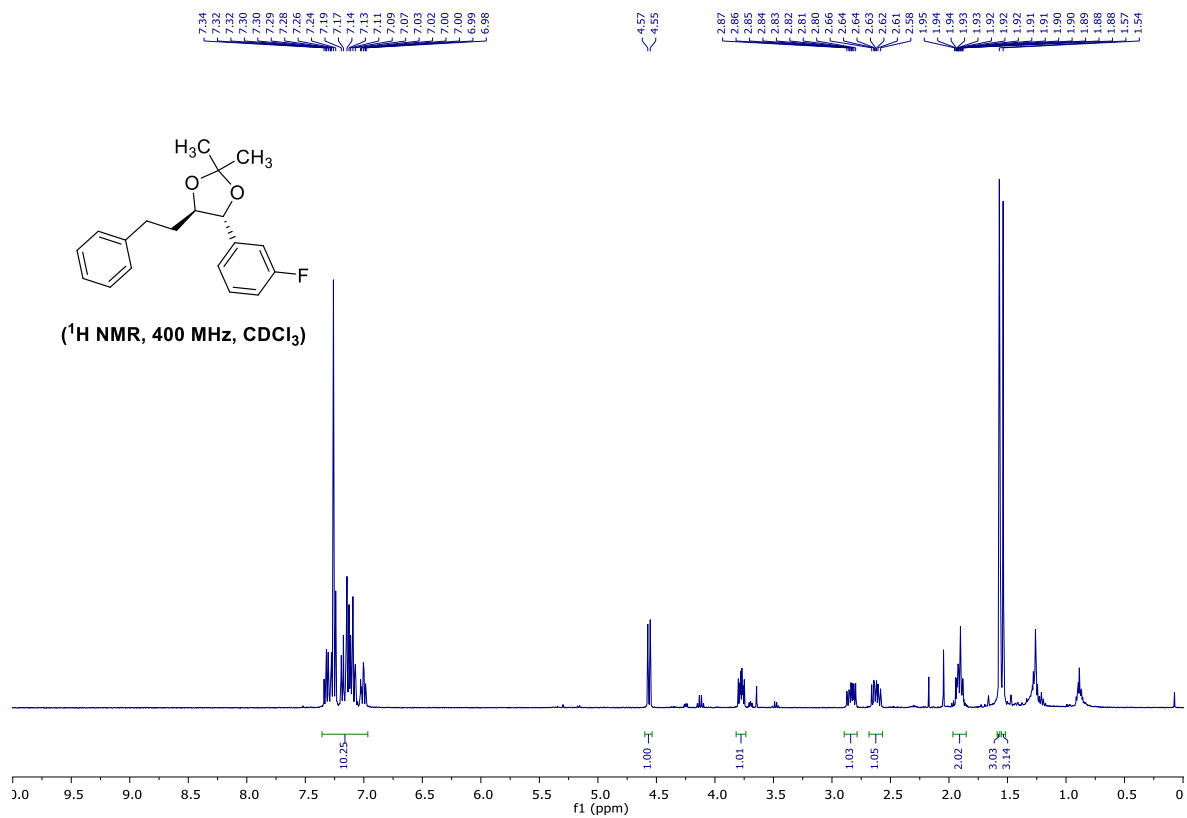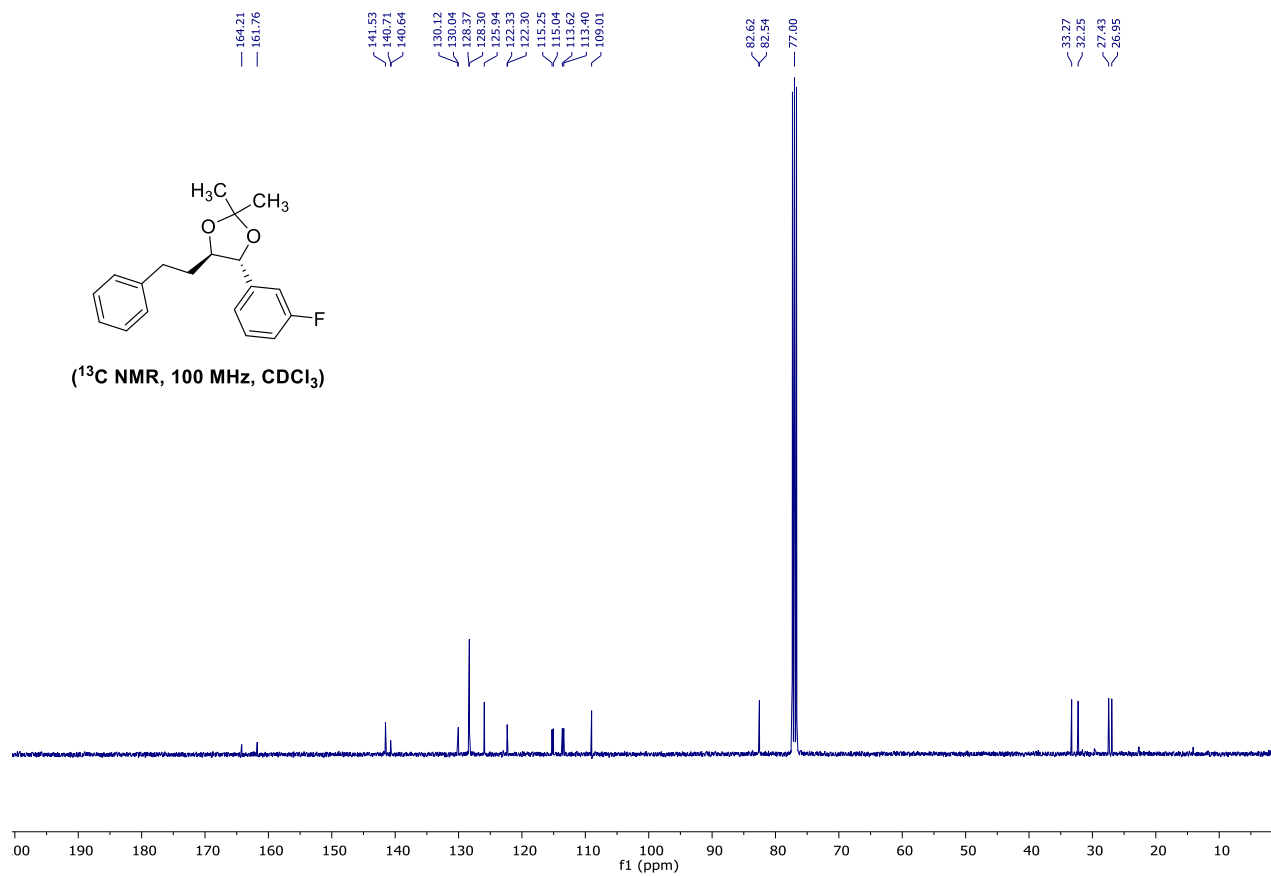

NOESY spectrum of acetone ketal (400 MHz, CDCl<sub>3</sub>)

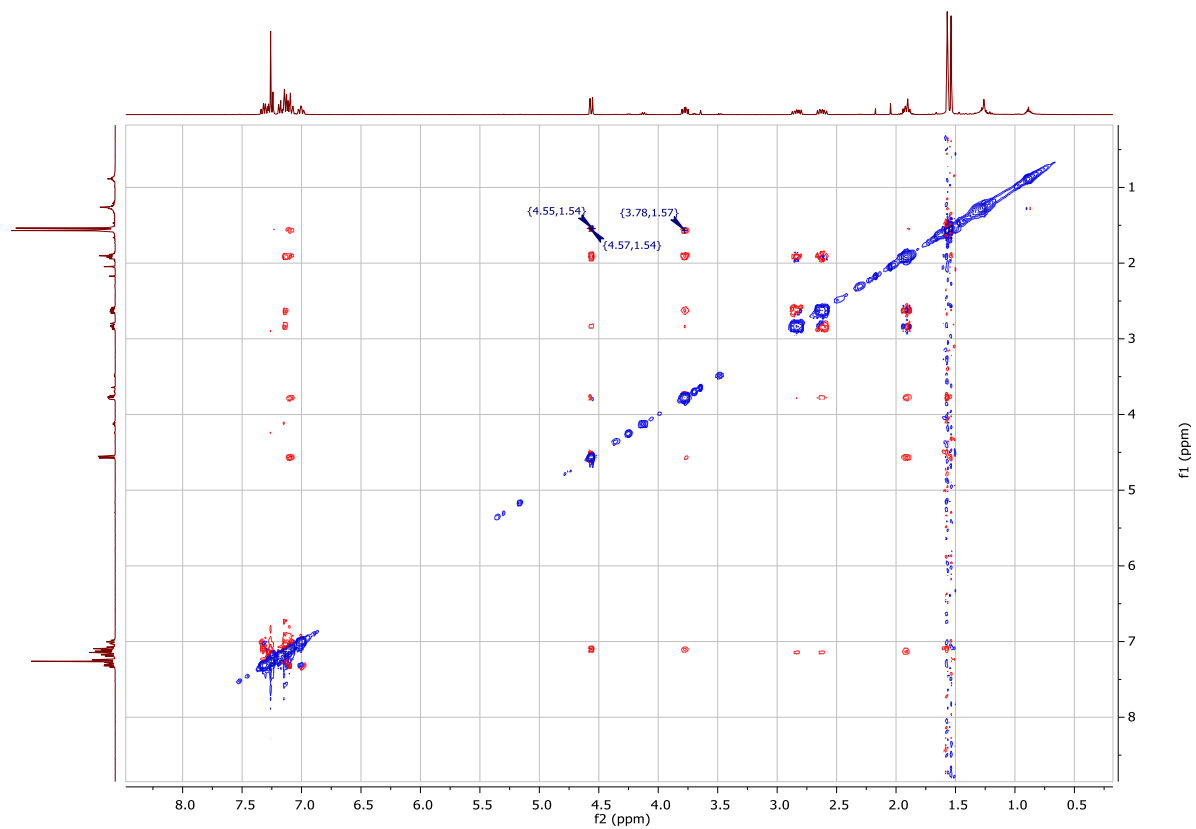

Enlarged view

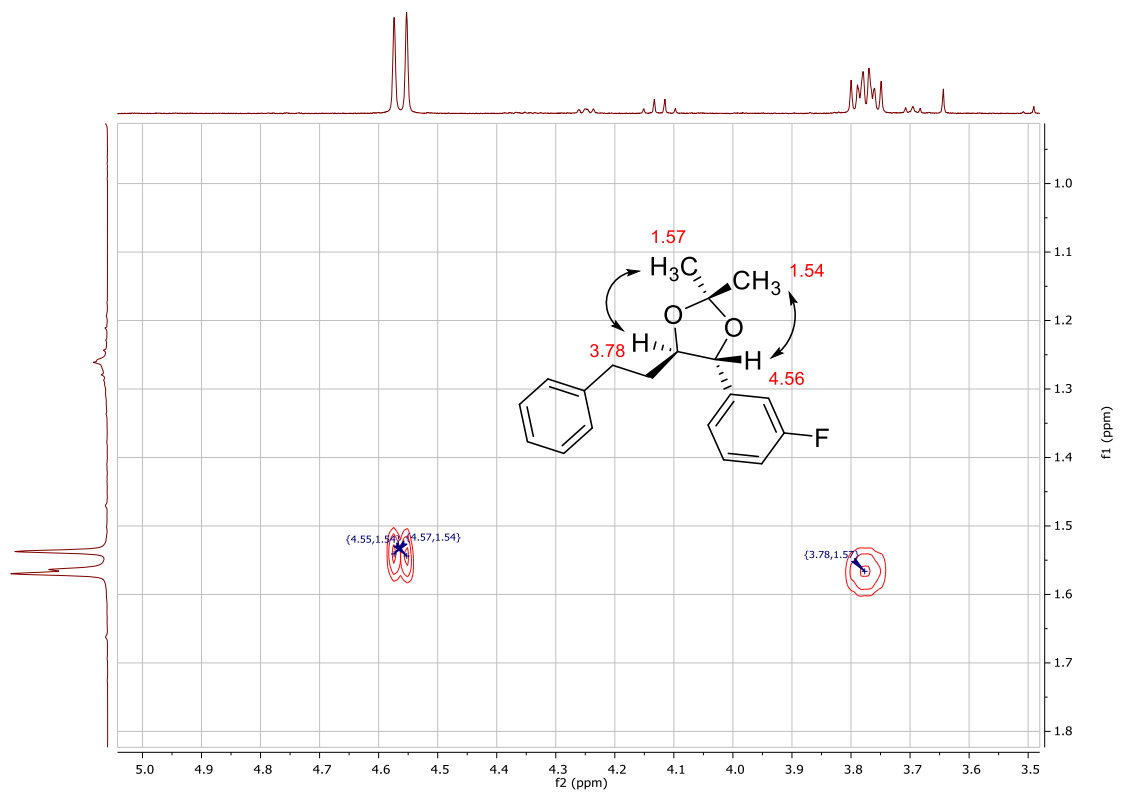



7.33  
7.33  
7.32  
7.32  
7.31  
7.31  
7.30  
7.30  
7.29  
7.29  
7.28  
7.28  
7.28  
7.27  
7.27  
7.26  
7.26  
7.25  
7.25  
7.24  
7.24  
7.23  
7.23  
7.22  
7.22  
7.21  
7.21  
7.20  
7.20  
7.19  
7.19  
7.17  
7.15  
7.13  
5.11  
5.10  
5.10  
5.08  
5.08  
4.99  
4.99  
3.77  
3.76  
3.75  
3.74  
3.74  
2.57  
2.56  
2.56  
2.55  
2.55  
2.52  
2.52  
2.50  
2.50  
2.44  
2.44  
2.41  
2.40  
2.40  
2.40  
2.40  
2.40  
2.12  
2.12  
2.10  
2.10  
2.08  
2.08  
2.07  
2.07  
1.82  
1.82  
1.81  
1.81  
1.79  
1.79  
1.78  
1.78  
1.77  
1.77  
1.76  
1.76  
1.75  
1.75  
1.74  
1.74  
1.72  
1.72  
1.70  
1.70  
1.28  
1.28  
1.23  
1.23  
0.84  
0.84  
0.80  
0.80  
0.79  
0.79  
0.77  
0.77

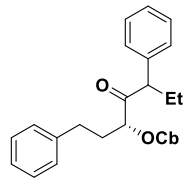

*rac*-43

(<sup>1</sup>H-NMR, 400 MHz, CDCl<sub>3</sub>)

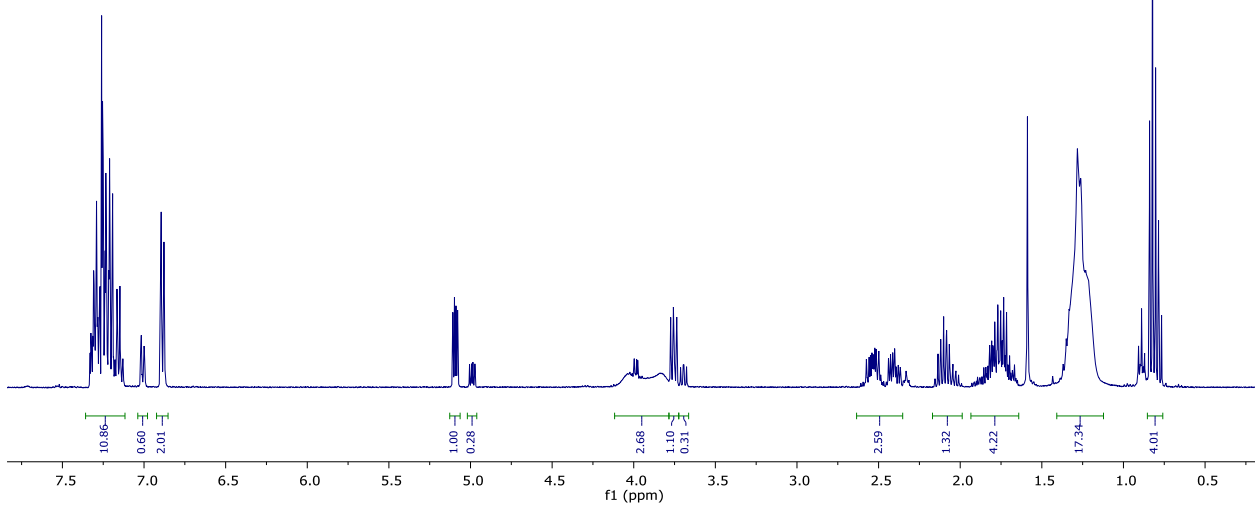

208.32  
207.59  
154.72  
140.87  
138.28  
138.04  
128.69  
128.54  
128.40  
128.34  
128.27  
128.25  
127.15  
127.15  
126.04  
125.96  
78.56  
77.56  
57.39  
55.90  
46.69  
45.63  
32.31  
31.52  
26.38  
26.14  
21.73  
21.49  
20.53  
12.01  
11.94

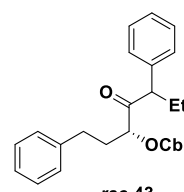

*rac*-43

(<sup>13</sup>C-NMR, 100 MHz, CDCl<sub>3</sub>)

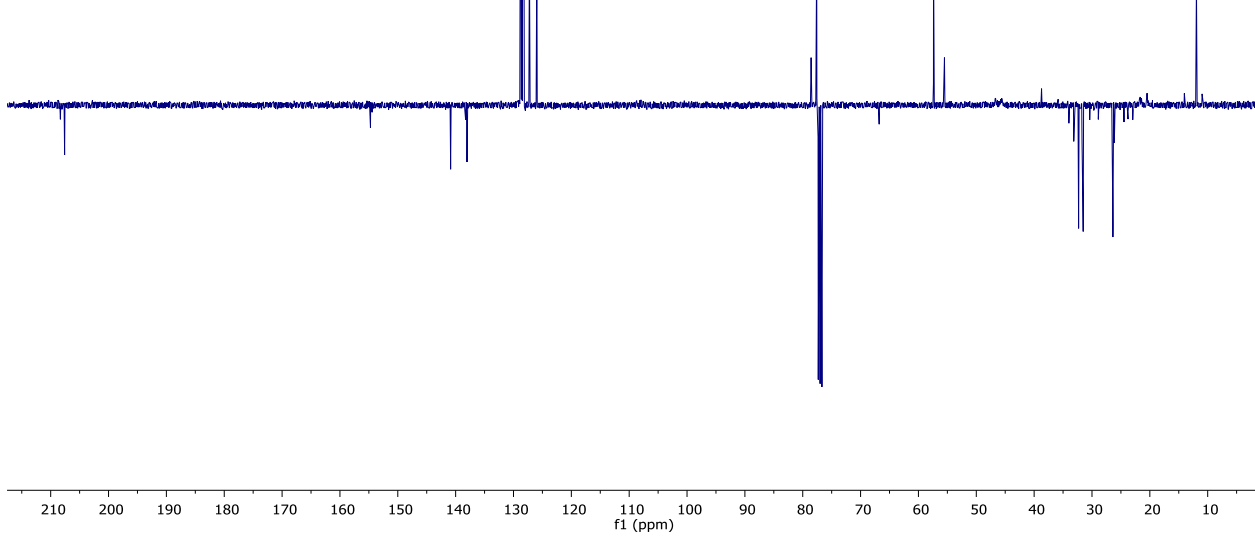

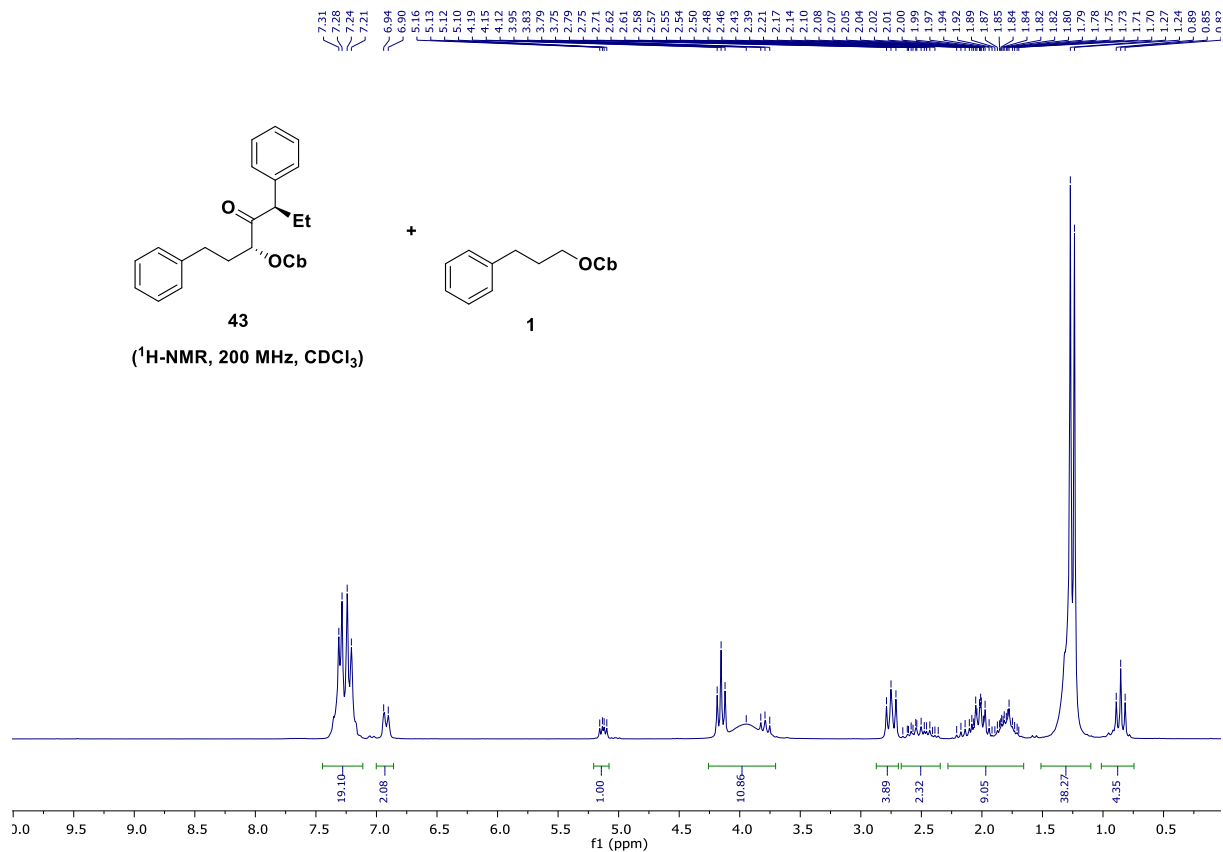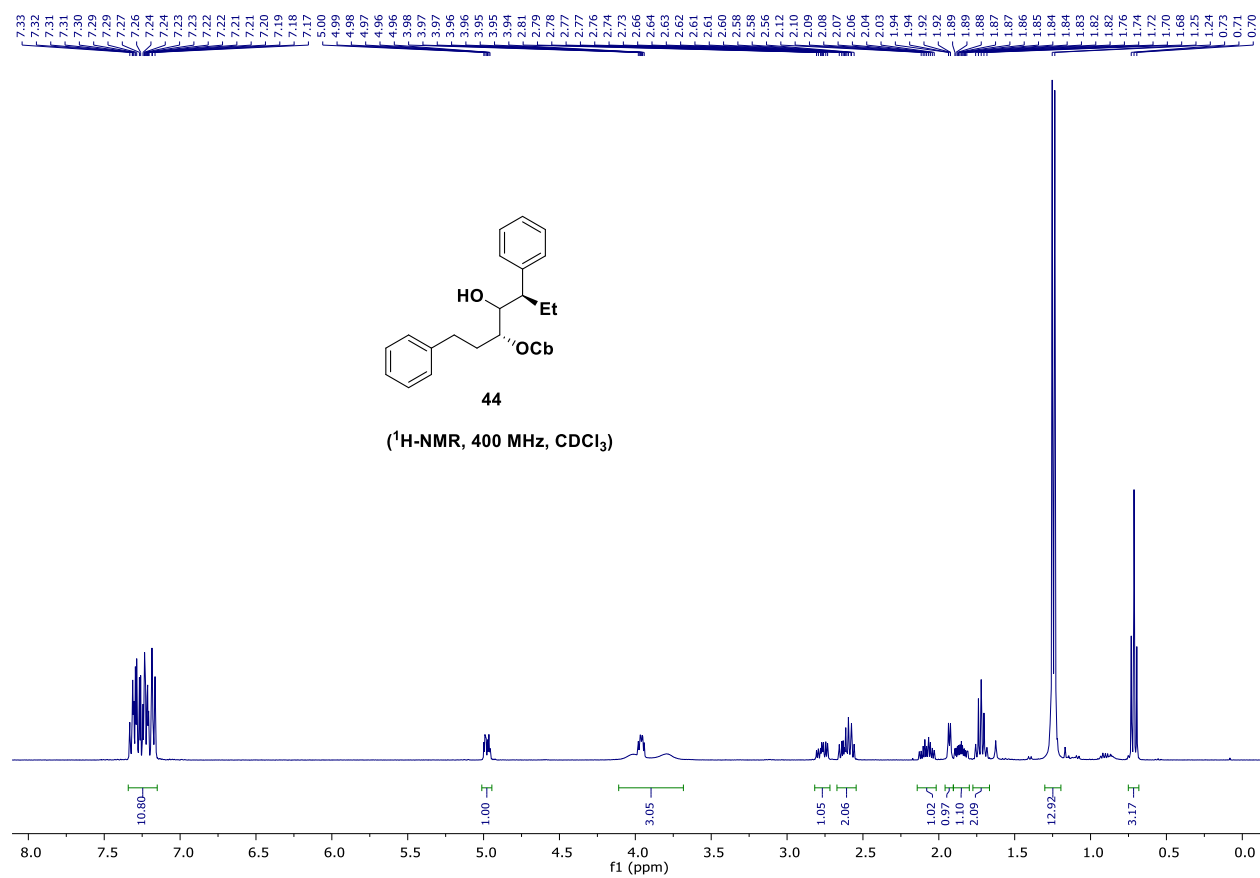

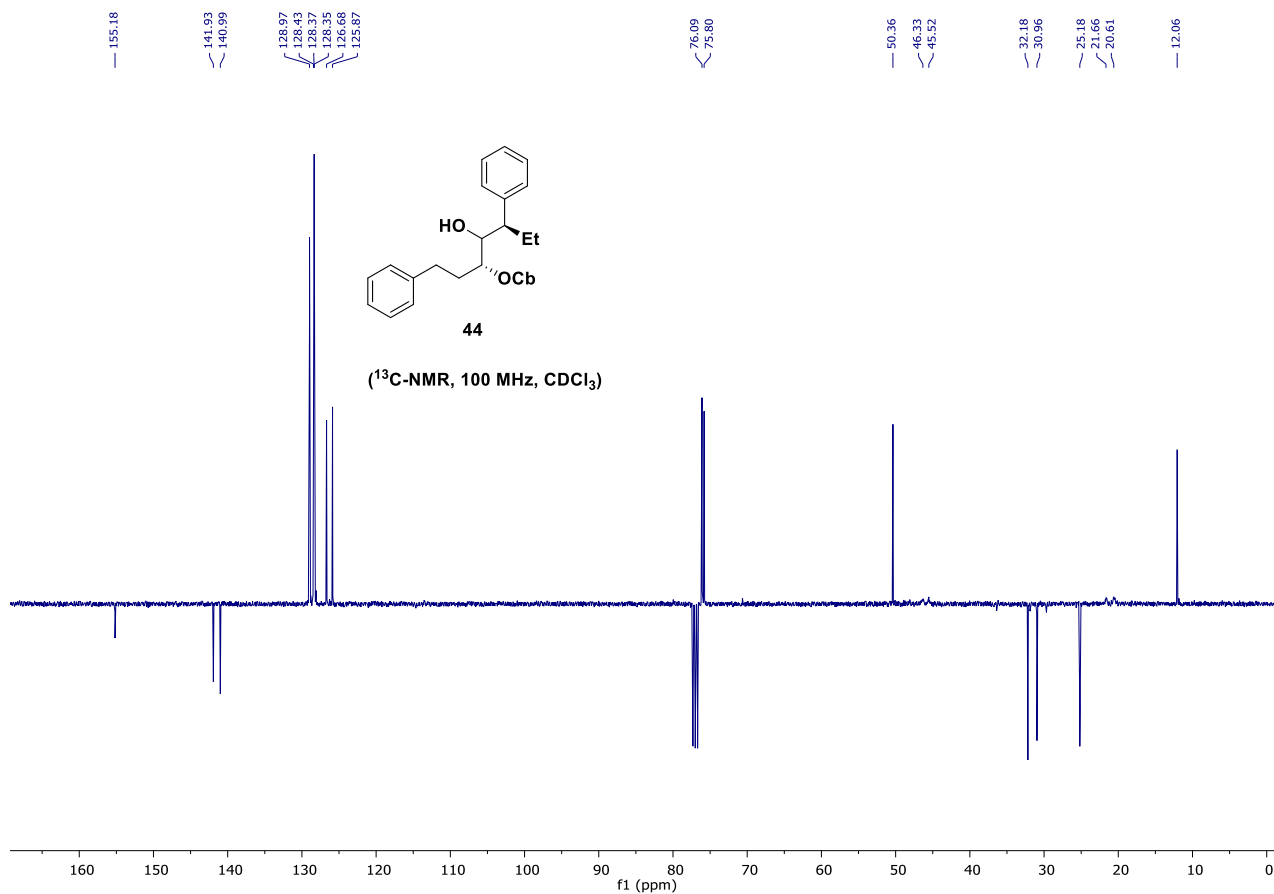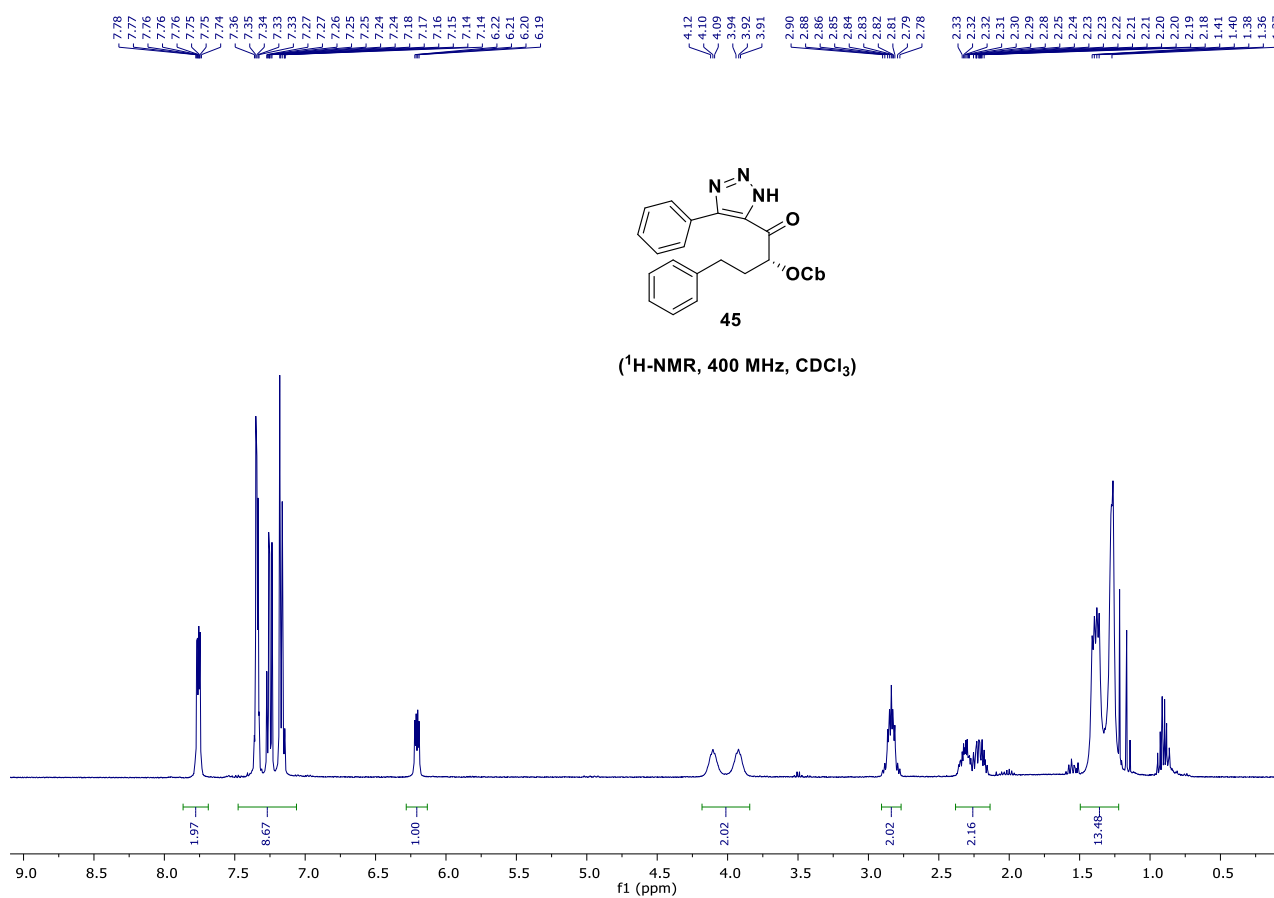

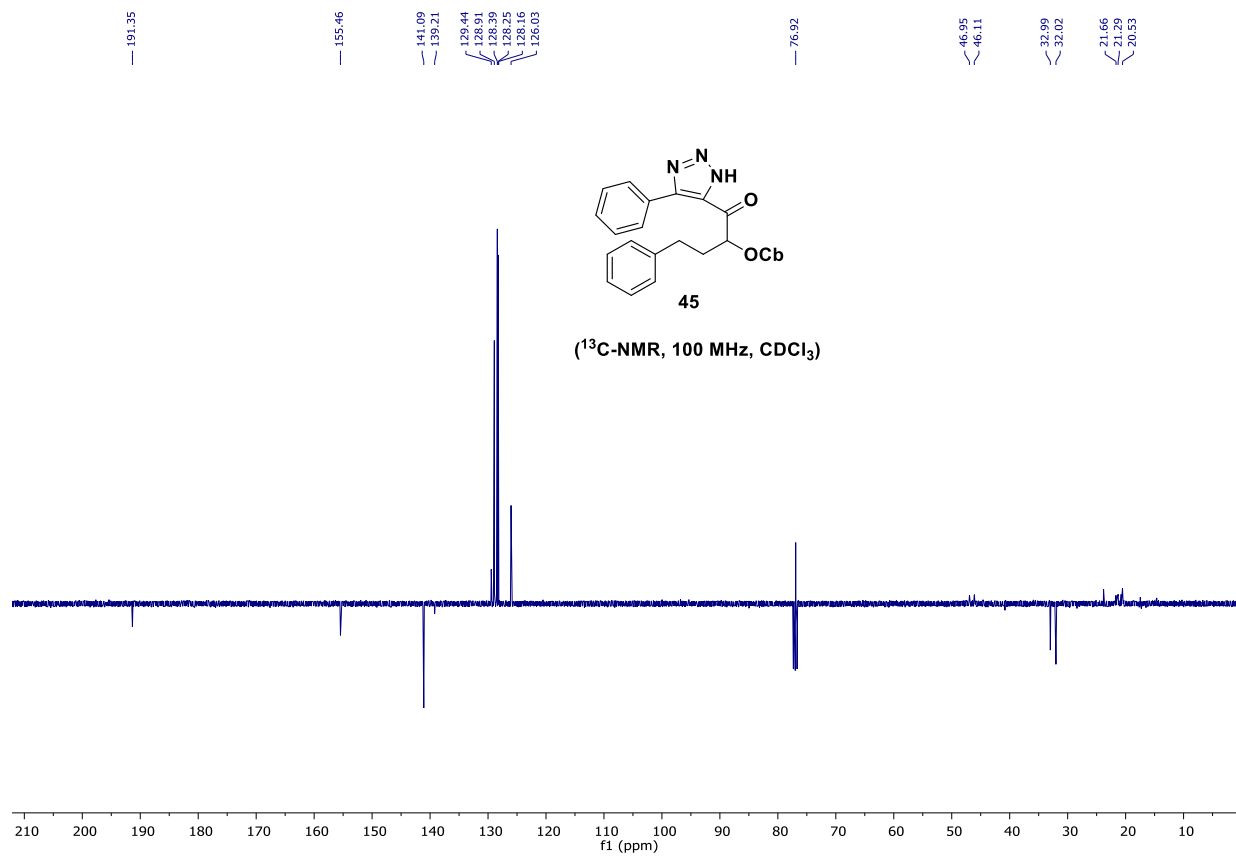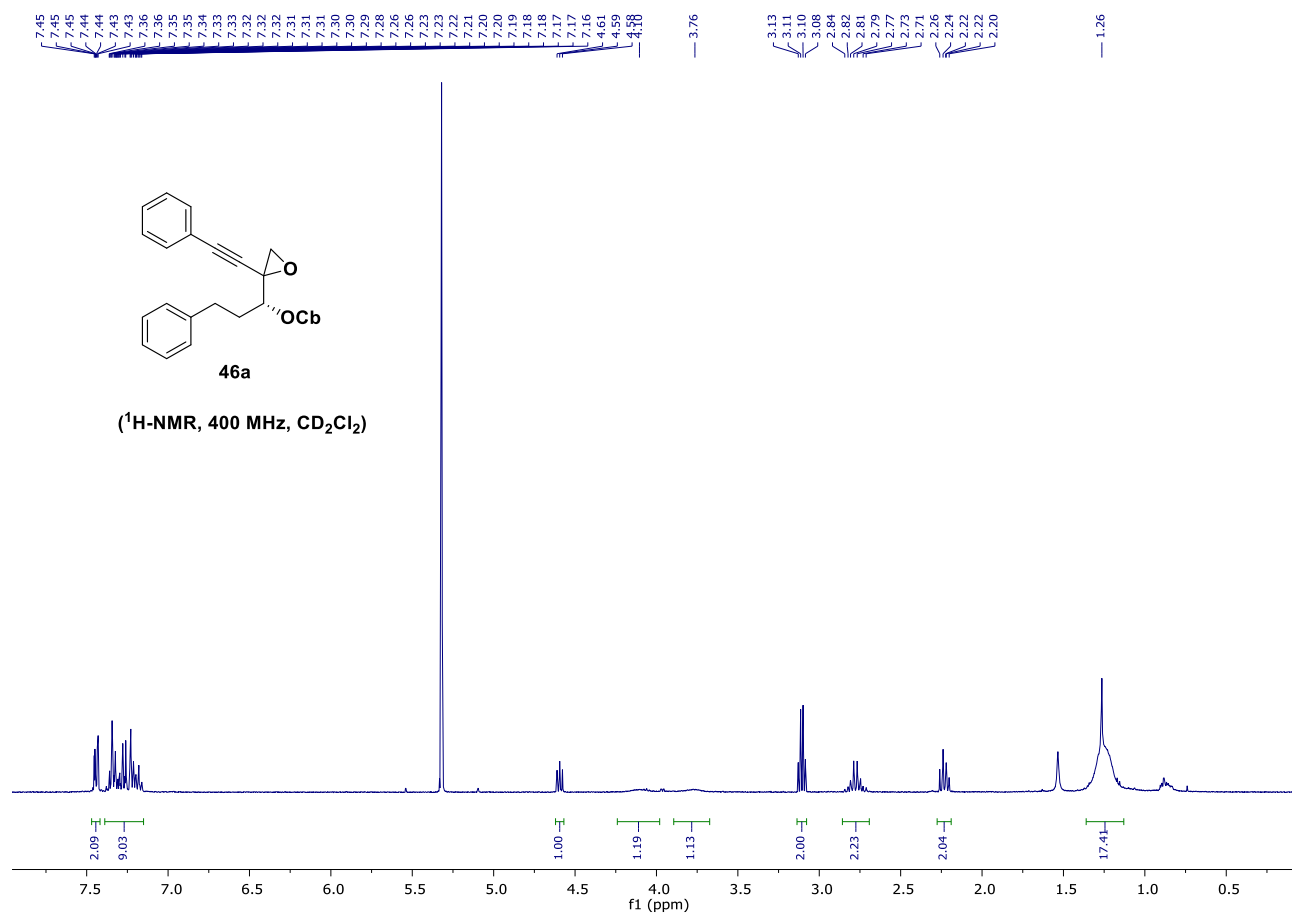

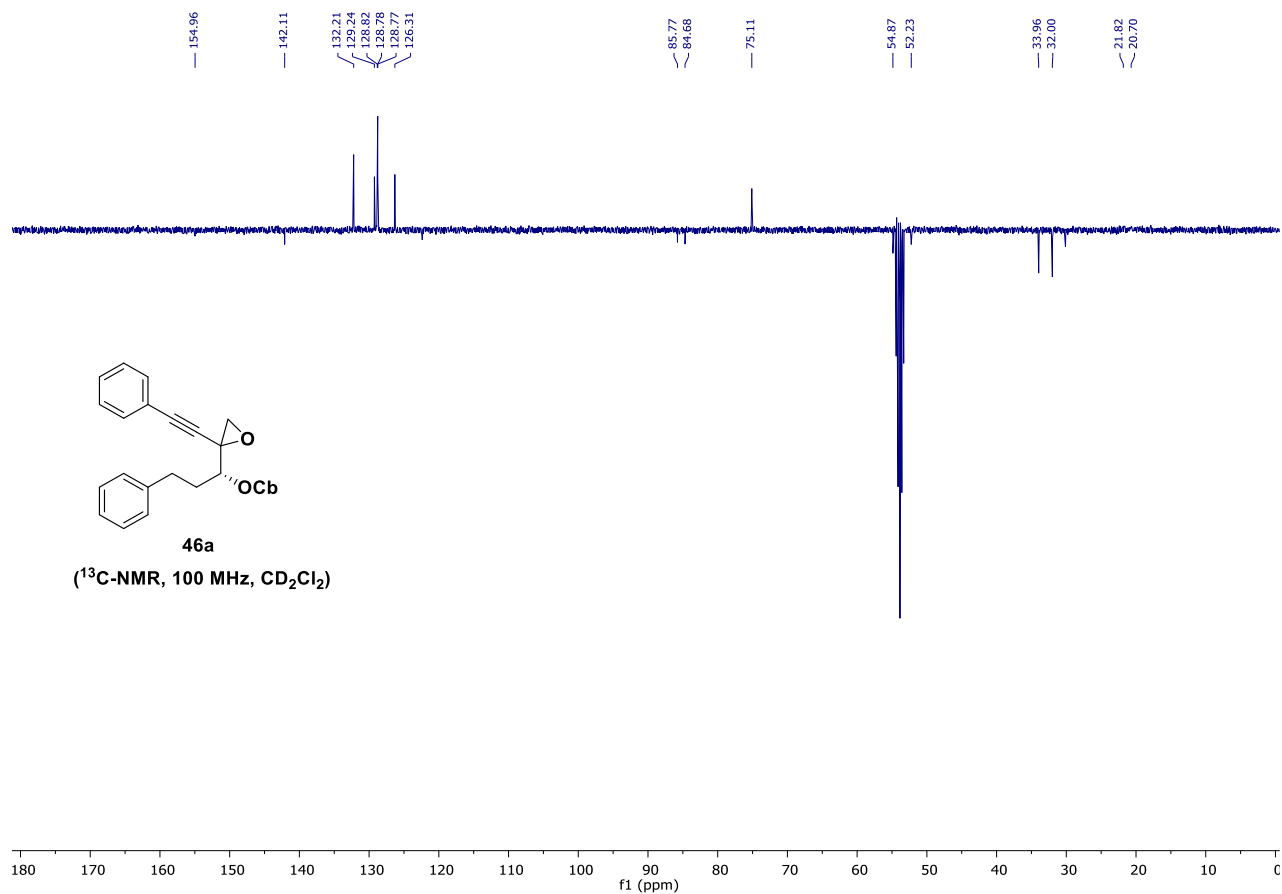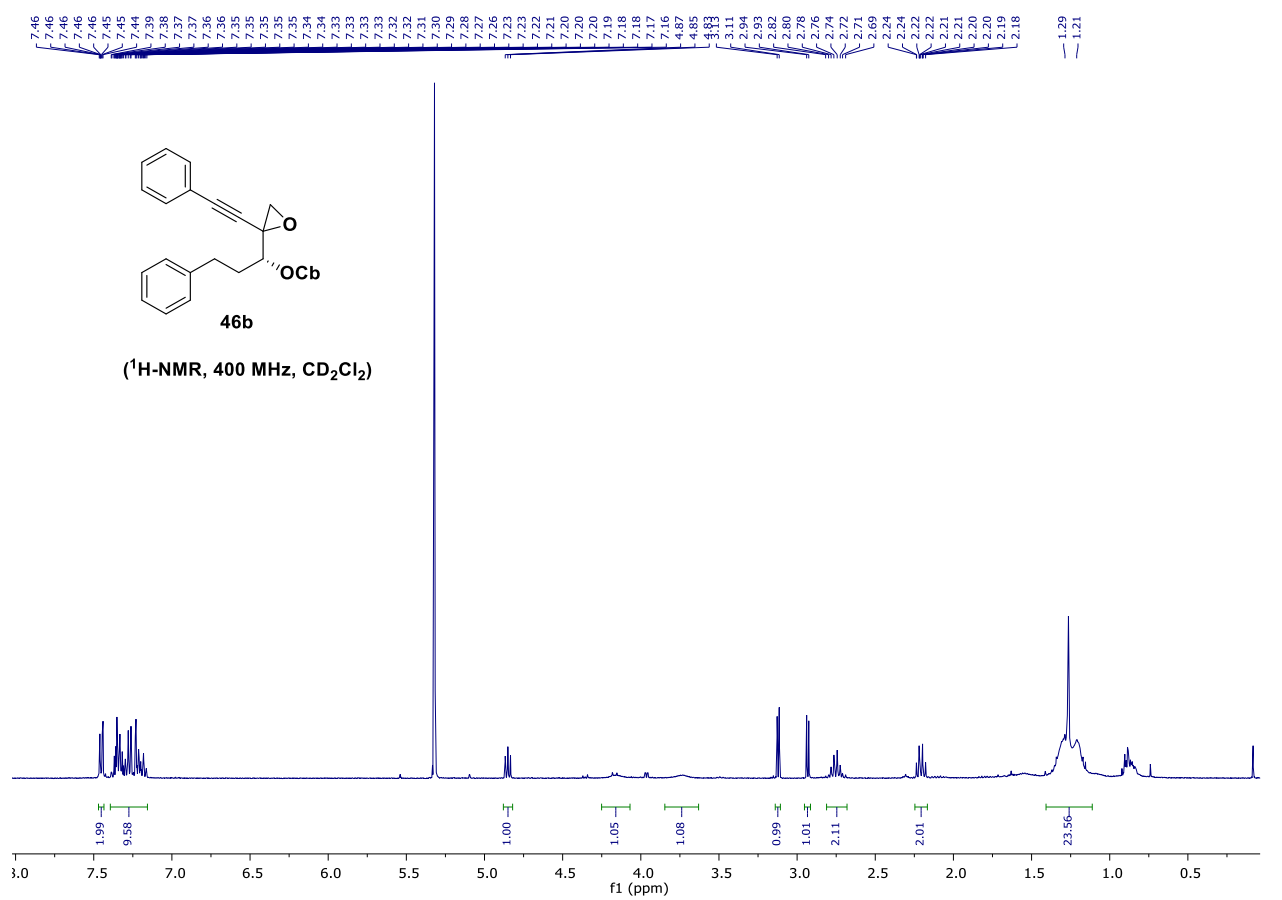

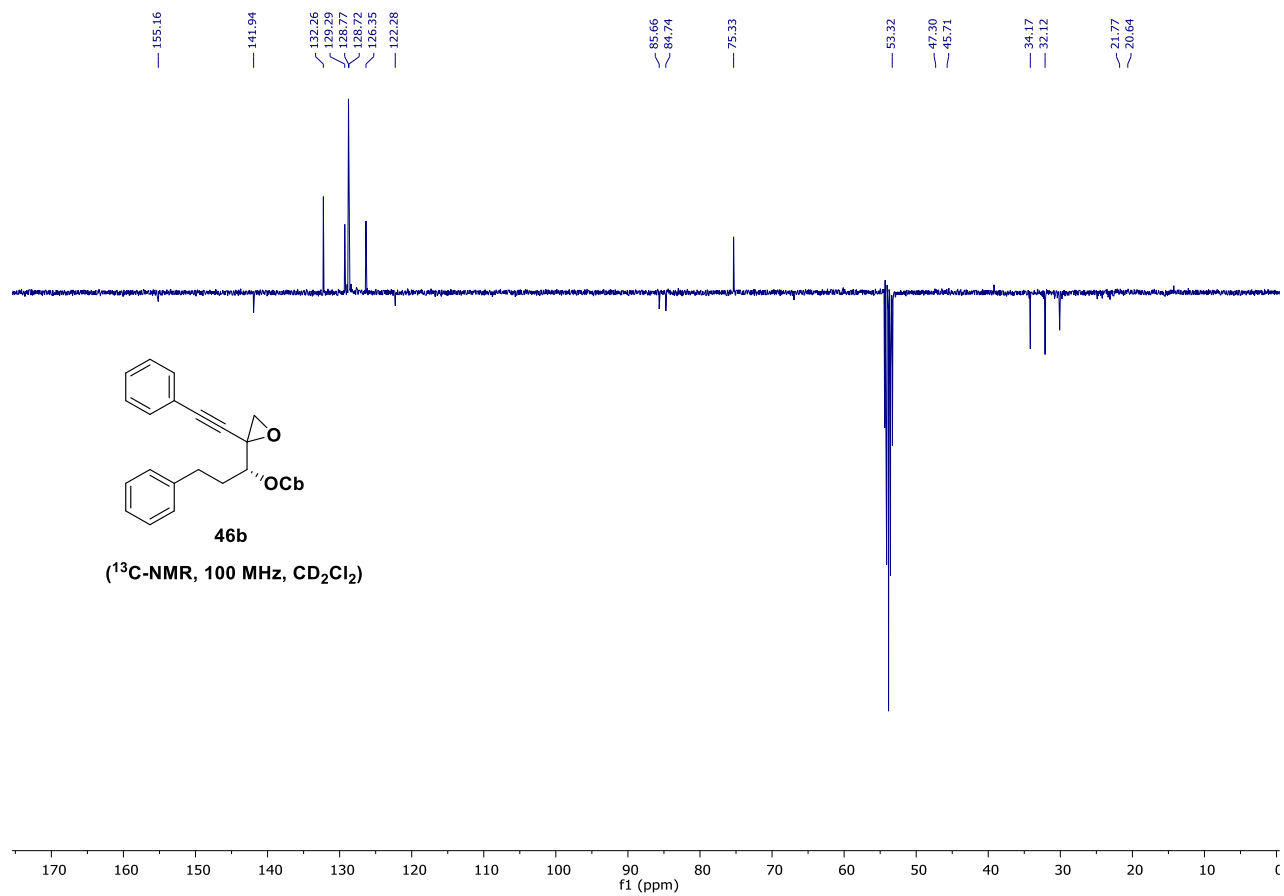

Supplement: CSSC-12-1147-s001.pdf [file CSSC-12-1147-s001.pdf]
